# Supplementary material for: Gastrointestinal Microbiome and Multiple Health Outcomes: Umbrella Review
Source: MDPI journal article supplement (doi:10.3390/nu14183726), 2022-09-09
Supplement: s1 [file s1]

**Supplement Table S8.** Prebiotics/probiotics/synbiotics and side effects.

| outcome(s) of interest                      | estimate d summary effect (95% CI) | number of studies / total studies | number of intervention group or total participants | Heterogeneity ( <i>I</i> <sup>2</sup> , %) | the first author + year of publication | Intervention                                                                                                                                                                 | Duration of Intervention/follow-up | study design | populations                                                                                                      | outcome comparison                                                           | meta-analysis metric    | type of effect model | publication bias |
|---------------------------------------------|------------------------------------|-----------------------------------|----------------------------------------------------|--------------------------------------------|----------------------------------------|------------------------------------------------------------------------------------------------------------------------------------------------------------------------------|------------------------------------|--------------|------------------------------------------------------------------------------------------------------------------|------------------------------------------------------------------------------|-------------------------|----------------------|------------------|
| Incidence of adverse events                 | 0.83 (0.71 to 0.97)                | 32                                | 4329/8305                                          | 49.0                                       | GOLDENBERG J Z 2017[1]                 | probiotics                                                                                                                                                                   | NP                                 | All RCTs     | participants taking antibiotics                                                                                  | any none versus                                                              | RR                      | random               | No serious bias  |
| Adverse Events                              | 0.97 (0.86 to 1.09)*               | 15                                | 6431                                               | NP                                         | SHEN N T 2017[2]                       | probiotics                                                                                                                                                                   | NP                                 | All RCTs     | Hospitalized adults (18 years or older) receiving antibiotic therapy (intravenous, oral, or both) for any reason | any none versus                                                              | RR                      | random               | NP               |
| Incidence of Adverse Events                 | 0.82(0.65 to 1.05)*                | 17                                | 166/1783                                           | 18.0                                       | JOHNSTON B C 2012[3]                   | any dose of a specified probiotic of any strain                                                                                                                              | NP                                 | All RCTs     | adult or pediatric patients treated with antibiotics                                                             | any none versus                                                              | RR                      | random               | No serious bias  |
| the side effects observed in EcN treatment. | 1.44(0.80 to 2.59)*                | 6                                 | 719                                                | 48.0                                       | LOSURDO G 2015[4]                      | Escherichia coli Nissle ( EcN) 1917                                                                                                                                          | NP                                 | All RCTs     | Patients with UC                                                                                                 | EcN standard of care (mesalazine or ciprofloxacin) versus Regimen or placebo | OR                      | Random               | No serious bias  |
| Adverse events                              | 0.00 (-0.01 to 0.01)*              | 24                                | 4415                                               | 75.0                                       | GUO Q 2019 [5]                         | specific, identified probiotic in any form (e.g. capsule, sachet, yogurt). Trials investigating non-specific probiotic or yogurt agents (e.g. products that do not label the | 5 days to 4 weeks                  | All RCTs     | children (0 to 18 years) receiving antibiotics                                                                   | Probiotic Versus Control                                                     | RD(RD: Risk difference) | Random               | No serious bias  |

|                                                                  |                        |    |           |      |                     |                                                                                         |                                                                              |                            |                                                                          |                                                                                                                             |                      |        |                 |  |
|------------------------------------------------------------------|------------------------|----|-----------|------|---------------------|-----------------------------------------------------------------------------------------|------------------------------------------------------------------------------|----------------------------|--------------------------------------------------------------------------|-----------------------------------------------------------------------------------------------------------------------------|----------------------|--------|-----------------|--|
| probiotic strain and dose) were not considered                   |                        |    |           |      |                     |                                                                                         |                                                                              |                            |                                                                          |                                                                                                                             |                      |        |                 |  |
| Incidence of Adverse Events                                      | 0.00 (-0.02 to 0.02)*  | 7  | 1183/2363 | 66.0 | BLAABJERG S 2017[6] | Probiotics                                                                              | NA                                                                           | All RCTs                   | outpatients taking oral antibiotics                                      | probiotics vs. Placebo or no treatment                                                                                      | RD (risk difference) | random | NP              |  |
| Adverse events - Overt hepatic encephalopathy                    | 0.29(0.16 to 0.51)*    | 10 | 585       | 0.0  | DALAL R 2017 [7]    | probiotics                                                                              | follow-up: 2 weeks to 3 months                                               | randomised clinical trials | people with any grade of acute or chronic hepatic encephalopathy         | probiotics in any dosage vs. placebo or no intervention, or with any other treatment in people with hepatic encephalopathy. | RR                   | random | NP              |  |
| Adverse events - Change of/or withdrawal from treatment          | 0.70(0.46 to 1.07)*    | 9  | 551       | 11.0 |                     |                                                                                         | follow-up: 1 month to 3 months                                               |                            |                                                                          |                                                                                                                             |                      |        |                 |  |
| any adverse event                                                | 1.09 (0.91 to 1.29)*   | 36 | 4183      | 36.0 | FORD A C 2018[8]    | probiotics                                                                              | Minimum treatment duration of 7 days<br>Minimum follow-up duration of 7 days | All RCTs                   | Adults (participants aged >16 years)                                     | probiotics vs. Control group                                                                                                | RR                   | random | 0.08            |  |
| Adverse events in active UC                                      | 1.21 (0.64 to 2.27)*   | 6  | 281/507   | -    | DERWA 2017 [9]      | Y probiotics                                                                            | NP                                                                           | All RCTs                   | Adults (>90% of patients aged >16 years) with inflammatory bowel disease | probiotics vs. placebo                                                                                                      | RR                   | random | NA              |  |
| Adverse events in quiescent UC                                   | 1.09 (0.71 to 1.67)*   | 3  | 277/555   | -    |                     |                                                                                         |                                                                              |                            |                                                                          | Probiotics vs. 5-ASA                                                                                                        |                      |        |                 |  |
| Adverse events in CD in remission following a surgical resection | 0.81 (0.61 tp 1.08)*   | 3  | 129/263   | -    |                     |                                                                                         |                                                                              |                            |                                                                          | probiotics vs. placebo                                                                                                      |                      |        |                 |  |
| the incidence of adverse effect                                  | 0.80 (0.43 to 1.50)*   | 10 | 762       | 0.0  | YEH T L 2018[10]    | probiotics or prebiotics                                                                | NP                                                                           | Control trials             | adults                                                                   | probiotics or prebiotics vs. placebo                                                                                        | OR                   | random | No serious bias |  |
| Number of adverse events, dichotomous outcome                    | -0.00 (-0.03 to 0.03)* | 6  | 279       | 0.0  | SEILER C L 2020[11] | Probiotics of any type and dose, administered orally in any form (drink/ powder/capsule | at least 2 weeks                                                             | All RCTs                   | Patients with Celiac disease (CD)                                        | probiotics vs. placebo                                                                                                      | MD                   | random | NP              |  |

|                |                      |    |      |     |                 |   |                                        |                 |          |                                                                                                             |             |    |        |                 |
|----------------|----------------------|----|------|-----|-----------------|---|----------------------------------------|-----------------|----------|-------------------------------------------------------------------------------------------------------------|-------------|----|--------|-----------------|
| Adverse events | 0.77 (0.47 to 1.26)* | 4  | 355  | 0.0 | WILSON 2019[12] | B | prebiotics                             | 2-12 weeks      | All RCTs | Adult patients ≥18 and ≤64 y with Irritable bowel syndrome (IBS) or other Functional bowel disorders (FBDs) | vs. placebo | OR | random | No serious bias |
| Adverse events | 0.27 (0.07 to 1.05)* | 5  | 409  | 0.0 | Zhang 2020[13]  | J | prebiotics, probiotics, and synbiotics | At least 7 days | All RCTs | adult patients (over the age of 16 years) with functional dyspepsia (FD)                                    | Vs. placebo | RR | fixed  | NP              |
| adverse events | 0.72 (0.55 to 0.94)  | 30 | 2430 | NP  | Sohail 2018[14] | G | probiotic Medilac-S                    | 4-96 weeks      | All RCTs | human                                                                                                       | Vs. control | RR | fixed  | No serious bias |

\* No statistical significance; CI, confidence interval; RCT, randomized controlled trial; RR, relative risk; HR, hazard ratio; MD, mean

difference; SMD, standard mean difference; WMD, weighted mean difference; OR, odds ratio; NA, not available; NP, not published.

## References

1. Goldenberg, J.Z.; Yap, C.; Lytvyn, L.; Lo, C.K.; Beardsley, J.; Mertz, D.; Johnston, B.C. Probiotics for the prevention of Clostridium difficile-associated diarrhea in adults and children. *Cochrane Db. Syst. Rev.* **2017**, 2017, D6095, doi: 10.1002/14651858.CD006095.pub4.
2. Shen, N.T.; Maw, A.; Tmanova, L.L.; Pino, A.; Ancy, K.; Crawford, C.V.; Simon, M.S.; Evans, A.T. Timely Use of Probiotics in Hospitalized Adults Prevents Clostridium difficile Infection: A Systematic Review With Meta-Regression Analysis. *Gastroenterology* **2017**, 152, 1889-1900, doi: 10.1053/j.gastro.2017.02.003.
3. Johnston, B.C.; Ma, S.S.Y.; Goldenberg, J.Z.; Thorlund, K.; Vandvik, P.O.; Loeb, M.; Guyatt, G.H. Probiotics for the Prevention of Clostridium difficile Associated Diarrhea. *Ann. Intern. Med.* **2012**, 157, 878, doi: 10.7326/0003-4819-157-12-201212180-00563.
4. Losurdo, G.; Iannone, A.; Contaldo, A.; Ierardi, E.; Di Leo, A.; Principi, M. Escherichia coli Nissle 1917 in Ulcerative Colitis Treatment: Systematic Review and Meta-analysis. *J. Gastrointest. Liver* **2020**, 24, 499-505, doi: 10.15403/jgld.2014.1121.244.ecn.
5. Guo, Q.; Goldenberg, J.Z.; Humphrey, C.; Dib, R.E.; Johnston, B. PROBIOTICS FOR THE PREVENTION OF PEDIATRIC ANTIBIOTIC-ASSOCIATED DIARRHEA. *Gastroenterology* **2019**, 156, 220, doi: 10.1016/S0016-5085%2819%2937348-2.
6. Blaabjerg, S.; Artzi, D.; Aabenhus, R. Probiotics for the Prevention of Antibiotic-Associated Diarrhea in Outpatients—A Systematic Review and Meta-Analysis. *Antibiotics* **2017**, 6, 21, doi: 10.3390/antibiotics6040021.

7. Dalal, R.; Mcgee, R.G.; Riordan, S.M.; Webster, A.C. Probiotics for people with hepatic encephalopathy. *Cochrane Db. Syst. Rev.* **2021**, 2021, doi: 10.1002/14651858.CD008716.pub3.
8. Ford, A.C.; Harris, L.A.; Lacy, B.E.; Quigley, E.M.M.; Moayyedi, P. Systematic review with meta-analysis: the efficacy of prebiotics, probiotics, synbiotics and antibiotics in irritable bowel syndrome. *Aliment. Pharm. Ther.* **2018**, *48*, 1044-1060, doi: 10.1111/apt.15001.
9. Derwa, Y.; Gracie, D.J.; Hamlin, P.J.; Ford, A.C. Systematic review with meta-analysis: the efficacy of probiotics in inflammatory bowel disease. *Aliment. Pharm. Ther.* **2017**, *46*, 389-400, doi: 10.1111/apt.14203.
10. Yeh, T.; Shih, P.; Liu, S.; Lin, C.; Liu, J.; Lei, W.; Lin, C. The influence of prebiotic or probiotic supplementation on antibody titers after influenza vaccination: a systematic review and meta-analysis of randomized controlled trials. *Drug Des. Dev. Ther.* **2018**, *Volume 12*, 217-230, doi: 10.2147/DDDT.S155110.
11. Seiler, C.L.; Kiflen, M.; Stefanolo, J.P.; Bai, J.C.; Bercik, P.; Kelly, C.P.; Verdu, E.F.; Moayyedi, P.; Pinto-Sanchez, M.I. Probiotics for Celiac Disease: A Systematic Review and Meta-Analysis of Randomized Controlled Trials. *Am. J. Gastroenterol.* **2020**, *115*, 1584-1595, doi: 10.14309/ajg.0000000000000749.
12. Wilson, B.; Rossi, M.; Dimidi, E.; Whelan, K. Prebiotics in irritable bowel syndrome and other functional bowel disorders in adults: a systematic review and meta-analysis of randomized controlled trials. *The American Journal of Clinical Nutrition* **2019**, *109*, 1098-1111, doi: 10.1093/ajcn/nqy376.
13. Zhang, J.; Wu, H.M.; Wang, X.; Xie, J.; Li, X.; Ma, J.; Wang, F.; Tang, X. Efficacy of prebiotics and probiotics for functional dyspepsia. *Medicine* **2020**, *99*, e19107, doi: 10.1097/MD.00000000000019107.
14. 14. Sohail, G.; Xu, X.; Christman, M.C.; Tompkins, T.A. Probiotic Medilac-S® for the induction of clinical remission in a Chinese population with ulcerative colitis: A systematic review and meta-analysis. *World Journal of Clinical Cases* **2018**, *6*, 961-984, doi: 10.12998/wjcc.v6.i15.961.
