# Supplementary material for: Gastrointestinal Microbiome and Multiple Health Outcomes: Umbrella Review
Source: MDPI journal article supplement (doi:10.3390/nu14183726), 2022-09-09
Supplement: s1 [file s1]

**Supplement Table S9.** Fecal microbiota transplant and multiple health outcomes.

| outcome(s) of interest                                                                                         | estimated effect (95% CI) | summary of studies / total studies | number of studies | number of intervention group or total participants | Heterogeneity ( <i>I</i> <sup>2</sup> , %)                        | the first author + year of publication | Intervention | Duration of Intervention/follow-up      | study design                                                                            | populations                                              | outcome comparison                 | meta-analysis metric | type of effect model | publication bias |
|----------------------------------------------------------------------------------------------------------------|---------------------------|------------------------------------|-------------------|----------------------------------------------------|-------------------------------------------------------------------|----------------------------------------|--------------|-----------------------------------------|-----------------------------------------------------------------------------------------|----------------------------------------------------------|------------------------------------|----------------------|----------------------|------------------|
| FMT effectiveness (Recovery was defined as the absence of diarrhea between 8 and 13 weeks following treatment) | 0.82 (0.75 to 0.89)       | 15                                 | 1168              | 20.0                                               | POMARE S B R 2021[1]                                              | fecal microbiota transplant (FMT)      | NP           | clinical trials (n=12) and cohort (n=3) | adult human participants with diagnoses of C. difficile diarrhea aged over 19 years old | any versus none                                          | the proportion of treated patients | fixed                | 0.511                |                  |
|                                                                                                                | -0.74 (-0.90 to -0.58)    | NP                                 | NP                | NP                                                 | administration of FMT by colonoscopy versus enema                 |                                        |              |                                         |                                                                                         | MD                                                       | NP                                 | NP                   |                      |                  |
|                                                                                                                | 0.44 (0.20 to 0.69)       | NP                                 | NP                | NP                                                 | colonoscopy versus capsule                                        |                                        |              |                                         |                                                                                         |                                                          |                                    |                      |                      |                  |
|                                                                                                                | -2.28 (-2.63 to -1.93)    | NP                                 | NP                | NP                                                 | colonoscopy versus esophagogastroduodenoscopy                     |                                        |              |                                         |                                                                                         |                                                          |                                    |                      |                      |                  |
| Clinical cure from rCDI defined as resolution of diarrhea after single FMT infusion.                           | 2.45 (0.78 to 7.71)*      | 5                                  | 79/112            | 69.0                                               | KHAN M Y 2018[2]                                                  | fecal microbiota transplant (FMT)      | NP           | All RCTs                                | Patients with documented recurrent Clostridium difficile infection (CDI)                | Fresh FMT compared with intervention (frozen FMT and MT) | OR                                 | random               | NP                   |                  |
|                                                                                                                | 0.62 (0.15 to 2.54)*      | 2                                  | 57/63             | 0.0                                                | frozen FMT using upper versus lower route for diarrhea resolution |                                        |              |                                         |                                                                                         |                                                          |                                    |                      |                      |                  |
| Resolution of diarrhea after multiple fecal microbiota transplantation infusions                               | 1.82 (0.6 to 5.59)*       | 3                                  | 37/43             | 0.0                                                |                                                                   |                                        |              |                                         |                                                                                         | Fresh FMT versus rest of the treatments                  |                                    |                      |                      |                  |
| Clostridium difficile recurrence                                                                               | 0.18 (0.02 to 2.23)*      | 3                                  | 12/52             | 82.0                                               |                                                                   |                                        |              |                                         |                                                                                         | Fresh FMT versus rest of the treatments                  |                                    |                      |                      |                  |
| Resolution of diarrhea                                                                                         | 2.98 (0.56 to 15.93)*     | 3                                  | 33/52             | 72.0                                               |                                                                   |                                        |              |                                         |                                                                                         | single FMT infusion versus medical treatment (MT) only   |                                    |                      |                      |                  |
| Resolution of diarrhea                                                                                         | 3.68 (0.74 to 18.22)*     | 2                                  | 7/10              | 0.0                                                |                                                                   |                                        |              |                                         |                                                                                         | multiple FMT infusion versus MT only                     |                                    |                      |                      |                  |
| not achieving Combined Remission or Endoscopic                                                                 | 0.80 (0.71 to 0.89)       | 4                                  | 101/140           | 0.0                                                | NARULA N 2017[3]                                                  | fecal microbiota transplant in         | 6-12weeks    | All RCTs                                | adult subjects with endoscopically and clinically active UC based on clinical           | any versus none                                          | RR                                 | random               | NP                   |                  |

| Remission/Response with donor FMT                              |                       |    |         |      |             | ulcerative colitis(UC) |                                                                               |    | assessment scores commonly used for UC |                           |                                  |                 |              |         |                 |
|----------------------------------------------------------------|-----------------------|----|---------|------|-------------|------------------------|-------------------------------------------------------------------------------|----|----------------------------------------|---------------------------|----------------------------------|-----------------|--------------|---------|-----------------|
| not achieving Clinical remission with donor FMT                | 0.76(0.62 to 0.93)    | 4  | 81/140  | 31.0 |             |                        |                                                                               |    |                                        |                           |                                  |                 |              |         |                 |
| not achieving endoscopic remission with donor FMT              | 0.85(0.69 to 1.05)*   | 4  | 103/140 | 77.0 |             |                        |                                                                               |    |                                        |                           |                                  |                 |              |         |                 |
| clinical remission                                             | 40.5%(24.7% to 58.7%) | 13 | 141     | 36.5 | SHI 2016[4] | Y                      | fecal microbiota transplantat ion in ulcerative colitis(UC)                   | NP | cohort                                 | patients with colitis FMT | of any age ulcerative undertaken | any versus none | pooled rates | Rando m | No serious bias |
| clinical response                                              | 66.1%(43.7%to 83.0%)  | 11 | 132     | 40.2 |             |                        |                                                                               |    |                                        |                           |                                  |                 |              |         |                 |
| combined clinical remission with endoscopic remission/response | 0.76(0.65 to 0.89)    | 3  | 60/86   | 0.0  | LIU 2021[5] | X                      | Fecal microbiota transplantat ion from pooled donor in ulcerative colitis(UC) | NP | All RCTs                               | patients with colitis FMT | of any age ulcerative undertaken | any versus none | RR           | Rando m | NP              |
|                                                                | 0.79(0.70 to 0.97)    | 2  | 45/61   | 0.0  |             |                        | Fecal microbiota transplantat ion from single donor in ulcerative colitis(UC) |    |                                        |                           |                                  |                 |              |         |                 |
|                                                                | 0.79(0.70 to 0.89)    | 3  | 85/117  | 0.0  |             |                        | FMT via the lower gastrointestinal tract                                      |    |                                        |                           |                                  |                 |              |         |                 |
|                                                                | 0.79(0.58 to 1.09)*   | 2  | 20/30   | 8.0  |             |                        | FMT via the upper gastrointestinal tract                                      |    |                                        |                           |                                  |                 |              |         |                 |
|                                                                | 0.79(0.69 to 0.90)    | 3  | 63/86   | 0.0  |             |                        | FET with higher frequency                                                     |    |                                        |                           |                                  |                 |              |         |                 |
|                                                                | 0.79(0.65 to 0.96)    | 2  | 42/61   | 0.0  |             |                        | FET with lower                                                                |    |                                        |                           |                                  |                 |              |         |                 |



|                                                  |                    |   |        |      |                  |                                   |    |                                              |                        |                                                    |                            |    |         |    |
|--------------------------------------------------|--------------------|---|--------|------|------------------|-----------------------------------|----|----------------------------------------------|------------------------|----------------------------------------------------|----------------------------|----|---------|----|
| not achieving antimicrobial resistance remission | 0.44(0.20 to 0.99) | 4 | 57/111 | 65.0 | TARIQ R 2019[11] | fecal microbiota transplantat ion | NP | All case series studie s with a contro l arm | disease, Pouchitis and | adult (>18 years) population With AMR colonization | FMT versus treatment naive | RR | Rando m | NP |
| (AMR)                                            | 0.37(0.18 to 0.79) | 2 | 26/56  | 23.0 |                  |                                   |    |                                              |                        |                                                    |                            |    |         |    |

\* No statistical significance; CI, confidence interval; RCT, randomized controlled trial; RR, relative risk; HR, hazard ratio; MD, mean difference; SMD, standard mean difference; WMD, weighted mean difference; OR, odds ratio; NA, not available; NP, not published.

## References

1. Pomares Bascuñana, R.Á.; Veses, V.; Sheth, C.C. Effectiveness of fecal microbiota transplant for the treatment of Clostridioides difficile diarrhea: a systematic review and meta-analysis. *Lett. Appl. Microbiol.* **2021**, *73*, 149-158, doi: 10.1111/lam.13486.
2. Khan, M.Y.; Dirweesh, A.; Khurshid, T.; Siddiqui, W.J. Comparing fecal microbiota transplantation to standard-of-care treatment for recurrent Clostridium difficile infection: a systematic review and meta-analysis. *Eur. J. Gastroen. Hepat.* **2018**, *30*, 1309-1317, doi: 10.1097/MEG.0000000000001243.
3. Narula, N.; Kassam, Z.; Yuan, Y.; Colombel, J.; Ponsioen, C.; Reinisch, W.; Moayyedi, P. Systematic Review and Meta-analysis. *Inflamm. Bowel Dis.* **2017**, *23*, 1702-1709, doi: 10.1097/MIB.0000000000001228.
4. Shi, Y.; Dong, Y.; Huang, W.; Zhu, D.; Mao, H.; Su, P. Fecal Microbiota Transplantation for Ulcerative Colitis: A Systematic Review and Meta-Analysis. *PLoS One* **2016**, *11*, e157259, doi: 10.1371/journal.pone.0157259.
5. Liu, X.; Li, Y.; Wu, K.; Shi, Y.; Chen, M. Fecal Microbiota Transplantation as Therapy for Treatment of Active Ulcerative Colitis: A Systematic Review and Meta-Analysis. *Gastroent. Res. Pract.* **2021**, *2021*, 1-13, doi: 10.1155/2021/6612970.
6. Cold, F.; Baunwall, S.M.D.; Dahlerup, J.F.; Petersen, A.M.; Hvas, C.L.; Hansen, L.H. Systematic review with meta-analysis: encapsulated faecal microbiota transplantation – evidence for clinical efficacy. *Therapeutic Advances in Gastroenterology* **2021**, *14*, 1320557622, doi: 10.1177/17562848211041004.
7. Dang, X.; Xu, M.; Liu, D.; Zhou, D.; Yang, W. Assessing the efficacy and safety of fecal microbiota transplantation and probiotic VSL#3 for active ulcerative colitis: A systematic review and meta-analysis. *PLoS One* **2020**, *15*, e228846, doi: 10.1371/journal.pone.0228846.
8. Ianiro, G.; Eusebi, L.H.; Black, C.J.; Gasbarrini, A.; Cammarota, G.; Ford, A.C. Systematic review with meta-analysis: efficacy of faecal microbiota transplantation for the treatment of irritable bowel syndrome. *Aliment. Pharm. Ther.* **2019**, *50*, 240-248, doi: 10.1111/apt.15330.
9. Proença, I.M.; Allegretti, J.R.; Bernardo, W.M.; de Moura, D.T.H.; Ponte Neto, A.M.; Matsubayashi, C.O.; Flor, M.M.; Kotinda, A.P.S.T.; de Moura, E.G.H. Fecal microbiota transplantation improves metabolic syndrome parameters: systematic review with meta-analysis based on randomized clinical trials. *Nutr. Res.* **2020**, *83*, 1-14, doi: 10.1016/j.nutres.2020.06.018.

10. Caldeira, L.D.F.; Borba, H.H.; Tonin, F.S.; Wiens, A.; Fernandez-Llimos, F.; Pontarolo, R. Fecal microbiota transplantation in inflammatory bowel disease patients: A systematic review and meta-analysis. *PLoS One* **2020**, *15*, e238910, doi: 10.1371/journal.pone.0238910.
11. Tariq, R.; Furqan, F.; Pardi, D.; Khanna, S. 201 Efficacy of Fecal Microbiota Transplantation for Acute Graft Versus Host Disease in the Gut: A Systematic Review and Meta-Analysis. *Am. J. Gastroenterol.* **2019**, *114*, S123, doi: 10.14309/01.ajg.0000590336.17703.14.
