# Supplementary material for: Gastrointestinal Microbiome and Multiple Health Outcomes: Umbrella Review
Source: MDPI journal article supplement (doi:10.3390/nu14183726), 2022-09-09
Supplement: s1 [file s1]

|                                         |                                |    |         |      |                         |   |            |                     |          |                                                                                                                      |                                   |     |        |                                                                                                                                                                                                                                                        |  |  |
|-----------------------------------------|--------------------------------|----|---------|------|-------------------------|---|------------|---------------------|----------|----------------------------------------------------------------------------------------------------------------------|-----------------------------------|-----|--------|--------------------------------------------------------------------------------------------------------------------------------------------------------------------------------------------------------------------------------------------------------|--|--|
| immunoglobulin G                        | 0.33(0.21 to 0.45)             | 3  | 106/208 | 0.0  |                         |   |            |                     |          |                                                                                                                      |                                   |     |        | gastrointestinal function was normal or basically normal. Exclusion criteria were: patients with previous history of gastrointestinal and metabolic diseases, malignant tumor and malnutrition; patients with severe heart, liver, and kidney failure. |  |  |
| immunoglobulin M                        | 0.14(0.00 to 0.28)             | 4  | 147/290 | 46.0 |                         |   |            |                     |          |                                                                                                                      |                                   |     |        |                                                                                                                                                                                                                                                        |  |  |
| TC concentrations                       | -3.04(-4.88 to -1.21)mg/dL     | 12 | 767     | 45.9 | YAN 2019[3]             | S | probiotics | 6 weeks to 6 months | All RCTs | overweight or obesity was defined according to local standards                                                       | the probiotics vs. control groups | WMD | random | NP                                                                                                                                                                                                                                                     |  |  |
| LDL concentrations                      | -2.28(-3.60 to -0.96)mg/dL     | 11 | 737     | 36.9 |                         |   |            |                     |          |                                                                                                                      |                                   |     |        | fixed                                                                                                                                                                                                                                                  |  |  |
| HDL concentrations                      | -0.26(-2.39 to 1.87)mg/dL*     | 12 | 767     | 95.5 |                         |   |            |                     |          |                                                                                                                      |                                   |     |        | random                                                                                                                                                                                                                                                 |  |  |
| TG concentrations                       | -0.86(-2.54 to 0.83)17.0mg/dL* | 11 | 726     | 17.0 |                         |   |            |                     |          |                                                                                                                      |                                   |     |        | fixed                                                                                                                                                                                                                                                  |  |  |
| TC concentrations                       | -1.23(-3.52 to 1.06)mg/dL*     | 5  | NP      | 0.0  |                         |   |            |                     |          |                                                                                                                      |                                   |     |        | fixed                                                                                                                                                                                                                                                  |  |  |
| TC concentrations                       | -3.82(-6.14 to -1.50)mg/dL     | 7  |         | 49.8 |                         |   |            |                     |          |                                                                                                                      |                                   |     |        | fixed                                                                                                                                                                                                                                                  |  |  |
| TG concentrations                       | 9.10(1.38 to 16.81)mg/dL       | 4  |         | 0.0  |                         |   |            |                     |          |                                                                                                                      |                                   |     |        | fixed                                                                                                                                                                                                                                                  |  |  |
| TG concentrations                       | -1.36(-3.08 to 0.37)mg/dL*     | 7  |         | 0.0  |                         |   |            |                     |          |                                                                                                                      |                                   |     |        | fixed                                                                                                                                                                                                                                                  |  |  |
| Effects on Fasting Plasma Glucose (FPG) | -0.35 (-0.67 to -0.02)         | 6  | 215/436 | 64.0 | WANG 2019[4]            | Z | Probiotics | NP                  | All RCTs | adults (≥18 years old) individuals with a BMI > 25 kg m-2                                                            | the probiotics vs. control groups | SMD | random | 0.791                                                                                                                                                                                                                                                  |  |  |
| Effects on C-reactive protein (CRP)     | -0.45 (-0.99 to 0.08 ) mg/L*   | 9  | 314/649 | 84.0 | PONTES K S D S 2021 [5] | S | probiotics | NP                  | All RCTs | adults (18 years or older) with overweight or obesity defined according to local standards for body mass index (BMI) | Probiotics versus placebo         | MD  | random | No serious bias                                                                                                                                                                                                                                        |  |  |
| Effects on tumor necrosis factor α      | -0.16 (-0.24 to -0.08 ) pg/ml  | 4  | 96/191  | 11.0 |                         |   |            |                     |          |                                                                                                                      |                                   |     |        |                                                                                                                                                                                                                                                        |  |  |
| Effects on interleukin-6                | 0.05 (-0.28 to 0.39 ) pg/ml*   | 3  | 66/142  | 57.0 |                         |   |            |                     |          |                                                                                                                      |                                   |     |        |                                                                                                                                                                                                                                                        |  |  |
| Effects on glucose                      | -0.07 (-0.26 to 0.13 )         | 13 | 418/977 | 92.0 |                         |   |            |                     |          |                                                                                                                      |                                   |     |        |                                                                                                                                                                                                                                                        |  |  |

[illegible]



|                                                 |                               |    |     |      |                                |                                                                            |                                                        |          |                                                                                                                                   |                              |     |        |                 |
|-------------------------------------------------|-------------------------------|----|-----|------|--------------------------------|----------------------------------------------------------------------------|--------------------------------------------------------|----------|-----------------------------------------------------------------------------------------------------------------------------------|------------------------------|-----|--------|-----------------|
| serum ALP level                                 | -0.27 (-4.00 to 3.47)IU/L*    | 6  | 518 | 70.0 | HERNANDEZ-SAAVEDRA D 2018 [13] | Any prebiotic or probiotic treatment, or a combination of both (synbiotic) | NP                                                     | All RCTs | Male and female patients of any age that presented at least 1 of the following: NAFLD, steatosis, liver fibrosis, steatohepatitis | Vs. placebo                  | MD  | random | No serious bias |
| serum GGT levels: gamma-glutamyl transpeptidase | -8.40 (-12.61 to -4.20)IU/L   | 8  | 438 | 53.0 |                                |                                                                            |                                                        |          |                                                                                                                                   |                              |     |        |                 |
| serum levels of albumin                         | -0.29 ( -0.74 to 0.16)*       | 11 | 662 | 40.0 |                                |                                                                            |                                                        |          |                                                                                                                                   |                              |     |        |                 |
| serum bilirubin level                           | 0.95 (0.48 to 1.42)μmol/L     | 13 | 806 | 4.0  |                                |                                                                            |                                                        |          |                                                                                                                                   |                              |     |        |                 |
| ALT                                             | -7.31 (-9.89 to -4.74) U/L    | 27 | NP  | 98.4 |                                |                                                                            |                                                        |          |                                                                                                                                   |                              |     |        |                 |
| AST                                             | -4.94 (-6.89 to -2.98) U/L    | 25 |     | 98.8 |                                |                                                                            |                                                        |          |                                                                                                                                   |                              |     |        |                 |
| γ-GT: gamma-glutamyl transferase                | -7.86 (-11.36 to -4.36) U/L   | 9  |     | 94.8 |                                |                                                                            |                                                        |          |                                                                                                                                   |                              |     |        |                 |
| TNF-α                                           | -2.04 (-4.70 to 0.61) ng/mL*  | 6  |     | 99.7 |                                |                                                                            |                                                        |          |                                                                                                                                   |                              |     |        |                 |
| hepatic cytokine CRP                            | -0.74 (-1.85 to 0.37) mg/L*   | 6  |     | 99.3 |                                |                                                                            |                                                        |          |                                                                                                                                   |                              |     |        |                 |
| total serum cholesterol                         | -7.97 (-11.41 to -4.54) mg/dL | 15 |     | 99.3 |                                |                                                                            |                                                        |          |                                                                                                                                   |                              |     |        |                 |
| Serum LDL-c                                     | -3.81 (-8.31 to 0.69) mg/dL*  | 12 |     | 97.0 | KHAN M Y 2019[14]              | probiotics and/or synbiotics                                               | NP                                                     | All RCTs | adult patients older than 18 years of age with NAFLD or NASH                                                                      | Vs. placebo                  | SMD | random | NP              |
| HDL-c                                           | 0.56 (-1.55 to 2.67)*         | 12 |     | 99.8 |                                |                                                                            |                                                        |          |                                                                                                                                   |                              |     |        |                 |
| Circulating TAG                                 | -8.28 (-16.35 to -0.22)       | 16 |     | 97.8 |                                |                                                                            |                                                        |          |                                                                                                                                   |                              |     |        |                 |
| necrosis factor-α                               | -0.59 (-1.34 to 0.16)*        | 6  | 276 | 88.0 |                                |                                                                            |                                                        |          |                                                                                                                                   |                              |     |        |                 |
| LDL                                             | -0.48 (-1.04 to -0.08)        | 7  | 316 | 82.0 |                                |                                                                            |                                                        |          |                                                                                                                                   |                              |     |        |                 |
| HDL                                             | -0.03 (-0.29 to 0.23)*        | 7  | 316 | 24.0 |                                |                                                                            |                                                        |          |                                                                                                                                   |                              |     |        |                 |
| total cholesterol level.                        | -0.48 (-0.94 to -0.01)        | 8  | 391 | 79.0 |                                |                                                                            |                                                        |          |                                                                                                                                   |                              |     |        |                 |
| triglycerides level.                            | -0.23 (-0.48 to 0.03)*        | 8  | 391 | 36.0 |                                |                                                                            |                                                        |          |                                                                                                                                   |                              |     |        |                 |
| insulin resistance                              | -0.12 (-0.63 to 0.40)*        | 6  | 289 | 93.0 |                                |                                                                            |                                                        |          |                                                                                                                                   |                              |     |        |                 |
| fasting blood sugar level                       | -0.47 (-1.02 to 0.08)*        | 6  | 305 | 81.0 |                                |                                                                            |                                                        |          |                                                                                                                                   |                              |     |        |                 |
| high-sensitivity C-reactive protein level       | -0.45 (-0.76 to -0.15)        | 4  | 234 | 25.0 | SKONIECZNA-ZYDECKA K 2018 [15] | treatment with pro-/pre-/synbiotics                                        | Preoperation 0-15 days, postoperation 0-until discharg | All RCTs | surgical patients                                                                                                                 | Probiotics vs. No probiotics | SMD | random | NP              |
| CRP                                             | -0.40 (-0.79 to -0.02)        | 6  | NP  |      |                                |                                                                            |                                                        |          |                                                                                                                                   |                              |     |        |                 |
| IL-6                                            | -0.41 (-0.70 o -0.12)         | 4  |     |      |                                |                                                                            |                                                        |          |                                                                                                                                   |                              |     |        |                 |
| white blood cells (WBC)                         | -0.60 (-1.45 to 0.24)*        | 6  |     |      |                                |                                                                            |                                                        |          |                                                                                                                                   |                              |     |        |                 |
| lactulose/mannitol (L/M) ratio                  | -0.28 (-0.82 to 0.27)*        | 4  |     |      |                                |                                                                            |                                                        |          |                                                                                                                                   |                              |     |        |                 |

|                                        |                              |    |      |      |                      |                                    |                       |                                                                             |                                                                                                                          |                                         |        |        |                 |  |
|----------------------------------------|------------------------------|----|------|------|----------------------|------------------------------------|-----------------------|-----------------------------------------------------------------------------|--------------------------------------------------------------------------------------------------------------------------|-----------------------------------------|--------|--------|-----------------|--|
| the concentration of butyrate ratio    | 0.67 (0.37 to 0.97)          | 4  |      |      |                      |                                    |                       | e                                                                           |                                                                                                                          |                                         |        |        |                 |  |
| short chain fatty acids (SCFAs)-acetic | 1.78 (0.80 to 2.76)          | 4  |      |      |                      |                                    |                       |                                                                             |                                                                                                                          |                                         |        |        |                 |  |
| propionic acids                        | 0.46 (0.18 to 0.73)          | 4  |      |      |                      |                                    |                       |                                                                             |                                                                                                                          |                                         |        |        |                 |  |
| hs-CRP                                 | -0.39 (-0.50 to -0.28)       | 31 | NP   | 83.8 | MILAJERDI A 2020[16] | probiotic                          | NP                    | All RCTs                                                                    | adult                                                                                                                    | probiotics vs. placebo                  | SMD    | fixed  | NP              |  |
| serum IL-6                             | -0.37 (-0.51 to -0.24)       | 16 |      | 69.7 |                      |                                    |                       |                                                                             |                                                                                                                          |                                         |        |        |                 |  |
| serum concentrations                   | TNF-a -0.21 (-0.34 to -0.08) | 18 |      | 85.5 |                      |                                    |                       |                                                                             |                                                                                                                          |                                         |        |        |                 |  |
| serum Interleukin-10 (IL-10)           | 0.21 (0.04 to 0.38)          | 11 |      | 48.5 |                      |                                    |                       |                                                                             |                                                                                                                          |                                         |        |        |                 |  |
| serum interleukin-1 beta (IL-1β)       | -0.17 (-0.37 to 0.02)*       | 9  |      | 80.7 |                      |                                    |                       |                                                                             |                                                                                                                          |                                         |        |        |                 |  |
| serum IL-12                            | -0.47 (-0.67 to -0.27)       | 8  |      | 85.2 |                      |                                    |                       |                                                                             |                                                                                                                          |                                         |        |        |                 |  |
| serum IL-8                             | -0.01 (-0.30 to 0.28)*       | 5  |      | 73.0 |                      |                                    |                       |                                                                             |                                                                                                                          |                                         |        |        |                 |  |
| Interferon-gama (IFN-γ)                | -0.08 (-0.31 to 0.15)*       | 5  |      | 0.0  |                      |                                    |                       |                                                                             |                                                                                                                          |                                         |        |        |                 |  |
| IL-17                                  | 0.06 (-0.34 to 0.46)*        | 3  |      | 0.0  |                      |                                    |                       |                                                                             |                                                                                                                          |                                         |        |        |                 |  |
| IL-4                                   | -0.48 (-0.76 to -0.20)       | 3  |      | 0.0  |                      |                                    |                       |                                                                             |                                                                                                                          |                                         |        |        |                 |  |
| CRP                                    | -0.77 (-1.48 to -0.05) mg/L  | 4  | 153  | 75.0 | PAN H D 2017[17]     | probiotic                          | Follow up: 8-48 weeks | All RCTs                                                                    | patients with a clear diagnosis of RA and stable treatment of disease-modifying anti-rheumatic drugs (DMARDs)            | probiotics vs. Placebo or no probiotics | SMD MD | random | NP              |  |
| TNF-α                                  | -1.35 (-1.99 to -0.71)       | 3  | 118  | 25.0 |                      |                                    |                       |                                                                             |                                                                                                                          |                                         |        |        |                 |  |
| IL-6                                   | -8.69 (-27.32 to 9.94)*      | 3  | 118  | 62.0 |                      |                                    |                       |                                                                             |                                                                                                                          |                                         |        |        |                 |  |
| IL-1β                                  | -6.13 (-11.41 to -0.86)      | 3  | 118  | 50.0 |                      |                                    |                       |                                                                             |                                                                                                                          |                                         |        |        |                 |  |
| IL-10.                                 | 0.63 (-0.05 to 1.31)*        | 3  | 118  | 45.0 |                      |                                    |                       |                                                                             |                                                                                                                          |                                         |        |        |                 |  |
| CD4 counts                             | 3.86 (-24.72 to 32.45) *     | 16 | 1025 | 55.7 | FU Y S 2020[18]      | probiotics, prebiotics, synbiotics | NP                    | All RCTs                                                                    | HIV-1-infected adults over 18 years of age                                                                               | Vs. placebo or control groups           | WMD    | random | 0.936           |  |
| CD4 counts                             | 21.24 (-12.95 to 55.39)*     | 10 | 385  | 0.0  | ZHANG X L 2021[19]   | probiotic                          | 2-48 weeks            | RCTs, clinical cohort studies, pilot study with controls, or other clinical | HIV/AIDS patients and patients diagnosed with similar recognized criteria based on laboratory evidence or methods of HIV | Probiotic vs. No probiotic              | MD     | fixed  | No serious bias |  |

[illegible]

|                          |                             |   |     |      |                          |                                                                                                                                                                                                        |                               |                       |                                                                              |                                       |                           |         |         |    |  |  |       |
|--------------------------|-----------------------------|---|-----|------|--------------------------|--------------------------------------------------------------------------------------------------------------------------------------------------------------------------------------------------------|-------------------------------|-----------------------|------------------------------------------------------------------------------|---------------------------------------|---------------------------|---------|---------|----|--|--|-------|
|                          |                             |   |     |      |                          |                                                                                                                                                                                                        |                               |                       |                                                                              |                                       |                           |         |         |    |  |  | 8     |
| TAC                      | 0.08 (-0.16 to -0.32)       | 5 | 268 | 0.0  |                          |                                                                                                                                                                                                        |                               |                       |                                                                              |                                       |                           |         |         |    |  |  | 0.286 |
| HOMA-IR                  | -0.71 (-1.05 to -0.37)      | 4 | 222 | 0.0  | WMD                      |                                                                                                                                                                                                        |                               |                       |                                                                              |                                       |                           |         |         |    |  |  | 0.133 |
| HOMA-β                   | -15.18 (-22.08 to -8.28)    | 3 | 174 | 0.0  |                          |                                                                                                                                                                                                        |                               |                       |                                                                              |                                       |                           |         |         |    |  |  | 0.096 |
| serum creatinine         | 0.08 (-0.13 to 0.28) mg/dL* | 5 | 126 | 0.0  | JIA L P 2018[22]         | probiotics                                                                                                                                                                                             | 1-6 momths                    | All RCTs              | adult kidney disease (CKD) patients                                          | chronic disease                       | probiotics vs controls    | MD      | rando m | NP |  |  |       |
| blood urea               | -1.38 (-9.26 to 6.50)*      | 3 | 164 | 0.0  |                          |                                                                                                                                                                                                        |                               |                       |                                                                              |                                       |                           |         |         |    |  |  |       |
| p-cresyl sulfate         | -0.57 (-0.99 to -0.14)      | 3 | 125 | 25.0 |                          |                                                                                                                                                                                                        |                               |                       |                                                                              |                                       |                           |         |         |    |  |  |       |
| hemoglobin               | 0.21 (-0.48 to 0.91)*       | 3 | 93  | 20.0 |                          |                                                                                                                                                                                                        |                               |                       |                                                                              |                                       |                           |         |         |    |  |  |       |
| IL-6                     | 0.37 (0.03 to 0.72)*        | 3 | 134 | 0.0  |                          |                                                                                                                                                                                                        |                               |                       |                                                                              |                                       |                           |         |         |    |  |  |       |
| CRP                      | 0.49 (-6.45 to 3.11)*       | 3 | NP  | 28.0 | SMD                      |                                                                                                                                                                                                        |                               |                       |                                                                              |                                       |                           |         |         |    |  |  |       |
| urea                     | -8.17 (-24.57 to 8.23)*     | 6 | 259 | 73.0 | TAO S 2019 [23]          | probiotics (specified probiotic or probiotic mixes) in any form (e.g., capsule, tablet or other food supplements or components), the probiotics could be administered at any dose and for any duration | Follow up: 6 weeks - 6 months | All RCTs              | the participants were diagnosed with CKD, whether undergoing dialysis or not | probiotics vs placebo                 | MD                        | rando m | 0.293   |    |  |  |       |
| uric acid                | -0.43 (-1.19 to 0.33)*      | 3 | 131 | 67.0 |                          |                                                                                                                                                                                                        |                               |                       |                                                                              |                                       |                           |         |         |    |  |  |       |
| C-reactive protein       | -0.48 (-1.29 to 0.33)*      | 6 | 227 | 52.0 |                          |                                                                                                                                                                                                        |                               |                       |                                                                              |                                       |                           |         |         |    |  |  |       |
| creatinine               | -0.18 (-0.82 to 0.47)       | 6 | 259 | 69.0 |                          |                                                                                                                                                                                                        |                               |                       |                                                                              |                                       |                           |         |         |    |  |  |       |
| serum C-reactive protein | -0.37 (-0.72 to 0.03)*      | 7 | 178 | 0.0  | THONGPRA YOON C 2019[24] | probiotic                                                                                                                                                                                              | NP                            | clinical trials       | end-stage renal disease (ESRD) patients                                      | Vs. Control group                     | SMD                       | rando m | 0.09    |    |  |  |       |
| total cholesterol        | -0.25 (-0.46 to -0.04)      | 7 | NP  | 0.0  | BAKHTIARY M 2021 [25]    | probiotic, prebiotic, synbiotic                                                                                                                                                                        | or                            | Follow up: 4-12 weeks | All RCTs                                                                     | chronic kidney disease (CKD) patients | Vs. usual care or placebo | SMD     | rando m | NP |  |  |       |
| HDL levels               | -0.01 (-0.62 to 0.60)*      | 6 |     | 84.6 |                          |                                                                                                                                                                                                        |                               |                       |                                                                              |                                       |                           |         |         |    |  |  |       |
| LDL                      | -0.19 (-0.49 to 0.10)*      | 6 |     | 45.8 |                          |                                                                                                                                                                                                        |                               |                       |                                                                              |                                       |                           |         |         |    |  |  |       |
| triglyceride             | -0.10 (-0.33 to 0.12)*      | 7 |     | 6.1  |                          |                                                                                                                                                                                                        |                               |                       |                                                                              |                                       |                           |         |         |    |  |  |       |
| VLDL                     | -0.21 (-0.47 to 0.05)*      | 4 |     | 0.0  |                          |                                                                                                                                                                                                        |                               |                       |                                                                              |                                       |                           |         |         |    |  |  |       |
| Fasting blood glucose    | -0.41 (-0.65 to -0.17)      | 5 |     | 0.0  |                          |                                                                                                                                                                                                        |                               |                       |                                                                              |                                       |                           |         |         |    |  |  |       |



[illegible]

[illegible]

|                                                                                        |                                 |                     |           |         |                            |                                                                                                                      |                    |                                                                           |                                                                                                                |                                       |     |        |                 |                           |
|----------------------------------------------------------------------------------------|---------------------------------|---------------------|-----------|---------|----------------------------|----------------------------------------------------------------------------------------------------------------------|--------------------|---------------------------------------------------------------------------|----------------------------------------------------------------------------------------------------------------|---------------------------------------|-----|--------|-----------------|---------------------------|
| CRP                                                                                    | -0.60 (-0.98 to -0.23)          | 7                   | 342       | 64.0    | MCLOUGHLIN R F 2017[34]    | prebiotics, delivered orally, intravenously, or perrectum (enema)                                                    | 2-12 weeks         | All RCTs                                                                  | human participants of any age and sex                                                                          | vs. placebo or control                | SMD | random | NP              |                           |
| IL-6                                                                                   | 0.35 (-0.84 to 0.13)*           | 6                   | 313       | 75.0    |                            |                                                                                                                      |                    |                                                                           |                                                                                                                |                                       |     |        |                 |                           |
| TNF- $\alpha$                                                                          | -0.49 (-1.20 to 0.22)*          | 4                   | 219       | 84.0    |                            |                                                                                                                      |                    |                                                                           |                                                                                                                |                                       |     |        |                 |                           |
| postprandial ghrelin                                                                   | -71.66 (-148.83 to 5.50) pg/ml* | 3                   | NP        | 84.6    | DA SILVA BORGES D 2020[35] | prebiotic or synbiotic                                                                                               | NP                 | clinical trials                                                           | overweight or obesity diagnosis (BMI $\geq$ 25 kg/m <sup>2</sup> ), (3) adults and older adults ( $\geq$ 18 y) | Vs. control                           | WMD | random | NP              |                           |
| levels of TNF- $\alpha$                                                                | -0.24 (-0.69 to 0.21)*          | 7                   | NP        | 82.7    | QU H 2019[36]              | microbiota-driven therapy (probiotic, prebiotic or symbiotic)                                                        | 14-180 days        | the study described a randomized, controlled, parallel or crossover trial | healthy elderly individuals with age>60 years                                                                  | vs. placebo                           | SMD | random | 0.37            |                           |
| IL-6                                                                                   | -0.13 (-0.74 to 0.49)*          | 6                   |           | 90.7    |                            |                                                                                                                      |                    |                                                                           |                                                                                                                |                                       |     |        |                 | 0.26                      |
| IL-10                                                                                  | 1.00 (-0.15 to 2.15)*           | 6                   |           | 96.3    |                            |                                                                                                                      |                    |                                                                           |                                                                                                                |                                       |     |        |                 | 0.20                      |
| CRP                                                                                    | -1.28 (-2.62 to 0.06)*          | 4                   |           | 96.2    |                            |                                                                                                                      |                    |                                                                           |                                                                                                                |                                       |     |        |                 | NP                        |
| IL-8                                                                                   | -0.03 (-0.67 to 0.61)*          | 4                   |           | 88.0    |                            |                                                                                                                      |                    |                                                                           |                                                                                                                |                                       |     |        |                 |                           |
| CRP                                                                                    | 0.02 (-0.32 to 0.36)*           | 3                   | 135       | 0.0     | ZHU H F 2020[37]           | treated with microecological preparations (probiotics, prebiotics, synbiotics, or a combination of two preparations) | 15 days to 6months | All RCTs                                                                  | obese adults (age $\geq$ 18 years) who had undergone bariatric surgery (a type of surgery was not restricted)  | Vs. placebo or conventional treatment | SMD | Random | NP              |                           |
| IL-6                                                                                   | -0.10 (-0.81 to 0.61)*          | 3                   | 135       | 0.0     |                            |                                                                                                                      |                    |                                                                           |                                                                                                                |                                       |     | random |                 |                           |
| TNF- $\alpha$                                                                          | -0.29 (-0.64 to 0.05)*          | 3                   | 135       | 0.0     |                            |                                                                                                                      |                    |                                                                           |                                                                                                                |                                       |     | fixed  |                 |                           |
| Gastrointestinal outcome                                                               |                                 |                     |           |         |                            |                                                                                                                      |                    |                                                                           |                                                                                                                |                                       |     |        |                 |                           |
| Incidence of C. difficile-associated diarrhea                                          | 0.4 (0.3 to 0.52)               | 31                  | 4525/8672 | 0.0     | GOLDENBERG J Z 2017[38]    | probiotics                                                                                                           | NP                 | All RCTs                                                                  | participants taking antibiotics                                                                                | any versus none                       | RR  | random | No serious bias |                           |
| Antibiotic-associated diarrhea                                                         | 0.58 (0.48 to 0.70)             | 33                  | 8870      | 61.0    |                            |                                                                                                                      |                    |                                                                           |                                                                                                                |                                       |     |        |                 |                           |
| the occurrence of diarrhea and positive stool C . difficile cytotoxin assay or culture | 0.38 (0.22 to 0.67)             | 6                   | 597/1194  | 39.0    | WU Z J 2013[39]            | Lactobacillus                                                                                                        | NP                 | All RCTs                                                                  | With or without antibiotics                                                                                    | any versus none                       | RR  | fixed  | NA              |                           |
|                                                                                        |                                 | 0.63(0.31 to 1.28)* | 4         | 431/861 |                            | 0.0                                                                                                                  |                    |                                                                           |                                                                                                                |                                       |     |        |                 | Lactobacillus acidophilus |
| incidence of CDI (diarrhea and either positive stool                                   | 0.42(0.3 to 0.57)               | 19                  | 6261      | 0.0     | SHEN N T                   | probiotics                                                                                                           | NP                 | All RCTs                                                                  | Hospitalized adults (18 years                                                                                  | any versus                            | RR  | random | No serio        |                           |

|                                                                                 |                       |    |         |      |                          |   |                                                                                                                                 |                     |          |                                                                                                                                                                                             |                                                                                               |    |            |                           |            |
|---------------------------------------------------------------------------------|-----------------------|----|---------|------|--------------------------|---|---------------------------------------------------------------------------------------------------------------------------------|---------------------|----------|---------------------------------------------------------------------------------------------------------------------------------------------------------------------------------------------|-----------------------------------------------------------------------------------------------|----|------------|---------------------------|------------|
| cytotoxin, culture, or<br>polymerase chain reaction<br>testing for C difficile) |                       |    |         |      | 2017[40]                 |   |                                                                                                                                 |                     |          |                                                                                                                                                                                             | or<br>receiving<br>antibiotic<br>therapy<br>(intravenous,<br>oral, or both) for<br>any reason |    |            |                           | us<br>bias |
|                                                                                 | 0.32 (0.22 to 0.48)   | 14 | NP      | 0.0  |                          |   | Timing: study<br>protocol<br>specifying<br>maximum interval<br>from starting<br>antibiotics to<br>starting probiotics,<br>1-2 d |                     |          |                                                                                                                                                                                             |                                                                                               |    |            |                           | NP         |
|                                                                                 | 0.7 (0.4 to 1.23)*    | 5  | NP      | 0.0  |                          |   | Timing: study<br>protocol<br>specifying<br>maximum interval<br>from starting<br>antibiotics to<br>starting probiotics,<br>3-7 d |                     |          |                                                                                                                                                                                             |                                                                                               |    |            |                           | NP         |
|                                                                                 | 0.73 (0.29 to 1.88)*  | 3  | NP      | 0.0  |                          |   | L rhamnosus GG                                                                                                                  |                     |          |                                                                                                                                                                                             |                                                                                               |    |            |                           | NP         |
|                                                                                 | 0.63 (0.29 to 1.37)*  | 5  | NP      | 0.0  |                          |   | S boulardii                                                                                                                     |                     |          |                                                                                                                                                                                             |                                                                                               |    |            |                           | NP         |
| Incidence of Clostridium<br>difficile-associated<br>diarrhea(CDAD)              | 0.34(0.24 to 0.49)    | 20 | 40/1974 | 0.0  | JOHNSTON<br>B C 2012[41] |   | any dose of a<br>specified probiotic<br>of any strain                                                                           | NP                  | All RCTs | adult<br>pediatric<br>patients treated<br>with antibiotics                                                                                                                                  | or<br>any versus<br>none                                                                      | RR | rando<br>m | No<br>serio<br>us<br>bias |            |
| clinical remission                                                              | 2.40(1.49 to 3.88)    | 3  | 71/162  | 29.0 | DANG<br>2020[42]         | X | probiotic VSL#3 as<br>induction therapy                                                                                         | 6-12wee<br>ks       | All RCTs | patients<br>active UC                                                                                                                                                                       | with<br>any versus<br>none                                                                    | OR | Fixed      | 1.34                      |            |
| clinical response                                                               | 3.09(1.53 to 6.25)    | 3  | 89/162  | 46.0 |                          |   |                                                                                                                                 |                     |          |                                                                                                                                                                                             |                                                                                               |    | Rando<br>m | 0.47                      |            |
| Clinical remission                                                              | 1.73(1.19 to 2.54)    | 9  | 594     | 55.0 | KAUR<br>2020[43]         | L | Probiotics                                                                                                                      | NP                  | All RCTs | People of any<br>age with active<br>ulcerative colitis<br>previously<br>diagnosed by<br>clinical,<br>endoscopic,<br>histologic or<br>surgical<br>remissionas<br>defined by study<br>authors | any versus<br>placebo                                                                         | RR | Rando<br>m | NP                        |            |
|                                                                                 | 2.02(1.31 to 3.12)    | 5  | 374     | 32.0 |                          |   |                                                                                                                                 |                     |          |                                                                                                                                                                                             | probiotics<br>with<br>multiple<br>strains<br>versus<br>placebo                                |    |            |                           |            |
|                                                                                 | 1.44(0.79 to 2.63)    | 4  | 220     | 57.0 |                          |   |                                                                                                                                 |                     |          |                                                                                                                                                                                             | probiotics<br>with single<br>strain<br>versus<br>placebo                                      |    |            |                           |            |
| improvement in colon<br>endoscopic scores                                       | -0.58(-1.11 to -0.05) | 3  | 93      | 85.0 | RUFINO<br>N 2021[44]     | M | Synbiotic<br>treatment                                                                                                          | 4weeks<br>to 1 year | All RCTs | Human patients<br>with ulcerative                                                                                                                                                           | convention<br>al plus a<br>synbiotic                                                          | RR | Fixed      | NP                        |            |

|                |                    |    |      |      |                       |                                                                                              |               |          |                                                                     |                                                                     |                                                                                                                                                                                |    |       |           |  |
|----------------|--------------------|----|------|------|-----------------------|----------------------------------------------------------------------------------------------|---------------|----------|---------------------------------------------------------------------|---------------------------------------------------------------------|--------------------------------------------------------------------------------------------------------------------------------------------------------------------------------|----|-------|-----------|--|
|                |                    |    |      |      |                       |                                                                                              |               |          |                                                                     | colitis                                                             | or<br>synbiotic<br>treatment<br>alone<br>versus<br>convention<br>al plus<br>placebo or<br>placebo<br>treatment<br>alone                                                        |    |       |           |  |
| remission rate | 1.40(1.27 to 1.53) | 27 | 1942 | 0.0  | PENG L J<br>2019 [45] | probiotics<br>in conjunction<br>with mesalazine<br>or sulfasalazine<br>or aminosalic<br>acid | 4-12<br>weeks | All RCTs | children<br>or adults with<br>UC regardless<br>of clinical setting  | children<br>or adults with<br>UC in both mild<br>to moderate stages | probiotics<br>in conjunction<br>with mesalazine<br>or sulfasalazine<br>or aminosalic<br>acid versus<br>mesalazine<br>or sulfasalazine<br>or aminosalyi<br>cyclic acid<br>alone | RR | Fixed | 0.00<br>0 |  |
|                | 1.33(1.16 to 1.54) | 11 | NP   | 33.4 |                       |                                                                                              |               |          | children<br>or adults with<br>UC in both mild<br>to moderate stages | children<br>or adults with<br>UC in active stage                    |                                                                                                                                                                                |    |       |           |  |
|                | 1.40(1.27 to 1.64) | 16 | NP   | 0.0  |                       |                                                                                              |               |          | children<br>or adults with<br>UC in active stage                    | children<br>or adults with<br>UC in active stage                    |                                                                                                                                                                                |    |       |           |  |
|                | 1.36(1.20 to 1.53) | 17 | NP   | 19.5 |                       |                                                                                              |               |          | children<br>or adults with<br>UC regardless<br>of clinical setting  | children<br>or adults with<br>UC regardless<br>of clinical setting  |                                                                                                                                                                                |    |       |           |  |
|                | 1.45(1.24 to 1.70) | 8  | NP   | 0.0  |                       |                                                                                              |               |          |                                                                     |                                                                     | probiotics<br>combined<br>with<br>aminosalic<br>ylic acid on<br>UC in 3<br>types of<br>protiotics                                                                              |    |       |           |  |
|                | 1.40(1.27 to 1.64) | 2  | NP   | 0.0  |                       |                                                                                              |               |          |                                                                     |                                                                     | probiotics<br>combined<br>with<br>aminosalic<br>ylic acid on<br>UC in 2<br>types of<br>protiotics                                                                              |    |       |           |  |

|                                                                                                                                                   |                     |   |     |      |                             |                                                                                                                                |             |          |                                                        |                                                                        |                                                    |        |                 |  |
|---------------------------------------------------------------------------------------------------------------------------------------------------|---------------------|---|-----|------|-----------------------------|--------------------------------------------------------------------------------------------------------------------------------|-------------|----------|--------------------------------------------------------|------------------------------------------------------------------------|----------------------------------------------------|--------|-----------------|--|
|                                                                                                                                                   |                     |   |     |      |                             |                                                                                                                                |             |          |                                                        |                                                                        | aminosalicylic acid on UC in 1 types of protiotics |        |                 |  |
| the efficacy of EcN in inducing remission for ulcerative colitis                                                                                  | 0.92(0.15 to 5.66)* | 3 | 267 | 86.0 | LOSURDO G 2015[46]          | Escherichia coli Nissle ( EcN) 1917                                                                                            | NP          | All RCTs | Patients with UC                                       | EcN versus standard of care (mesalazine or ciprofloxacin)              | OR                                                 | Fixed  | No serious bias |  |
| Maintenance of remission                                                                                                                          | 1.07(0.70 to 1.64)* | 4 | 442 | 0.0  |                             |                                                                                                                                |             |          |                                                        | Regimen or placebo                                                     |                                                    |        |                 |  |
|                                                                                                                                                   |                     |   |     |      |                             |                                                                                                                                |             |          |                                                        | EcN versus standard of care (mesalazine)                               |                                                    |        |                 |  |
| Clinical relapse                                                                                                                                  | 0.87(0.63 to 1.18)* | 4 | 361 | 17.0 | IHEOZOR-EJ IOFOR Z 2020[47] | Probiotics administered in any form (drink, powder, capsule), orally as a single species, or as a cocktail of multiple species | 12-52 weeks | All RCTs | People of any age with ulcerative colitis in remission | Probiotics versus placebo                                              | RR                                                 | Random | NP              |  |
| Maintenance of clinical remission                                                                                                                 | 1.16(0.98 to 1.37)* | 2 | 141 | 0.0  |                             |                                                                                                                                |             |          |                                                        |                                                                        |                                                    |        |                 |  |
| Clinical relapse                                                                                                                                  | 1.01(0.84 to 1.22)* | 2 | 452 | 0.0  |                             |                                                                                                                                |             |          |                                                        | Probiotics versus 5-aminosalicylic acid (5-ASA) (mesalazine)           |                                                    |        |                 |  |
| Maintenance of clinical remission                                                                                                                 | 1.06(0.90 to 1.25)* | 1 | 125 | NP   |                             |                                                                                                                                |             |          |                                                        | Probiotic + 5-ASA (mesalazine) versus 5-ASA (mesalazine)               |                                                    |        |                 |  |
| Clinical relapse                                                                                                                                  | 1.11(0.66 to 1.84)* | 2 | 242 | 14.7 |                             |                                                                                                                                |             |          |                                                        |                                                                        |                                                    |        |                 |  |
| Maintenance of clinical remission                                                                                                                 | 1.05(0.89 to 1.24)* | 1 | 122 | NP   |                             |                                                                                                                                |             |          |                                                        |                                                                        |                                                    |        |                 |  |
| remission in active UC patients, assessed with the Ulcerative Colitis Disease Activity Index (UCDAI) and Disease Activity Index (DAI)/Mayo scores | 1.55(1.13 to 2.15)  | 6 | 503 | 29.0 | ASTO 2019[48]               | E probiotic, prebiotic, inulin, fructo-oligosaccharides, FOS, and synbiotic                                                    | NP          | All RCTs | adults or children with active UC                      | administration (oral or rectal) of probiotics versus placebo or active | RR                                                 | random | NP              |  |
| Efficacy of                                                                                                                                       | 1.73(1.23 to 2.43)  | 6 | 424 | 35.0 |                             | bifidobacteria-con                                                                                                             |             |          |                                                        |                                                                        |                                                    |        |                 |  |

|                                                 |                     |    |            |      |                     |                                                                            |                    |                    |          |                                                        |                                                                   |    |        |                 |  |  |                                                              |
|-------------------------------------------------|---------------------|----|------------|------|---------------------|----------------------------------------------------------------------------|--------------------|--------------------|----------|--------------------------------------------------------|-------------------------------------------------------------------|----|--------|-----------------|--|--|--------------------------------------------------------------|
| inducing/maintaining remission                  | 1.04(0.35 to 3.06)* | 3  | 168        | 78.0 |                     | taining probiotics                                                         |                    |                    |          |                                                        |                                                                   |    |        |                 |  |  | treatment of UC to induce remission or to maintain remission |
|                                                 | 1.99(1.25 to 3.15)  | 4  | 348        | 49.0 |                     | Probiotics without bifidobacteria                                          |                    |                    |          |                                                        |                                                                   |    |        |                 |  |  |                                                              |
|                                                 | 1.38(0.86 to 2.21)* | 4  | 313        | 56.0 |                     | VSL#3                                                                      |                    |                    |          |                                                        |                                                                   |    |        |                 |  |  |                                                              |
|                                                 |                     |    |            |      |                     | probiotic, prebiotic, inulin, fructo-oligosaccharides, FOS, and synbiotic  |                    |                    |          |                                                        | adults or children with inactive UC                               |    |        |                 |  |  |                                                              |
| Efficacy of Probiotics at Maintaining Remission | 0.92(0.82 to 1.04)* | 3  | 513        | 0.0  |                     | the probiotic Mutaflor                                                     |                    |                    |          |                                                        | adults or children with active UC or inactive UC                  |    |        |                 |  |  | the probiotic Mutaflor with mesalazine                       |
| the incidence of abdominal distension           | 0.27(0.17 to 0.43)  | 11 | 493/981    | 0.0  | CHEN X R 2021[2]    | early nutrition combined with probiotics                                   | enteral (EEN) with | ≥ 14 days          | All RCTs | All patients met the criteria of severe stroke         | early enteral nutrition (EEN) combined with probiotics versus EEN | OR | Random | No serious bias |  |  |                                                              |
| the incidence of diarrhea                       | 0.20(0.12 to 0.32)  | 14 | 604/1205   | 0.0  |                     |                                                                            |                    |                    |          |                                                        |                                                                   |    |        |                 |  |  |                                                              |
| the incidence of vomiting                       | 0.20(0.12 to 0.32)  | 8  | 301/602    | 0.0  |                     |                                                                            |                    |                    |          |                                                        |                                                                   |    |        |                 |  |  |                                                              |
| the incidence of gastric retention              | 0.25(0.11 to 0.55)  | 3  | 148/296    | 0.0  |                     |                                                                            |                    |                    |          |                                                        |                                                                   |    |        |                 |  |  |                                                              |
| the incidence of constipation                   | 0.20(0.12 to 0.32)  | 14 | 590/1177   | 0.0  |                     |                                                                            |                    |                    |          |                                                        |                                                                   |    |        |                 |  |  |                                                              |
| the incidence of reflux                         | 0.47(0.21 to 1.02)* | 7  | 316/632    | 19.0 |                     |                                                                            |                    |                    |          |                                                        |                                                                   |    |        |                 |  |  |                                                              |
| the incidence of digestive tract hemorrhage     | 0.31(0.18 to 0.52)  | 12 | 537/1072   | 0.0  |                     |                                                                            |                    |                    |          |                                                        |                                                                   |    |        |                 |  |  |                                                              |
| the incidence of stress ulcer                   | 0.64(0.21 to 1.92)* | 3  | 118/236    | 0.0  |                     |                                                                            |                    |                    |          |                                                        |                                                                   |    |        |                 |  |  |                                                              |
| the incidence of gastrointestinal complications | 0.29(0.24 to 0.36)  | 17 | 3169/6352  | 0.0  |                     |                                                                            |                    |                    |          |                                                        |                                                                   |    |        |                 |  |  |                                                              |
| incidence of antibiotic-associated diarrhoea    | 0.63 (0.54 to 0.73) | 42 | 5985/11305 | 60.0 | GOODMAN C 2021 [49] | probiotic                                                                  |                    | NP                 | All RCTs | adult population to whom antibiotics were administered | probiotics versus any control                                     | RR | Random | No serious bias |  |  |                                                              |
|                                                 | 0.54 (0.38 to 0.76) | 4  | 324/651    | 0.0  |                     |                                                                            |                    |                    |          |                                                        | High dose vs low dose                                             |    |        |                 |  |  |                                                              |
| incidence of antibiotic-associated diarrhoea    | 0.45 (0.36 to 0.56) | 33 | 6352       | 57.0 | GUO Q 2019 [50]     | specific, identified probiotic in any form (e.g. capsule, sachet, yogurt). |                    | 5 days to 12 weeks | All RCTs | children (0 to 18 years) receiving antibiotics         | Probiotic Versus Control (placebo or                              | RR | Random | No serious      |  |  |                                                              |

|                                                                               |                         |                     |           |      |                       |                                                        |                                                                                                                                                  |          |                                                                  |                                        |                                                                   |         |                  |      |
|-------------------------------------------------------------------------------|-------------------------|---------------------|-----------|------|-----------------------|--------------------------------------------------------|--------------------------------------------------------------------------------------------------------------------------------------------------|----------|------------------------------------------------------------------|----------------------------------------|-------------------------------------------------------------------|---------|------------------|------|
|                                                                               |                         | 0.37 (0.30 to 0.46) | 20        | 4038 | NP                    |                                                        | Trials investigating non-specific probiotic or yogurt agents (e.g. products that do not label the probiotic strain and dose) were not considered |          |                                                                  |                                        | non-active control)                                               |         |                  | bias |
|                                                                               |                         |                     |           |      |                       |                                                        |                                                                                                                                                  |          |                                                                  |                                        | Probiotic dose (≥5 billion CFUs of probiotics/day) Versus Control |         |                  |      |
| Duration of diarrhea (days)                                                   | -0.91 (-1.38 to -0.44 ) | 8                   | 1263      | 84.0 |                       | 10 days to 12 weeks                                    |                                                                                                                                                  |          |                                                                  |                                        | Probiotic Versus Control                                          | MD      |                  |      |
| incidence of antibiotic-associated diarrhoea                                  | 0.58 (0.48 to 0.71)     | 30                  | 3805/7023 | 58.0 | JAFARNEJAD S 2016[51] | oral probiotic intake (in either supplements or foods) | NP                                                                                                                                               | All RCTs | individuals aged >18                                             | Probiotic Versus Control               | RR                                                                | rando m | No serio us bias |      |
|                                                                               | 0.47 (0.40 to 0.56)     | 25                  | 20873826  | 43.0 |                       |                                                        |                                                                                                                                                  |          | adults (18–64 years)                                             |                                        |                                                                   |         |                  |      |
|                                                                               | 0.94 (0.76 to 1.15)*    | 5                   | 1718/3434 | 65.0 |                       |                                                        |                                                                                                                                                  |          | the elderly (>65 years)                                          |                                        |                                                                   |         |                  |      |
| the incidence of AAD                                                          | 0.49 (0.36 to 0.66)     | 17                  | 1832/3611 | 58.0 | BLAABJERGS 2017[52]   | Probiotics                                             | NA                                                                                                                                               | All RCTs | outpatients taking oral antibiotics                              | probiotics vs. Placebo or no treatment | RR                                                                | rando m | No serio us bias |      |
|                                                                               | 0.49 (0.36 to 0.66)     | 4                   | 590/1139  | 0.0  |                       | S. boulardii                                           |                                                                                                                                                  |          |                                                                  |                                        |                                                                   |         | NP               |      |
| Incidence of Antibiotic-Associated Diarrhea Using the Criteria Defined by WHO | 0.54 (0.36 to 0.82)     | 7                   | 876/1724  | 27.0 |                       | Probiotics                                             |                                                                                                                                                  |          |                                                                  |                                        |                                                                   |         | NP               |      |
| the incidence of AAD                                                          | 0.42 (-0.23 to 0.77)    | 7                   | 726/1446  | 76.0 |                       |                                                        |                                                                                                                                                  |          | outpatients taking oral antibiotics, children (<15 years of age) |                                        | RD (risk differe nce)                                             |         |                  |      |
|                                                                               | 0.42 (-0.23 to 0.77)    | 9                   | 975/1936  | 47.0 |                       |                                                        |                                                                                                                                                  |          | outpatients taking oral antibiotics, adults (>15 years of age)   |                                        |                                                                   |         |                  |      |
| inducing/maintaining remission IBD                                            | 1.13 (1.02 to 1.26)     | 21                  | 918/1816  | 55.1 | ZHANG 2021 [53]       | X probiotics, prebiotics or                            | NP                                                                                                                                               | All RCTs | Patient with Inflammatory                                        | probiotics, prebiotics                 | RR                                                                | rando m | 0.33 6           |      |



|                                                                                  |                        |    |         |      |                           |     |                                       |                                      |          |                                                                          |                                                |     |        |                 |
|----------------------------------------------------------------------------------|------------------------|----|---------|------|---------------------------|-----|---------------------------------------|--------------------------------------|----------|--------------------------------------------------------------------------|------------------------------------------------|-----|--------|-----------------|
| UC disease activity index                                                        | 1.00 (0.27 to 1.73)    | 10 | 1026    | 0.0  |                           |     | synbiotics                            |                                      |          |                                                                          | bowel disease and synbiotics vs. Control group | SMD |        | 0.463           |
| CD disease activity index                                                        | -0.33 (-1.05 to 0.38)* | 4  | 206     | 79.9 |                           |     |                                       |                                      |          |                                                                          |                                                | SMD |        | NP              |
| IBD recurrence                                                                   | 0.48 (0.65 to 1.08)*   | 13 | 1372    | 52.7 |                           |     |                                       |                                      |          |                                                                          |                                                | RR  |        | 0.034           |
| preventing relapse in active UC                                                  | 1.02 (0.85 to 1.23)*   | 3  | 277/555 | 0.0  | DERWA 2017 [54]           | Y   | probiotics                            | NP                                   | All RCTs | Adults (>90% of patients aged >16 years) with inflammatory bowel disease | probiotics vs. placebo                         | RR  | random | NA              |
| preventing relapse in CD in remission following a surgical resection             | 1.06 (0.59 to 1.92)*   | 4  | 105/213 | 37.0 |                           |     |                                       |                                      |          |                                                                          | Probiotics vs. 5-ASA                           |     |        |                 |
| prevention of endoscopic relapse of disease activity (Rutgeerts score 1 or more) | 1.09 (0.92 to 1.29)*   | 4  | 163/233 | 53.0 |                           |     |                                       |                                      |          |                                                                          | probiotics vs. placebo                         |     |        |                 |
| Endoscopic relapse of disease activity (Rutgeerts score 2 or more)               | 1.04 (0.82 to 1.31)*   | 4  | 163/233 | 32.0 |                           |     |                                       |                                      |          |                                                                          |                                                |     |        |                 |
| Endoscopic relapse of disease activity (Rutgeerts score 3 or more)               | 1.13 (0.84 to 1.52)*   | 4  | 163/233 | 0.0  |                           |     |                                       |                                      |          |                                                                          |                                                |     |        |                 |
| Efficacy of probiotics in inducing remission in active UC                        | 0.81 (0.72 to 0.91)    | 9  | 362/759 | 32.0 | PABON-CAR RASCO 2020 [55] | M   | probiotics                            | 0.5-12 months                        | All RCTs | Adult with inflammatory bowel disease                                    | probiotics vs. placebo                         | RR  | fixed  | No serious bias |
| Efficacy of probiotics in preventing relapse in quiescent UC                     | 0.89 (0.68 to 1.15)*   | 3  | 147/284 | 0.0  |                           |     |                                       |                                      |          |                                                                          |                                                |     |        |                 |
| Efficacy of the Probiotics for the Remission of Crohn's Disease                  | 0.90 (0.77 to 1.06)*   | 5  | 253/494 | 37.0 |                           |     |                                       |                                      |          |                                                                          |                                                |     |        |                 |
| effect on persistence of symptoms                                                | 0.79 (0.68 to 0.91)    | 21 | 1931    | 72.0 | FORD 2018[56]             | A C | Combination probiotics                | Minimum treatment duration of 7 days | All RCTs | Adults (participants aged >16 years)                                     | probiotics vs. Control group                   | RR  | random | 0.06            |
|                                                                                  | 0.82 (0.63 to 1.06)*   | 8  | 893     | 83.0 |                           |     | Lactobacillus                         |                                      |          |                                                                          |                                                |     |        | NP              |
|                                                                                  | 0.67 (0.51 to 0.87)    | 3  | 314     | 63.0 |                           |     | Only Lactobacillus plantarum DSM 9843 |                                      |          |                                                                          |                                                |     |        |                 |
|                                                                                  | 0.70 (0.48 to 1.01)*   | 3  | 528     | 72.0 |                           |     | Bifidobacterium                       | Minimum follow-up duration           |          |                                                                          |                                                |     |        |                 |
| effect on global symptom or abdominal pain scores                                | -0.31 (-0.44 to -0.17) | 19 | 1341    | 24.0 |                           |     | Combination probiotics                |                                      |          |                                                                          |                                                | SMD |        | 0.06            |

|                                  |                        |    |      |       |                    |                                             |       |            |          |                                                                                        |                                                 |        |        |    |
|----------------------------------|------------------------|----|------|-------|--------------------|---------------------------------------------|-------|------------|----------|----------------------------------------------------------------------------------------|-------------------------------------------------|--------|--------|----|
| bloating scores                  | -0.09 (-0.25 to 0.036) | 9  | 989  | 25.0  | ASHA M Z 2020[57]  | Lactobacillus                               | or    | 7          | All RCTs | adult patients (aged ≥18 years)                                                        | IBS (aged or probiotics vs. Control group)      | SMD    | random | NP |
|                                  | 0.12 (-0.27 to 0.50)*  | 4  | 388  | 70.0  |                    | Saccharomyces                               |       |            |          |                                                                                        |                                                 |        |        |    |
|                                  | -0.46 (-0.92 to 0.00)  | 3  | 501  | 77.0  |                    | Bifidobacterium                             |       |            |          |                                                                                        |                                                 |        |        |    |
|                                  | -0.15 (-0.31 to 0.01)* | 17 | 1155 | 36.0  |                    | Combination probiotics                      |       |            |          |                                                                                        |                                                 |        |        |    |
|                                  | -0.30 (-0.68 to 0.09)* | 3  | 501  | 68.0  |                    | Bifidobacterium                             |       |            |          |                                                                                        |                                                 |        |        |    |
|                                  | -0.01 (-0.36 to 0.34)* | 3  | 209  | 40.0  |                    | Saccharomyces                               |       |            |          |                                                                                        |                                                 |        |        |    |
| flatulence symptom scores        | -0.29 (-0.51 to -0.07) | 8  | 318  | 0.0   |                    | Combination probiotics                      |       |            |          |                                                                                        |                                                 |        |        |    |
| global symptom scores            | -0.23 (-0.44 to -0.02) | 17 | 2401 | 72.0  | ASHA M Z 2020[57]  | Probiotics prebiotics                       | or    | 2-24 weeks | All RCTs | adult patients (aged ≥18 years)                                                        | IBS (aged or probiotics vs. Control group)      | SMD    | random | NP |
| abdominal pain scores            | -0.18 (-0.43 to 0.07)* | 29 | 3688 | 92.0  |                    | Probiotics prebiotics synbiotics            | or or |            |          |                                                                                        |                                                 |        |        |    |
|                                  | -0.71 (-1.33 to -0.10) | 5  | 660  | NP    |                    | probiotics containing Lactobacillus species |       |            |          |                                                                                        |                                                 |        |        |    |
| Abdominal pain score             | -1.15 (-2.05 to -0.24) | 7  | 508  | 95.0  | XU H L 2021 [58]   | probiotics                                  |       | 4-8 weeks  | All RCTs | Patients aged between 4 and 18 years with IBS met the diagnostic criteria (Rome II-IV) | probiotics vs. Control group                    | SMD    | random | NP |
| Abdominal pain treatment success | 3.44 (1.73 to 6.87)    | 3  | 163  | 0.0   |                    |                                             |       |            |          |                                                                                        |                                                 | RR     |        |    |
| Abdominal pain relief            | 1.48 (0.96 to 2.28)*   | 3  | 167  | 40.0  |                    |                                             |       |            |          |                                                                                        |                                                 | RR     |        |    |
| Frequency of abdominal pain      | -0.82 (-1.57 to -0.07) | 3  | 147  | 2.0   |                    |                                             |       |            |          |                                                                                        |                                                 | MD     |        |    |
| Standard abdominal pain          | -0.15 (-0.27 to -0.04) | 6  | 508  | 94.0  |                    |                                             |       |            |          |                                                                                        |                                                 | MD     |        |    |
| Abdominal pain                   | 0.03 (-0.22 to 0.29)*  | 5  | 243  | 0.0   | CONNELL M 2018[59] | VSL#3                                       |       | 4-8 weeks  | All RCTs | IBS patient                                                                            | VSL#3 vs. placebo                               | SMD    | fixed  | NP |
| Stool consistency                | -0.00 (-0.09 to 0.08)* | 3  | 177  | 0.0   |                    |                                             |       |            |          |                                                                                        |                                                 | MD     |        |    |
| Overall response                 | 1.39 (0.98 to 1.96) *  | 3  | 177  | 0.0   |                    |                                             |       |            |          |                                                                                        |                                                 | RR     |        |    |
| Abdominal bloating               | 0.15 (-0.11 to 0.40)*  | 5  | 243  | 5.0   |                    |                                             |       |            |          |                                                                                        |                                                 | SMD    |        |    |
| Quality of Life                  | -0.08 (-0.39 to 0.22)* | 3  | 170  | 0.0   |                    |                                             |       |            |          |                                                                                        |                                                 | SMD    |        |    |
| Abdominal pain                   | 0.25 (-0.27 to 0.77)*  | 3  | 554  | ≥ 50% | YUAN F Q 2017[60]  | B. Infantis only                            |       | 4-8 weeks  | All RCTs | patients with IBS, age greater than 15 years old                                       | Probiotics Including B. Infantis versus placebo | SMD    | random | NP |
|                                  | 0.23 (-0.03 to 0.49)*  | 5  | 666  | ≥ 50% |                    | B. Infantis only or composite probiotic     |       |            |          |                                                                                        |                                                 | random |        |    |

|                                                     |                        |    |      |       |                    |                                                                        |                                                 |                                                           |                                                                                                                                                           |                                                                                      |     |        |                 |  |
|-----------------------------------------------------|------------------------|----|------|-------|--------------------|------------------------------------------------------------------------|-------------------------------------------------|-----------------------------------------------------------|-----------------------------------------------------------------------------------------------------------------------------------------------------------|--------------------------------------------------------------------------------------|-----|--------|-----------------|--|
|                                                     |                        |    |      |       |                    | Including B. Infantis                                                  |                                                 |                                                           |                                                                                                                                                           |                                                                                      |     |        |                 |  |
| Bloating/distention                                 | 0.20 (-0.19 to 0.58)*  | 3  | 554  | ≥ 50% |                    | B. Infantis only                                                       |                                                 |                                                           |                                                                                                                                                           |                                                                                      |     |        | Fixed           |  |
|                                                     | 0.21 (0.07 to 0.35)    | 5  | 666  | ≤ 50% |                    | B. Infantis only or composite probiotic                                |                                                 |                                                           |                                                                                                                                                           |                                                                                      |     |        | fixed           |  |
|                                                     |                        |    |      |       |                    | Including B. Infantis                                                  |                                                 |                                                           |                                                                                                                                                           |                                                                                      |     |        |                 |  |
| Bowel habit satisfaction                            | 0.66 (-0.11 to 1.43)*  | 3  | 554  | ≥ 50% |                    | B. Infantis only                                                       |                                                 |                                                           |                                                                                                                                                           |                                                                                      |     |        | random          |  |
| stool frequency                                     | 1.29 (0.69 to 1.89)*   | 10 | 1039 | 90.0  | WEN Y 2020 [61]    | Any species/strains/dose/treatment regimen of live probiotics          | 2-12 weeks                                      | All RCTs                                                  | Adult populations aged ≥16 y with functional chronic constipation defined by clinical symptoms, a physician's opinion, or the Rome I, II, or III criteria | probiotics vs. placebo                                                               | MD  | random | 0.183           |  |
| Effect of probiotics on stool consistency for IBS-C | 0.55 (0.27 to 0.82)    | 9  | NP   | 80.0  |                    |                                                                        |                                                 |                                                           |                                                                                                                                                           |                                                                                      | SMD |        | 0.583           |  |
|                                                     | 0.46 (0.08 to 0.85)    | 4  | NP   | NP    |                    | B. lactis                                                              |                                                 |                                                           |                                                                                                                                                           |                                                                                      |     |        | NP              |  |
| Satisfaction in relief                              | 0.95 (0.77 to 1.18)*   | 3  | 315  |       |                    | Any species/strains/dose/treatment regimen of live probiotics          |                                                 |                                                           |                                                                                                                                                           |                                                                                      | RR  | fixed  |                 |  |
| Bloating                                            | -0.77 (-1.46 to -0.07) | 4  | 460  |       |                    |                                                                        |                                                 |                                                           |                                                                                                                                                           |                                                                                      | SMD | random |                 |  |
| Flatulence                                          | -0.34 (-0.70 to 0.02)* | 3  | 158  |       |                    |                                                                        |                                                 |                                                           |                                                                                                                                                           |                                                                                      |     | fixed  |                 |  |
| Incomplete evacuation                               | -0.77 (-1.14 to -0.39) | 6  | 502  |       |                    |                                                                        |                                                 |                                                           |                                                                                                                                                           |                                                                                      |     | random |                 |  |
| Hard stools                                         | -0.74 (-1.19 to -0.28) | 5  | 280  |       |                    |                                                                        |                                                 |                                                           |                                                                                                                                                           |                                                                                      |     |        |                 |  |
| Ease of expulsion                                   | 0.81 (0.15 to 1.48)    | 4  | 392  |       |                    |                                                                        |                                                 |                                                           |                                                                                                                                                           |                                                                                      |     |        |                 |  |
| incidence of diarrhea                               | 0.51 (0.37 to 0.70)    | 4  | 404  | 0.0   | WU X D 2018 [62]   | prophylactic probiotics in combination with antibiotics preoperatively | Preoperation 1-14 days, postoperation 0-14 days | All RCTs                                                  | adult patients who undergo colorectal surgery                                                                                                             | Vs. placebo or other base ingredients in combination with antibiotics preoperatively | RR  | random | No serious bias |  |
| abdominal distention                                | 0.63 (0.48 to 0.83)    | 5  | 394  | 0.0   |                    |                                                                        |                                                 |                                                           |                                                                                                                                                           |                                                                                      |     |        |                 |  |
| stool frequency                                     | -0.09 (-0.47 to 0.29)* | 4  | NP   | 0.0   | ZHONG C Q 2017[63] | Probiotic                                                              | NP                                              | RCTs, crossover trials, prospective single-arm trials and | Human                                                                                                                                                     | Probiotics vs. No probiotics                                                         | WMD | random | NP              |  |

|                                                       |                          |    |      |      |                       |                                                                                                      |               |                                                                                                                   |                                                                                                                                                                          |                                   |    |            |                           |
|-------------------------------------------------------|--------------------------|----|------|------|-----------------------|------------------------------------------------------------------------------------------------------|---------------|-------------------------------------------------------------------------------------------------------------------|--------------------------------------------------------------------------------------------------------------------------------------------------------------------------|-----------------------------------|----|------------|---------------------------|
|                                                       |                          |    |      |      |                       |                                                                                                      |               |                                                                                                                   | retrospect<br>ive<br>studies                                                                                                                                             |                                   |    |            |                           |
| AIDS-related diarrhea                                 | 0.60 (0.44 to 0.82)      | 6  | 360  | 0.0  | ZHANG X L<br>2021[19] | probiotic                                                                                            | 2-48<br>weeks | RCTs,<br>clinical<br>cohort<br>studies,<br>pilot<br>study<br>with<br>controls,<br>or other<br>clinical<br>studies | HIV/AIDS<br>patients and<br>patients<br>diagnosed with<br>similar<br>recognized<br>criteria based on<br>laboratory<br>evidence or<br>methods of HIV<br>infection         | Probiotic<br>vs. No<br>probiotic  | MD | fixed      | No<br>serio<br>us<br>bias |
| Stool frequency                                       | 0.98 (0.39 to 1.56)      | 15 | 1189 | 87.0 | ZHANG<br>2020[64]     | C Probiotics<br>administered in<br>the form of any<br>formulation or<br>dairy product                | 2-16<br>weeks | All RCTs                                                                                                          | adults                                                                                                                                                                   | probiotics<br>vs placebo          | MD | rando<br>m | 0.32                      |
| Gut transit time                                      | -13.75 (-21.93 to -5.56) | 5  | 325  | 69.0 |                       |                                                                                                      |               |                                                                                                                   |                                                                                                                                                                          |                                   |    |            | 0.81                      |
| Stool consistency                                     | 1.30 (0.22 to 2.38)      | 6  | 386  | 96.0 |                       |                                                                                                      |               |                                                                                                                   |                                                                                                                                                                          |                                   |    |            | 0.21                      |
| Bloating                                              | -0.24 (-0.55 to 0.07)*   | 4  | 282  | 27.0 |                       |                                                                                                      |               |                                                                                                                   |                                                                                                                                                                          |                                   |    |            | 0.77                      |
| stool frequency                                       | 0.73 (0.14 to 1.31)      | 6  | 444  | 84.0 | HUANG<br>2017[65]     | R Any type of<br>culture/strain/dos<br>e/therapy regimen<br>of probiotics<br>(include<br>synbiotics) | 3-12<br>weeks | All RCTs                                                                                                          | children aged ≤<br>18 years with<br>constipation<br>identified by<br>relative clinical<br>symptoms,<br>pediatric<br>physicians, or<br>the Rome I, II, or<br>III criteria | probiotics<br>vs control<br>group | MD | rando<br>m | No<br>serio<br>us<br>bias |
| stool consistency                                     | -0.07 (-0.21 to 0.06)*   | 3  | 267  | 92.0 |                       |                                                                                                      |               |                                                                                                                   |                                                                                                                                                                          |                                   |    |            |                           |
| eradication of H. pylori                              | 7.91 (2.97 to 21.05)     | 6  | 352  | 0.0  | LOSURDO G<br>2018[66] | probiotic<br>supplementation                                                                         | NP            | All RCTs                                                                                                          | H.<br>pylori-infected<br>patients                                                                                                                                        | Vs. placebo                       | OR | fixed      | 0.02                      |
| oropharyngeal colonization                            | 0.87 (0.76 to 0.99)      | 6  | 915  | 0.0  | JI T 2020[67]         | probiotic                                                                                            | NP            | All RCTs                                                                                                          | adults who<br>received<br>mechanical<br>ventilation (MV)<br>therapy in<br>hospitals                                                                                      | Vs. control                       | RR | fixed      | NP                        |
| gastric colonization                                  | 0.65 (0.49 to 0.84)      | 4  | 519  | 30.2 |                       |                                                                                                      |               |                                                                                                                   |                                                                                                                                                                          |                                   |    | fixed      |                           |
| rate of gram-negative (GN)<br>bacteria positivity     | 0.58 (0.58 to 0.86)      | 9  | 1247 | 60.0 |                       |                                                                                                      |               |                                                                                                                   |                                                                                                                                                                          |                                   |    | rando<br>m |                           |
| positive rate of<br>gram-positive bacteria<br>culture | 0.95 (0.67 to 1.35)*     | 8  | 1175 | 31.3 |                       |                                                                                                      |               |                                                                                                                   |                                                                                                                                                                          |                                   |    | fixed      |                           |
| positive fungal culture rates                         | 0.98 (0.67 to 1.43)*     | 7  | 886  | 26.5 |                       |                                                                                                      |               |                                                                                                                   |                                                                                                                                                                          |                                   |    | fixed      |                           |
| the incidence of diarrhea                             | 0.69 (0.47 to 1.02)*     | 8  | 1219 | 59.4 |                       |                                                                                                      |               |                                                                                                                   |                                                                                                                                                                          |                                   |    | rando      |                           |

| m                                     |                        |    |           |      |                   |   |                                                                                                |                                                                                          |          |                                                                                                             |                                                                                   |     |        |                 |
|---------------------------------------|------------------------|----|-----------|------|-------------------|---|------------------------------------------------------------------------------------------------|------------------------------------------------------------------------------------------|----------|-------------------------------------------------------------------------------------------------------------|-----------------------------------------------------------------------------------|-----|--------|-----------------|
| fecal zonulin                         | -0.63 (-1.17 to -0.08) | 3  | NP        | 79.4 | AS'HABI 2020 [32] | A | probiotics (supplement or food)                                                                | 2-20 weeks                                                                               | All RCTs | athletes                                                                                                    | Vs. control                                                                       | SMD | random | 0.19            |
| Stool pH                              | -0.65 (-0.76 to -0.54) | 6  | 470       | 81.0 | RAO 2009[68]      | S | combination of prebiotics and probiotics vs controls                                           | NP                                                                                       | All RCTs | full-term neonates                                                                                          | formula had different composition vs. the control formula (apart from prebiotics) | WMD | fixed  | No serious bias |
| Diarrheal episodes                    | 0.71 (0.35 to 1.43)*   | 3  | 606       | 99.0 | LOHNER 2014[69]   | S | prebiotics (prebiotics added to food in the manufacturing process or as a separate supplement) | a supplementation time of at least 2 months and an observation time of at least 4 months | All RCTs | healthy infants or children, aged 0–18 years                                                                | Vs. control (placebo or no supplementation)                                       | RR  | random | NP              |
| overall symptom response to treatment | 0.62 (0.07 to 5.69)*   | 3  | 191       | 91.0 | WILSON 2019[70]   | B | prebiotics                                                                                     | 2-12 weeks                                                                               | All RCTs | Adult patients ≥18 and ≤64 y with Irritable bowel syndrome (IBS) or other Functional bowel disorders (FBDs) | vs. placebo                                                                       | OR  | random | No serious bias |
| integrative symptom score             | -0.39 (-1.43 to 0.64)* | 8  | NP        | 97.0 |                   |   |                                                                                                |                                                                                          |          |                                                                                                             |                                                                                   | SMD |        |                 |
| severity of abdominal pain            | -0.83 (-1.84 to 0.18)* | 10 |           | 97.0 |                   |   |                                                                                                |                                                                                          |          |                                                                                                             |                                                                                   |     |        |                 |
| bloating                              | -0.57 (-1.67 to 0.52)* | 9  |           | 97.0 |                   |   |                                                                                                |                                                                                          |          |                                                                                                             |                                                                                   |     |        |                 |
| flatulence                            | -0.53 (-2.04 to 0.98)* | 6  |           | 98.0 |                   |   |                                                                                                |                                                                                          |          |                                                                                                             |                                                                                   |     |        |                 |
| necrotizing enterocolitis             | 0.79 (0.14 to 1.44)*   | 6  | 737       | 21.0 | CHI 2019[71]      | C | prebiotics                                                                                     | 7-57 days                                                                                | All RCTs | low birth weight infants (<2500 g) or preterm infants (<36 weeks)                                           | vs. placebo                                                                       | RR  | random | 0.73            |
| feeding intolerance                   | 0.87 (0.52 to 1.45)*   | 4  | 413       | 0.0  |                   |   |                                                                                                |                                                                                          |          |                                                                                                             |                                                                                   |     |        | NA              |
| full enteral feeding                  | -0.99 (-1.15 to -0.83) | 7  | 576       | 0.0  |                   |   |                                                                                                |                                                                                          |          |                                                                                                             |                                                                                   |     |        | 0.63            |
| stool frequency                       | 0.52 (0.30 to 0.73)    | 6  | 294       | 13.0 |                   |   |                                                                                                |                                                                                          |          |                                                                                                             |                                                                                   |     |        | 0.32            |
| Clinical remission                    | 1.21 (1.18 to 1.24)    | 45 | 1816/3624 | NP   | Sohail 2018[72]   | G | probiotic Medilac-S                                                                            | 4-96 weeks                                                                               | All RCTs | human                                                                                                       | Vs. control                                                                       | RR  | fixed  | No serious      |
| Endoscopy scores                      | 0.71 (0.35 to 1.07)    | 7  | 270       |      |                   |   |                                                                                                |                                                                                          |          |                                                                                                             |                                                                                   | MD  | random | us              |

[illegible]

| Other outcomes                              |                               |    |           |      |                         |                  |                                          |                    |                                                           |                                   |                                                             |                                                                   |                 |        |                 |
|---------------------------------------------|-------------------------------|----|-----------|------|-------------------------|------------------|------------------------------------------|--------------------|-----------------------------------------------------------|-----------------------------------|-------------------------------------------------------------|-------------------------------------------------------------------|-----------------|--------|-----------------|
| Detection of C. difficile in stool          | 0.86 (0.67 to 1.10)*          | 15 | 1214      | 0.0  | GOLDENBERG J Z 2017[38] | probiotics       | NP                                       | All RCTs           | participants taking antibiotics                           | any versus none                   | RR                                                          | random                                                            | No serious bias |        |                 |
| Length of hospital stay                     | -0.17 (-1.03 to 0.68)*        | 4  | NP        | 0    |                         |                  |                                          |                    |                                                           |                                   | MD                                                          |                                                                   |                 |        |                 |
| the incidence of infection                  | 0.27(0.21 to 0.36)            | 16 | 1243/2483 | 0.0  |                         | CHEN X R 2021[2] | early nutrition combined with probiotics | enteral (EEN) with | ≥ 14 days                                                 | All RCTs                          | All patients met the criteria of severe stroke              | early enteral nutrition (EEN) combined with probiotics versus EEN | OR              | Random | No serious bias |
| the incidence of pulmonary infection        | 0.28(0.20 to 0.39)            | 16 | 698/1391  | 0.0  |                         |                  |                                          |                    |                                                           |                                   |                                                             |                                                                   |                 |        |                 |
| the incidence of urinary tract infection    | 0.23(0.13 to 0.43)            | 9  | 384/768   | 0.0  |                         |                  |                                          |                    |                                                           |                                   |                                                             |                                                                   |                 |        |                 |
| the incidence of gastrointestinal infection | 0.30(0.14to 0.66)             | 4  | 161/324   | 0.0  |                         |                  |                                          |                    |                                                           |                                   |                                                             |                                                                   |                 |        |                 |
| the enteral nutrition target time           | -2.18(-2.56 to -1.80)         | 4  | 163/324   | 84.0 |                         |                  |                                          |                    |                                                           |                                   |                                                             |                                                                   | MD              |        |                 |
| the length of hospital stay                 | -8.70(-13.24 to -4.16)        | 3  | 131/260   | 98.0 |                         |                  |                                          |                    |                                                           |                                   |                                                             |                                                                   |                 |        |                 |
| Effects on Body Weight                      | -0.55 (-0.91 to -0.19) kg     | 10 | 315/641   | 64.0 | WANG Z 2019[4]          | Probiotics       | NP                                       | All RCTs           | adults (≥18 years old) individuals with a BMI > 25 kg m-2 | the probiotics vs. control groups | MD                                                          | random                                                            | 0.446           |        |                 |
| Effects on Body Mass Index (BMI)            | -0.30 (-0.43 to -0.18) kg/m^2 | 11 | 357/717   | 59.0 |                         |                  |                                          |                    |                                                           |                                   |                                                             |                                                                   |                 | 0.006  |                 |
|                                             | -0.29 (-0.46 to -0.12) kg m-2 | 6  | 213       | 66.6 |                         |                  |                                          |                    |                                                           |                                   | Probiotics dosage ≥ 10 <sup>10</sup> CFU vs. control groups |                                                                   |                 | NP     |                 |
|                                             | -0.18 (-0.48 to 0.12) kg m-2* | 4  | 119       | 46.9 |                         |                  |                                          |                    |                                                           |                                   | Probiotics dosage < 10 <sup>10</sup> CFU vs. control groups |                                                                   |                 |        |                 |
|                                             | -0.36 (-0.52 to 0.20) kg m-2* | 4  | 138       | 56.8 |                         |                  |                                          |                    |                                                           |                                   | Single probiotics species vs. control groups                |                                                                   |                 |        |                 |
|                                             | -0.15 (-0.39 to 0.10) kg m-2* | 6  | 194       | 55.5 |                         |                  |                                          |                    |                                                           |                                   | Multiple probiotics species vs. control                     |                                                                   |                 |        |                 |

|                             |       |                           |    |         |      |                                                                         |           |
|-----------------------------|-------|---------------------------|----|---------|------|-------------------------------------------------------------------------|-----------|
| Effects on<br>Circumference | Waist | -1.20 (-2.21 to -0.19) cm | 8  | 281/573 | 90.0 | groups<br>the<br>probiotics<br>vs. control<br>groups                    | 0.40<br>3 |
|                             |       | -1.53 (-2.64 to -0.41) cm | 6  | 212     | 86.9 | Probiotics<br>dosage $\geq$<br>$10^{10}$ CFU<br>vs. control<br>groups   | NP        |
|                             |       | -0.32 (-0.84 to 0.20) cm* | 2  | 69      | 0.0  | Probiotics<br>dosage $<$<br>$10^{10}$ CFU<br>vs. control<br>groups      |           |
|                             |       | -1.69 (-3.04 to 0.33) cm  | 4  | 168     | 91.6 | Single<br>probiotics<br>species vs.<br>control<br>groups                |           |
|                             |       | -0.42 (-0.91 to 0.07) cm* | 4  | 113     | 0.0  | Multiple<br>probiotics<br>species vs.<br>control<br>groups              |           |
|                             |       | -1.34 (-2.76 to 0.08) cm* | 6  | 187     | 92.3 | Form of<br>probiotics:<br>Capsule or<br>powder vs.<br>control<br>groups |           |
|                             |       | -1.11 (-1.64 to -0.59) cm | 2  | 94      | 0.0  | Form of<br>probiotics:<br>Food vs.<br>control<br>groups                 |           |
|                             |       |                           |    |         |      |                                                                         |           |
| Effects on Fat Mass         |       | -0.91 (-1.19 to -0.63) kg | 11 | 311/632 | 43.0 | the<br>probiotics<br>vs. control<br>groups                              | 0.33<br>5 |
| Effects on Fat Percentage   |       | -0.92 (-1.27 to -0.56) %  | 6  | 224/450 | 57.0 | the<br>probiotics<br>vs. control                                        | 0.06<br>8 |



|                                                    |                               |    |          |      |                              |                                                                                                                                  |               |                                                                    |                                                                                                                                                               | groups                         |     |            |      |  |
|----------------------------------------------------|-------------------------------|----|----------|------|------------------------------|----------------------------------------------------------------------------------------------------------------------------------|---------------|--------------------------------------------------------------------|---------------------------------------------------------------------------------------------------------------------------------------------------------------|--------------------------------|-----|------------|------|--|
| the effect on body weight                          | -0.54 (-1.09 to 0.01) kg*     | 18 | 660/1239 | 0.0  | SUZUMURA<br>E A 2019 [78]    | Oral<br>supplementation<br>with probiotics or<br>synbiotics as an<br>isolated<br>intervention or as<br>part of a dietary<br>plan | 3-24wee<br>ks | Randomi<br>zed or<br>quasi-ran<br>domized<br>controlle<br>d trials | Overweight or<br>obese adults<br>(BMI ≥ 25 kg/m²<br>and age ≥ 18 y)<br>with no health<br>conditions that<br>potentially affect<br>metabolism or<br>body weigh | probiotics                     | MD  | rando      | No   |  |
| the effect on BMI                                  | -0.19 (-0.43 to 0.04) kg/m^2* | 15 | 447/895  | 51.0 |                              |                                                                                                                                  |               |                                                                    |                                                                                                                                                               | or                             | m   | serio      |      |  |
| the effect on waist<br>circumference               | -0.82 (-1.43 to -0.21) cm     | 12 | 455/864  | 46.0 |                              |                                                                                                                                  |               |                                                                    |                                                                                                                                                               | synbiotics                     |     | us         |      |  |
| the effect on body weight                          | -1.24 (-2.57 to 0.01) kg*     | 4  | 147/301  | 0.0  |                              |                                                                                                                                  |               |                                                                    |                                                                                                                                                               | oersus                         |     | bias       |      |  |
| the effect on BMI                                  | -0.33 (-1.22 to 0.57) kg/m^2* | 2  | 50/100   | 0.0  |                              |                                                                                                                                  |               |                                                                    |                                                                                                                                                               | Control                        |     |            |      |  |
| the effect on waist<br>circumference               | -3.39 (-5.07 to -1.72) cm     | 2  | 72/148   | 34.0 |                              |                                                                                                                                  |               |                                                                    |                                                                                                                                                               | synbiotics<br>vs control       |     |            | NP   |  |
| effect of the PFMP on body<br>weight               | -0.91 (-1.59 to -0.22) kg     | 16 | NP       | 67.3 | MOHAMMA<br>DI H 2021<br>[79] | Probiotics<br>fermented milk<br>products (PFMP)                                                                                  | 2-12wee<br>ks | All RCTs                                                           | adult<br>individuals >18<br>years old                                                                                                                         | PFMP<br>versus<br>placebo      | WMD | rando<br>m | 0.55 |  |
| effect of the PFMP on BMI                          | -0.33 (-0.48 to 0.18) kg/m^2* | 15 |          | 0.0  |                              |                                                                                                                                  |               |                                                                    |                                                                                                                                                               |                                |     |            | 5    |  |
| effect of the PFMP on waist<br>circumference       | -0.59 (-1.55 to 0.36) cm*     | 6  |          | 0.0  |                              |                                                                                                                                  |               |                                                                    |                                                                                                                                                               |                                |     |            | 0.40 |  |
| effect of the PFMP on body<br>fat percentage       | -3.75 (-9.39 to 1.90)*        | 5  |          | 90.3 |                              |                                                                                                                                  |               |                                                                    |                                                                                                                                                               |                                |     |            | 0.34 |  |
| The effects of synbiotic<br>supplementation on BMI | -0.12 (-0.40 to 0.16) kg/m^2* | 22 | NP       | 0.0  | HADI A 2020<br>[80]          | synbiotic<br>supplements                                                                                                         | ≥4<br>weeks   | All<br>randomiz<br>ed<br>clinical<br>trials                        | participants<br>over18 years                                                                                                                                  | synbiotic<br>versus<br>placebo | WMD | rando<br>m | 0.21 |  |
| The effects of synbiotic<br>supplementation on WC  | -2.07 (-3.11 to -1.03) cm     | 12 |          | 0.0  |                              |                                                                                                                                  |               |                                                                    |                                                                                                                                                               |                                |     |            | 0.68 |  |
|                                                    | -1.72 (-3.49 to 0.05) cm*     | 7  |          | 0.0  |                              |                                                                                                                                  |               |                                                                    |                                                                                                                                                               |                                |     |            | NP   |  |
|                                                    | -2.25 (-3.53 to -0.97) cm     | 5  |          | 0.0  |                              |                                                                                                                                  |               |                                                                    |                                                                                                                                                               |                                |     |            |      |  |
|                                                    |                               |    |          |      |                              |                                                                                                                                  |               |                                                                    |                                                                                                                                                               |                                |     |            |      |  |
|                                                    | -1.30 (-3.44 to 0.83) cm*     | 6  |          | 0.0  |                              |                                                                                                                                  |               |                                                                    |                                                                                                                                                               |                                |     |            |      |  |
|                                                    | -2.31 (-3.49 to -1.12) cm     | 6  |          | 0.0  |                              |                                                                                                                                  |               |                                                                    |                                                                                                                                                               |                                |     |            |      |  |

|                                                    |                            |    |     |                                                       |      |
|----------------------------------------------------|----------------------------|----|-----|-------------------------------------------------------|------|
|                                                    |                            |    |     | versus placebo                                        |      |
|                                                    | -1.97 (-3.06 to -0.86) cm  | 9  | 0.0 | Number of used strain: Multi versus placebo           |      |
|                                                    | -2.70 (-5.54 to 0.15) cm*  | 3  | 0.0 | Number of used strain: Single versus placebo          |      |
|                                                    | -2.269(-4.76 to 0.37) cm*  | 3  | 0.0 | Probiotic Dose > 2×10 <sup>8</sup> CFU versus placebo |      |
|                                                    | -1.69 (-3.23 to -0.16) cm  | 8  | 0.0 | Probiotic Dose ≤ 2×10 <sup>8</sup> CFU versus placebo |      |
| The effects of synbiotic supplementation on weight | -0.80 (-1.56 to -0.03) kg  | 20 | 0.0 | synbiotic versus placebo                              | 0.37 |
|                                                    | -0.54 (-2.93 to 1.85 ) kg* | 9  | 0.0 | Duration ≥ 12 Weeks versus placebo                    | NP   |
|                                                    | -0.83 (-1.63 to -0.02 ) kg | 11 | 0.0 | Duration < 12 Weeks versus placebo                    |      |
|                                                    | -1.48 (-2.68 to -0.28 ) kg | 14 | 0.0 | Number of used strain: Multi versus placebo           |      |
|                                                    | -0.33 (-1.32 to 0.67 ) kg* | 6  | 0.0 | Number of used                                        |      |

|                                                                                   |                                          |    |           |      |                         |                         |                           |          |                                                                                                                                                                        |                                                                                                                                                               |                          |        |                 |      |
|-----------------------------------------------------------------------------------|------------------------------------------|----|-----------|------|-------------------------|-------------------------|---------------------------|----------|------------------------------------------------------------------------------------------------------------------------------------------------------------------------|---------------------------------------------------------------------------------------------------------------------------------------------------------------|--------------------------|--------|-----------------|------|
|                                                                                   |                                          |    |           |      |                         |                         |                           |          |                                                                                                                                                                        |                                                                                                                                                               | strain:                  |        |                 |      |
|                                                                                   |                                          |    |           |      |                         |                         |                           |          |                                                                                                                                                                        |                                                                                                                                                               | Single versus placebo    |        |                 |      |
| The effects of synbiotic supplementation on body fat                              | 0.02 (-1.27 to 1.87) %*                  | 6  |           | 67.3 |                         |                         |                           |          |                                                                                                                                                                        |                                                                                                                                                               | synbiotic versus placebo |        |                 | 0.38 |
| Effects on waist-to-hip ratio                                                     | -0.01 (-0.01 to -0.01)                   | 5  | 192/395   | 24.0 | PONTES K S D S 2021 [5] | probiotics              | NP                        | All RCTs | adults (18 years or older) with overweight or obesity defined according to local standards for body mass index (BMI)                                                   | Probiotics versus placebo                                                                                                                                     | MD                       | random | No serious bias |      |
| Effects on total abdominal fat area                                               | -9.69 (-14.47 to -4.91 ) cm <sup>2</sup> | 4  | 350       | 0.0  |                         |                         |                           |          |                                                                                                                                                                        |                                                                                                                                                               |                          |        |                 |      |
| Effects on subcutaneous abdominal fat area                                        | -6.24 (-8.94 to -3.54 ) cm <sup>2</sup>  | 5  | 445       | 0.0  |                         |                         |                           |          |                                                                                                                                                                        |                                                                                                                                                               |                          |        |                 |      |
| Effects on visceral abdominal fat area                                            | -3.46 (-6.55 to 0.38 ) cm <sup>2</sup>   | 4  | 350       | 41.0 |                         |                         |                           |          |                                                                                                                                                                        |                                                                                                                                                               |                          |        |                 |      |
| Effects on Homeostasis Model of Assessment for Insulin Resistance Index (HOMA-IR) | -0.08 (-0.34 to 0.18 ) *                 | 9  | 322/765   | 47.0 |                         |                         |                           |          |                                                                                                                                                                        |                                                                                                                                                               |                          |        |                 |      |
| Effects of probiotics on systolic blood pressure                                  | -0.23 (-0.57 to 0.12 )mmHg*              | 7  | 318/641   | 0.0  |                         |                         |                           |          |                                                                                                                                                                        |                                                                                                                                                               |                          |        |                 |      |
| Effects of probiotics on diastolic blood pressure                                 | -0.35 (-0.76 to 0.06 )mmHg*              | 7  | 318/641   | 0.0  |                         |                         |                           |          |                                                                                                                                                                        |                                                                                                                                                               |                          |        |                 |      |
| the risk of atopic sensitization                                                  | 0.89 (0.77 to 1.03)*                     | 17 | 2974      | 9.0  | ZHANG 2016 [81]         | G probiotics/synbiotics | Follow-up: 1y - 2y of age | All RCTs | children in whom outcome assessment performed during infancy or childhood (ie, up to 12 years of age), without atopic diseases at the time of probiotic administration | any species/strains/doses regimen of live probiotics administered prenatally and/or postnatally within the first year of life versus placebo or no probiotics | RR                       | random | 0.988           |      |
|                                                                                   | 0.78 (0.66 to 0.92)                      | 12 | 1159/2085 | 0.0  |                         |                         |                           |          |                                                                                                                                                                        | probiotics were administered both                                                                                                                             |                          |        |                 | NP   |

[illegible]

|                                                          |                                          |    |         |      |                      |                                                                                  |                                                                 |                                                 |                                                                                                                             | formulation, placebo or no treatment control                                                               |     |        |       |                 |
|----------------------------------------------------------|------------------------------------------|----|---------|------|----------------------|----------------------------------------------------------------------------------|-----------------------------------------------------------------|-------------------------------------------------|-----------------------------------------------------------------------------------------------------------------------------|------------------------------------------------------------------------------------------------------------|-----|--------|-------|-----------------|
| body mass index                                          | -0.25 (-0.48 to -0.03) kg/m <sup>2</sup> | 7  | 208/416 | 97.0 | COZZOLINO M 2020 [7] | therapy with probiotics or synbiotics.                                           | administration of probiotics or synbiotics at least for 8 weeks | All RCTs                                        | women with Polycystic ovary syndrome (PCOS) according to Rotterdam criteria undergoing therapy with probiotics or symbiotic | administration of probiotics or Synbiotics versus without therapy with probiotics or synbiotics or placebo | MD  | random | NP    |                 |
| body weight                                              | -0.75 (-1.45 to -0.05) kg                | 7  | 208/416 | 98.0 |                      |                                                                                  |                                                                 |                                                 |                                                                                                                             |                                                                                                            |     |        |       |                 |
| the modified Ferriman–Gallway score                      | -1.00 (-1.75 to -0.26)                   | 3  | 90/180  | 83.0 |                      |                                                                                  |                                                                 |                                                 |                                                                                                                             |                                                                                                            |     |        |       |                 |
| Body Weight                                              | -0.11 (-0.34 to 0.13)*                   | 12 | 731     | 61.5 | LI Y L 2021 [8]      | probiotics, prebiotics, synbiotics separately or in combination with other drugs | 8 weeks to 3 months                                             | All RCTs                                        | women with a definite diagnosis of Polycystic ovary syndrome (PCOS)                                                         | probiotics, prebiotics, synbiotics intake separately or in combination with other drugs versus placebo     | SMD | random | 0.321 | No serious bias |
| BMI                                                      | -0.10 (-0.30 to 0.09)*                   | 13 | 791     | 47.3 |                      |                                                                                  |                                                                 |                                                 |                                                                                                                             |                                                                                                            |     |        | 0.150 |                 |
| Waist circumference (WC)                                 | 0.37 (-0.78 to 1.53)*                    | 5  | 316     | 95.5 |                      |                                                                                  |                                                                 |                                                 |                                                                                                                             |                                                                                                            |     |        |       |                 |
| hip circumference (HC)                                   | -0.25 (-0.78 to 0.27)*                   | 4  | NP      | 76.9 |                      |                                                                                  |                                                                 |                                                 |                                                                                                                             |                                                                                                            |     |        |       |                 |
| polymorphonuclear phagocytic capacity                    | 0.74 (0.38 to 1.11)                      | 3  | NP      | NP   | MILLER L E 2017 [83] | Bifidobacterium (B.) animalis ssp. lactis HN019                                  | 3-6 weeks                                                       | randomized or non-randomized controlled studies | healthy, elderly (≥60 years) adults                                                                                         | consumption of B. lactis HN019 vs. control                                                                 | SMD | random | NP    |                 |
| natural killer (NK) cell tumoricidal activity            | 0.43 (0.08 to 0.78)                      | 3  | NP      | NP   |                      |                                                                                  |                                                                 |                                                 |                                                                                                                             |                                                                                                            |     |        |       |                 |
| Polymorphonuclear cell phagocytic capacity               | 1.37 (0.86 to 1.88)                      | 9  | NP      | 80.0 | Miller LE 2019[84]   | probiotic consumption                                                            | 3-12 weeks                                                      | prospective controlled studies                  | healthy adults (mean age ≥ 60 years)                                                                                        | consumption of probiotic vs control                                                                        | SMD | random | 0.38  |                 |
| natural killer (NK) cell tumoricidal activity            | 0.55 (0.37 to 0.73)                      | 15 |         | 43.0 |                      |                                                                                  |                                                                 |                                                 |                                                                                                                             |                                                                                                            |     |        | 0.51  |                 |
| No-recovery (incomplete resolution of clinical symptoms) | 0.67(0.56 to 0.79)                       | 10 | 574     | 48.0 | DALAL 2017 [10]      | R probiotics                                                                     | follow-up: 1 month to 3 months                                  | randomised clinical trials                      | people with any grade of acute or chronic hepatic encephalopathy                                                            | probiotics in any dosage vs. placebo or no intervention                                                    | RR  | random | NP    |                 |

|                                            |                               |    |           |      |                                |                                                                            |    |                                                   |                                                                                                                                                        |                                                        |                                                                       |        |                 |  |  |
|--------------------------------------------|-------------------------------|----|-----------|------|--------------------------------|----------------------------------------------------------------------------|----|---------------------------------------------------|--------------------------------------------------------------------------------------------------------------------------------------------------------|--------------------------------------------------------|-----------------------------------------------------------------------|--------|-----------------|--|--|
|                                            |                               |    |           |      |                                |                                                                            |    |                                                   |                                                                                                                                                        |                                                        | n, or with any other treatment in people with hepatic encephalopathy. |        |                 |  |  |
| Effects of Probiotics on Late-Onset Sepsis | 0.88 (0.80 to 0.97)           | 28 | 4304/8535 | 23.0 | DERMYSHI E 2017 [85]           | enteral administration of probiotics                                       | NP | All RCTs                                          | very low birth weight (VLBW) (<1,500 g) preterm (<34 weeks gestational age) infants with enteral administration of probiotics initiated within 10 days | enteral administration of probiotics vs. Control group | RR                                                                    | fixed  | 0.242           |  |  |
| incidence of Late onset sepsis (LOS)       | 0.79 (0.71 to 0.88)           | 25 | 2934/5868 | 0.0  | ACETI A 2017 [86]              | any probiotic                                                              | NP | Randomized and quasi-randomized controlled trials | preterm infants (gestational age (GA) <37 weeks) received within one month of age any probiotic                                                        | any probiotic vs. placebo or no treatment              | RR                                                                    | fixed  | No serious bias |  |  |
|                                            | 0.75 (0.65 to 0.86)           | 20 | 1705/3402 | 0.0  |                                |                                                                            |    |                                                   | preterm infants (gestational age (GA) <37 weeks) (exclusively human-milk-fed)                                                                          |                                                        |                                                                       |        |                 |  |  |
|                                            | 0.77 (0.51 to 1.17)*          | 16 | 398/800   | 1.0  |                                |                                                                            |    |                                                   | preterm infants (gestational age (GA) <37 weeks) (mixed feeding)                                                                                       |                                                        |                                                                       |        |                 |  |  |
| Effect on body mass index                  | -0.39 ( -0.49 to -0.29) kg/m² | 20 | NP        | 97.9 | HERNANDEZ-SAAVEDRA D 2018 [13] | Any prebiotic or probiotic treatment, or a combination of both (synbiotic) | NP | All RCTs                                          | Male and female patients of any age that presented at least 1 of the following: NAFLD, steatosis, liver fibrosis,                                      | Vs. placebo                                            | MD                                                                    | random | No serious bias |  |  |

|                                                 |                             |    |      |      |                   |                                                                        |                                       |                    |                                                              |                                                      |                 |        |                 |       |  |       |  |
|-------------------------------------------------|-----------------------------|----|------|------|-------------------|------------------------------------------------------------------------|---------------------------------------|--------------------|--------------------------------------------------------------|------------------------------------------------------|-----------------|--------|-----------------|-------|--|-------|--|
|                                                 |                             |    |      |      |                   |                                                                        |                                       |                    |                                                              |                                                      | steatohepatitis |        |                 |       |  |       |  |
| Liver stiffness as measured by the fibro scan   | -0.62 (-0.89 to -0.35)      | 4  | 217  | 83.0 | KHAN M Y 2019[14] | probiotics and/or synbiotics                                           | NP                                    | All RCTs           | adult patients older than 18 years of age with NAFLD or NASH | Vs. placebo                                          | MD              | random | NP              |       |  |       |  |
| Infections Rate                                 | 0.21 (0.11 to 0.41)         | 4  | 246  | 1.0  | SAWAS 2015 [87]   | probiotics                                                             | NP                                    | controlled studies | Liver transplantation                                        | Vs. placebo                                          | RR              | fixed  | NP              |       |  |       |  |
| urinary tract infection (UTI)                   | 0.14 (0.04 to 0.47)         | 4  | 246  | 0.0  |                   |                                                                        |                                       |                    |                                                              |                                                      |                 |        |                 |       |  |       |  |
| intra-abdominal infection                       | 0.27 (0.09 to 0.78)         | 4  | 246  | 0.0  |                   |                                                                        |                                       |                    |                                                              |                                                      |                 |        |                 |       |  |       |  |
| length of hospital stay                         | -1.41 (-1.97 to -0.86) days | 3  | 196  | 0.0  |                   |                                                                        |                                       |                    |                                                              |                                                      |                 |        |                 | MD    |  |       |  |
| duration of antibiotic use                      | -3.89 (-4.17 to -3.60) days | 3  | 196  | 80.0 |                   |                                                                        |                                       |                    |                                                              |                                                      |                 |        |                 | RR    |  |       |  |
| Acute graft rejection                           | 0.73 (0.44 to 1.22)*        | 3  | 179  | 0.0  | YANG Z 2017 [88]  | Probiotic or synbiotic                                                 | NP                                    | All RCTs           | perioperative patient                                        | Vs. placebo or no probiotic intervention.            | OR              | random | 0.006           |       |  |       |  |
| postoperative infection rate                    | 0.35 (0.24 to 0.50)         | 23 | 1696 | 47.0 |                   |                                                                        |                                       |                    |                                                              |                                                      |                 |        |                 |       |  |       |  |
| pneumonia                                       | 0.44 (0.28 to 0.68)         | 16 | 1276 | 0.0  |                   |                                                                        |                                       |                    |                                                              |                                                      |                 |        |                 | 0.238 |  |       |  |
| urinary tract infection                         | 0.30 (0.16 to 0.55)         | 13 | 1151 | 0.0  |                   |                                                                        |                                       |                    |                                                              |                                                      |                 |        |                 | 0.666 |  |       |  |
| wound infection                                 | 0.58 (0.42 to 0.80)         | 18 | 1723 | 0.0  |                   |                                                                        |                                       |                    |                                                              |                                                      |                 |        |                 | 0.097 |  |       |  |
| intra-abdominal abscess                         | 0.65 (0.28 to 1.55)         | 10 | 495  | 0.0  |                   |                                                                        |                                       |                    |                                                              |                                                      |                 |        |                 | 0.744 |  |       |  |
| Postoperative mortality                         | 1.19 (0.52 to 2.74)         | 8  | 1648 | 21.0 |                   |                                                                        |                                       |                    |                                                              |                                                      |                 |        |                 | 0.179 |  |       |  |
| lengths of hospital stay                        | -3.20 (-4.87 to -1.54) days | 12 | 807  | 89.0 |                   |                                                                        |                                       |                    |                                                              |                                                      |                 |        |                 | MD    |  | 0.094 |  |
| antibiotic therapy                              | -3.40 (-4.67 to -2.13)      | 11 | 922  | 92.0 |                   |                                                                        |                                       |                    |                                                              |                                                      |                 |        |                 |       |  | 0.954 |  |
| ICU stay                                        | -0.46 (-1.07 to 0.14)*      | 7  | 453  | 70.0 |                   |                                                                        |                                       |                    |                                                              |                                                      |                 |        |                 |       |  | 0.151 |  |
| the incidence of surgical site infections (SSI) | 0.72 (0.56 to 0.92)         | 13 | 1374 | 0.0  | WU X D 2018 [62]  | prophylactic probiotics in combination with antibiotics preoperatively | Preoperation 1-14 days, postoperation | All RCTs           | adult patients who undergo colorectal surgery                | Vs. placebo or other base ingredients in combination | RR              | random | No serious bias |       |  |       |  |
| pneumonia                                       | 0.50 (0.29 to 0.84)         | 10 | 807  | 0.0  |                   |                                                                        |                                       |                    |                                                              |                                                      |                 |        |                 |       |  |       |  |

|                                           |  |                          |                             |    |      |                                |                                     |                                                         |          |                   |                              |                                   |        |    |  |
|-------------------------------------------|--|--------------------------|-----------------------------|----|------|--------------------------------|-------------------------------------|---------------------------------------------------------|----------|-------------------|------------------------------|-----------------------------------|--------|----|--|
| urinary tract infection                   |  |                          | 0.50 (0.25 to 0.98)         | 8  | 705  | 0.0                            |                                     |                                                         |          |                   | 0-14 days                    | n with antibiotics preoperatively |        |    |  |
| cumulative duration of antibiotic therapy |  |                          | -1.24 (-1.61 to -0.86) days | 5  | 504  | 0.0                            |                                     |                                                         |          |                   |                              |                                   |        |    |  |
| length of stay                            |  |                          | -1.16 (-1.91 to -0.41) days | 7  | 514  | 0.0                            |                                     |                                                         |          |                   | MD                           |                                   |        |    |  |
| prevention of bacterial translocation     |  | 0.75 (0.46 to 1.21)*     | 7                           | NP | NP   | SKONIECZNA-ZYDECKA K 2018 [15] | treatment with pro-/pre-/synbiotics | Preoperation 0-15 days, postoperation 0-until discharge | All RCTs | surgical patients | Probiotics vs. No probiotics | SMD                               | random | NP |  |
| pneumonia                                 |  | 0.55 (0.38 to 0.80)      | 21                          |    | 0.0  |                                |                                     |                                                         |          |                   |                              |                                   |        |    |  |
| surgical site infection                   |  | 0.55 (0.39 to 0.78)      | 10                          |    | 7.89 |                                |                                     |                                                         |          |                   |                              |                                   |        |    |  |
| Abdominal distention                      |  | 0.64 (0.47 to 0.86)      | 4                           |    | 0.0  |                                |                                     |                                                         |          |                   |                              |                                   |        |    |  |
| Anastomotic leakage                       |  | 0.73 (0.43 to 1.24)*     | 9                           |    | 3.69 |                                |                                     |                                                         |          |                   |                              |                                   |        |    |  |
| Deep organ space                          |  | 0.62 (0.31 to 1.25)*     | 5                           |    | 0.0  |                                |                                     |                                                         |          |                   |                              |                                   |        |    |  |
| Diarrhea                                  |  | 0.49 (0.37, 0.67)        | 7                           |    | 0.0  |                                |                                     |                                                         |          |                   |                              |                                   |        |    |  |
| Intraabdominal abscess                    |  | 0.69 (0.35 to 1.37)*     | 8                           |    | 0.0  |                                |                                     |                                                         |          |                   |                              |                                   |        |    |  |
| MRSA infection                            |  | 0.34 (0.11 to 1.06)*     | 4                           |    | 0.0  |                                |                                     |                                                         |          |                   |                              |                                   |        |    |  |
| Peritonitis                               |  | 0.34 (0.09 to 1.32)*     | 4                           |    | 0.0  |                                |                                     |                                                         |          |                   |                              |                                   |        |    |  |
| Reoperation                               |  | 0.43 (0.14 to 1.29)*     | 3                           |    | 0.0  |                                |                                     |                                                         |          |                   |                              |                                   |        |    |  |
| Sepsis                                    |  | 0.69 (0.58, 0.81)        | 7                           |    | 0.0  |                                |                                     |                                                         |          |                   |                              |                                   |        |    |  |
| Superficial incisional                    |  | 0.53 (0.38 to 0.74)      | 15                          |    | 0.0  |                                |                                     |                                                         |          |                   |                              |                                   |        |    |  |
| UTI                                       |  | 0.32 (0.18 to 0.57)      | 13                          |    | 0.0  |                                |                                     |                                                         |          |                   |                              |                                   |        |    |  |
| Blood loss                                |  | 0.004 (-0.120 to 0.128)* | 7                           |    | 0.0  |                                |                                     |                                                         |          |                   |                              |                                   |        |    |  |
| Duration of antibiotic therapy            |  | -0.60 (-1.09 to -0.10)   | 10                          |    | 91.0 |                                |                                     |                                                         |          |                   |                              |                                   |        |    |  |
| Duration of postoperative pyrexia         |  | -0.44 (-0.68 to -0.192)  | 4                           |    | 38.1 |                                |                                     |                                                         |          |                   |                              |                                   |        |    |  |
| Fluid diet                                |  | -0.35 (-0.58 to -0.12)   | 3                           |    | 0.0  |                                |                                     |                                                         |          |                   |                              |                                   |        |    |  |
| Hospital stay                             |  | -0.48 (-0.66, -0.30)     | 10                          |    | 45.7 |                                |                                     |                                                         |          |                   |                              |                                   |        |    |  |
| ICU stay                                  |  | -0.10 (-0.36, 0.16)*     | 4                           |    | 0.0  |                                |                                     |                                                         |          |                   |                              |                                   |        |    |  |
| Operating time                            |  | 0.02 (-0.14 to 0.18)*    | 11                          |    | 49.0 |                                |                                     |                                                         |          |                   |                              |                                   |        |    |  |
| Solid diet                                |  | -0.31 (-0.50, -0.12)     | 4                           |    | 0.0  |                                |                                     |                                                         |          |                   |                              |                                   |        |    |  |



[illegible]



[illegible]

[illegible]

|                                                      |                        |   |      |      |                 |   |                                                                                                               |                                                                                          |                                   |                                                                                                                                                                                                                                 |                                                                                   |     |        |                 |
|------------------------------------------------------|------------------------|---|------|------|-----------------|---|---------------------------------------------------------------------------------------------------------------|------------------------------------------------------------------------------------------|-----------------------------------|---------------------------------------------------------------------------------------------------------------------------------------------------------------------------------------------------------------------------------|-----------------------------------------------------------------------------------|-----|--------|-----------------|
| score derived from other subjective ratings scales   | 0.08 (-0.14 to 0.30)*  | 8 | 549  | 36.0 |                 |   | (paraprobiotics) as a daily oral supplement (e.g., capsules/tablets, fermented milk, yoghurt, powder sachets) |                                                                                          | (nonrandomized controlled trials) |                                                                                                                                                                                                                                 | baseline                                                                          | SMD |        |                 |
| EDSS scores                                          | -1.22 (-2.40 to -0.03) | 3 | 173  | 92.0 | JIANG 2021[99]  | J | probiotic                                                                                                     | NP                                                                                       | All RCTs                          | Adult human participants with ages between 18 and 55 with clinically definite relapsing-remitting multiple sclerosis (RRMS), diagnosed according to McDonald criteria and an expanded disability status scale (EDSS) score ≤4.5 | probiotics vs. placebos                                                           | SMD | random | NP              |
| BDI total scores                                     | -1.58 (-3.03 to -0.12) | 3 | 173  | 94.0 |                 |   |                                                                                                               |                                                                                          |                                   |                                                                                                                                                                                                                                 |                                                                                   |     |        |                 |
| GHQ scores                                           | -0.71 (-1.02 to -0.40) | 3 | 173  | 0.0  |                 |   |                                                                                                               |                                                                                          |                                   |                                                                                                                                                                                                                                 |                                                                                   |     |        |                 |
| Physical Growth During the First Year of Life        | 1.07 (0.14 to 1.99) g  | 4 | 436  | 0.0  | RAO 2009[68]    | S | combination of prebiotics and probiotics vs controls                                                          | NP                                                                                       | All RCTs                          | full-term neonates                                                                                                                                                                                                              | formula had different composition vs. the control formula (apart from prebiotics) | WMD | fixed  | No serious bias |
| Incidence of infections requiring antibiotic therapy | 0.68 (0.61 to 0.77)    | 3 | 1122 | 0.0  | LOHNER 2014[69] | S | prebiotics (prebiotics added to food in the manufacturing process or as a separate supplement)                | a supplementation time of at least 2 months and an observation time of at least 4 months | All RCTs                          | healthy infants or children, aged 0–18 years                                                                                                                                                                                    | Vs. control (placebo or no supplementation)                                       | RR  | random | NP              |

|                                                           |                            |    |      |      |                       |     |                                                                                                                              |                    |                                               |                                                                                                             |                                                                    |        |        |                 |
|-----------------------------------------------------------|----------------------------|----|------|------|-----------------------|-----|------------------------------------------------------------------------------------------------------------------------------|--------------------|-----------------------------------------------|-------------------------------------------------------------------------------------------------------------|--------------------------------------------------------------------|--------|--------|-----------------|
| QoL, quality of life                                      | 0.06 (-0.14 to 0.25)       | 4  | 322  | 0.0  | WILSON 2019[70]       | B   | prebiotics                                                                                                                   | 2-12 weeks         | All RCTs                                      | Adult patients ≥18 and ≤64 y with Irritable bowel syndrome (IBS) or other Functional bowel disorders (FBDs) | vs. placebo                                                        | SMD    | random | No serious bias |
| Effects on sepsis                                         | 0.64 (0.51 to 0.78)        | 11 | 1106 | 0.0  | CHI 2019[71]          | C   | prebiotics                                                                                                                   | 7-57 days          | All RCTs                                      | low birth weight infants (<2500 g) or preterm infants (<36 weeks)                                           | vs. placebo                                                        | RR     | random | 0.80            |
| length of hospital stay                                   | -5.18 (-8.94 to -1.41)     | 8  | 733  | 83.0 |                       |     |                                                                                                                              |                    |                                               |                                                                                                             |                                                                    |        |        | 0.08            |
| BMI                                                       | -0.49 (-0.86 to -0.13)     | 4  | NP   | 41.3 | STACHOWSKA 2020[100]  | E   | treatment with prebiotic (soluble fiber or insoluble fiber) in the form of a supplement, e.g., pills, powder, etc.           | NP                 | All RCTs                                      | patients with confirmed non-alcoholic steatohepatitis (NASH)                                                | Vs. control                                                        | SMD    | random | 0.83            |
| liver stiffness measurement (LSM)                         | -0.70 (-1.00 to -0.40) kpa | 4  | 235  | 93.4 | SHARPTON SR 2019[101] |     | interventions in any of the following 4 categories: antibiotics, probiotics, synbiotics, or fecal microbiota transplantation | NP                 | All RCTs                                      | patients with nonalcoholic fatty liver disease (NAFLD)                                                      | Vs. placebo, usual care, or no intervention in patients with NAFLD | WMD OR | random | NP              |
| improvement in hepatic steatosis, as graded by ultrasound | 2.40 (1.50 to 3.84)        | 6  | 384  | 22.4 |                       |     |                                                                                                                              |                    |                                               |                                                                                                             |                                                                    |        |        |                 |
| SCORAD values at 8 weeks                                  | -6.56 (-11.43 to -1.68)    | 6  | NP   | 77.1 | CHANG 2016[102]       | Y   | synbiotics                                                                                                                   | NP                 | All RCTs                                      | patients with atopic dermatitis (AD)                                                                        | Vs. control                                                        | WMD    | random | NP              |
| Quality of Life                                           | -0.14(-0.45 to 0.17)*      | 3  | 159  | 0.0  | ZHU 2020[37]          | H F | treated with microecological preparations (probiotics, prebiotics, synbiotics, or a combination of two preparations)         | 15 days to 6months | All RCTs                                      | obese adults (age ≥18 years) who had undergone bariatric surgery (a type of surgery was not restricted)     | Vs. placebo or conventional treatment                              | SMD    | fixed  | NP              |
| Excess Weight Loss                                        | 0.45 (-0.16 to 1.05)*      | 4  | 154  | 68.0 |                       |     |                                                                                                                              |                    |                                               |                                                                                                             |                                                                    |        | random |                 |
| Infection Rates                                           | 0.46 (0.31 to 0.67)        | 11 | 913  | 43.0 | KAHN 2020[103]        | J   | pro-/synbiotics perioperatively                                                                                              | NP                 | Randomized and non-randomized control studies | Patients accepted liver resection (LR) or liver transplantation (LT).                                       | vs. controls                                                       | RR     | random | NP              |

|                                                                                          |                      |   |      |      |                      |                                                                                                                                                                                                                                                                                            |                     |                                                                   |                                                                                                   |                                              |            |        |      |
|------------------------------------------------------------------------------------------|----------------------|---|------|------|----------------------|--------------------------------------------------------------------------------------------------------------------------------------------------------------------------------------------------------------------------------------------------------------------------------------------|---------------------|-------------------------------------------------------------------|---------------------------------------------------------------------------------------------------|----------------------------------------------|------------|--------|------|
| the number of participants who experienced ≥1 Respiratory Tract Infections (RTI) episode | 0.84 (0.73 to 0.96)  | 9 | 2845 | 43.8 | CHAN C K Y 2020[104] | Synbiotics were all administered through oral ingestion and composed of ≥1 probiotic bacterial strain plus ≥1 type of prebiotics in different forms, such as powdered milk, yogurt, or capsules                                                                                            | 7 days to 12 months | randomized controlled trials (RCTs) and placebo-controlled trials | individuals of any age (including full-term infants) with no pretrial symptoms                    | Vs. without Synbiotics                       | Rate ratio | random | 0.20 |
| the proportion of participants experiencing RTIs                                         | 0.84 (0.74 to 0.95)  | 7 | 7273 | 47.7 |                      |                                                                                                                                                                                                                                                                                            |                     |                                                                   |                                                                                                   |                                              | Risk ratio |        | 0.55 |
| the proportion of infants who had infections                                             | 0.35 (0.19 to 0.67)  | 3 | NP   | 0.0  | SORENSEN K 2021[77]  | any amino acid formula (AAF) with synbiotics (AAF-Syn) or extensively hydrolysed formula (eHF) with synbiotics (eHF-Syn), Studies of infant formulae containing cow's milk protein, and eHF or AAF without synbiotics (including those with only a prebiotic or a probiotic) were excluded | 7 days to 12 months | All RCTs                                                          | infants and children aged <3 years with IgE or non IgE mediated Cow's milk protein allergy (CMPA) | AAF-Syn than with AAF alone                  | OR         | fixed  | NP   |
| septic complications                                                                     | 0.42 (0.23 to 0.75)  | 5 | NP   | NP   | Kinross JM 2013[105] | prebiotic,                                                                                                                                                                                                                                                                                 | NP                  | All RCTs                                                          | patients underwent abdominal surgery with the use of a prebi-                                     | Vs. either received a placebo or received no | OR         | random | 0.25 |
|                                                                                          | 0.25 (0.10 to 0.60)  | 9 |      |      |                      | synbiotic                                                                                                                                                                                                                                                                                  |                     |                                                                   |                                                                                                   |                                              |            |        | 0.08 |
| Postoperative Pneumonia                                                                  | 0.38 (0.07 to 2.03)  | 3 |      |      |                      | prebiotic,                                                                                                                                                                                                                                                                                 |                     |                                                                   | otic, probiotic, or a synbiotic agent                                                             |                                              |            |        | NA   |
|                                                                                          | 0.89 (0.31 to 2.55)  | 7 |      |      |                      | synbiotic                                                                                                                                                                                                                                                                                  |                     |                                                                   |                                                                                                   | therapy                                      |            |        | 0.14 |
| Wound Infection                                                                          | 0.73 (0.29 to 1.81)  | 3 |      |      |                      | prebiotic,                                                                                                                                                                                                                                                                                 |                     |                                                                   |                                                                                                   |                                              |            |        | NA   |
|                                                                                          | 0.48 (0.19 to 1.20)  | 7 |      |      |                      | synbiotic                                                                                                                                                                                                                                                                                  |                     |                                                                   |                                                                                                   |                                              |            |        | 0.14 |
| Urinary Tract Infection                                                                  | 0.54 (0.03 to 10.73) | 3 |      |      |                      | prebiotic,                                                                                                                                                                                                                                                                                 |                     |                                                                   |                                                                                                   |                                              |            |        | NA   |
|                                                                                          | 0.29 (0.07 to 1.16)  | 6 |      |      |                      | synbiotic                                                                                                                                                                                                                                                                                  |                     |                                                                   |                                                                                                   |                                              |            |        | 0.14 |
| Length of Hospital Stay                                                                  | -0.07(-0.55 to 0.42) | 7 |      |      |                      | synbiotic                                                                                                                                                                                                                                                                                  |                     |                                                                   |                                                                                                   |                                              | WMD        |        | 0.15 |
| Length of Antibiotic                                                                     | -1.71(-3.2 to -0.21) | 4 |      |      |                      | synbiotic                                                                                                                                                                                                                                                                                  |                     |                                                                   |                                                                                                   |                                              |            |        | 0.02 |

|                                                               |                       |    |           |      |                      |                                      |                                 |                            |                                                                                                                |                                                                                                                             |     |        |                 |  |
|---------------------------------------------------------------|-----------------------|----|-----------|------|----------------------|--------------------------------------|---------------------------------|----------------------------|----------------------------------------------------------------------------------------------------------------|-----------------------------------------------------------------------------------------------------------------------------|-----|--------|-----------------|--|
| Treatment                                                     |                       |    |           |      |                      |                                      |                                 |                            |                                                                                                                |                                                                                                                             |     |        |                 |  |
| Effect of probiotics on development of overt HE (week 4)      | 0.22 (0.07 to 0.67)   | 3  | 95/191    | 0.0  | CAO Q 2018 [11]      | Probiotic treatment                  | 4-12 weeks                      | All RCTs                   | Patients with Minimal hepatic encephalopathy (MHE)                                                             | Probiotic treatment vs placebo or no treatment                                                                              | OR  | random | NP              |  |
| Effect of probiotics on development of overt HE (week 12)     | 0.48 (0.21 to 1.12) * | 3  | 104/205   | 0.0  |                      |                                      |                                 |                            |                                                                                                                |                                                                                                                             |     |        |                 |  |
| Improvement in Minimal hepatic encephalopathy (MHE) (week 12) | 0.15 (0.07 to 0.32)   | 3  | 104/205   | 0.0  |                      |                                      |                                 |                            |                                                                                                                |                                                                                                                             |     |        |                 |  |
| Spinal bone mineral density (BMD)                             | 0.65 (-0.18 to 1.47)* | 4  | NP        | 90.3 | EJTAHED 2021[33]     | probiotic                            | NP                              | clinical trial             | adults                                                                                                         | Vs. control diets                                                                                                           | SMD | Random | No serious bias |  |
| total hip bone mineral density (BMD)                          | 1.45 (-0.38 to 3.28)* | 3  |           | 96.3 |                      |                                      |                                 |                            |                                                                                                                |                                                                                                                             |     |        |                 |  |
| Mortality                                                     |                       |    |           |      |                      |                                      |                                 |                            |                                                                                                                |                                                                                                                             |     |        |                 |  |
| All-cause mortality                                           | 0.58(0.23 to 1.44)*   | 7  | 404       | 0.0  | DALAL 2017 [10]      | R probiotics                         | follow-up: 2 weeks to 3 months) | randomised clinical trials | people with any grade of acute or chronic hepatic encephalopathy                                               | probiotics in any dosage vs. placebo or no intervention, or with any other treatment in people with hepatic encephalopathy. | RR  | random | NP              |  |
| Effects of Probiotics on Mortality                            | 0.77 (0.65 to 0.92)   | 27 | 4117/8156 | 16.0 |                      |                                      |                                 |                            |                                                                                                                |                                                                                                                             |     |        |                 |  |
|                                                               |                       |    |           |      | DERMYSHI E 2017 [85] | enteral administration of probiotics | NP                              | All RCTs                   | very low birth weight (VLBW)(<1,500 g) preterm (<34 weeks gestational age) infants with enteral administration | enteral administration of probiotics vs. Control group                                                                      | RR  | fixed  | 0.012           |  |



|                                                   |                       |    |           |      |                                |   |                                                                                  |                                                         |                     |                                                                                            |                                                                     |     |        |                 |
|---------------------------------------------------|-----------------------|----|-----------|------|--------------------------------|---|----------------------------------------------------------------------------------|---------------------------------------------------------|---------------------|--------------------------------------------------------------------------------------------|---------------------------------------------------------------------|-----|--------|-----------------|
|                                                   |                       |    |           |      |                                |   |                                                                                  |                                                         |                     | of probiotics initiated within 10 days                                                     |                                                                     |     |        |                 |
| Mortality (all-cause before hospital discharge)   | 0.76 (0.65 to 0.89)   | 51 | 10170     | 0.0  | SHARIF 2020 [106]              | S | any probiotic or probiotic combination for at least one week                     | at least one week                                       | RCTs and quasi-RCTs | very preterm (< 32 weeks' gestation) or very low birth weight (< 1500 g) infants           | any probiotic or probiotic combination vs. placebo or no treatment. | RR  | fixed  | 0.11            |
| Mortality (all-cause before hospital discharge)   | 0.91 (0.71 to 1.16)*  | 6  | 1661      | 0.0  |                                |   |                                                                                  |                                                         |                     | extremely preterm (< 28 weeks' gestation) or extremely low birth weight (< 1000 g) infants |                                                                     |     |        | NP              |
| mortality                                         | 0.58 (0.46 to 0.75)   | 14 | 1789/3583 | 4.5  | YANG Y 2014 [107]              |   | enteral administration of any probiotic started within the first 10 days of life | at least 7 days                                         | All RCTs            | preterm infants (without consideration of birth weight)                                    | probiotic vs. Placebo group                                         | RR  | fixed  | No obvious bias |
| The effect of probiotics in decreasing death rate | 0.69 (0.55 to 0.87)   | 27 | 4399/8717 | 36.2 | JIANG T L 2020 [108]           |   | probiotics                                                                       | NP                                                      | All RCTs            | preterm infants < 37 weeks and/or birth weight < 2500 g                                    | Probiotics vs. control                                              | RR  | random | No obvious bias |
|                                                   | 0.52 (0.34 to 0.80)   | 12 | 1635/3175 | 42.7 |                                |   | mixed probiotics                                                                 |                                                         |                     |                                                                                            |                                                                     |     |        |                 |
| Incidence of death.                               | 0.48 (0.36 to 0.64)   | 20 | 4286      | 0.0  | LIU D 2020[109]                | P | administration of Lactobacillus for preventing NEC                               | NP                                                      | All RCTs            | neonates of gestational age < 37 weeks                                                     | Lactobacillus with placebo                                          | RR  | fixed  | No obvious bias |
| Incidence of death.                               | 0.74 (0.60 to 0.92)   | 15 | 2579/5053 | 29.0 | ZHU X 2019[110]                | L | bifidobacteria treatment for preventing NEC                                      | NP                                                      | All RCTs            | neonates with gestational age (GA) < 37 weeks                                              | Bifidobacteria vs. control                                          | RR  | fixed  | NP              |
| Mortality                                         | 1.17 (0.54 to 2.57 )* | 7  | NP        | 20.4 | SKONIECZNA-ZYDECKA K 2018 [15] |   | treatment with pro-/pre-/synbiotics                                              | Preoperation 0-15 days, postoperation 0-until discharge | All RCTs            | surgical patients                                                                          | Probiotics vs. No probiotics                                        | SMD | random | NP              |
| mortality                                         | 0.58 (0.36 to 0.94)   | 9  | 924       | 0.0  | CHI 2019[71]                   | C | prebiotics                                                                       | 7-57 days                                               | All RCTs            | low birth weight infants (<2500 g)                                                         | vs. placebo                                                         | RR  | random | 0.73            |

|                                                            |                        |    |         |      |                      |                                                                                                                                                                                  |            |          |                                                                                                   |                                                                                     |                                |        |       |  |  |  |
|------------------------------------------------------------|------------------------|----|---------|------|----------------------|----------------------------------------------------------------------------------------------------------------------------------------------------------------------------------|------------|----------|---------------------------------------------------------------------------------------------------|-------------------------------------------------------------------------------------|--------------------------------|--------|-------|--|--|--|
|                                                            |                        |    |         |      |                      |                                                                                                                                                                                  |            |          |                                                                                                   |                                                                                     | or preterm infants (<36 weeks) |        |       |  |  |  |
| operative mortality                                        | 1.39 (0.57 to 3.44)*   | 5  | NP      | NP   | Kinross JM 2013[105] | probiotic                                                                                                                                                                        | NP         | All RCTs | patients underwent abdominal surgery with the use of a prebiotic, probiotic, or a synbiotic agent | Vs. either received a placebo or received a no therapy                              | WMD                            | random | NA    |  |  |  |
| Neurological and psychiatric outcomes                      |                        |    |         |      |                      |                                                                                                                                                                                  |            |          |                                                                                                   |                                                                                     |                                |        |       |  |  |  |
| effect of probiotics on cognition                          | 0.24 (0.05 to 0.42)    | 7  | NP      | 0.0  | LV 2021[111]         | T probiotics intervention (any dose, strain, or administration method)                                                                                                           | 8-12 weeks | All RCTs | adults age ≥18 years                                                                              | probiotics intervention (any dose, strain, or administration method) versus control | SMD                            | Random | NP    |  |  |  |
| cognitive function in individuals with Alzheimer’s disease | 0.56 (-0.06 to 1.18)*  | 3  | 82/161  | 73.0 | KRÜGER J F 2021[112] | Probiotic or synbiotic, orally or enterally administered, with no restriction on strains, doses, and frequency and duration of administration, provided information was reported | NP         | All RCTs | individuals with dementia who underwent an intervention with probiotics or synbiotics             | probiotics or synbiotics intervention versus control or placebo group               | SMD                            | Random | NP    |  |  |  |
| cognitive enhancement                                      | 0.37 (0.14 to 0.61)    | 5  | 154/297 | 24.0 | DENG H Y 2020 [9]    | Probiotic                                                                                                                                                                        | 12 weeks   | All RCTs | Adult human participants who had a diagnosis of AD or MCI (aged over 18 y)                        | Probiotics versus placebo                                                           | SMD                            | fixed  | 0.54  |  |  |  |
| alleviating anxiety                                        | -0.12 (-0.28 to 0.04)* | 12 | 1551    | 51.0 | LIU B 2018 [113]     | probiotics                                                                                                                                                                       | 4-24 weeks | All RCTs | Adult (≥ 18 y)                                                                                    | probiotics vs. placebo                                                              | SMD                            | random | 0.139 |  |  |  |

|                                                         |               |                        |    |      |      |                        |   |                                             |                     |                   |                                                                                                             |                        |     |        |                 |
|---------------------------------------------------------|---------------|------------------------|----|------|------|------------------------|---|---------------------------------------------|---------------------|-------------------|-------------------------------------------------------------------------------------------------------------|------------------------|-----|--------|-----------------|
| Preclinical symptoms of anxiety, depression, and stress | psychological | 0.34 (0.07 to 0.61)    | 9  | 785  | 67.0 | MCKEAN 2017[114]       | J | probiotics                                  | 21-56 days          | All RCTs          | adult healthy volunteers (aged ≥ 18 years)                                                                  | probiotics vs. placebo | SMD | random | NP              |
| depressive symptoms                                     |               | -0.31 (-0.56 to -0.07) | 19 | 1901 | 82.0 | GOH 2019 [115]         | K | probiotics                                  | 4-20 weeks          | All RCTs          | general population or clinical population                                                                   | probiotics vs. placebo | SMD | random | No serious bias |
|                                                         |               | -0.75 (-1.09 to -0.41) | 3  | 144  | 0.0  |                        |   |                                             |                     |                   | patients with major depressive disorder                                                                     |                        |     |        |                 |
|                                                         |               | -0.26 (-0.70 to -0.17) | 7  | 722  | 84.0 |                        |   |                                             |                     |                   | Other clinical diagnosis population                                                                         |                        |     |        |                 |
|                                                         |               | -0.25 (-0.60 to 0.11)* | 12 | 1035 | 82.0 |                        |   |                                             |                     |                   | Health population                                                                                           |                        |     |        |                 |
|                                                         |               | -0.01 (-0.30 to 0.27)* | 11 | 1070 | 71.0 |                        |   | Single probiotics                           | strain              |                   | general population or clinical population                                                                   |                        |     |        |                 |
|                                                         |               | -0.57 (-0.96 to -0.18) | 13 | 831  | 85.0 |                        |   | multiple probiotics                         | strain              |                   |                                                                                                             |                        |     |        |                 |
| schizophrenia symptoms (total PANSS score)              |               | -0.09 (-0.38 to 0.20)* | 3  | 172  | 0.0  | NG 2019[116]           | Q | probiotic                                   | NP                  | All RCTs          | patients with at least moderately severe psychotic symptoms, aged 18–65 years                               | probiotics vs. Placebo | SMD | fixed  | NA              |
| Subjective stress level                                 |               | -0.14 (-0.27 to -0.01) | 6  | 1043 | 0.0  | ZHANG 2020[117]        | N | Probiotics                                  | 30 days to 24 weeks | All RCTs          | participants were in a healthy state, without known major health problems                                   | probiotics vs placebo  | SMD | fixed  | NA              |
| Stress-related subthreshold anxiety/depression level    |               | -0.13 (-0.26 to -0.00) | 9  | 940  | 11.0 |                        |   |                                             |                     |                   |                                                                                                             |                        |     |        |                 |
| Anxiety                                                 |               | -0.23 (-0.54 to 0.08)* | 3  | 171  | 0.0  | WILSON 2019[70]        | B | prebiotics                                  | 2-12 weeks          | All RCTs          | Adult patients ≥18 and ≤64 y with Irritable bowel syndrome (IBS) or other Functional bowel disorders (FBDs) | vs. placebo            | SMD | random | No serious bias |
| continuous outcomes                                     | anxiety       | -0.03(-0.21 to 0.14)*  | 5  | 617  | 12.0 | COHEN KADOSH 2021[118] | K | pro- or prebiotic administration (any form) | 8-84 days           | Controlled trials | Mean age in the range of 10–24 years old                                                                    | vs. controls           | SMD | random | NP              |



[illegible]

|                                                                        |                                                            |          |                        |              |                         |                                                           |    |          |                                                         |                                                                                                     |                                                            |            |                     |
|------------------------------------------------------------------------|------------------------------------------------------------|----------|------------------------|--------------|-------------------------|-----------------------------------------------------------|----|----------|---------------------------------------------------------|-----------------------------------------------------------------------------------------------------|------------------------------------------------------------|------------|---------------------|
| age reaching full feeds                                                | -1.66 (-3.60 to 0.27)*                                     | 9        | 821/1621               | 89.9         |                         |                                                           |    |          |                                                         |                                                                                                     | WMD                                                        | rando<br>m |                     |
| The effect of probiotics in preventing stage II-III severe NEC         | 0.51 (0.38 to 0.67)<br>0.39 (0.26 to 0.57)                 | 27<br>11 | 4491/8901<br>1590/3083 | 28.4<br>0.0  | JIANG T L<br>2020 [108] | probiotics<br>mixed probiotics                            | NP | All RCTs | preterm infants < 37 weeks and/or birth weight < 2500 g | Probiotics vs. control                                                                              | RR                                                         | rando<br>m | No obvi<br>ous bias |
| The effect of probiotics in decreasing death rate                      | 0.69 (0.55 to 0.87)<br>0.52 (0.34 to 0.80)                 | 27<br>12 | 4399/8717<br>1635/3175 | 36.2<br>42.7 |                         | probiotics<br>mixed probiotics                            |    |          |                                                         |                                                                                                     |                                                            |            |                     |
| incidence of Hirschsprung-associated enterocolitis (HAEC)              | 0.72 (0.37 to 1.39)*                                       | 5        | 93/198                 | 37.0         |                         | probiotics                                                | NP | NP       | premature infants                                       | Probiotics vs. control                                                                              | OR                                                         | fixed      | NP                  |
| Incidence of Bell stage ≥ II NEC                                       | 0.34 (0.25 to 0.46)                                        | 23       | 2359/4686              | 0.0          |                         | administration of Lactobacillus for preventing NEC        | NP | All RCTs | neonates of gestational age < 37 weeks                  | Lactobacillus with placebo                                                                          | RR                                                         | fixed      | No obvi<br>ous bias |
| Incidence of sepsis                                                    | 0.90 (0.72 to 1.12)*                                       | 10       | 2129                   | 41.0         |                         |                                                           |    |          |                                                         |                                                                                                     |                                                            | rando<br>m |                     |
| Incidence of death.                                                    | 0.48 (0.36 to 0.64)                                        | 20       | 4286                   | 0.0          |                         |                                                           |    |          |                                                         |                                                                                                     |                                                            | fixed      |                     |
| Incidence of NEC Stage ≥ II (Bell staging criteria)                    | 0.38 (0.25 to 0.58)                                        | 20       | 2836/5568              | 43.0         | ZHU X L<br>2019[110]    | bifidobacteria treatment for preventing NEC               | NP | All RCTs | neonates with gestational age (GA) < 37 weeks           | Bifidobacteria vs. control                                                                          | RR                                                         | rando<br>m | NP                  |
| Incidence of sepsis                                                    | 0.87 (0.73 to 1.03)*                                       | 17       | 2075/4034              | 43.0         |                         |                                                           |    |          |                                                         |                                                                                                     |                                                            |            |                     |
| Incidence of death.                                                    | 0.74 (0.60 to 0.92)                                        | 15       | 2579/5053              | 29.0         |                         |                                                           |    |          |                                                         |                                                                                                     |                                                            | fixed      |                     |
| infant crying/distress, measured as duration or the number of episodes | -65.10 (-85.85 to -44.38)<br><br>-67.72 (-99.79 to -35.64) | 3<br>3   | 209<br>209             | 55.0<br>70.0 | SUNG V 2013<br>[123]    | probiotics                                                | NP | All RCTs | infants who were younger than 3 months                  | oral probiotic supplementation vs. placebo or standard care or no care                              | Media<br>n<br>Differe<br>nce<br><br>Mean<br>Differe<br>nce | Rando<br>m | NP                  |
| Preterm birth < 37 weeks' gestation                                    | 0.92(0.32 to 2.67)*                                        | 4        | 518                    | 14.0         |                         | Before delivery (probiotics given only prior to delivery) | NP | All RCTs | pregnant women                                          | probiotics administered to pregnant women (< 36 weeks' gestation) versus placebo or no intervention | RR                                                         | fixed      | NP                  |
| Newborn Birth Weight*                                                  | -10.27 (-90.17 to 69.63)*                                  | 7        | 1093                   | 34.0         | WANG C C                | probiotic or                                              | NP | All RCTs | Pregnant women                                          | probiotic                                                                                           | SMD                                                        | rando      | 0.60                |



[illegible]



|                                     |                           |    |           |      |                         |   |                                                                           |             |          |                                                                                                                                                                                                           |                                                                                   |    |        |                 |
|-------------------------------------|---------------------------|----|-----------|------|-------------------------|---|---------------------------------------------------------------------------|-------------|----------|-----------------------------------------------------------------------------------------------------------------------------------------------------------------------------------------------------------|-----------------------------------------------------------------------------------|----|--------|-----------------|
| incidence of pre-eclampsia          | 0.89 (0.32 to 2.46)       | 3  | 217       | 0.0  |                         |   |                                                                           |             |          |                                                                                                                                                                                                           | probiotics vs. control                                                            | OR |        |                 |
| gestational age at delivery         | 0.04 (-0.30 to 0.38) week | 4  | 301       | 0.0  |                         |   |                                                                           |             |          |                                                                                                                                                                                                           | probiotics vs. placebo                                                            | MD |        |                 |
| the likelihood of cesarean delivery | 0.66 (0.34 to 1.29)*      | 4  | 301       | 39.0 |                         |   |                                                                           |             |          |                                                                                                                                                                                                           |                                                                                   | OR |        |                 |
| macrosomia                          | 0.42 (0.19 to 0.94)       | 5  | 361       | 12.0 |                         |   |                                                                           |             |          |                                                                                                                                                                                                           |                                                                                   |    |        |                 |
| newborns' hospitalization           | 0.37 (0.18 to 0.74)       | 4  | 301       | 6.0  |                         |   |                                                                           |             |          |                                                                                                                                                                                                           |                                                                                   |    |        |                 |
| babies with hypoglycemia at birth   | 0.68 (0.28 to 1.64)*      | 3  | 174       | 0.0  |                         |   |                                                                           |             |          |                                                                                                                                                                                                           | probiotics vs. control                                                            |    |        |                 |
| Infant Eczema                       | 0.60 (0.47 to 0.78)       | 10 | 2093      | 67.0 | SUN 2021[129]           | M | a mixture of Lactobacillus and Bifidobacterium                            | 0.5-2 years | All RCTs | healthy or pregnant women and infants under three years old with a family history of atopic disease                                                                                                       | Vs. placebo intervention, and no other probiotic interventions or no intervention | RR | random | NP              |
| Occurrence of Adverse Events        | 1.09 (0.83 to 1.44)*      | 6  | 1309      | 0.0  |                         |   |                                                                           |             |          |                                                                                                                                                                                                           |                                                                                   |    |        |                 |
| the risk of eczema in children      | 0.90 (0.67 to 1.21)*      | 5  | 778       | 45.0 | Szajewska 2018[130]     | H | Lactobacillus rhamnosus GG regardless of the timing of LGG administration | NP          | All RCTs | healthy pregnant women at high risk for having an allergic child; (2) breastfeeding mothers of infants at high risk of developing allergy; or (3) healthy term infants at high risk of developing allergy | vs. placebo or no intervention                                                    | RR | random | NA              |
| Side effects                        |                           |    |           |      |                         |   |                                                                           |             |          |                                                                                                                                                                                                           |                                                                                   |    |        |                 |
| Incidence of adverse events         | 0.83 (0.71 to 0.97)       | 32 | 4329/8305 | 49.0 | GOLDENBERG J Z 2017[38] |   | probiotics                                                                | NP          | All RCTs | participants taking antibiotics                                                                                                                                                                           | any versus none                                                                   | RR | random | No serious bias |
| Adverse Events                      | 0.97 (0.86 to 1.09)*      | 15 | 6431      | NP   | SHEN N T 2017[40]       |   | probiotics                                                                | NP          | All RCTs | Hospitalized adults (18 years or older)                                                                                                                                                                   | any versus none                                                                   | RR | random | NP              |

|                                                         |                       |    |           |      |                       |                                                                                                                                                                                                                             |                                |                            |                                                                  |                                                                                                |                                                                          |        |                 |  |  |
|---------------------------------------------------------|-----------------------|----|-----------|------|-----------------------|-----------------------------------------------------------------------------------------------------------------------------------------------------------------------------------------------------------------------------|--------------------------------|----------------------------|------------------------------------------------------------------|------------------------------------------------------------------------------------------------|--------------------------------------------------------------------------|--------|-----------------|--|--|
|                                                         |                       |    |           |      |                       |                                                                                                                                                                                                                             |                                |                            |                                                                  |                                                                                                | receiving antibiotic therapy (intravenous, oral, or both) for any reason |        |                 |  |  |
| Incidence of Adverse Events                             | 0.82(0.65 to 1.05)*   | 17 | 166/1783  | 18.0 | JOHNSTON B C 2012[41] | any dose of a specified probiotic of any strain                                                                                                                                                                             | NP                             | All RCTs                   | adult or pediatric patients treated with antibiotics             | any versus none                                                                                | RR                                                                       | random | No serious bias |  |  |
| the side effects observed in EcN treatment.             | 1.44(0.80 to 2.59)*   | 6  | 719       | 48.0 | LOSURDO G 2015[46]    | Escherichia coli Nissle ( EcN) 1917                                                                                                                                                                                         | NP                             | All RCTs                   | Patients with UC                                                 | EcN versus standard of care (mesalazine or ciprofloxacin)                                      | OR                                                                       | Random | No serious bias |  |  |
| Adverse events                                          | 0.00 (-0.01 to 0.01)* | 24 | 4415      | 75.0 | GUO Q 2019 [50]       | specific, identified probiotic in any form (e.g. capsule, sachet, yogurt). Trials investigating non-specific probiotic or yogurt agents (e.g. products that do not label the probiotic strain and dose) were not considered | 5 days to 4 weeks              | All RCTs                   | children (0 to 18 years) receiving antibiotics                   | Probiotic Versus Control                                                                       | RD(RD: Risk difference)                                                  | Random | No serious bias |  |  |
| Incidence of Adverse Events                             | 0.00 (-0.02 to 0.02)* | 7  | 1183/2363 | 66.0 | BLAABJERGS 2017[52]   | Probiotics                                                                                                                                                                                                                  | NA                             | All RCTs                   | outpatients taking oral antibiotics                              | probiotics vs. Placebo or no treatment                                                         | RD (risk difference)                                                     | random | NP              |  |  |
| Adverse events - Overt hepatic encephalopathy           | 0.29(0.16 to 0.51)*   | 10 | 585       | 0.0  | DALAL R 2017 [10]     | probiotics                                                                                                                                                                                                                  | follow-up: 2 weeks to 3 months | randomised clinical trials | people with any grade of acute or chronic hepatic encephalopathy | probiotics in any dosage vs. placebo or no intervention, or with any other treatment in people | RR                                                                       | random | NP              |  |  |
| Adverse events - Change of/or withdrawal from treatment | 0.70(0.46 to 1.07)*   | 9  | 551       | 11.0 |                       |                                                                                                                                                                                                                             | follow-up: 1 month to 3        |                            |                                                                  |                                                                                                |                                                                          |        |                 |  |  |

|                                                                  |                        |    |         |      | months             |     |                                                                                                         |                                                          |                   | with<br>hepatic<br>encephalo<br>pathy.                                                                                           |                                               |    |            |                           |  |
|------------------------------------------------------------------|------------------------|----|---------|------|--------------------|-----|---------------------------------------------------------------------------------------------------------|----------------------------------------------------------|-------------------|----------------------------------------------------------------------------------------------------------------------------------|-----------------------------------------------|----|------------|---------------------------|--|
| any adverse event                                                | 1.09 (0.91 to 1.29)*   | 36 | 4183    | 36.0 | FORD<br>2018[56]   | A C | probiotics                                                                                              | Minimu<br>m<br>treatme<br>nt<br>duration<br>of 7<br>days | All RCTs          | Adults<br>(participants<br>aged >16 years)                                                                                       | probiotics<br>vs. Control<br>group            | RR | rando<br>m | 0.08                      |  |
| Adverse events in active UC                                      | 1.21 (0.64 to 2.27)*   | 6  | 281/507 | -    | DERWA<br>2017 [54] | Y   | probiotics                                                                                              | NP                                                       | All RCTs          | Adults (>90% of<br>patients<br>aged >16 years)<br>with<br>inflammatory<br>bowel disease                                          | probiotics<br>vs. placebo                     | RR | rando<br>m | NA                        |  |
| Adverse events in quiescent UC                                   | 1.09 (0.71 to 1.67)*   | 3  | 277/555 | -    |                    |     |                                                                                                         |                                                          |                   |                                                                                                                                  | Probiotics<br>vs. 5-ASA                       |    |            |                           |  |
| Adverse events in CD in remission following a surgical resection | 0.81 (0.61 tp 1.08)*   | 3  | 129/263 | -    |                    |     |                                                                                                         |                                                          |                   |                                                                                                                                  | probiotics<br>vs. placebo                     |    |            |                           |  |
| the incidence of adverse effect                                  | 0.80 (0.43 to 1.50)*   | 10 | 762     | 0.0  | YEH<br>2018[91]    | T L | probiotics<br>prebiotics                                                                                | or NP                                                    | Control<br>trials | adults                                                                                                                           | probiotics<br>or<br>prebiotics<br>vs. placebo | OR | rando<br>m | No<br>serio<br>us<br>bias |  |
| Number of adverse events, dichotomous outcome                    | -0.00 (-0.03 to 0.03)* | 6  | 279     | 0.0  | SEILER<br>2020[75] | C L | Probiotics of any<br>type and dose,<br>administered<br>orally in any form<br>(drink/<br>powder/capsule) | at least 2<br>weeks                                      | All RCTs          | Patients with<br>Celiac disease<br>(CD)                                                                                          | probiotics<br>vs placebo                      | MD | rando<br>m | NP                        |  |
| Adverse events                                                   | 0.77 (0.47 to 1.26)*   | 4  | 355     | 0.0  | WILSON<br>2019[70] | B   | probiotics                                                                                              | 2-12<br>weeks                                            | All RCTs          | Adult patients<br>≥18 and ≤64 y<br>with Irritable<br>bowel syndrome<br>(IBS) or other<br>Functional<br>bowel disorders<br>(FBDs) | vs. placebo                                   | OR | rando<br>m | No<br>serio<br>us<br>bias |  |

|                |                      |    |      |     |                    |   |                                              |                    |          |                                                                                      |             |    |       |                       |
|----------------|----------------------|----|------|-----|--------------------|---|----------------------------------------------|--------------------|----------|--------------------------------------------------------------------------------------|-------------|----|-------|-----------------------|
| Adverse events | 0.27 (0.07 to 1.05)* | 5  | 409  | 0.0 | Zhang<br>2020[76]  | J | prebiotics,<br>probiotics,<br>and synbiotics | At least<br>7 days | All RCTs | adult patients<br>(over the age of<br>16 years) with<br>functional<br>dyspepsia (FD) | Vs. placebo | RR | fixed | NP                    |
| adverse events | 0.72 (0.55 to 0.94)  | 30 | 2430 | NP  | Sohail<br>2018[72] | G | probiotic<br>Medilac-S                       | 4-96<br>weeks      | All RCTs | human                                                                                | Vs. control | RR | fixed | No<br>serious<br>bias |

\* No statistical significance; CI, confidence interval; RCT, randomized controlled trial; RR, relative risk; HR, hazard ratio; MD, mean difference; SMD, standard mean difference; WMD, weighted mean difference; OR, odds ratio; NA, not available; NP, not published.

## References

1. Beserra, B.T.S.; Fernandes, R.; Do Rosario, V.A.; Mocellin, M.C.; Kuntz, M.G.F.; Trindade, E.B.S.M. A systematic review and meta-analysis of the prebiotics and synbiotics effects on glycaemia, insulin concentrations and lipid parameters in adult patients with overweight or obesity. *Clin. Nutr.* **2015**, *34*, 845-858, doi: 10.1016/j.clnu.2014.10.004.
2. Chen, X.; Hu, Y.; Yuan, X.; Yang, J.; Ka, L. Effect of early enteral nutrition combined with probiotics in patients with stroke: a meta-analysis of randomized controlled trials. *Eur. J. Clin. Nutr.* **2022**, *76*, 592-603, doi: 10.1038/s41430-021-00986-3.
3. Yan, S.M.; Tian, Z.W.; Li, M.; Li, B.; Cui, W.W. Effects of probiotic supplementation on the regulation of blood lipid levels in overweight or obese subjects: a meta-analysis. *Food Funct.* **2019**, *10*, 1747-1759, doi: 10.1039/c8fo02163e.
4. Wang, Z.; Xin, S.; Ding, L.; Ding, W.; Hou, Y.; Liu, C.; Zhang, X. The Potential Role of Probiotics in Controlling Overweight/Obesity and Associated Metabolic Parameters in Adults: A Systematic Review and Meta-Analysis. *Evid.-Based Compl. Alt.* **2019**, *2019*, 1-14, doi: 10.1155/2019/3862971.
5. Pontes, K.S.D.S.; Guedes, M.R.; Cunha, M.R.D.; Mattos, S.D.S.; Barreto Silva, M.I.; Neves, M.F.; Marques, B.C.A.A.; Klein, M.R.S.T. Effects of probiotics on body adiposity and cardiovascular risk markers in individuals with overweight and obesity: A systematic review and meta-analysis of randomized controlled trials. *Clin. Nutr.* **2021**, *40*, 4915-4931, doi: 10.1016/j.clnu.2021.06.023.
6. Rouhani, M.H.; Hadi, A.; Ghaedi, E.; Salehi, M.; Mahdavi, A.; Mohammadi, H. Do probiotics, prebiotics and synbiotics affect adiponectin and leptin in adults? A systematic review and meta-analysis of clinical trials. *Clin. Nutr.* **2019**, *38*, 2031-2037, doi: 10.1016/j.clnu.2018.09.033.
7. Cozzolino, M.; Vitagliano, A.; Pellegrini, L.; Chiurazzi, M.; Andriasani, A.; Ambrosini, G.; Garrido, N. Therapy with probiotics and synbiotics for polycystic ovarian syndrome: a systematic review and meta-analysis. *Eur. J. Nutr.* **2020**, *59*, 2841-2856, doi: 10.1007/s00394-020-02233-0.

8. Li, Y.; Tan, Y.; Xia, G.; Shuai, J. Effects of probiotics, prebiotics, and synbiotics on polycystic ovary syndrome: a systematic review and meta-analysis. *Crit. Rev. Food Sci.* **2021**, 1-17, doi: 10.1080/10408398.2021.1951155.
9. Den, H.; Dong, X.; Chen, M.; Zou, Z. Efficacy of probiotics on cognition, and biomarkers of inflammation and oxidative stress in adults with Alzheimer's disease or mild cognitive impairment — a meta-analysis of randomized controlled trials. *Aging* **2020**, 12, 4010-4039, doi: 10.18632/aging.102810.
10. Dalal, R.; McGee, R.G.; Riordan, S.M.; Webster, A.C. Probiotics for people with hepatic encephalopathy. *Cochrane Db. Syst. Rev.* **2021**, 2021, doi: 10.1002/14651858.CD008716.pub3.
11. Cao, Q.; Yu, C.; Yang, S.; Cao, H.; Chen, P.; Deng, M.; Li, L. Effect of probiotic treatment on cirrhotic patients with minimal hepatic encephalopathy: A meta-analysis. *Hepatob. Pancreat. Dis.* **2018**, 17, 9-16, doi: 10.1016/j.hbpd.2018.01.005.
12. Khalesi, S.; Johnson, D.W.; Campbell, K.; Williams, S.; Fenning, A.; Saluja, S.; Irwin, C. Effect of probiotics and synbiotics consumption on serum concentrations of liver function test enzymes: a systematic review and meta-analysis. *Eur. J. Nutr.* **2018**, 57, 2037-2053, doi: 10.1007/s00394-017-1568-y.
13. Loman, B.R.; Hernández-Saavedra, D.; An, R.; Rector, R.S. Prebiotic and probiotic treatment of nonalcoholic fatty liver disease: a systematic review and meta-analysis. *Nutr. Rev.* **2018**, 76, 822-839, doi: 10.1093/nutrit/nuy031.
14. Khan, M.Y.; Mihali, A.B.; Rawala, M.S.; Aslam, A.; Siddiqui, W.J. The promising role of probiotic and synbiotic therapy in aminotransferase levels and inflammatory markers in patients with nonalcoholic fatty liver disease – a systematic review and meta-analysis. *Eur. J. Gastroen. Hepat.* **2019**, 31, 703-715, doi: 10.1097/MEG.0000000000001371.
15. Skonieczna-żydecka, K.; Kaczmarczyk, M.; Ióniewski, I.; Lara, L.; Koulaouzidis, A.; Misera, A.; Maciejewska, D.; Marlicz, W. A Systematic Review, Meta-Analysis, and Meta-Regression Evaluating the Efficacy and Mechanisms of Action of Probiotics and Synbiotics in the Prevention of Surgical Site Infections and Surgery-Related Complications. *Journal of Clinical Medicine* **2018**, 7, 556, doi: 10.3390/jcm7120556.
16. Milajerdi, A.; Mousavi, S.M.; Sadeghi, A.; Salari-Moghaddam, A.; Parohan, M.; Larijani, B.; Esmailzadeh, A. The effect of probiotics on inflammatory biomarkers: a meta-analysis of randomized clinical trials. *Eur. J. Nutr.* **2020**, 59, 633-649, doi: 10.1007/s00394-019-01931-8.
17. Pan, H.; Li, R.; Li, T.; Wang, J.; Liu, L. Whether Probiotic Supplementation Benefits Rheumatoid Arthritis Patients: A Systematic Review and Meta-Analysis. *Engineering* **2017**, 3, 115-121, doi: 10.1016/J.ENG.2017.01.006.
18. Fu, Y.; Chu, Q.; Ashuro, A.A.; Di, D.; Zhang, Q.; Liu, X.; Fan, Y. The Effect of Probiotics, Prebiotics, and Synbiotics on CD4 Counts in HIV-Infected Patients: A Systematic Review and Meta-Analysis. *Biomed Res. Int.* **2020**, 2020, 1-11, doi: 10.1155/2020/7947342.
19. Zhang, X.; Chen, M.; Geng, S.; Yu, J.; Kuang, Y.; Luo, H.; Wang, K. Effects of Probiotics on Diarrhea and CD4 Cell Count in People Living With HIV: A Systematic Review and Meta-Analysis. *Frontiers in Pharmacology* **2021**, 12, 570520, doi: 10.3389/fphar.2021.570520.
20. Tavakoly, R.; Hadi, A.; Rafie, N.; Talaei, B.; Marx, W.; Arab, A. Effect of Probiotic Consumption on Immune Response in Athletes: A Meta-analysis. *Int. J. Sports Med.* **2021**, 42, 769-781, doi: 10.1055/a-1463-3303.
21. Askari, G.; Ghavami, A.; Shahdadian, F.; Moravejolahkami, A.R. Effect of synbiotics and probiotics supplementation on autoimmune diseases: A systematic review and meta-analysis of clinical trials. *Clin. Nutr.* **2021**, 40, 3221-3234, doi: 10.1016/j.clnu.2021.02.015.
22. Jia, L.; Jia, Q.; Yang, J.; Jia, R.; Zhang, H. Efficacy of Probiotics Supplementation On Chronic Kidney Disease: a Systematic Review and Meta-Analysis. *Kidney and Blood Pressure Research* **2018**, 43, 1623-1635, doi: 10.1159/000494677.

23. Tao, S.B.; Tao, S.Y.; Cheng, Y.M.; Liu, J.; Ma, L.; Fu, P. Effects of probiotic supplements on the progression of chronic kidney disease: A meta-analysis. *Nephrology* **2019**, *24*, 1122-1130, doi: 10.1111/nep.13549.
24. Thongprayoon, C.; Kaewput, W.; Hatch, S.T.; Bathini, T.; Sharma, K.; Wijarnpreecha, K.; Ungprasert, P.; D Costa, M.; Mao, M.A.; Cheungpasitporn, W. Effects of Probiotics on Inflammation and Uremic Toxins Among Patients on Dialysis: A Systematic Review and Meta-Analysis. *Digest. Dis. Sci.* **2019**, *64*, 469-479, doi: 10.1007/s10620-018-5243-9.
25. Bakhtiary, M.; Morvaridzadeh, M.; Agah, S.; Rahimlou, M.; Christopher, E.; Zadro, J.R.; Heshmati, J. Effect of Probiotic, Prebiotic, and Synbiotic Supplementation on Cardiometabolic and Oxidative Stress Parameters in Patients With Chronic Kidney Disease: A Systematic Review and Meta-analysis. *Clin. Ther.* **2021**, *43*, e71-e96, doi: 10.1016/j.clinthera.2020.12.021.
26. Mcfarlane, C.; Ramos, C.I.; Johnson, D.W.; Campbell, K.L. Prebiotic, Probiotic, and Synbiotic Supplementation in Chronic Kidney Disease: A Systematic Review and Meta-analysis. *J. Renal Nutr.* **2019**, *29*, 209-220, doi: 10.1053/j.jrn.2018.08.008.
27. Bock, P.M.; Telo, G.H.; Ramalho, R.; Sbaraini, M.; Leivas, G.; Martins, A.F.; Schaan, B.D. The effect of probiotics, prebiotics or synbiotics on metabolic outcomes in individuals with diabetes: a systematic review and meta-analysis. *Diabetologia* **2021**, *64*, 26-41, doi: 10.1007/s00125-020-05295-1.
28. Zheng, H.J.; Guo, J.; Jia, Q.; Huang, Y.S.; Huang, W.; Zhang, W.; Zhang, F.; Liu, W.J.; Wang, Y. The effect of probiotic and synbiotic supplementation on biomarkers of inflammation and oxidative stress in diabetic patients: A systematic review and meta-analysis of randomized controlled trials. *Pharmacol. Res.* **2019**, *142*, 303-313, doi: 10.1016/j.phrs.2019.02.016.
29. Tao, Y.; Gu, Y.; Mao, X.; Zhang, L.; Pei, Y. Effects of probiotics on type II diabetes mellitus: a meta-analysis. *J. Transl. Med.* **2020**, *18*, 30, doi: 10.1186/s12967-020-02213-2.
30. Chi, C.; Li, C.; Wu, D.; Buys, N.; Wang, W.; Fan, H.; Sun, J. Effects of Probiotics on Patients with Hypertension: a Systematic Review and Meta-Analysis. *Curr. Hypertens. Rep.* **2020**, *22*, doi: 10.1007/s11906-020-01042-4.
31. Hadi, A.; Arab, A.; Khalesi, S.; Rafie, N.; Kafeshani, M.; Kazemi, M. Effects of probiotic supplementation on anthropometric and metabolic characteristics in adults with metabolic syndrome: A systematic review and meta-analysis of randomized clinical trials. *Clin. Nutr.* **2021**, *40*, 4662-4673, doi: 10.1016/j.clnu.2021.05.027.
32. As Habi, A.; Nazari, M.; Hajianfar, H.; Arab, A.; Faghfoori, Z. A systematic review and meta-analysis of probiotic consumption and metabolic status of athletes. *Int. J. Food Prop.* **2020**, *23*, 941-954, doi: 10.1080/10942912.2020.1772286.
33. Malmir, H.; Ejtahed, H.; Soroush, A.; Mortazavian, A.M.; Fahimfar, N.; Ostovar, A.; Esmailzadeh, A.; Larijani, B.; Hasani-Ranjbar, S. Probiotics as a New Regulator for Bone Health: A Systematic Review and Meta-Analysis. *Evid.-Based Compl. Alt.* **2021**, *2021*, 1-35, doi: 10.1155/2021/3582989.
34. Mcloughlin, R.F.; Berthon, B.S.; Jensen, M.E.; Baines, K.J.; Wood, L.G. Short-chain fatty acids, prebiotics, synbiotics, and systemic inflammation: a systematic review and meta-analysis. *The American Journal of Clinical Nutrition* **2017**, *106*, n156265, doi: 10.3945/ajcn.117.156265.
35. Da Silva Borges, D.; Fernandes, R.; Thives Mello, A.; Da Silva Fontoura, E.; Soares Dos Santos, A.R.; Santos De Moraes Trindade, E.B. Prebiotics may reduce serum concentrations of C-reactive protein and ghrelin in overweight and obese adults: a systematic review and meta-analysis. *Nutr. Rev.* **2019**, *78*, 235-248, doi: 10.1093/nutrit/nuz045.
36. Qu, H.; Zhang, Y.; Chai, H.; Gao, Z.; Shi, D. Effects of microbiota-driven therapy on inflammatory responses in elderly individuals: A systematic review and meta-analysis. *PLoS One* **2019**, *14*, e211233, doi: 10.1371/journal.pone.0211233.
37. Zhu, H.; Ren, Z.; Zang, Y.; Hua, H.; Lu, J.; Xu, Q.; Zhu, S. Effects of Microecological Preparations on Obese Patients after Bariatric Surgery: A Systematic Review and Meta-Analysis. *Evid.-Based Compl. Alt.* **2020**, *2020*, 1-10, doi: 10.1155/2020/8724546.

38. Goldenberg, J.Z.; Yap, C.; Lytvyn, L.; Lo, C.K.; Beardsley, J.; Mertz, D.; Johnston, B.C. Probiotics for the prevention of *Clostridium difficile*-associated diarrhea in adults and children. *Cochrane Db. Syst. Rev.* **2017**, 2017, D6095, doi: 10.1002/14651858.CD006095.pub4.
39. Wu, Z.J.; DU X; Zheng, J. Role of *Lactobacillus* in the prevention of *Clostridium difficile*-associated diarrhea: a meta-analysis of randomized controlled trials. *Chin Med J (Engl)* **2013**, 126, 4154-4161.
40. Shen, N.T.; Maw, A.; Tmanova, L.L.; Pino, A.; Ancy, K.; Crawford, C.V.; Simon, M.S.; Evans, A.T. Timely Use of Probiotics in Hospitalized Adults Prevents *Clostridium difficile* Infection: A Systematic Review With Meta-Regression Analysis. *Gastroenterology* **2017**, 152, 1889-1900, doi: 10.1053/j.gastro.2017.02.003.
41. Johnston, B.C.; Ma, S.S.Y.; Goldenberg, J.Z.; Thorlund, K.; Vandvik, P.O.; Loeb, M.; Guyatt, G.H. Probiotics for the Prevention of *Clostridium difficile* Associated Diarrhea. *Ann. Intern. Med.* **2012**, 157, 878, doi: 10.7326/0003-4819-157-12-201212180-00563.
42. Dang, X.; Xu, M.; Liu, D.; Zhou, D.; Yang, W. Assessing the efficacy and safety of fecal microbiota transplantation and probiotic VSL#3 for active ulcerative colitis: A systematic review and meta-analysis. *PLoS One* **2020**, 15, e228846, doi: 10.1371/journal.pone.0228846.
43. Kaur, L.; Gordon, M.; Baines, P.A.; Iheozor-Ejiofor, Z.; Sinopoulou, V.; Akobeng, A.K. Probiotics for induction of remission in ulcerative colitis. *Cochrane Db. Syst. Rev.* **2020**, 2020, D5573, doi: 10.1002/14651858.CD005573.pub3.
44. Rufino, M.N.; Da Costa, A.L.; Jorge, E.N.; Paiano, V.F.; Camparoto, M.L.; Keller, R.; Bremer-Neto, H. Synbiotics improve clinical indicators of ulcerative colitis: systematic review with meta-analysis. *Nutr. Rev.* **2022**, 80, 157-164, doi: 10.1093/nutrit/nuab017.
45. Peng, L.; Zhong, Y.; Wang, A.; Jiang, Z. Probiotics combined with aminosalicilic acid affiliates remission of ulcerative colitis: a meta-analysis of randomized controlled trial. *Bioscience Rep.* **2019**, 39, doi: 10.1042/BSR20180943.
46. Losurdo, G.; Iannone, A.; Contaldo, A.; Ierardi, E.; Di Leo, A.; Principi, M. *Escherichia coli* Nissle 1917 in Ulcerative Colitis Treatment: Systematic Review and Meta-analysis. *J. Gastrointest. Liver* **2020**, 24, 499-505, doi: 10.15403/jgld.2014.1121.244.ecn.
47. Iheozor-Ejiofor, Z.; Kaur, L.; Gordon, M.; Baines, P.A.; Sinopoulou, V.; Akobeng, A.K. Probiotics for maintenance of remission in ulcerative colitis. *Cochrane Db. Syst. Rev.* **2020**, 3, D7443, doi: 10.1002/14651858.CD007443.pub3.
48. Astó, E.; Méndez, I.; Audivert, S.; Farran-Codina, A.; Espadaler, J. The Efficacy of Probiotics, Prebiotic Inulin-Type Fructans, and Synbiotics in Human Ulcerative Colitis: A Systematic Review and Meta-Analysis. *Nutrients* **2019**, 11, 293, doi: 10.3390/nu11020293.
49. Goodman, C.; Keating, G.; Georgousopoulou, E.; Hespe, C.; Levett, K. Probiotics for the prevention of antibiotic-associated diarrhoea: a systematic review and meta-analysis. *BMJ Open* **2021**, 11, e43054, doi: 10.1136/bmjopen-2020-043054.
50. Guo, Q.; Goldenberg, J.Z.; Humphrey, C.; Dib, R.E.; Johnston, B. PROBIOTICS FOR THE PREVENTION OF PEDIATRIC ANTIBIOTIC-ASSOCIATED DIARRHEA. *Gastroenterology* **2019**, 156, 220, doi: 10.1016/S0016-5085%2819%2937348-2.
51. Jafarnejad, S.; Shab-Bidar, S.; Speakman, J.R.; Parastui, K.; Daneshi-Maskooni, M.; Djafarian, K. Probiotics Reduce the Risk of Antibiotic-Associated Diarrhea in Adults (18–64 Years) but Not the Elderly (>65 Years). *Nutr. Clin. Pract.* **2016**, 31, 502-513, doi: 10.1177/0884533616639399.
52. Blaabjerg, S.; Artzi, D.; Aabenhus, R. Probiotics for the Prevention of Antibiotic-Associated Diarrhea in Outpatients—A Systematic Review and Meta-Analysis. *Antibiotics* **2017**, 6, 21, doi: 10.3390/antibiotics6040021.
53. Zhang, X.; Guan, X.; Tang, Y.; Sun, J.; Wang, X.; Wang, W.; Fan, J. Clinical effects and gut microbiota changes of using probiotics, prebiotics or synbiotics in inflammatory bowel disease: a systematic review and meta-analysis. *Eur. J. Nutr.* **2021**, 60, 2855-2875, doi: 10.1007/s00394-021-02503-5.

54. Derwa, Y.; Gracie, D.J.; Hamlin, P.J.; Ford, A.C. Systematic review with meta-analysis: the efficacy of probiotics in inflammatory bowel disease. *Aliment. Pharm. Ther.* **2017**, *46*, 389-400, doi: 10.1111/apt.14203.
55. Pabón-Carrasco, M.; Ramirez-Baena, L.; Vilar-Palomo, S.; Castro-Méndez, A.; Martos-García, R.; Rodríguez-Gallego, I. Probiotics as a Coadjuvant Factor in Active or Quiescent Inflammatory Bowel Disease of Adults—A Meta-Analytical Study. *Nutrients* **2020**, *12*, 2628, doi: 10.3390/nu12092628.
56. Ford, A.C.; Harris, L.A.; Lacy, B.E.; Quigley, E.M.M.; Moayyedi, P. Systematic review with meta-analysis: the efficacy of prebiotics, probiotics, synbiotics and antibiotics in irritable bowel syndrome. *Aliment. Pharm. Ther.* **2018**, *48*, 1044-1060, doi: 10.1111/apt.15001.
57. Asha, M.Z.; Khalil, S.F.H. Efficacy and Safety of Probiotics, Prebiotics and Synbiotics in the Treatment of Irritable Bowel Syndrome: A systematic review and meta-analysis. *Sultan Qaboos University Medical Journal [SQUMJ]* **2020**, *20*, 13-24, doi: 10.18295/squmj.2020.20.01.003.
58. Xu, H.; Zou, L.; Chen, M.; Wang, H.; Shen, W.; Zheng, Q.; Cui, W. Efficacy of probiotic adjuvant therapy for irritable bowel syndrome in children: A systematic review and meta-analysis. *PLoS One* **2021**, *16*, e255160, doi: 10.1371/journal.pone.0255160.
59. Connell, M.; Shin, A.; James-Stevenson, T.; Xu, H.; Imperiale, T.F.; Herron, J. Systematic review and meta-analysis: Efficacy of patented probiotic, VSL#3, in irritable bowel syndrome. *Neurogastroenterology & Motility* **2018**, *30*, e13427, doi: 10.1111/nmo.13427.
60. Yuan, F.; Ni, H.; Asche, C.V.; Kim, M.; Walayat, S.; Ren, J. Efficacy of *Bifidobacterium infantis* 35624 in patients with irritable bowel syndrome: a meta-analysis. *Curr. Med. Res. Opin.* **2017**, *33*, 1191-1197, doi: 10.1080/03007995.2017.1292230.
61. Wen, Y.; Li, J.; Long, Q.; Yue, C.; He, B.; Tang, X. The efficacy and safety of probiotics for patients with constipation-predominant irritable bowel syndrome: A systematic review and meta-analysis based on seventeen randomized controlled trials. *Int. J. Surg.* **2020**, *79*, 111-119, doi: 10.1016/j.ijssu.2020.04.063.
62. Wu, X.; Xu, W.; Liu, M.; Hu, K.; Sun, Y.; Yang, X.; Zhu, G.; Wang, Z.; Huang, W. Efficacy of prophylactic probiotics in combination with antibiotics versus antibiotics alone for colorectal surgery: A meta-analysis of randomized controlled trials. *J. Surg. Oncol.* **2018**, *117*, 1394-1404, doi: 10.1002/jso.25038.
63. Zhong, C.; Qu, C.; Wang, B.; Liang, S.; Zeng, B. Probiotics for Preventing and Treating Small Intestinal Bacterial Overgrowth. *J. Clin. Gastroenterol.* **2017**, *51*, 300-311, doi: 10.1097/MCG.0000000000000814.
64. Zhang, C.; Jiang, J.; Tian, F.; Zhao, J.; Zhang, H.; Zhai, Q.; Chen, W. Meta-analysis of randomized controlled trials of the effects of probiotics on functional constipation in adults. *Clin. Nutr.* **2020**, *39*, 2960-2969, doi: 10.1016/j.clnu.2020.01.005.
65. Huang, R.; Hu, J. Positive Effect of Probiotics on Constipation in Children: A Systematic Review and Meta-Analysis of Six Randomized Controlled Trials. *Front. Cell. Infect. Mi.* **2017**, *7*, 153, doi: 10.3389/fcimb.2017.00153.
66. Losurdo, G.; Cubisino, R.; Barone, M.; Principi, M.; Leandro, G.; Ierardi, E.; Leo, A.D. Probiotic monotherapy and *Helicobacter pylori* eradication: A systematic review with pooled-data analysis. *World J. Gastroentero.* **2018**, *24*, 139-149, doi: 10.3748/wjg.v24.i1.139.
67. Ji, T.; Zhu, X.; Shang, F.; Zhang, X. Preventive Effect of Probiotics on Ventilator-Associated Pneumonia: A Meta-analysis of 2428 Patients. *Ann. Pharmacother.* **2021**, *55*, 949-962, doi: 10.1177/1060028020983021.
68. Rao, S.; Srinivasjois, R.; Patole, S. Prebiotic Supplementation in Full-term Neonates. *Archives of Pediatrics & Adolescent Medicine* **2009**, *163*, 755-764, doi: 10.1001/archpediatrics.2009.94.
69. Lohner, S.; Küllenberg, D.; Antes, G.; Decsi, T.; Meerpohl, J.J. Prebiotics in healthy infants and children for prevention of acute infectious diseases: a systematic review and meta-analysis. *Nutr. Rev.* **2014**, *72*, 523-531, doi: 10.1111/nure.12117.



70. Wilson, B.; Rossi, M.; Dimidi, E.; Whelan, K. Prebiotics in irritable bowel syndrome and other functional bowel disorders in adults: a systematic review and meta-analysis of randomized controlled trials. *The American Journal of Clinical Nutrition* **2019**, *109*, 1098-1111, doi: 10.1093/ajcn/nqy376.
71. Chi, C.; Buys, N.; Li, C.; Sun, J.; Yin, C. Effects of prebiotics on sepsis, necrotizing enterocolitis, mortality, feeding intolerance, time to full enteral feeding, length of hospital stay, and stool frequency in preterm infants: a meta-analysis. *Eur. J. Clin. Nutr.* **2019**, *73*, 657-670, doi: 10.1038/s41430-018-0377-6.
72. Sohail, G.; Xu, X.; Christman, M.C.; Tompkins, T.A. Probiotic Medilac-S® for the induction of clinical remission in a Chinese population with ulcerative colitis: A systematic review and meta-analysis. *World Journal of Clinical Cases* **2018**, *6*, 961-984, doi: 10.12998/wjcc.v6.i15.961.
73. Nakamura, H.; Lim, T.; Puri, P. Probiotics for the prevention of Hirschsprung-associated enterocolitis: a systematic review and meta-analysis. *Pediatr. Surg. Int.* **2018**, *34*, 189-193, doi: 10.1007/s00383-017-4188-y.
74. Miller, L.E.; Zimmermann, A.K.; Ouwehand, A.C. Contemporary meta-analysis of short-term probiotic consumption on gastrointestinal transit. *World J. Gastroenterol.* **2016**, *22*, 5122, doi: 10.3748/wjg.v22.i21.5122.
75. Seiler, C.L.; Kiflen, M.; Stefanolo, J.P.; Bai, J.C.; Bercik, P.; Kelly, C.P.; Verdu, E.F.; Moayyedi, P.; Pinto-Sanchez, M.I. Probiotics for Celiac Disease: A Systematic Review and Meta-Analysis of Randomized Controlled Trials. *Am. J. Gastroenterol.* **2020**, *115*, 1584-1595, doi: 10.14309/ajg.0000000000000749.
76. Zhang, J.; Wu, H.M.; Wang, X.; Xie, J.; Li, X.; Ma, J.; Wang, F.; Tang, X. Efficacy of prebiotics and probiotics for functional dyspepsia. *Medicine* **2020**, *99*, e19107, doi: 10.1097/MD.00000000000019107.
77. Sorensen, K.; Cawood, A.L.; Gibson, G.R.; Cooke, L.H.; Stratton, R.J. Amino Acid Formula Containing Synbiotics in Infants with Cow's Milk Protein Allergy: A Systematic Review and Meta-Analysis. *Nutrients* **2021**, *13*, 935, doi: 10.3390/nu13030935.
78. Suzumura, E.A.; Bersch-Ferreira, Â.C.; Torreglosa, C.R.; Da Silva, J.T.; Coqueiro, A.Y.; Kuntz, M.G.F.; Chrispim, P.P.; Weber, B.; Cavalcanti, A.B. Effects of oral supplementation with probiotics or synbiotics in overweight and obese adults: a systematic review and meta-analyses of randomized trials. *Nutr. Rev.* **2019**, *77*, 430-450, doi: 10.1093/nutrit/nuz001.
79. Mohammadi, H.; Ghavami, A.; Faghihimani, Z.; Sharifi, S.; Nattagh-Eshtivani, E.; Ziaei, R.; Miraghajani, M. Effects of probiotics fermented milk products on obesity measure among adults: A systematic review and meta-analysis of clinical trials. *J. Funct. Foods* **2021**, *82*, 104494, doi: 10.1016/j.jff.2021.104494.
80. Hadi, A.; Ghaedi, E.; Khalesi, S.; Pourmasoumi, M.; Arab, A. Effects of synbiotic consumption on lipid profile: a systematic review and meta-analysis of randomized controlled clinical trials. *Eur. J. Nutr.* **2020**, *59*, 2857-2874, doi: 10.1007/s00394-020-02248-7.
81. Zhang, G.; Hu, H.; Liu, C.; Zhang, Q.; Shakya, S.; Li, Z. Probiotics for Prevention of Atopy and Food Hypersensitivity in Early Childhood. *Medicine* **2016**, *95*, e2562, doi: 10.1097/MD.0000000000002562.
82. Coffey, M.J.; Garg, M.; Homaira, N.; Jaffe, A.; Ooi, C.Y. Probiotics for people with cystic fibrosis. *Cochrane Db. Syst. Rev.* **2020**, doi: 10.1002/14651858.CD012949.pub2.
83. Miller, L.; Lehtoranta, L.; Lehtinen, M. The Effect of Bifidobacterium animalis ssp. lactis HN019 on Cellular Immune Function in Healthy Elderly Subjects: Systematic Review and Meta-Analysis. *Nutrients* **2017**, *9*, 191, doi: 10.3390/nu9030191.
84. Miller, L.E.; Lehtoranta, L.; Lehtinen, M.J. Short-term probiotic supplementation enhances cellular immune function in healthy elderly: systematic review and meta-analysis of controlled studies. *Nutr. Res.* **2019**, *64*, 1-8, doi: 10.1016/j.nutres.2018.12.011.
85. Dermyshe, E.; Wang, Y.; Yan, C.; Hong, W.; Qiu, G.; Gong, X.; Zhang, T. The "Golden Age" of Probiotics: A Systematic Review and Meta-Analysis of Randomized and Observational Studies in Preterm Infants. *Neonatology* **2017**, *112*, 9-23, doi: 10.1159/000454668.
86. Aceti, A.; Maggio, L.; Beghetti, I.; Gori, D.; Barone, G.; Callegari, M.; Fantini, M.; Indrio, F.; Meneghin, F.; Morelli, L.; et al. Probiotics Prevent Late-Onset Sepsis in Human

Milk-Fed, Very Low Birth Weight Preterm Infants: Systematic Review and Meta-Analysis. *Nutrients* **2017**, *9*, 904, doi: 10.3390/nu9080904.

87. Sawas, T.; Al Halabi, S.; Hernaez, R.; Carey, W.D.; Cho, W.K. Patients Receiving Prebiotics and Probiotics Before Liver Transplantation Develop Fewer Infections Than Controls: A Systematic Review and Meta-Analysis. *Clin. Gastroenterol. H.* **2015**, *13*, 1567-1574, doi: 10.1016/j.cgh.2015.05.027.
88. Yang, Z.; Wu, Q.; Liu, Y.; Fan, D. Effect of Perioperative Probiotics and Synbiotics on Postoperative Infections After Gastrointestinal Surgery: A Systematic Review With Meta-Analysis. *Jpen.-Parenter. Enter.* **2017**, *41*, 1051-1062, doi: 10.1177/0148607116629670.
89. Le Morvan De Sequeira, C.; Kaeber, M.; Cekin, S.E.; Enck, P.; Mack, I. The Effect of Probiotics on Quality of Life, Depression and Anxiety in Patients with Irritable Bowel Syndrome: A Systematic Review and Meta-Analysis. *Journal of Clinical Medicine* **2021**, *10*, 3497, doi: 10.3390/jcm10163497.
90. Lei, W.; Shih, P.; Liu, S.; Lin, C.; Yeh, T. Effect of Probiotics and Prebiotics on Immune Response to Influenza Vaccination in Adults: A Systematic Review and Meta-Analysis of Randomized Controlled Trials. *Nutrients* **2017**, *9*, 1175, doi: 10.3390/nu9111175.
91. Yeh, T.; Shih, P.; Liu, S.; Lin, C.; Liu, J.; Lei, W.; Lin, C. The influence of prebiotic or probiotic supplementation on antibody titers after influenza vaccination: a systematic review and meta-analysis of randomized controlled trials. *Drug Des. Dev. Ther.* **2018**, *Volume 12*, 217-230, doi: 10.2147/DDDT.S155110.
92. Hendijani, F.; Akbari, V. Probiotic supplementation for management of cardiovascular risk factors in adults with type II diabetes: A systematic review and meta-analysis. *Clin. Nutr.* **2018**, *37*, 532-541, doi: 10.1016/j.clnu.2017.02.015.
93. Du, X.; Wang, L.; Wu, S.; Yuan, L.; Tang, S.; Xiang, Y.; Qu, X.; Liu, H.; Qin, X.; Liu, C. Efficacy of probiotic supplementary therapy for asthma, allergic rhinitis, and wheeze: a meta-analysis of randomized controlled trials. *Allergy Asthma Proc.* **2019**, *40*, 250-260, doi: 10.2500/aap.2019.40.4227.
94. Sun, S.; Chang, G.; Zhang, L. The prevention effect of probiotics against eczema in children: an update systematic review and meta-analysis. *J. Dermatol. Treat.* **2021**, 1-11, doi: 10.1080/09546634.2021.1925077.
95. Boyle, R.J.; Bath-Hextall, F.J.; Leonardi-Bee, J.; Murrell, D.F.; Tang, M.L. Probiotics for the treatment of eczema: a systematic review. *Clinical & Experimental Allergy* **2009**, *39*, 1117-1127, doi: 10.1111/j.1365-2222.2009.03305.x.
96. Wang, F.; Pan, B.; Xu, S.; Xu, Z.; Zhang, T.; Zhang, Q.; Bao, Y.; Wang, Y.; Zhang, J.; Xu, C.; et al. A meta-analysis reveals the effectiveness of probiotics and prebiotics against respiratory viral infection. *Bioscience Rep.* **2021**, *41*, R20203638, doi: 10.1042/BSR20203638.
97. Wang, Y.; Li, X.; Ge, T.; Xiao, Y.; Liao, Y.; Cui, Y.; Zhang, Y.; Ho, W.; Yu, G.; Zhang, T. Probiotics for prevention and treatment of respiratory tract infections in children. *Medicine* **2016**, *95*, e4509, doi: 10.1097/MD.0000000000004509.
98. Irwin, C.; McCartney, D.; Ben, D.; Khalesi, S. Effects of probiotics and paraprobiotics on subjective and objective sleep metrics: a systematic review and meta-analysis. *Eur. J. Clin. Nutr.* **2020**, *74*, 1536-1549, doi: 10.1038/s41430-020-0656-x.
99. Jiang, J.; Chu, C.; Wu, C.; Wang, C.; Zhang, C.; Li, T.; Zhai, Q.; Yu, L.; Tian, F.; Chen, W. Efficacy of probiotics in multiple sclerosis: a systematic review of preclinical trials and meta-analysis of randomized controlled trials. *Food Funct.* **2021**, *12*, 2354-2377, doi: 10.1039/D0FO03203D.
100. Stachowska, E.; Portincasa, P.; Jamioł-Milc, D.; Maciejewska-Markiewicz, D.; Skonieczna-zydecka, K. The Relationship between Prebiotic Supplementation and Anthropometric and Biochemical Parameters in Patients with NAFLD—A Systematic Review and Meta-Analysis of Randomized Controlled Trials. *Nutrients* **2020**, *12*, 3460, doi: 10.3390/nu12113460.
101. Sharpton, S.R.; Maraj, B.; Harding-Theobald, E.; Vittinghoff, E.; Terrault, N.A. Gut microbiome-targeted therapies in nonalcoholic fatty liver disease: a systematic review, meta-analysis, and meta-regression. *The American Journal of Clinical Nutrition* **2019**, *110*, 139-149, doi: 10.1093/ajcn/nqz042.

102. Chang, Y.; Trivedi, M.K.; Jha, A.; Lin, Y.; Dimaano, L.; García-Romero, M.T. Synbiotics for Prevention and Treatment of Atopic Dermatitis. *JAMA Pediatr.* **2016**, *170*, 236, doi: 10.1001/jamapediatrics.2015.3943.
103. Kahn, J.; Pregartner, G.; Schemmer, P. Effects of both Pro- and Synbiotics in Liver Surgery and Transplantation with Special Focus on the Gut–Liver Axis—A Systematic Review and Meta-Analysis. *Nutrients* **2020**, *12*, 2461, doi: 10.3390/nu12082461.
104. Chan, C.K.Y.; Tao, J.; Chan, O.S.; Li, H.; Pang, H. Preventing Respiratory Tract Infections by Synbiotic Interventions: A Systematic Review and Meta-Analysis of Randomized Controlled Trials. *Adv. Nutr.* **2020**, *11*, 979–988, doi: 10.1093/advances/nmaa003.
105. Kinross, J.M.; Markar, S.; Karthikesalingam, A.; Chow, A.; Penney, N.; Silk, D.; Darzi, A. A Meta-Analysis of Probiotic and Synbiotic Use in Elective Surgery. *Jpen.-Parenter. Enter.* **2013**, *37*, 243–253, doi: 10.1177/0148607112452306.
106. Sharif, S.; Meader, N.; Oddie, S.J.; Rojas-Reyes, M.X.; Mcguire, W. Probiotics to prevent necrotising enterocolitis in very preterm or very low birth weight infants. *Cochrane Db. Syst. Rev.* **2020**, *2020*, D5496, doi: 10.1002/14651858.CD005496.pub5.
107. Yang, Y.; Guo, Y.; Kan, Q.; Zhou, X.G.; Zhou, X.Y.; Li, Y. A meta-analysis of probiotics for preventing necrotizing enterocolitis in preterm neonates. *Braz. J. Med. Biol. Res.* **2014**, *47*, 804–810, doi: 10.1590/1414-431X20143857.
108. Jiang, T.; Zhang, H.; Xu, X.; Li, H.; Yang, J. Mixed probiotics decrease the incidence of stage II–III necrotizing enterocolitis and death: A systematic review and meta-analysis. *Microb. Pathogenesis* **2020**, *138*, 103794, doi: 10.1016/j.micpath.2019.103794.
109. Liu, D.; Shao, L.; Zhang, Y.; Kang, W. Safety and efficacy of Lactobacillus for preventing necrotizing enterocolitis in preterm infants. *Int. J. Surg.* **2020**, *76*, 79–87, doi: 10.1016/j.ijssu.2020.02.031.
110. Zhu, X.; Tang, X.; Qu, F.; Zheng, Y.; Zhang, W.; Diao, Y. Bifidobacterium may benefit the prevention of necrotizing enterocolitis in preterm infants: A systematic review and meta-analysis. *Int. J. Surg.* **2019**, *61*, 17–25, doi: 10.1016/j.ijssu.2018.11.026.
111. Lv, T.; Ye, M.; Luo, F.; Hu, B.; Wang, A.; Chen, J.; Yan, J.; He, Z.; Chen, F.; Qian, C.; et al. Probiotics treatment improves cognitive impairment in patients and animals: A systematic review and meta-analysis. *Neuroscience & Biobehavioral Reviews* **2021**, *120*, 159–172, doi: 10.1016/j.neubiorev.2020.10.027.
112. Krüger, J.F.; Hillesheim, E.; Pereira, A.C.S.N.; Camargo, C.Q.; Rabito, E.I. Probiotics for dementia: a systematic review and meta-analysis of randomized controlled trials. *Nutr. Rev.* **2021**, *79*, 160–170, doi: 10.1093/nutrit/nuaa037.
113. Liu, B.; He, Y.; Wang, M.; Liu, J.; Ju, Y.; Zhang, Y.; Liu, T.; Li, L.; Li, Q. Efficacy of probiotics on anxiety-A meta-analysis of randomized controlled trials. *Depress. Anxiety* **2018**, *35*, 935–945, doi: 10.1002/da.22811.
114. Mckean, J.; Naug, H.; Nikbakht, E.; Amiet, B.; Colson, N. Probiotics and Subclinical Psychological Symptoms in Healthy Participants: A Systematic Review and Meta-Analysis. *The Journal of Alternative and Complementary Medicine* **2017**, *23*, 249–258, doi: 10.1089/acm.2016.0023.
115. Goh, K.K.; Liu, Y.; Kuo, P.; Chung, Y.E.; Lu, M.; Chen, C. Effect of probiotics on depressive symptoms: A meta-analysis of human studies. *Psychiat. Res.* **2019**, *282*, 112568, doi: 10.1016/j.psychres.2019.112568.
116. Ng, Q.X.; Soh, A.Y.S.; Venkatanarayanan, N.; Ho, C.Y.X.; Lim, D.Y.; Yeo, W. A Systematic Review of the Effect of Probiotic Supplementation on Schizophrenia Symptoms. *Neuropsychobiology* **2019**, *78*, 1–6, doi: 10.1159/000498862.
117. Zhang, N.; Zhang, Y.; Li, M.; Wang, W.; Liu, Z.; Xi, C.; Huang, X.; Liu, J.; Huang, J.; Tian, D.; et al. Efficacy of probiotics on stress in healthy volunteers: A systematic review and meta-analysis based on randomized controlled trials. *Brain and Behavior* **2020**, *10*, doi: 10.1002/brb3.1699.

118. Cohen Kadosh, K.; Basso, M.; Knytl, P.; Johnstone, N.; Lau, J.Y.F.; Gibson, G.R. Psychobiotic interventions for anxiety in young people: a systematic review and meta-analysis, with youth consultation. *Transl. Psychiat.* **2021**, *11*, doi: 10.1038/s41398-021-01422-7.
119. Liu, R.T.; Walsh, R.F.L.; Sheehan, A.E. Prebiotics and probiotics for depression and anxiety: A systematic review and meta-analysis of controlled clinical trials. *Neuroscience & Biobehavioral Reviews* **2019**, *102*, 13-23, doi: 10.1016/j.neubiorev.2019.03.023.
120. Ong, T.G.; Gordon, M.; Banks, S.S.; Thomas, M.R.; Akobeng, A.K. Probiotics to prevent infantile colic. *Cochrane Db. Syst. Rev.* **2019**, doi: 10.1002/14651858.CD012473.pub2.
121. Skonieczna-żydecka, K.; Janda, K.; Kaczmarczyk, M.; Marlicz, W.; łoniewski, I.; łoniewska, B. The Effect of Probiotics on Symptoms, Gut Microbiota and Inflammatory Markers in Infantile Colic: A Systematic Review, Meta-Analysis and Meta-Regression of Randomized Controlled Trials. *Journal of Clinical Medicine* **2020**, *9*, 999, doi: 10.3390/jcm9040999.
122. Upadhyay, R.P.; Taneja, S.; Chowdhury, R.; Strand, T.A.; Bhandari, N. Effect of prebiotic and probiotic supplementation on neurodevelopment in preterm very low birth weight infants: findings from a meta-analysis. *Pediatr. Res.* **2020**, *87*, 811-822, doi: 10.1038/s41390-018-0211-9.
123. Sung, V.; Collett, S.; de Gooyer, T.; Hiscock, H.; Tang, M.; Wake, M. Probiotics to Prevent or Treat Excessive Infant Crying. *JAMA Pediatr.* **2013**, *167*, 1150, doi: 10.1001/jamapediatrics.2013.2572.
124. Grev, J.; Berg, M.; Soll, R. Maternal probiotic supplementation for prevention of morbidity and mortality in preterm infants. *Cochrane Db. Syst. Rev.* **2018**, *2018*, D12519, doi: 10.1002/14651858.CD012519.pub2.
125. Wang, C.; Tung, Y.; Chang, H.; Lin, C.; Chen, Y. Effect of Probiotic Supplementation on Newborn Birth Weight for Mother with Gestational Diabetes Mellitus or Overweight/Obesity: A Systematic Review and Meta-Analysis. *Nutrients* **2020**, *12*, 3477, doi: 10.3390/nu12113477.
126. Han, M.; Sun, J.; Su, X.; Peng, Y.; Goyal, H.; Wu, C.; Zhu, X.; Li, L. Probiotics improve glucose and lipid metabolism in pregnant women: a meta-analysis. *Annals of Translational Medicine* **2019**, *7*, 99, doi: 10.21037/atm.2019.01.61.
127. Davidson, S.J.; Barrett, H.L.; Price, S.A.; Callaway, L.K.; Dekker Nitert, M. Probiotics for preventing gestational diabetes. *Cochrane Db. Syst. Rev.* **2021**, *2021*, D9951, doi: 10.1002/14651858.CD009951.pub3.
128. Hasain, Z.; Che Roos, N.A.; Rahmat, F.; Mustapa, M.; Raja Ali, R.A.; Mokhtar, N.M. Diet and Pre-Intervention Washout Modifies the Effects of Probiotics on Gestational Diabetes Mellitus: A Comprehensive Systematic Review and Meta-Analysis of Randomized Controlled Trials. *Nutrients* **2021**, *13*, 3045, doi: 10.3390/nu13093045.
129. Sun, M.; Luo, J.; Liu, H.; Xi, Y.; Lin, Q. Can Mixed Strains of Lactobacillus and Bifidobacterium Reduce Eczema in Infants under Three Years of Age? A Meta-Analysis. *Nutrients* **2021**, *13*, 1461, doi: 10.3390/nu13051461.
130. Szajewska, H.; Horvath, A. Lactobacillus rhamnosus GG in the Primary Prevention of Eczema in Children: A Systematic Review and Meta-Analysis. *Nutrients* **2018**, *10*, 1319, doi: 10.3390/nu10091319.
