# Supplementary material for: Gastrointestinal Microbiome and Multiple Health Outcomes: Umbrella Review
Source: MDPI journal article supplement (doi:10.3390/nu14183726), 2022-09-09
Supplement: s1 [file s1]

**Supplement Table S11.** Association between disease and changes in gastrointestinal microbiota and its metabolites.

| outcome(s) of interest (cancer outcomes and non-cancer outcomes)      | estimated summary effect (95% CI) | number of studies/total studies | number of envets or total participants | Heterogeneity ( <i>I<sup>2</sup></i> , %) | the author + year of publication | first year | Intervention | Duration of Intervention/follow-up | study design (cohort, case-control, randomized controlled trial [RCTs]) | populations                                                                             | outcome comparison (e.g., highest versus lowest/none, any versus none or dose-response) | meta-analysis metric(OR, odds ratio; RR, relative risk; HR, hazard ratio; MD, mean difference) | type of effect model (fixed or random) | publication bias (Egger test P value or Funnel plot) |
|-----------------------------------------------------------------------|-----------------------------------|---------------------------------|----------------------------------------|-------------------------------------------|----------------------------------|------------|--------------|------------------------------------|-------------------------------------------------------------------------|-----------------------------------------------------------------------------------------|-----------------------------------------------------------------------------------------|------------------------------------------------------------------------------------------------|----------------------------------------|------------------------------------------------------|
| small intestinal bacterial overgrowth (SIBO)                          | 36% ( 17% to 60%)                 | 9                               | NP                                     | 91.0                                      | CAPURSO 2016[1]                  | G          | -            | NP                                 | cross-sectional or case-control design                                  | patients with a presumed diagnosis of Chronic pancreatitis (CP), age > 18 years         | -                                                                                       | Event rate                                                                                     | random                                 | 0.6                                                  |
|                                                                       | 4.1 (1.6 to 10.4)                 | 7                               | 513                                    | 59.7                                      |                                  |            |              |                                    |                                                                         | Vs. control                                                                             | OR                                                                                      | random                                                                                         | 0.2                                    |                                                      |
| prevalence of small intestinal bacterial overgrowth (SIBO)            | 7.15 ( 4.91 to 10.41)             | 21                              | NP                                     | 0.0                                       | SHAH 2017[2]                     | A          | -            | NP                                 | case-control studies                                                    | patients with liver disease (CLD)                                                       | Vs. control                                                                             | OR                                                                                             | random                                 | NP                                                   |
| prevalence of small intestinal bacterial overgrowth (SIBO)            | 6.83 (4.16 to 11.21)              | 21                              | 1570                                   | 0.0                                       | MASLENNIKOV R 2018[3]            |            | -            | NP                                 | clinical trials                                                         | age ≥ 18 years; patients with diagnosis of cirrhosis                                    | Vs. control                                                                             | OR                                                                                             | random                                 | 0.158                                                |
| Prevalence of ascites                                                 | 2.72 (1.65 to 4.50)               | 5                               | NP                                     | 0.0                                       |                                  |            |              |                                    |                                                                         | age ≥ 18 years; patients with diagnosis of cirrhosis with SIBO                          | age ≥ 18 years; patients with diagnosis of cirrhosis vs. No SIBO                        |                                                                                                |                                        | NP                                                   |
| minimal hepatic encephalopathy                                        | 6.28 (2.10 to 18.80)              | 3                               | NP                                     | 61.6                                      |                                  |            |              |                                    |                                                                         |                                                                                         |                                                                                         |                                                                                                |                                        |                                                      |
| spontaneous bacterial peritonitis                                     | 3.28 (1.36 to 7.90)               | 7                               | NP                                     | 45.7                                      |                                  |            |              |                                    |                                                                         |                                                                                         |                                                                                         |                                                                                                |                                        |                                                      |
| Nonalcoholic fatty liver disease (NAFLD)                              | 3.82 (1.93 to 7.59)               | 10                              | NP                                     | 65.0                                      | WIJARNPREECHA K 2020 [4]         | PREE       | -            | NP                                 | cross-sectional studies, case-control studies and cohort studies        | patients with small intestinal bacterial overgrowth (SIBO)                              | with SIBO vs. No SIBO                                                                   | OR                                                                                             | random                                 | No serious bias                                      |
| Prevalence of a positive lactulose hydrogen breath test (LHBT) in IBS | 1.3 (0.8 to 1.9)*                 | 9                               | 1104                                   | 75.0                                      | GHOSHAL C 2020[5]                | U          | -            | NP                                 | case series, case-control studies                                       | consecutive adult (>18 years) subjects meeting diagnostic criteria for IBS (physicians' | With IBS vs. control                                                                    | RR                                                                                             | random                                 | No serious bias                                      |
| Prevalence of a                                                       | 4.23 (3.02 to 5.95)               | 9                               | 2193                                   | 0.0                                       |                                  |            |              |                                    |                                                                         |                                                                                         |                                                                                         |                                                                                                |                                        |                                                      |

|                                                                  |          |                       |    |      |      |                                                                  |   |   |    |                                                                             |                                                                                                                                                                                                                                                 |                                                |    |            |                                             |
|------------------------------------------------------------------|----------|-----------------------|----|------|------|------------------------------------------------------------------|---|---|----|-----------------------------------------------------------------------------|-------------------------------------------------------------------------------------------------------------------------------------------------------------------------------------------------------------------------------------------------|------------------------------------------------|----|------------|---------------------------------------------|
| positive glucose<br>hydrogen breath test<br>(GHBT) in IBS        |          |                       |    |      |      | diagnosis, using<br>Manning2 or<br>Rome criteria)                |   |   |    |                                                                             |                                                                                                                                                                                                                                                 |                                                |    |            |                                             |
| Prevalence of SIBO<br>on upper gut<br>aspirate culture in<br>IBS |          | 3.01 (1.31 to 6.90)   | 5  | 508  | 0.0  |                                                                  |   |   |    |                                                                             |                                                                                                                                                                                                                                                 |                                                |    |            |                                             |
| Prevalence of SIBO                                               |          | 1.40 (0.96 to 2.02)*  | 6  | 609  | 30.2 | Patients with<br>diarrhea-predomi<br>nant IBS                    |   |   |    |                                                                             |                                                                                                                                                                                                                                                 |                                                |    |            |                                             |
| Prevalence of SIBO                                               |          | 4.7 (3.1 to 7.2)      | 23 | 4407 | 74.0 | CHEN<br>2018[6]                                                  | B | - | NP | Case-control<br>or<br>case-series<br>studies                                | subjects meeting<br>diagnostic criteria<br>for Irritable bowel<br>syndrome (IBS),<br>including a<br>physician's<br>diagnosis,<br>questionnaire<br>data, or specific<br>symptom-based<br>criteria such as<br>the Manning or<br><br>Rome criteria | vs. healthy<br>controls                        | OR | Rando<br>m | No<br>serious<br>bias                       |
| methane                                                          | positive | 1.1 (0.8 to 1.5)*     | 9  | NP   | 3.3  | GANDHI<br>2021[7]                                                | A | - | NP | Case-control<br>or<br>prevalence<br>studies                                 | patients with IBS<br>(and their<br>subtypes)                                                                                                                                                                                                    | vs. healthy<br>controls                        | OR | rando<br>m | NP                                          |
| methane                                                          | positive | 0.5 (0.2 to 1.3)*     | 6  | 1055 | 70.8 | patients with IBD<br>(and their<br>subtypes)                     |   |   |    |                                                                             |                                                                                                                                                                                                                                                 |                                                |    |            |                                             |
| Prevalence of SIBO                                               |          | 12.51 (6.51 to 24.03) | 5  | 475  | 0.0  | FENG<br>2021[8]                                                  | X | - | NP | cohort study<br>or<br>case-control<br>study or<br>cross-section<br>al study | age > 18 years,<br>subjects meeting<br>the diagnostic<br>criteria for<br>systemic sclerosis<br>(SSc) (such as<br>ACR 1980 or<br>ACR-<br>EULAR 2013)                                                                                             | vs. healthy<br>controls                        | OR | fixed      | NA                                          |
| diarrhea                                                         |          | 8.82 (4.09 to 19.00)  | 6  | 249  | 9.0  | the SSc<br>patients with<br>SIBO vs.<br>those<br>without<br>SIBO |   |   |    |                                                                             |                                                                                                                                                                                                                                                 |                                                |    |            |                                             |
| Prevalence of SIBO                                               |          | 2.08 (0.82 to 5.31)*  | 5  | 1187 | 84.0 | WIJARNPREE<br>CHA K 2020[9]                                      | - |   | NP | cohort<br>studies or<br>cross-section<br>al studies                         | participants with<br>vs. without<br>Obesity<br>(overweight<br>23-27.5 kg/m2 and<br>obesity above 27.5                                                                                                                                           | participants<br>with vs.<br>without<br>Obesity | OR | rando<br>m | The<br>funnel<br>plot was<br>asymmetr<br>ic |

| kg/m2 )                                                                                          |                                                      |    |       |      |                       |     |    |                                                                                                    |                                                                   |                                                                                                  |     |        |       |       |  |
|--------------------------------------------------------------------------------------------------|------------------------------------------------------|----|-------|------|-----------------------|-----|----|----------------------------------------------------------------------------------------------------|-------------------------------------------------------------------|--------------------------------------------------------------------------------------------------|-----|--------|-------|-------|--|
| Prevalence of SIBO                                                                               | 5.22 (3.33 to 8.19)                                  | 4  | 559   | 0.0  | LI X 2021[10]         | Q - | NP | studies that had a cross-sectional, cohort or case-control design                                  | subjects who met the Parkinson's disease (PD) diagnostic criteria | vs. healthy controls                                                                             | OR  | fixed  | NP    |       |  |
| prevalence of bloating in PD patients                                                            | 1.67 (0.65 to 4.27)*                                 | 5  | 401   | 72.0 |                       |     |    |                                                                                                    |                                                                   | patients with vs. without SIBO                                                                   |     |        |       |       |  |
| disease duration                                                                                 | -0.25 (-3.64 to 3.14)*                               | 3  | 186   | 91.0 |                       |     |    |                                                                                                    |                                                                   |                                                                                                  |     |        |       |       |  |
| prevalence of constipation                                                                       | 0.38 (0.08 to 1.78)*                                 | 4  | 368   | 85.0 |                       |     |    |                                                                                                    |                                                                   |                                                                                                  |     |        |       |       |  |
| diarrhoea                                                                                        | 1.06 (0.58 to 1.91)*                                 | 4  | 368   | 0.0  |                       |     |    |                                                                                                    |                                                                   |                                                                                                  |     |        |       |       |  |
| circulating trimethylamine N-oxide (TMAO) concentrations                                         | 67.9 (52.7 to 83.2)μmol/L                            | 6  | 770   | 93.0 | ZENG 2021[11]         | Y - | NP | observational studies with cohort, cross-sectional, or case-control designs                        | patients with advanced CKD aged >18 years                         | versus healthy subjects                                                                          | MD  | random | NP    |       |  |
| GFR                                                                                              | -12.9 (-16.6 to -9.14) mL/(min 1.73 m <sup>2</sup> ) | 16 | 28260 | 98.0 |                       |     |    |                                                                                                    |                                                                   | subjects with high concentrations of TMAO compared with subjects with low concentrations of TMAO |     |        |       | 0.390 |  |
| stroke                                                                                           | 1.68 (0.87 to 3.24)*                                 | 5  | 4910  | 84.9 | FARHANGI M A 2020[12] | -   | NP | observational (case-control, analytic cross-sectional, nested case-control, case-cohort or cohort) | Human                                                             | highest versus the lowest category of trimethylamine N-oxide (TMAO) concentrations               | OR  | random | 0.197 |       |  |
| the circulating levels of trimethylamine N-oxide (TMAO)                                          | 2.20 (1.21 to 3.18)μmol/L                            | 4  | 2484  | 99.7 |                       |     |    |                                                                                                    |                                                                   | stroke versus non-stroke patients                                                                | WMD |        |       | 0.170 |  |
| The relationship between TMAO plasma levels and incidence of major adverse cardiac events (MACE) | 1.87 ( 1.41 to 2.47)                                 | 7  | NP    | 56.5 | YAO M 2020[13]        | E - | NP | Prospective, observational studies                                                                 | Patient with acute coronary syndrome (ACS)                        | high concentrations of TMAO in comparison with low concentration                                 | HR  | random | NP    |       |  |

|                                                                                     |                        |    |       |      |                            |     |                    |                                                                                                           |                                                     |                  |                                                                         |                    |        |                 |
|-------------------------------------------------------------------------------------|------------------------|----|-------|------|----------------------------|-----|--------------------|-----------------------------------------------------------------------------------------------------------|-----------------------------------------------------|------------------|-------------------------------------------------------------------------|--------------------|--------|-----------------|
| ns                                                                                  |                        |    |       |      |                            |     |                    |                                                                                                           |                                                     |                  |                                                                         |                    |        |                 |
| the association between baseline TMAO and cardiovascular events (CVEs) risk         | 1.23 (1.07 to 1.42)    | 5  | 8139  | 31.4 | QI J Q 2018[14]            | -   | NP                 | prospective cohort study                                                                                  | human                                               |                  | baseline TMAO (highest versus lowest category)                          | hazard ratios (HR) | random | No serious bias |
| all-cause mortality                                                                 | 1.79 (1.23 to 2.60)    | 10 | 13195 | 94.0 | SCHIATTARELLA G G 2017[15] | -   | NP                 | -                                                                                                         | non kidney (CKD)                                    | chronic disease  | patients with high TMAO plasma levels vs. patients with low TMAO levels | hazard ratios (HR) | random | NP              |
|                                                                                     | 2.27 (1.13 to 4.58)    | 5  | 2467  | 91.0 |                            |     |                    |                                                                                                           | chronic disease (CKD)                               | kidney           |                                                                         |                    |        |                 |
| the incidence of major adverse cardio and cerebrovascular events (MACCE)            | 1.67 (1.33 to 2.11)    | 5  | 13944 | 46.0 |                            |     |                    |                                                                                                           | -                                                   |                  |                                                                         |                    |        |                 |
| mortality risk                                                                      | 1.466 (1.291 to 1.665) | 20 | 31230 | 81.9 | FARHANGI M A 2020[16]      | -   | NP                 | prospective cohort, nested case-control, case cohort, case-control, or analytical cross-sectional studies | participants >18 y of age                           |                  | highest versus lowest TMAO categories                                   | hazard ratios (HR) | random | 0.002           |
| major adverse cardiovascular events (MACE)                                          | 1.62 (1.43 to 1.85)    | 19 | 19256 | 23.5 | HEIANZA Y 2017[17]         | -   | 1-6 years          | observational studies                                                                                     | human                                               |                  | highest versus lowest TMAO categories                                   | RR                 | random | > 0.1           |
| Associations of elevated L-carnitine or choline concentrations and the risk of MACE | 1.26 (1.10 to 1.44)    | 6  | NP    | 0.0  |                            |     |                    |                                                                                                           |                                                     |                  |                                                                         |                    |        |                 |
| the association of elevated betaine concentrations with the risk of MACE            | 1.43 (1.19 to 1.73)    | 6  | NP    | 6.4  |                            |     |                    |                                                                                                           |                                                     |                  |                                                                         |                    |        |                 |
| absolute risk of MACE                                                               | 2.05 (1.61 to 2.61)    | 3  | 3089  | 50.0 | GUASTI 2021[18]            | L - | 1 month to 3 years | cohort                                                                                                    | adult defined at high/very high cardiovascular risk | patients at high | patients with a high baseline TMAO value vs. patients with a low        | RR                 | random | NP              |
| The absolute risk of                                                                | 3.42 (2.27 to 5.15)    | 3  | 1801  | 0.0  |                            |     | 6 months           |                                                                                                           |                                                     |                  |                                                                         |                    | fixed  |                 |

|                                      |       |                          |    |       |      |                           |   |            |                                                                                                                                          |                                            |                                                                                                                                                               |     |        |                 |
|--------------------------------------|-------|--------------------------|----|-------|------|---------------------------|---|------------|------------------------------------------------------------------------------------------------------------------------------------------|--------------------------------------------|---------------------------------------------------------------------------------------------------------------------------------------------------------------|-----|--------|-----------------|
| all-cause mortality                  |       |                          |    |       |      |                           |   | to 7 years |                                                                                                                                          |                                            | baseline TMAO value                                                                                                                                           |     |        |                 |
| systolic blood pressure              | blood | 2.16 (1.11 to 3.21) mmHg | 9  | 15097 | 52.2 | ABBASALIZA D F M 2021[19] | - | NP         | Observational studies                                                                                                                    | participants were 18 years of age or older | the highest vs the lowest categories of TMAO concentrations                                                                                                   | WMD | random | 0.006           |
| diastolic blood pressure             | blood | 0.44 (-0.93 to 1.81)*    | 7  | 8811  | 84.1 |                           |   |            |                                                                                                                                          |                                            |                                                                                                                                                               |     |        | No serious bias |
| high-density lipoprotein cholesterol |       | -0.55 (-1.78 to 0.69)*   | 13 | NP    | 94.0 |                           |   |            |                                                                                                                                          |                                            |                                                                                                                                                               |     |        |                 |
| low-density lipoprotein cholesterol  |       | -0.52 (-2.34 to 1.29)*   | 13 | NP    | 68.5 |                           |   |            |                                                                                                                                          |                                            |                                                                                                                                                               |     |        |                 |
| triglycerides                        |       | 1.16 (-0.45 to 2.77)*    | 12 | NP    | 57.6 |                           |   |            |                                                                                                                                          |                                            |                                                                                                                                                               |     |        |                 |
| total cholesterol                    |       | 0.44 (-3.05 to 3.92)*    | 9  | NP    | 84.3 |                           |   |            |                                                                                                                                          |                                            |                                                                                                                                                               |     |        |                 |
| hypertension prevalence              |       | 1.12 (1.06 to 1.17)      | 8  | 11750 | 64.0 | GE X 2019[20]             | - | NP         | Studies recording or analyzing the proportion of hypertensive patients in a certain population and their circulating TMAO concentrations |                                            | individuals with high TMAO concentrations (above the median TMAO concentration) vs. those with low TMAO concentrations (below the median TMAO concentration). | RR  | random | NP              |
| The prevalence of diabetes           |       | 1.89 (1.63 to 2.19)      | 9  | 12961 | 50.2 | ZHUANG R 2019[21]         | - | NP         | cohort studies, case-control studies, cross-sectional studies                                                                            | -                                          | the high-level TMAO group vs. the low-level TMAO group                                                                                                        | OR  | random | 0.275           |
| TMAO levels                          |       | 0.36 (0.30 to 0.42)      | 5  | 5330  | 0.0  |                           |   |            |                                                                                                                                          |                                            | DM vs. non-DM populations                                                                                                                                     | SMD | fixed  | 0.205           |
| association between TMAO level and   |       | 1.68 (1.44 to 1.96)      | 7  | 6879  | 0.0  | LI W 2020[22]             | - | NP         | prospective                                                                                                                              | adults with heart failure(18 or more       | the highest vs. lowest                                                                                                                                        | HR  | random | No serious      |

|                                                                                       |                        |    |     |      |             |   |    |                                                                                                                                                 |                                                                                       |                                                    |               |        |                                |
|---------------------------------------------------------------------------------------|------------------------|----|-----|------|-------------|---|----|-------------------------------------------------------------------------------------------------------------------------------------------------|---------------------------------------------------------------------------------------|----------------------------------------------------|---------------|--------|--------------------------------|
| MACEs in patients with heart failure                                                  |                        |    |     |      |             |   |    |                                                                                                                                                 | studies                                                                               | years old)                                         | TMAO tertiles | m      | bias                           |
| association between TMAO level and all-cause mortality in patients with heart failure | 1.67 (1.17 to 2.38)    | 5  | NP  | 64.0 |             |   |    |                                                                                                                                                 |                                                                                       |                                                    |               |        |                                |
| BMI                                                                                   | 0.56 (0.03 to 1.10)*   | 12 | NP  | 96.8 | DEHGHAN P   | - | NP | observational studies with cohort, case-control, nested case-control, or analytic cross-sectional studies                                       | -                                                                                     | highest versus lowest categories of TMAO           | WMD           | random | No serious bias                |
| CRP concentrations                                                                    | 0.142 (0.094 to 0.190) | 9  | NP  | 84.1 | FARHANGI M  | - | NP | observational studies with the design of prospective cohort, nested case-control, case-cohort, case-control or analytic cross-sectional studies | excluded the studies that were performed among children, pregnant or lactating women, | highest versus lowest TMAO categories              | SMD           | random | 0.696                          |
| rate of H. pylori infection                                                           | 0.64 (0.54 to 0.75)    | 24 | NP  | 75.8 | LUTHER J    | - | NP | -                                                                                                                                               | human                                                                                 | H. pylori in IBD patients vs. controls             | RR            | random | The funnel plot was asymmetric |
| the risk of Nonalcoholic fatty liver disease (NAFLD)                                  | 1.529 (1.336 to 1.750) | 21 | NP  | 95.6 | LIU R Q     | - | NP | -                                                                                                                                               | human                                                                                 | patients with H pylori infection and those without | OR            | random | 0.370                          |
| Anti-H. pylori IgG serum antibody                                                     | 42.45 (9.66 to 186.56) | 3  | 105 | 0.0  | DARDIOTIS E | - | NP | case-control studies                                                                                                                            | human                                                                                 | Guillain-Barré Syndrome (GBS) patients vs. control | OR            | fixed  | No serious bias                |
| likelihood of H.                                                                      | 1.47 (0.90 to 2.40)*   | 9  | NP  | 87.4 | NG Q X      | - | NP | case-control or                                                                                                                                 | patients with IBS                                                                     | patients with IBS vs.                              | OR            | Random | 0.189                          |

| pylori infection                                  |                        |    |      |      | 2019[28]          |   |   |    | cross-sectional study                                                |                                                                          | Without IBS                                           |                                                                       | m      |                 |    |
|---------------------------------------------------|------------------------|----|------|------|-------------------|---|---|----|----------------------------------------------------------------------|--------------------------------------------------------------------------|-------------------------------------------------------|-----------------------------------------------------------------------|--------|-----------------|----|
| the bacterial count of F. prausnitzii             | -0.94 (-1.07 to -0.80) | 12 | 1278 | 96.0 | CAO 2014[29]      | Y | - | NP | -                                                                    | patients with IBD                                                        | IBD patients vs. healthy controls                     | SMD                                                                   | fixed  | No serious bias |    |
| Clostridium coccoides                             | -0.49 (-0.79 to -0.19) | 4  | NP   | 0.0  | Prosberg 2016[30] | M | - | NP | prospective and retrospective Studies (Cohort, case-control studies) | adults with IBD diagnosed with CD or UC based on endoscopy and histology | patients with active IBD compared to IBD in remission | MD                                                                    | random | No serious bias |    |
| Clostridium leptum                                | -0.44 (-0.74 to -0.14) | 4  |      | 0.0  |                   |   |   |    |                                                                      |                                                                          |                                                       |                                                                       |        |                 |    |
| Escherichia coli                                  | 0.43 (-0.04 to 0.91)*  | 3  |      | 26.0 |                   |   |   |    |                                                                      |                                                                          |                                                       |                                                                       |        |                 |    |
| Faecalibacterium prausnitzii                      | -0.81 (-1.23 to -0.39) | 6  |      | 62.0 |                   |   |   |    |                                                                      |                                                                          |                                                       |                                                                       |        |                 |    |
| Bifidobacterium                                   | -0.37 (-0.56 to -0.17) | 7  |      | 0.0  |                   |   |   |    |                                                                      |                                                                          |                                                       |                                                                       |        |                 |    |
| Lactobacillus                                     | -0.07 (-0.36 to 0.22)* | 4  |      | 0.0  |                   |   |   |    |                                                                      |                                                                          |                                                       |                                                                       |        |                 |    |
| acetate                                           | -0.51 (-0.90 to -0.13) | 9  | 596  | 73.0 | ZHUANG 2019[31]   | X | - | NP | -                                                                    | IBD patients with or without medication                                  | patients with UC. vs. healthy controls                | SMD                                                                   | random | No serious bias |    |
| propionate                                        | -0.31 (-0.65 to 0.02)* | 8  | 581  | 65.0 |                   |   |   |    |                                                                      |                                                                          |                                                       |                                                                       |        |                 |    |
| butyrate                                          | -0.27 (-0.76 to 0.22)* | 9  | 602  | 84.0 |                   |   |   |    |                                                                      |                                                                          |                                                       |                                                                       |        |                 |    |
| valerate                                          | -0.65 (-1.02 to -0.28) | 5  | 240  | 41.0 |                   |   |   |    |                                                                      |                                                                          |                                                       |                                                                       |        |                 |    |
| total SCFAs                                       | -0.51 (-0.95 to -0.07) | 6  | 454  | 74.0 |                   |   |   |    |                                                                      |                                                                          |                                                       |                                                                       |        |                 |    |
| acetate                                           | -1.43 (-2.81 to -0.04) | 5  | 216  | 94.0 |                   |   |   |    |                                                                      |                                                                          |                                                       |                                                                       |        |                 |    |
| propionate                                        | -0.23 (-0.79 to 0.32)* | 5  | 216  | 68.0 |                   |   |   |    |                                                                      |                                                                          |                                                       |                                                                       |        |                 |    |
| butyrate                                          | -0.77 (-1.39 to -0.14) | 4  | 282  | 67.0 |                   |   |   |    |                                                                      |                                                                          |                                                       |                                                                       |        |                 |    |
| valerate                                          | -0.75 (-1.47 to -0.02) | 4  | 194  | 77.0 |                   |   |   |    |                                                                      |                                                                          |                                                       |                                                                       |        |                 |    |
| total SCFAs                                       | -1.37 (-3.75 to 1.02)* | 3  | 168  | 97.0 |                   |   |   |    |                                                                      |                                                                          |                                                       |                                                                       |        |                 |    |
| circulating levels of zonulin                     | 0.97 (0.10 to 1.85)    | 4  | 198  | 86.6 | SAFADI 2021[32]   | J | M | -  | NP                                                                   | Case-control studies                                                     | -                                                     | patients with CFS and MDD vs. controls                                | SMD    | random          | NP |
| levels of antibodies against bacterial endotoxins | 0.99 (0.27 to 1.70)    | 7  | 1707 | 97.1 |                   |   |   |    |                                                                      |                                                                          |                                                       | patient with BPD, CFS, major depressive disorder (MDD), schizophrenia |        |                 |    |

[illegible]



|                                     |                        |    |      |      |                       |   |   |    |                                   |                                                                               |                                                                                   |     |        |       |
|-------------------------------------|------------------------|----|------|------|-----------------------|---|---|----|-----------------------------------|-------------------------------------------------------------------------------|-----------------------------------------------------------------------------------|-----|--------|-------|
| iso-butyrate in the feces           | 0.01 (-0.28 to 0.29)*  | 4  |      | 18.5 |                       |   |   |    |                                   |                                                                               |                                                                                   |     |        | 0.380 |
| iso-valerate in the feces           | -0.20 (-0.46 to 0.06)* | 5  |      | 0.0  |                       |   |   |    |                                   |                                                                               |                                                                                   |     |        | 0.783 |
| Bacteroidetes                       | -0.36 (-0.73 to 0.01)* | 4  |      | 72.1 |                       |   |   |    |                                   |                                                                               |                                                                                   |     |        | 0.833 |
| Firmicutes                          | -0.10 (-0.31 to 0.10)* | 4  |      | 58.7 |                       |   |   |    |                                   |                                                                               |                                                                                   |     |        | 0.636 |
| the alpha diversity (Simpson index) | -0.14 (-0.26 to -0.02) | 12 | 1288 | 37.0 | ZHOU 2020[35]         | J | - | NP | cross-sectional studies           | human                                                                         | HIV+ individuals vs. HIV- individuals                                             | SMD | Fixed  | NP    |
| the alpha diversity (Simpson index) | -0.27 (-0.43 to -0.11) | 6  | 632  | 46.0 |                       |   |   |    |                                   |                                                                               | Men who have sex with men (MSM) vs. Non-MSM                                       |     |        |       |
| Shannon Index                       | 0.15 (-0.12 to 0.42)*  | 4  | NP   | NP   | SANADA 2020[36]       | K | - | NP | observational studies             | Major depressive disorder (MDD) patient                                       | Major depressive disorder (MDD) patient vs. controls.                             | SMD | random | NP    |
| Simpson index                       | 0.29 (-0.11 to 0.69)*  | 4  |      |      |                       |   |   |    |                                   |                                                                               |                                                                                   |     |        |       |
| observed species                    | -0.26 (-0.47 to -0.06) | 20 | 1686 | 75.0 | NIKOLOVA V L 2021[37] | V | - | NP | observational case-control design | general population (age 18-65 years) with a psychiatric diagnosis of interest | adult (age 18-65 years) with Psychiatric Disorders Compared With Healthy Controls | SMD | random | NP    |
|                                     | -0.16 (-0.58 to 0.27)* | 6  | NP   | 83.0 |                       |   |   |    |                                   |                                                                               | Patients With major depressive disorder vs. Healthy Controls                      |     |        |       |
|                                     | -0.61 (-1.19 to -0.03) | 3  |      | 80.0 |                       |   |   |    |                                   |                                                                               | Patients With bipolar disorder vs. Healthy Controls                               |     |        |       |
|                                     | -0.04 (-0.31 to 0.24)* | 4  |      | 35.0 |                       |   |   |    |                                   |                                                                               | Patients With psychosis                                                           |     |        |       |

|               |                        |    |      |      |                                                                                         |
|---------------|------------------------|----|------|------|-----------------------------------------------------------------------------------------|
|               |                        |    |      |      | and<br>schizophreni<br>a vs.Healthy<br>Controls                                         |
| Chao 1        | -0.50 (-0.79 to -0.21) | 26 | 1917 | 88.0 | Patients<br>With<br>Psychiatric<br>Disorders<br>Compared<br>With<br>Healthy<br>Controls |
|               | -0.34 (-1.08 to 0.40)* | 6  | NP   | 91.0 | Patients<br>With<br>Psychiatric<br>Disorders<br>Compared<br>With<br>Healthy<br>Controls |
|               | -0.53 (-1.01 to -0.05) | 4  | NP   | 62.0 | Patients<br>With bipolar<br>disorder<br>vs.Healthy<br>Controls                          |
|               | -0.58 (-1.29 to 0.12)* | 7  | NP   | 95.0 | Patients<br>With<br>psychosis<br>and<br>schizophreni<br>a vs.Healthy<br>Controls        |
|               | -0.86 (-1.52 to -0.21) | 4  | NP   | 80.0 | Patients<br>With<br>anorexia<br>nervosa<br>vs.Healthy<br>Controls                       |
| Shannon index | -0.12 (-0.27 to 0.03)* | 29 | 2348 | 67.0 | Patients<br>With<br>Psychiatric<br>Disorders<br>Compared<br>With<br>Healthy<br>Controls |

|                           |                        |    |     |      |                                                                                         |
|---------------------------|------------------------|----|-----|------|-----------------------------------------------------------------------------------------|
|                           | -0.28 (-0.62 to 0.06)  | 11 | NP  | 80.0 | Patients<br>With major<br>depressive<br>disorder<br>vs.Healthy<br>Controls              |
|                           | 0.09 (-0.43 to 0.62)*  | 4  | NP  | 73.0 | Patients<br>With bipolar<br>disorder<br>vs.Healthy<br>Controls                          |
|                           | -0.02 (-0.20 to 0.17)* | 8  | NP  | 47.0 | Patients<br>With<br>psychosis<br>and<br>schizophreni<br>a vs.Healthy<br>Controls        |
| Simpson index             | 0.04 (-0.13 to 0.21)*  | 11 | 795 | 30.0 | Patients<br>With<br>Psychiatric<br>Disorders<br>Compared<br>With<br>Healthy<br>Controls |
|                           | 0.14 (-0.14 to 0.43)*  | 5  | NP  | 42.0 | Patients<br>With major<br>depressive<br>disorder<br>vs.Healthy<br>Controls              |
|                           | 0.03 (-0.34 to 0.28) * | 3  | NP  | 6.0  | Patients<br>With bipolar<br>disorder<br>vs.Healthy<br>Controls                          |
| phylogenetic<br>diversity | -0.24 (-0.47 to 0.00)* | 10 | 866 | 64.0 | Patients<br>With<br>Psychiatric<br>Disorders<br>Compared<br>With<br>Healthy<br>Controls |

|                                 |                        |   |    |      |                              |   |    |   |                                                                                                           |                                                                    |    |  |         |    |  |  |  |                                                                                   |
|---------------------------------|------------------------|---|----|------|------------------------------|---|----|---|-----------------------------------------------------------------------------------------------------------|--------------------------------------------------------------------|----|--|---------|----|--|--|--|-----------------------------------------------------------------------------------|
|                                 | -0.42 (-0.96 to 0.13)* | 4 | NP | 83.0 |                              |   |    |   |                                                                                                           |                                                                    |    |  |         |    |  |  |  | Patients With major depressive disorder vs.Healthy Controls                       |
|                                 | -0.01 (-0.22 to 0.20)* | 3 | NP | 0.0  |                              |   |    |   |                                                                                                           |                                                                    |    |  |         |    |  |  |  | Patients With psychosis and schizophrenia vs.Healthy Controls                     |
| F. nucleatum prevalence         | 10.06 (4.48 to 22.58)  | 6 | NP | 0.0  | GETHINGS-B EHNCKE C 2020[38] | - | NP | - | ages over 16 individuals with colorectal cancer vs. individuals with colorectal polyp or healthy controls | colorectal tumor tissue compared with healthy tissue from controls | OR |  | rando m | NP |  |  |  |                                                                                   |
| F. nucleatum DNA being detected | 1.83 (1.07 to 3.16)    | 5 |    | 66.9 |                              |   |    |   |                                                                                                           |                                                                    |    |  |         |    |  |  |  | colorectal tumor tissue compared with polyp tissue                                |
|                                 | 2.51 (1.20 to 5.27)    | 3 |    | 0.0  |                              |   |    |   |                                                                                                           |                                                                    |    |  |         |    |  |  |  | in colorectal polyp tissue compared with healthy tissue from controls             |
|                                 | 2.51 (1.20 to 5.27)    | 7 |    | 50.0 |                              |   |    |   |                                                                                                           |                                                                    |    |  |         |    |  |  |  | colorectal cancer tissue compared with adjacent, normal tissue                    |
|                                 | 9.01 (3.39 to 23.95)   | 7 |    | 72.6 |                              |   |    |   |                                                                                                           |                                                                    |    |  |         |    |  |  |  | fecal samples from patients with colorectal cancer compared with healthy controls |

|                                                             |                          |                        |     |      |               |                |    |                                                                                                               |                                                                                                          |                                                                       |                     |       |                 |                 |
|-------------------------------------------------------------|--------------------------|------------------------|-----|------|---------------|----------------|----|---------------------------------------------------------------------------------------------------------------|----------------------------------------------------------------------------------------------------------|-----------------------------------------------------------------------|---------------------|-------|-----------------|-----------------|
| Poor overall survival among patients with colorectal cancer |                          | 1.87 (1.12 to 3.11)    | 5   |      | 60.6          |                |    |                                                                                                               |                                                                                                          | F. nucleatum positivity in tumor tissue                               |                     | HR    |                 |                 |
| disease-free survival among patients with colorectal cancer |                          | 1.48 (0.84 to 2.59)*   | 3   |      | 88.5          |                |    |                                                                                                               |                                                                                                          |                                                                       |                     |       |                 |                 |
| Lactobacillus                                               |                          | -2.72 (-5.94 to 0.50)* | 4   | NP   | 98.3          | Liu H 2016[39] | -  | NP                                                                                                            | -                                                                                                        | microbiota studies in colorectal cancer (CRC) versus healthy controls |                     | SMD   | rando           | No serious bias |
| Bifidobacterium                                             |                          | -3.30 (-6.57 to -0.03) | 4   |      | 98.2          |                |    |                                                                                                               |                                                                                                          |                                                                       |                     |       | m               |                 |
| Bacteroides-Prevotella                                      |                          | -0.71 (-2.56 to 1.14)* | 3   |      | 96.3          |                |    |                                                                                                               |                                                                                                          |                                                                       |                     |       |                 |                 |
| Faecalibacterium                                            |                          | -0.33 (-0.60 to -0.05) | 3   |      | 0.0           |                |    |                                                                                                               |                                                                                                          |                                                                       |                     |       |                 |                 |
| abundance of Escherichia                                    | 1.55 (0.57 to 2.54)      | 6                      | 294 | 92.0 | LI F 2021[40] | -              | NP | Any study that provides necessary data on detecting gut microbiota for NAFLD patients and comparable controls | Patients with Nonalcoholic fatty liver disease (NAFLD) diagnosed with sonographic or histologic evidence | Vs. Healthy control                                                   | SMD                 | rando | No serious bias |                 |
| abundance of Prevotella                                     | 1.89 (0.02 to 3.76)      | 8                      | 502 | 98.0 |               |                |    |                                                                                                               |                                                                                                          |                                                                       |                     |       |                 |                 |
| abundance of Streptococcus                                  | 1.33 (0.62 to 2.05)      | 6                      | 418 | 92.0 |               |                |    |                                                                                                               |                                                                                                          |                                                                       |                     |       |                 |                 |
| genera Coprococcus                                          | -1.75 (-3.13 to -0.37),  | 4                      | 197 | 95.0 |               |                |    |                                                                                                               |                                                                                                          |                                                                       |                     |       |                 |                 |
| Faecalibacterium                                            | -13.23 (-17.59 to -8.87) | 7                      | 557 | 99.0 |               |                |    |                                                                                                               |                                                                                                          |                                                                       |                     |       |                 |                 |
| Ruminococcus                                                | -1.84 (-2.41 to -1.27)   | 6                      | 362 | 82.0 |               |                |    |                                                                                                               |                                                                                                          |                                                                       |                     |       |                 |                 |
| Bacteroides                                                 | -2.12 (-4.49 to 0.25)*   | 7                      | 497 | 98.0 |               |                |    |                                                                                                               |                                                                                                          |                                                                       |                     |       |                 |                 |
| Bifidobacterium                                             | -0.68 (-1.89 to 0.53)*   | 4                      | 185 | 95.0 |               |                |    |                                                                                                               |                                                                                                          |                                                                       |                     |       |                 |                 |
| Blautia                                                     | 0.17 (-1.38 to 1.73)*    | 8                      | 504 | 98.0 |               |                |    |                                                                                                               |                                                                                                          |                                                                       |                     |       |                 |                 |
| Clostridium                                                 | 0.42 (-0.80 to 1.64)*    | 5                      | 352 | 94.0 |               |                |    |                                                                                                               |                                                                                                          |                                                                       |                     |       |                 |                 |
| Dorea                                                       | 1.45 (-0.20 to 3.10)*    | 4                      | 241 | 98.0 |               |                |    |                                                                                                               |                                                                                                          |                                                                       |                     |       |                 |                 |
| Lactobacillus                                               | -0.05 (-0.82 to 0.72)*   | 5                      | 274 | 88.0 |               |                |    |                                                                                                               |                                                                                                          |                                                                       |                     |       |                 |                 |
| Parabacteroides                                             | 0.49 (-0.26 to 1.24)*    | 6                      | 357 | 82.0 |               |                |    |                                                                                                               |                                                                                                          |                                                                       |                     |       |                 |                 |
| Roseburia                                                   | -0.90 (-2.70 to 0.91)*   | 5                      | 224 | 96.0 |               |                |    |                                                                                                               |                                                                                                          |                                                                       |                     |       |                 |                 |
| concentration of acetate                                    | 0.05 (-0.16 to 0.27)*    | 8                      | NP  | 44.0 | SUN 2018[41]  | Q              | -  | NP                                                                                                            | the study design for comparing patients with IBS versus                                                  | Irritable bowel syndrome (IBS), age<12 years was excluded             | Vs. Healthy control | SMD   | fixed           | 0.17            |
| proportion of acetate                                       | -0.27 (-0.59 to 0.05)*   | 4                      |     | 57.0 |               |                |    |                                                                                                               |                                                                                                          |                                                                       |                     |       | fixed           | NP              |

|                            |    |                           |    |          |       |                      |   |   |                                                                |                                        |                                          |      |  |                                                                                                                                                     |  |         |                 |
|----------------------------|----|---------------------------|----|----------|-------|----------------------|---|---|----------------------------------------------------------------|----------------------------------------|------------------------------------------|------|--|-----------------------------------------------------------------------------------------------------------------------------------------------------|--|---------|-----------------|
| concentration propionate   | of | -0.04 (-0.52 to 0.44)*    | 8  |          | 76.0  |                      |   |   |                                                                |                                        |                                          |      |  | HCs was that of case-control, and that for comparing pretreatment with posttreatment was randomized controlled trial (RCT) or self-controlled study |  | rando m | 0.24            |
| proportion propionate      | of | 0.44 (0.12 to 0.76)       | 4  |          | 0.0   |                      |   |   |                                                                |                                        |                                          |      |  |                                                                                                                                                     |  | fixed   | NP              |
| concentration butyrate     | of | 0.12 (-0.11 to 0.35)*     | 7  |          | 50.0  |                      |   |   |                                                                |                                        |                                          |      |  |                                                                                                                                                     |  | fixed   | 0.64            |
| proportion butyrate        | of | 0.05 (-0.68 to 0.78)*     | 4  |          | 80.0  |                      |   |   |                                                                |                                        |                                          |      |  |                                                                                                                                                     |  | rando m | NP              |
| concentration iso-butyrate | of | -0.15 (-0.91 to 0.60)*    | 4  |          | 81.0  |                      |   |   |                                                                |                                        |                                          |      |  |                                                                                                                                                     |  | rando m |                 |
| proportion iso-butyrate    | of | 0.25 (-0.07 to 0.56)      | 4  |          | 0.0   |                      |   |   |                                                                |                                        |                                          |      |  |                                                                                                                                                     |  | fixed   |                 |
| concentration valerate     | of | -0.03 (-0.35 to 0.28)*    | 4  |          | 51.0  |                      |   |   |                                                                |                                        |                                          |      |  |                                                                                                                                                     |  | fixed   |                 |
| proportion valerate        | of | -0.19 (-1.07 to 0.69)*    | 4  |          | 86.0  |                      |   |   |                                                                |                                        |                                          |      |  |                                                                                                                                                     |  | rando m |                 |
| concentration iso-valerate | of | -0.38 (-1.18 to 0.42)*    | 4  |          | 83.0  |                      |   |   |                                                                |                                        |                                          |      |  |                                                                                                                                                     |  | rando m |                 |
| proportion iso-valerate.   | of | -0.43 (-1.54 to 0.69)*    | 4  |          | 91.0  |                      |   |   |                                                                |                                        |                                          |      |  |                                                                                                                                                     |  | rando m |                 |
| Streptococcus              |    | -0.999 (-1.547 to -0.449) | 5  | 642/998  | 21.57 | ANDREO2021 [42]      | - | - | controlled trial                                               | Children with Autism                   | with versus without Autism               | SMD+ |  |                                                                                                                                                     |  | rando m | NP              |
| Bifdobacterium             |    | -0.513 (-0.953 to -0.073) | 7  |          | 62.27 |                      |   |   |                                                                |                                        |                                          |      |  |                                                                                                                                                     |  |         | 0.575           |
| Prevotellaceae             |    | -0.37 (-0.62 to -0.11)    | 9  | 592/1038 | 72.0  | SHEN T 2021 [43]     | - | - | NP                                                             | patients with Parkinson's disease (PD) | patients with PD versus healthy controls | SMD  |  |                                                                                                                                                     |  | Fixed   | No serious bias |
| Faecalibacterium           |    | -0.41 (-0.57 to -0.24)    | 5  | 422/663  | 52.0  |                      |   |   |                                                                |                                        |                                          |      |  |                                                                                                                                                     |  |         |                 |
| Lachnospiraceae            |    | -0.34 (-0.59 to -0.09)    | 7  | 592/997  | 67.0  |                      |   |   |                                                                |                                        |                                          |      |  |                                                                                                                                                     |  |         |                 |
| Bifidobacteriaceae         |    | 0.38 (0.12 to 0.63)       | 7  | 630/1080 | 72.0  |                      |   |   |                                                                |                                        |                                          |      |  |                                                                                                                                                     |  |         |                 |
| Ruminococcaceae            |    | 0.58 (0.07 to 1.10)       | 9  | 499/871  | 91.0  |                      |   |   |                                                                |                                        |                                          |      |  |                                                                                                                                                     |  |         |                 |
| Verrucomicrobiaceae        |    | 0.45 (0.21 to 0.69)       | 7  | 624/1061 | 68.0  |                      |   |   |                                                                |                                        |                                          |      |  |                                                                                                                                                     |  |         |                 |
| Christensenellaceae        |    | 0.20 (0.07 to 0.34)       | 7  | 532/884  | 0.0   |                      |   |   |                                                                |                                        |                                          |      |  |                                                                                                                                                     |  |         |                 |
| Helicobacter pylori        |    | 1.68 (1.00 to 2.84)       | 14 | 928/2500 | NP    | JORGENSEN A 2017[44] | - | - | Case-control , cross-sectional, cohort, or nested case-control | rosacea patients                       | rosacea patients with control groups.    | OR   |  |                                                                                                                                                     |  | rando m | No serious bias |

\* No statistical significance; CI, confidence interval; RCT, randomized controlled trial; RR, relative risk; HR, hazard ratio; MD, mean difference; SMD, standard mean difference; WMD, weighted mean difference; OR, odds ratio; NA, not available; NP, not published.

## References

1. Capurso, G.; Signoretti, M.; Archibugi, L.; Stigliano, S.; Delle Fave, G. Systematic review and meta-analysis: Small intestinal bacterial overgrowth in chronic pancreatitis. *United European Gastroenterology Journal* **2016**, *4*, 697-705, doi: 10.1177/2050640616630117.
2. Shah, A.; Shanahan, E.; Macdonald, G.; Fletcher, L.; Ghasemi, P.; Morrison, M.; Jones, M.; Holtmann, G. Systematic Review and Meta-Analysis: Prevalence of Small Intestinal Bacterial Overgrowth in Chronic Liver Disease. *Semin. Liver Dis.* **2017**, *37*, 388-400, doi: 10.1055/s-0037-1608832.
3. Maslennikov, R.; Pavlov, C.; Ivashkin, V. Small intestinal bacterial overgrowth in cirrhosis: systematic review and meta-analysis. *Hepatol. Int.* **2018**, *12*, 567-576, doi: 10.1007/s12072-018-9898-2.
4. Wijarnpreecha, K.; Lou, S.; Watthanasuntorn, K.; Kroner, P.T.; Cheungpasitporn, W.; Lukens, F.J.; Pungpapong, S.; Keaveny, A.P.; Ungprasert, P. Small intestinal bacterial overgrowth and nonalcoholic fatty liver disease: a systematic review and meta-analysis. *Eur. J. Gastroen. Hepat.* **2020**, *32*, 601-608, doi: 10.1097/MEG.0000000000001541.
5. Ghoshal, U.C.; Nehra, A.; Mathur, A.; Rai, S. A meta-analysis on small intestinal bacterial overgrowth in patients with different subtypes of irritable bowel syndrome. *J. Gastroen. Hepatol.* **2020**, *35*, 922-931, doi: 10.1111/jgh.14938.
6. Chen, B.; Kim, J.J.; Zhang, Y.; Du, L.; Dai, N. Prevalence and predictors of small intestinal bacterial overgrowth in irritable bowel syndrome: a systematic review and meta-analysis. *J. Gastroenterol.* **2018**, *53*, 807-818, doi: 10.1007/s00535-018-1476-9.
7. Gandhi, A.; Shah, A.; Jones, M.P.; Koloski, N.; Talley, N.J.; Morrison, M.; Holtmann, G. Methane positive small intestinal bacterial overgrowth in inflammatory bowel disease and irritable bowel syndrome: A systematic review and meta-analysis. *Gut Microbes* **2021**, *13*, 1933313, doi: 10.1080/19490976.2021.1933313.
8. Feng, X.; Li, X.; Jiang, Z. Prevalence and predictors of small intestinal bacterial overgrowth in systemic sclerosis: a systematic review and meta-analysis. *Clin. Rheumatol.* **2021**, *40*, 3039-3051, doi: 10.1007/s10067-020-05549-8.
9. Wijarnpreecha, K.; Werlang, M.E.; Watthanasuntorn, K.; Panjawatanan, P.; Cheungpasitporn, W.; Gomez, V.; Lukens, F.J.; Ungprasert, P. Obesity and Risk of Small Intestine Bacterial Overgrowth: A Systematic Review and Meta-Analysis. *Digest. Dis. Sci.* **2020**, *65*, 1414-1422, doi: 10.1007/s10620-019-05887-x.
10. Li, X.; Feng, X.; Jiang, Z.; Jiang, Z. Association of small intestinal bacterial overgrowth with Parkinson's disease: a systematic review and meta-analysis. *Gut Pathog.* **2021**, *13*, doi: 10.1186/s13099-021-00420-w.
11. Zeng, Y.; Guo, M.; Fang, X.; Teng, F.; Tan, X.; Li, X.; Wang, M.; Long, Y.; Xu, Y. Gut Microbiota-Derived Trimethylamine N-Oxide and Kidney Function: A Systematic Review and Meta-Analysis. *Adv. Nutr.* **2021**, *12*, 1286-1304, doi: 10.1093/advances/nmab010.

12. Farhangi, M.A.; Vajdi, M.; Asghari-Jafarabadi, M. Gut microbiota-associated metabolite trimethylamine N-Oxide and the risk of stroke: a systematic review and dose-response meta-analysis. *Nutr. J.* **2020**, *19*, 76, doi: 10.1186/s12937-020-00592-2.
13. Yao, M.; Liao, P.; Zhao, X.; Wang, L. Trimethylamine-N-oxide has prognostic value in coronary heart disease: a meta-analysis and dose-response analysis. *BMC Cardiovasc. Disor.* **2020**, *20*, doi: 10.1186/s12872-019-01310-5.
14. Qi, J.; You, T.; Li, J.; Pan, T.; Xiang, L.; Han, Y.; Zhu, L. Circulating trimethylamine N-oxide and the risk of cardiovascular diseases: a systematic review and meta-analysis of 11 prospective cohort studies. *J. Cell. Mol. Med.* **2018**, *22*, 185-194, doi: 10.1111/jcmm.13307.
15. Schiattarella, G.G.; Sannino, A.; Toscano, E.; Giugliano, G.; Gargiulo, G.; Franzone, A.; Avvedimento, M.; Trimarco, B.; Esposito, G.; Perrino, C. P1482 Gut microbe-generated metabolite trimethylamine-N-oxide and cardiovascular risk: a systematic review and meta-analysis of mortality outcome. *Eur. Heart J.* **2017**, *38*, 304, doi: 10.1093/eurheartj/ehx502.P1482.
16. Farhangi, M.A. Gut microbiota-dependent trimethylamine N-oxide and all-cause mortality: Findings from an updated systematic review and meta-analysis. *Nutrition* **2020**, *78*, 110856, doi: 10.1016/j.nut.2020.110856.
17. Heianza, Y.; Ma, W.; Manson, J.E.; Rexrode, K.M.; Qi, L. Gut Microbiota Metabolites and Risk of Major Adverse Cardiovascular Disease Events and Death: A Systematic Review and Meta-Analysis of Prospective Studies. *J. Am. Heart Assoc.* **2017**, *6*, e4947, doi: 10.1161/JAHA.116.004947.
18. Guasti, L.; Galliazzo, S.; Molaro, M.; Visconti, E.; Pennella, B.; Gaudio, G.V.; Lupi, A.; Grandi, A.M.; Squizzato, A. TMAO as a biomarker of cardiovascular events: a systematic review and meta-analysis. *Intern. Emerg. Med.* **2021**, *16*, 201-207, doi: 10.1007/s11739-020-02470-5.
19. Abbasalizad Farhangi, M.; Vajdi, M. Gut microbiota-associated trimethylamineN -oxide and increased cardiometabolic risk in adults: a systematic review and dose-response meta-analysis. *Nutr. Rev.* **2021**, *79*, 1022-1042, doi: 10.1093/nutrit/nuaa111.
20. Ge, X.; Zheng, L.; Zhuang, R.; Yu, P.; Xu, Z.; Liu, G.; Xi, X.; Zhou, X.; Fan, H. The Gut Microbial Metabolite Trimethylamine N-Oxide and Hypertension Risk: A Systematic Review and Dose-Response Meta-analysis. *Adv. Nutr.* **2019**, *11*, 66-76, doi: 10.1093/advances/nmz064.
21. Zhuang, R.; Ge, X.; Han, L.; Yu, P.; Gong, X.; Meng, Q.; Zhang, Y.; Fan, H.; Zheng, L.; Liu, Z.; et al. Gut microbe-generated metabolite trimethylamineN -oxide and the risk of diabetes: A systematic review and dose-response meta-analysis. *Obes. Rev.* **2019**, *20*, 883-894, doi: 10.1111/obr.12843.
22. Li, W.; Huang, A.; Zhu, H.; Liu, X.; Huang, X.; Huang, Y.; Cai, X.; Lu, J.; Huang, Y. Gut microbiota-derived trimethylamineN -oxide is associated with poor prognosis in patients with heart failure. *Med. J. Australia* **2020**, *213*, 374-379, doi: 10.5694/mja2.50781.
23. Dehghan, P.; Farhangi, M.A.; Nikniaz, L.; Nikniaz, Z.; Asghari Jafarabadi, M. Gut microbiota-derived metabolite trimethylamine N-oxide (TMAO) potentially increases the risk of obesity in adults: An exploratory systematic review and dose-response meta- analysis. *Obes. Rev.* **2020**, *21*, e12993, doi: 10.1111/obr.12993.
24. Farhangi, M.A.; Vajdi, M. Novel findings of the association between gut microbiota-derived metabolite trimethylamineN- oxide and inflammation: results from a systematic review and dose-response meta-analysis. *Crit. Rev. Food Sci.* **2020**, *60*, 2801-2823, doi: 10.1080/10408398.2020.1770199.
25. Luther, J.; Dave, M.; Higgins, P.D.R.; Kao, J.Y. Association between Helicobacter pylori infection and inflammatory bowel disease. *Inflamm. Bowel Dis.* **2010**, *16*, 1077-1084, doi: 10.1002/ibd.21116.
26. Liu, R.; Liu, Q.; He, Y.; Shi, W.; Xu, Q.; Yuan, Q.; Lin, Q.; Li, B.; Ye, L.; Min, Y.; et al. Association between Helicobacter pylori infection and nonalcoholic fatty liver. *Medicine* **2019**, *98*, e17781, doi: 10.1097/MD.00000000000017781.
27. Dardiotis, E.; Sokratous, M.; Tsouris, Z.; Siokas, V.; Mentis, A.F.A.; Aloizou, A.M.; Michalopoulou, A.; Bogdanos, D.P.; Xiromerisiou, G.; Deretzi, G.; et al. Association between Helicobacter py lori infection and Guillain-Barré Syndrome: A meta-analysis. *Eur. J. Clin. Invest.* **2020**, *50*, doi: 10.1111/eci.13218.



28. Ng, Q.X.; Foo, N.X.; Loke, W.; Koh, Y.Q.; Seah, V.J.M.; Soh, A.Y.S.; Yeo, W.S. Is there an association between *Helicobacter pylori* infection and irritable bowel syndrome? A meta-analysis. *World J. Gastroentero.* **2019**, *25*, 5702-5710, doi: 10.3748/wjg.v25.i37.5702.
29. Cao, Y.; Shen, J.; Ran, Z.H. Association between *Faecalibacterium prausnitzii* Reduction and Inflammatory Bowel Disease: A Meta-Analysis and Systematic Review of the Literature. *Gastroent. Res. Pract.* **2014**, *2014*, 1-7, doi: 10.1155/2014/872725.
30. Prosberg, M.; Bendtsen, F.; Vind, I.; Petersen, A.M.; Gluud, L.L. The association between the gut microbiota and the inflammatory bowel disease activity: a systematic review and meta-analysis. *Scand. J. Gastroentero.* **2016**, *51*, 1407-1415, doi: 10.1080/00365521.2016.1216587.
31. Zhuang, X.; Li, T.; Li, M.; Huang, S.; Qiu, Y.; Feng, R.; Zhang, S.; Chen, M.; Xiong, L.; Zeng, Z. Systematic Review and Meta-analysis: Short-Chain Fatty Acid Characterization in Patients With Inflammatory Bowel Disease. *Inflamm. Bowel Dis.* **2019**, *25*, 1751-1763, doi: 10.1093/ibd/izz188.
32. Safadi, J.M.; Quinton, A.M.G.; Lennox, B.R.; Burnet, P.W.J.; Minichino, A. Gut dysbiosis in severe mental illness and chronic fatigue: a novel trans-diagnostic construct? A systematic review and meta-analysis. *Mol. Psychiatr.* **2022**, *27*, 141-153, doi: 10.1038/s41380-021-01032-1.
33. Wang, L.; Alammari, N.; Singh, R.; Nanavati, J.; Song, Y.; Chaudhary, R.; Mullin, G.E. Gut Microbial Dysbiosis in the Irritable Bowel Syndrome: A Systematic Review and Meta-Analysis of Case-Control Studies. *J. Acad. Nutr. Diet.* **2020**, *120*, 565-586, doi: 10.1016/j.jand.2019.05.015.
34. Kim, K.N.; Yao, Y.; Ju, S.Y. Short Chain Fatty Acids and Fecal Microbiota Abundance in Humans with Obesity: A Systematic Review and Meta-Analysis. *Nutrients* **2019**, *11*, 2512, doi: 10.3390/nu11102512.
35. Zhou, J.; Zhang, Y.; Cui, P.; Luo, L.; Chen, H.; Liang, B.; Jiang, J.; Ning, C.; Tian, L.; Zhong, X.; et al. Gut Microbiome Changes Associated With HIV Infection and Sexual Orientation. *Front. Cell. Infect. Mi.* **2020**, *10*, 434, doi: 10.3389/fcimb.2020.00434.
36. Sanada, K.; Nakajima, S.; Kurokawa, S.; Barceló-Soler, A.; Ikuse, D.; Hirata, A.; Yoshizawa, A.; Tomizawa, Y.; Salas-Valero, M.; Noda, Y.; et al. Gut microbiota and major depressive disorder: A systematic review and meta-analysis. *J. Affect. Disorders* **2020**, *266*, 1-13, doi: 10.1016/j.jad.2020.01.102.
37. Nikolova, V.L.; Hall, M.R.B.; Hall, L.J.; Cleare, A.J.; Stone, J.M.; Young, A.H. Perturbations in Gut Microbiota Composition in Psychiatric Disorders. *JAMA Psychiat.* **2021**, *78*, 1343, doi: 10.1001/jamapsychiatry.2021.2573.
38. Gethings-Behncke, C.; Coleman, H.G.; Jordao, H.W.T.; Longley, D.B.; Crawford, N.; Murray, L.J.; Kunzmann, A.T. *Fusobacterium nucleatum* in the Colorectum and Its Association with Cancer Risk and Survival: A Systematic Review and Meta-analysis. *Cancer Epidemiology, Biomarkers & Prevention* **2020**, *29*, 539-548, doi: 10.1158/1055-9965.EPI-18-1295.
39. Liu, H.; Wu, H.; Bilegsaikhan, E.; Liu, T.; Lu, E.X.; Shen, X. Differential expression of intestinal microbiota in colorectal cancer compared with healthy controls: A systematic review and meta-analysis. *Int. J. Clin. Exp. Med.* **2016**, *9*, 10923-10930.
40. Li, F.; Ye, J.; Shao, C.; Zhong, B. Compositional alterations of gut microbiota in nonalcoholic fatty liver disease patients: a systematic review and Meta-analysis. *Lipids Health Dis.* **2021**, *20*, 22, doi: 10.1186/s12944-021-01440-w.
41. Sun, Q.; Jia, Q.; Song, L.; Duan, L. Alterations in fecal short-chain fatty acids in patients with irritable bowel syndrome. *Medicine* **2019**, *98*, e14513, doi: 10.1097/MD.00000000000014513.
42. Andreo-Martínez, P.; Rubio-Aparicio, M.; Sánchez-Meca, J.; Veas, A.; Martínez-González, A.E. A Meta-analysis of Gut Microbiota in Children with Autism. *Journal of Autism and Developmental Disorders* **2022**, *52*, 1374-1387, doi: 10.1007/s10803-021-05002-y.

43. Shen, T.; Yue, Y.; He, T.; Huang, C.; Qu, B.; Lv, W.; Lai, H. The Association Between the Gut Microbiota and Parkinson's Disease, a Meta-Analysis. *Front. Aging Neurosci.* **2021**, *13*, 636545, doi: 10.3389/fnagi.2021.636545.
44. Jørgensen, A.R.; Egeberg, A.; Gideonsson, R.; Weinstock, L.B.; Thyssen, E.P.; Thyssen, J.P. Rosacea is associated with *Helicobacter pylori*: a systematic review and meta-analysis. *J. Eur. Acad. Dermatol.* **2017**, *31*, 2010-2015, doi: 10.1111/jdv.14352.
