# Supplementary material for: Gastrointestinal Microbiome and Multiple Health Outcomes: Umbrella Review
Source: MDPI journal article supplement (doi:10.3390/nu14183726), 2022-09-09
Supplement: s1 [file s1]

**Supplement Table S2.** Prebiotics/probiotics/synbiotics and mortality.

| outcome(s) of interest                           | estimated summary effect (95% CI) | number of studies / total studies | number of intervention group or total participants | Heterogeneity ( $I^2$ , %) | the first author + year of publication | Intervention                                                 | Duration of Intervention/follow-up | study design               | populations                                                                                                                                                 | outcome comparison                                                                                                          | meta-analysis metric | type of effect model | publication bias |
|--------------------------------------------------|-----------------------------------|-----------------------------------|----------------------------------------------------|----------------------------|----------------------------------------|--------------------------------------------------------------|------------------------------------|----------------------------|-------------------------------------------------------------------------------------------------------------------------------------------------------------|-----------------------------------------------------------------------------------------------------------------------------|----------------------|----------------------|------------------|
| All-cause mortality                              | 0.58(0.23 to 1.44)*               | 7                                 | 404                                                | 0.0                        | DALAL R 2017 [1]                       | probiotics                                                   | follow-up: 2 weeks to 3 months)    | randomised clinical trials | people with any grade of acute or chronic hepatic encephalopathy                                                                                            | probiotics in any dosage vs. placebo or no intervention, or with any other treatment in people with hepatic encephalopathy. | RR                   | random               | NP               |
| Effects of Probiotics on Mortality               | 0.77 (0.65 to 0.92)               | 27                                | 4117/8156                                          | 16.0                       | DERMYSHIE 2017 [2]                     | enteral administration of probiotics                         | NP                                 | All RCTs                   | very low birth weight (VLBW)( $<1,500$ g) preterm ( $<34$ weeks gestational age) infants with enteral administration of probiotics initiated within 10 days | enteral administration of probiotics vs. Control group                                                                      | RR                   | fixed                | 0.012            |
| Mortality (all-cause before hospital discharge ) | 0.76 (0.65 to 0.89)               | 51                                | 10170                                              | 0.0                        | SHARIF S 2020 [3]                      | any probiotic or probiotic combination for at least one week | at least one week                  | RCTs and quasi-RCTs        | very preterm ( $< 32$ weeks' gestation) or very low birth weight ( $< 1500$ g) infants                                                                      | any probiotic or probiotic combination vs. placebo or no treatment.                                                         | RR                   | fixed                | 0.11             |
| Mortality (all-cause before hospital discharge ) | 0.91 (0.71 to 1.16)*              | 6                                 | 1661                                               | 0.0                        |                                        |                                                              |                                    |                            | extremely preterm ( $< 28$ weeks' gestation) or extremely low birth weight ( $< 1000$ g) infants                                                            |                                                                                                                             |                      |                      | NP               |

|                                                   |                         |    |           |      |                               |                                                                                  |                                                         |          |                                                                                                   |                                                      |     |        |                 |
|---------------------------------------------------|-------------------------|----|-----------|------|-------------------------------|----------------------------------------------------------------------------------|---------------------------------------------------------|----------|---------------------------------------------------------------------------------------------------|------------------------------------------------------|-----|--------|-----------------|
| mortality                                         | 0.58<br>(0.46 to 0.75)  | 14 | 1789/3583 | 4.5  | YANG Y 2014 [4]               | enteral administration of any probiotic started within the first 10 days of life | at least 7 days                                         | All RCTs | preterm infants (without consideration of birth weight)                                           | probiotic vs. Placebo group                          | RR  | fixed  | No obvious bias |
| The effect of probiotics in decreasing death rate | 0.69<br>(0.55 to 0.87)  | 27 | 4399/8717 | 36.2 | JIANG T L 2020 [5]            | probiotics                                                                       | NP                                                      | All RCTs | preterm infants < 37 weeks and/or birth weight < 2500 g                                           | Probiotics vs. control                               | RR  | random | No obvious bias |
|                                                   | 0.52<br>(0.34 to 0.80)  | 12 | 1635/3175 | 42.7 |                               | mixed probiotics                                                                 |                                                         |          |                                                                                                   |                                                      |     |        |                 |
| Incidence of death.                               | 0.48<br>(0.36 to 0.64)  | 20 | 4286      | 0.0  | LIU D P 2020[6]               | administration of Lactobacillus for preventing NEC                               | NP                                                      | All RCTs | neonates of gestational age < 37 weeks                                                            | Lactobacillus with placebo                           | RR  | fixed  | No obvious bias |
| Incidence of death.                               | 0.74<br>(0.60 to 0.92)  | 15 | 2579/5053 | 29.0 | ZHU X L 2019[7]               | bifidobacteria treatment for preventing NEC                                      | NP                                                      | All RCTs | neonates with gestational age (GA) < 37 weeks                                                     | Bifidobacteria vs. control                           | RR  | fixed  | NP              |
| Mortality                                         | 1.17<br>(0.54 to 2.57)* | 7  | NP        | 20.4 | SKONIECZNA-ZYDECKA K 2018 [8] | treatment with pro-/pre-/synbiotics                                              | Preoperation 0-15 days, postoperation 0-until discharge | All RCTs | surgical patients                                                                                 | Probiotics vs. No probiotics                         | SMD | random | NP              |
| mortality                                         | 0.58<br>(0.36 to 0.94)  | 9  | 924       | 0.0  | CHI C 2019[9]                 | prebiotics                                                                       | 7-57 days                                               | All RCTs | low birth weight infants (<2500 g) or preterm infants (<36 weeks)                                 | vs. placebo                                          | RR  | random | 0.73            |
| operative mortality                               | 1.39<br>(0.57 to 3.44)* | 5  | NP        | NP   | Kinross JM 2013[10]           | prebiotic                                                                        | NP                                                      | All RCTs | patients underwent abdominal surgery with the use of a prebiotic, probiotic, or a synbiotic agent | Vs. either received a placebo or received no therapy | WMD | random | NA              |

\* No statistical significance; CI, confidence interval; RCT, randomized controlled trial; RR, relative risk; HR, hazard ratio; MD, mean

difference; SMD, standard mean difference; WMD, weighted mean difference; OR, odds ratio; NA, not available; NP, not published.

## References

1. Dalal, R.; Mcgee, R.G.; Riordan, S.M.; Webster, A.C. Probiotics for people with hepatic encephalopathy. *Cochrane Db. Syst. Rev.* **2021**, 2021, doi: 10.1002/14651858.CD008716.pub3.
2. Dermyshe, E.; Wang, Y.; Yan, C.; Hong, W.; Qiu, G.; Gong, X.; Zhang, T. The “Golden Age” of Probiotics: A Systematic Review and Meta-Analysis of Randomized and Observational Studies in Preterm Infants. *Neonatology* **2017**, *112*, 9-23, doi: 10.1159/000454668.
3. Sharif, S.; Meader, N.; Oddie, S.J.; Rojas-Reyes, M.X.; Mcguire, W. Probiotics to prevent necrotizing enterocolitis in very preterm or very low birth weight infants. *Cochrane Db. Syst. Rev.* **2020**, 2020, D5496, doi: 10.1002/14651858.CD005496.pub5.
4. Yang, Y.; Guo, Y.; Kan, Q.; Zhou, X.G.; Zhou, X.Y.; Li, Y. A meta-analysis of probiotics for preventing necrotizing enterocolitis in preterm neonates. *Braz. J. Med. Biol. Res.* **2014**, *47*, 804-810, doi: 10.1590/1414-431X20143857.
5. Jiang, T.; Zhang, H.; Xu, X.; Li, H.; Yang, J. Mixed probiotics decrease the incidence of stage II-III necrotizing enterocolitis and death: A systematic review and meta-analysis. *Microb. Pathogenesis* **2020**, *138*, 103794, doi: 10.1016/j.micpath.2019.103794.
6. Liu, D.; Shao, L.; Zhang, Y.; Kang, W. Safety and efficacy of Lactobacillus for preventing necrotizing enterocolitis in preterm infants. *Int. J. Surg.* **2020**, *76*, 79-87, doi: 10.1016/j.ijssu.2020.02.031.
7. Zhu, X.; Tang, X.; Qu, F.; Zheng, Y.; Zhang, W.; Diao, Y. Bifidobacterium may benefit the prevention of necrotizing enterocolitis in preterm infants: A systematic review and meta-analysis. *Int. J. Surg.* **2019**, *61*, 17-25, doi: 10.1016/j.ijssu.2018.11.026.
8. Skonieczna-zydecka, K.; Kaczmarczyk, M.; łoniewski, I.; Lara, L.; Koulaouzidis, A.; Misera, A.; Maciejewska, D.; Marlicz, W. A Systematic Review, Meta-Analysis, and Meta-Regression Evaluating the Efficacy and Mechanisms of Action of Probiotics and Synbiotics in the Prevention of Surgical Site Infections and Surgery-Related Complications. *Journal of Clinical Medicine* **2018**, *7*, 556, doi: 10.3390/jcm7120556.
9. Chi, C.; Buys, N.; Li, C.; Sun, J.; Yin, C. Effects of prebiotics on sepsis, necrotizing enterocolitis, mortality, feeding intolerance, time to full enteral feeding, length of hospital stay, and stool frequency in preterm infants: a meta-analysis. *Eur. J. Clin. Nutr.* **2019**, *73*, 657-670, doi: 10.1038/s41430-018-0377-6.
10. Kinross, J.M.; Markar, S.; Karthikesalingam, A.; Chow, A.; Penney, N.; Silk, D.; Darzi, A. A Meta-Analysis of Probiotic and Synbiotic Use in Elective Surgery. *Jpen.-Parenter. Enter.* **2013**, *37*, 243-253, doi: 10.1177/0148607112452306.
