# Supplementary material for: Gastrointestinal Microbiome and Multiple Health Outcomes: Umbrella Review
Source: MDPI journal article supplement (doi:10.3390/nu14183726), 2022-09-09
Supplement: s1 [file s1]

**Supplement Table S7.** Prebiotics/probiotics/synbiotics and other outcomes.

| outcome(s) of interest                      | estimated summary effect (95% CI) | number of studies / total studies | number of intervention group or total participants | Heterogeneity ( $I^2$ , %) | the first author + year of publication | Intervention                             | Duration of Intervention/follow-up | study design | populations                                               | outcome comparison                                   | meta-analysis metric                                              | type of effect model | publication bias |                 |
|---------------------------------------------|-----------------------------------|-----------------------------------|----------------------------------------------------|----------------------------|----------------------------------------|------------------------------------------|------------------------------------|--------------|-----------------------------------------------------------|------------------------------------------------------|-------------------------------------------------------------------|----------------------|------------------|-----------------|
| Detection of C. difficile in stool          | 0.86 (0.67 to 1.10)*              | 15                                | 1214                                               | 0.0                        | GOLDENBERG J Z 2017[1]                 | probiotics                               | NP                                 | All RCTs     | participants taking antibiotics                           | any versus none                                      | RR                                                                | random               | No serious bias  |                 |
| Length of hospital stay                     | -0.17 (-1.03 to 0.68)*            | 4                                 | NP                                                 | 0                          |                                        |                                          |                                    |              |                                                           |                                                      | MD                                                                |                      |                  |                 |
| the incidence of infection                  | 0.27(0.21 to 0.36)                | 16                                | 1243/2483                                          | 0.0                        | CHEN X R 2021[2]                       | early nutrition combined with probiotics | enteral (EEN) with                 | ≥ 14 days    | All RCTs                                                  | All patients met the criteria of severe stroke       | early enteral nutrition (EEN) combined with probiotics versus EEN | OR                   | Random           | No serious bias |
| the incidence of pulmonary infection        | 0.28(0.20 to 0.39)                | 16                                | 698/1391                                           | 0.0                        |                                        |                                          |                                    |              |                                                           |                                                      |                                                                   |                      |                  |                 |
| the incidence of urinary tract infection    | 0.23(0.13 to 0.43)                | 9                                 | 384/768                                            | 0.0                        |                                        |                                          |                                    |              |                                                           |                                                      |                                                                   |                      |                  |                 |
| the incidence of gastrointestinal infection | 0.30(0.14 to 0.66)                | 4                                 | 161/324                                            | 0.0                        |                                        |                                          |                                    |              |                                                           |                                                      |                                                                   |                      |                  |                 |
| the enteral nutrition target time           | -2.18(-2.56 to -1.80)             | 4                                 | 163/324                                            | 84.0                       |                                        |                                          |                                    |              |                                                           |                                                      | MD                                                                |                      |                  |                 |
| the length of hospital stay                 | -8.70(-13.24 to -4.16)            | 3                                 | 131/260                                            | 98.0                       |                                        |                                          |                                    |              |                                                           |                                                      |                                                                   |                      |                  |                 |
| Effects on Body Weight                      | -0.55 (-0.91 to -0.19) kg         | 10                                | 315/641                                            | 64.0                       | WANG Z 2019[3]                         | Probiotics                               | NP                                 | All RCTs     | adults (≥18 years old) individuals with a BMI > 25 kg m-2 | the probiotics vs. control groups                    | MD                                                                | random               | 0.446            |                 |
| Effects on Body Mass Index (BMI)            | -0.30 (-0.43 to -0.18) kg/m^2     | 11                                | 357/717                                            | 59.0                       |                                        |                                          |                                    |              |                                                           |                                                      |                                                                   |                      | 0.006            |                 |
|                                             | -0.29 (-0.46 to -0.12) kg         | 6                                 | 213                                                | 66.6                       |                                        |                                          |                                    |              |                                                           | Probiotics dosage ≥ 10 <sup>10</sup> CFU vs. control |                                                                   |                      | NP               |                 |

|                                |                               |    |         |      |                                                             |       |
|--------------------------------|-------------------------------|----|---------|------|-------------------------------------------------------------|-------|
|                                | m-2                           |    |         |      | groups                                                      |       |
|                                | -0.18<br>(-0.48 to 0.12) m-2* | 4  | 119     | 46.9 | Probiotics dosage < 10 <sup>10</sup> CFU vs. control groups |       |
|                                | -0.36<br>(-0.52 to 0.20) m-2* | 4  | 138     | 56.8 | Single probiotics species vs. control groups                |       |
|                                | -0.15<br>(-0.39 to 0.10) m-2* | 6  | 194     | 55.5 | Multiple probiotics species vs. control groups              |       |
| Effects on Waist Circumference | -1.20<br>(-2.21 to -0.19) cm  | 8  | 281/573 | 90.0 | the probiotics vs. control groups                           | 0.403 |
|                                | -1.53<br>(-2.64 to -0.41) cm  | 6  | 212     | 86.9 | Probiotics dosage ≥ 10 <sup>10</sup> CFU vs. control groups | NP    |
|                                | -0.32<br>(-0.84 to 0.20) cm*  | 2  | 69      | 0.0  | Probiotics dosage < 10 <sup>10</sup> CFU vs. control groups |       |
|                                | -1.69<br>(-3.04 to 0.33) cm   | 4  | 168     | 91.6 | Single probiotics species vs. control groups                |       |
|                                | -0.42<br>(-0.91 to 0.07) cm*  | 4  | 113     | 0.0  | Multiple probiotics species vs. control groups              |       |
|                                | -1.34<br>(-2.76 to 0.08) cm*  | 6  | 187     | 92.3 | Form of probiotics: Capsule or powder vs. control groups    |       |
|                                | -1.11<br>(-1.64 to -0.59) cm  | 2  | 94      | 0.0  | Form of probiotics: Food vs. control groups                 |       |
| Effects on Fat                 | -0.91<br>(-1.19 to            | 11 | 311/632 | 43.0 | the probiotics vs. control                                  | 0.335 |

|                                                 |                               |    |          |      |                    |     |                                                                                                             |           |                                                  |                                                                                                                                       |                                         |                                   |         |                 |  |       |
|-------------------------------------------------|-------------------------------|----|----------|------|--------------------|-----|-------------------------------------------------------------------------------------------------------------|-----------|--------------------------------------------------|---------------------------------------------------------------------------------------------------------------------------------------|-----------------------------------------|-----------------------------------|---------|-----------------|--|-------|
| Mass                                            | -0.63) kg                     |    |          |      |                    |     |                                                                                                             |           |                                                  |                                                                                                                                       |                                         | groups                            |         |                 |  |       |
| Effects on Fat Percentage                       | -0.92 (-1.27 to -0.56) %      | 6  | 224/450  | 57.0 |                    |     |                                                                                                             |           |                                                  |                                                                                                                                       |                                         | the probiotics vs. control groups |         |                 |  | 0.068 |
| the effect on body weight                       | -0.54 (-1.09 to 0.01) kg*     | 18 | 660/1239 | 0.0  | SUZUMURA 2019 [4]  | E A | Oral supplementation with probiotics or synbiotics as an isolated intervention or as part of a dietary plan | 3-24weeks | Randomized or quasi-randomized controlled trials | Overweight or obese adults (BMI ≥ 25 kg/m² and age ≥ 18 y) with no health conditions that potentially affect metabolism or body weigh | probiotics or synbiotics oersus Control | MD                                | rando m | No serious bias |  |       |
| the effect on BMI                               | -0.19 (-0.43 to 0.04) kg/m^2* | 15 | 447/895  | 51.0 |                    |     |                                                                                                             |           |                                                  |                                                                                                                                       |                                         |                                   |         |                 |  |       |
| the effect on waist circumference               | -0.82 (-1.43 to -0.21) cm     | 12 | 455/864  | 46.0 |                    |     |                                                                                                             |           |                                                  |                                                                                                                                       |                                         |                                   |         |                 |  |       |
| the effect on body weight                       | -1.24 (-2.57 to 0.01) kg*     | 4  | 147/301  | 0.0  |                    |     |                                                                                                             |           |                                                  |                                                                                                                                       |                                         | synbiotics vs control             |         |                 |  | NP    |
| the effect on BMI                               | -0.33 (-1.22 to 0.57) kg/m^2* | 2  | 50/100   | 0.0  |                    |     |                                                                                                             |           |                                                  |                                                                                                                                       |                                         |                                   |         |                 |  |       |
| the effect on waist circumference               | -3.39 (-5.07 to -1.72) cm     | 2  | 72/148   | 34.0 |                    |     |                                                                                                             |           |                                                  |                                                                                                                                       |                                         |                                   |         |                 |  |       |
| effect of the PFMP on body weight               | -0.91 (-1.59 to -0.22) kg     | 16 | NP       | 67.3 | MOHAMMADI 2021 [5] | H   | Probiotics fermented milk products (PFMP)                                                                   | 2-12weeks | All RCTs                                         | adult individuals >18 years old                                                                                                       | PFMP placebo                            | versus WMD                        | rando m | 0.555           |  |       |
| effect of the PFMP on BMI                       | -0.33 (-0.48 to 0.18) kg/m^2* | 15 |          | 0.0  |                    |     |                                                                                                             |           |                                                  |                                                                                                                                       |                                         |                                   |         |                 |  | 0.404 |
| effect of the PFMP on waist circumference       | -0.59 (-1.55 to 0.36) cm*     | 6  |          | 0.0  |                    |     |                                                                                                             |           |                                                  |                                                                                                                                       |                                         |                                   |         |                 |  | 0.348 |
| effect of the PFMP on body fat percentage       | -3.75 (-9.39 to 1.90)*        | 5  |          | 90.3 |                    |     |                                                                                                             |           |                                                  |                                                                                                                                       |                                         |                                   |         |                 |  | 0.402 |
| The effects of synbiotic supplementation on BMI | -0.12 (-0.40 to 0.16) kg/m^2* | 22 | NP       | 0.0  | HADI A 2020 [6]    |     | synbiotic supplements                                                                                       | ≥4 weeks  | All randomized clinical                          | participants over18 years                                                                                                             | synbiotic versus placebo                | WMD                               | rando m | 0.21            |  |       |

|                                                    |                               |    |     |        |                                                          |      |
|----------------------------------------------------|-------------------------------|----|-----|--------|----------------------------------------------------------|------|
| The effects of synbiotic supplementation on WC     | -2.07<br>(-3.11 to -1.03) cm  | 12 | 0.0 | trials | synbiotic versus placebo                                 | 0.68 |
|                                                    | -1.72<br>(-3.49 to 0.05) cm*  | 7  | 0.0 |        | Baseline BMI $\geq$ 30 versus placebo                    | NP   |
|                                                    | -2.25<br>(-3.53 to -0.97) cm  | 5  | 0.0 |        | Baseline BMI 25-30 versus placebo                        |      |
|                                                    | -1.30<br>(-3.44 to 0.83) cm*  | 6  | 0.0 |        | Duration $\geq$ 12 Weeks versus placebo                  |      |
|                                                    | -2.31<br>(-3.49 to -1.12) cm  | 6  | 0.0 |        | Duration < 12 Weeks versus placebo                       |      |
|                                                    | -1.97<br>(-3.06 to -0.86) cm  | 9  | 0.0 |        | Number of used strain: Multi versus placebo              |      |
|                                                    | -2.70<br>(-5.54 to 0.15) cm*  | 3  | 0.0 |        | Number of used strain: Single versus placebo             |      |
|                                                    | -2.26<br>(-4.76 to -0.37) cm* | 3  | 0.0 |        | Probiotic Dose > $2 \times 10^8$ CFU versus placebo      |      |
|                                                    | -1.69<br>(-3.23 to -0.16) cm  | 8  | 0.0 |        | Probiotic Dose $\leq$ $2 \times 10^8$ CFU versus placebo |      |
| The effects of synbiotic supplementation on weight | -0.80<br>(-1.56 to -0.03) kg  | 20 | 0.0 |        | synbiotic versus placebo                                 | 0.37 |
|                                                    | -0.54<br>(-2.93 to 1.85) kg*  | 9  | 0.0 |        | Duration $\geq$ 12 Weeks versus placebo                  | NP   |
|                                                    | -0.83<br>(-1.63 to -0.02) kg  | 11 | 0.0 |        | Duration < 12 Weeks versus placebo                       |      |
|                                                    | -1.48<br>(-2.68 to -0.28) kg  | 14 | 0.0 |        | Number of used strain: Multi versus placebo              |      |

|                                                                                                        |  |                                                |    |         |      |                            |                       |                             |          |                                                                                                                                                 |                                                                   |    |  |        |                             |  |  |      |  |
|--------------------------------------------------------------------------------------------------------|--|------------------------------------------------|----|---------|------|----------------------------|-----------------------|-----------------------------|----------|-------------------------------------------------------------------------------------------------------------------------------------------------|-------------------------------------------------------------------|----|--|--------|-----------------------------|--|--|------|--|
|                                                                                                        |  | -0.33<br>(-1.32 to<br>0.67 ) kg*               | 6  |         | 0.0  |                            |                       |                             |          |                                                                                                                                                 |                                                                   |    |  |        | Number of used<br>strain:   |  |  |      |  |
|                                                                                                        |  |                                                |    |         |      |                            |                       |                             |          |                                                                                                                                                 |                                                                   |    |  |        | Single versus<br>placebo    |  |  |      |  |
| The effects of<br>synbiotic<br>supplementation<br>on body fat                                          |  | 0.02 (-1.27<br>to<br>1.87) %*                  | 6  |         | 67.3 |                            |                       |                             |          |                                                                                                                                                 |                                                                   |    |  |        | synbiotic versus<br>placebo |  |  | 0.38 |  |
| Effects on<br>waist-to-hip<br>ratio                                                                    |  | -0.01<br>(-0.01 to<br>-0.01)                   | 5  | 192/395 | 24.0 | PONTES K S D S 2021<br>[7] | probiotics            | NP                          | All RCTs | adults (18<br>years or older)<br>with<br>overweight or<br>obesity<br>defined<br>according to<br>local standards<br>for body mass<br>index (BMI) | Probiotics<br>versus placebo                                      | MD |  | random | No<br>serious<br>bias       |  |  |      |  |
| Effects on total<br>abdominal fat<br>area                                                              |  | -9.69<br>(-14.47 to<br>-4.91 ) cm <sup>2</sup> | 4  | 350     | 0.0  |                            |                       |                             |          |                                                                                                                                                 |                                                                   |    |  |        |                             |  |  |      |  |
| Effects on<br>subcutaneous<br>abdominal fat<br>area                                                    |  | -6.24<br>(-8.94 to<br>-3.54 ) cm <sup>2</sup>  | 5  | 445     | 0.0  |                            |                       |                             |          |                                                                                                                                                 |                                                                   |    |  |        |                             |  |  |      |  |
| Effects on<br>visceral<br>abdominal<br>fat area                                                        |  | -3.46<br>(-6.55 to<br>0.38 ) cm <sup>2</sup> * | 4  | 350     | 41.0 |                            |                       |                             |          |                                                                                                                                                 |                                                                   |    |  |        |                             |  |  |      |  |
| Effects on<br>Homeostasis<br>Model of<br>Assessment for<br>Insulin<br>Resistance<br>Index<br>(HOMA-IR) |  | -0.08<br>(-0.34 to<br>0.18 ) *                 | 9  | 322/765 | 47.0 |                            |                       |                             |          |                                                                                                                                                 |                                                                   |    |  |        |                             |  |  |      |  |
| Effects of<br>probiotics on<br>systolic blood<br>pressure                                              |  | -0.23<br>(-0.57 to<br>0.12 )mm<br>Hg*          | 7  | 318/641 | 0.0  |                            |                       |                             |          |                                                                                                                                                 |                                                                   |    |  |        |                             |  |  |      |  |
| Effects of<br>probiotics on<br>diastolic blood<br>pressure                                             |  | -0.35<br>(-0.76 to<br>0.06 )mm<br>Hg*          | 7  | 318/641 | 0.0  |                            |                       |                             |          |                                                                                                                                                 |                                                                   |    |  |        |                             |  |  |      |  |
| the risk of<br>atopic<br>sensitization                                                                 |  | 0.89 (0.77<br>to 1.03)*                        | 17 | 2974    | 9.0  | ZHANG G 2016 [8]           | probiotics/synbiotics | Follow-up:1y - 2y<br>of age | All RCTs | children in<br>whom<br>outcome<br>assessment<br>performed                                                                                       | any<br>species/strains/<br>doses regimen<br>of live<br>probiotics | RR |  | random | 0.988                       |  |  |      |  |

[illegible]

| *                                             |      |                                          |    |         |      |                       |                                                  |         |                                                                 |                                                 |                                                                                                                             |                                                                                                            |     |        |       |                 |
|-----------------------------------------------|------|------------------------------------------|----|---------|------|-----------------------|--------------------------------------------------|---------|-----------------------------------------------------------------|-------------------------------------------------|-----------------------------------------------------------------------------------------------------------------------------|------------------------------------------------------------------------------------------------------------|-----|--------|-------|-----------------|
| body index                                    | mass | -0.25 (-0.48 to -0.03) kg/m <sup>2</sup> | 7  | 208/416 | 97.0 | COZZOLINO M 2020 [10] | therapy probiotics synbiotics.                   | with or | administration of probiotics or synbiotics at least for 8 weeks | All RCTs                                        | women with Polycystic ovary syndrome (PCOS) according to Rotterdam criteria undergoing therapy with probiotics or symbiotic | administration of probiotics or Synbiotics versus without therapy with probiotics or synbiotics or placebo | MD  | random | NP    |                 |
| body weight                                   |      | -0.75 (-1.45 to -0.05) kg                | 7  | 208/416 | 98.0 |                       |                                                  |         |                                                                 |                                                 |                                                                                                                             |                                                                                                            |     |        |       |                 |
| the modified Ferriman–Gallway score           |      | -1.00 (-1.75 to -0.26)                   | 3  | 90/180  | 83.0 |                       |                                                  |         |                                                                 |                                                 |                                                                                                                             |                                                                                                            |     |        |       |                 |
| Body Weight                                   |      | -0.11 (-0.34 to 0.13)*                   | 12 | 731     | 61.5 | LI Y L 2021 [11]      | probiotics, prebiotics, synbiotics intake separ- |         | 8 weeks to 3 months                                             | All RCTs                                        | women with a definite diagnosis of Polycystic ovary syndrome (PCOS)                                                         | probiotics, prebiotics, synbiotics intake separately or in combination with other drugs versus placebo     | SMD | random | 0.321 |                 |
| BMI                                           |      | -0.10 (-0.30 to 0.09)*                   | 13 | 791     | 47.3 |                       | ately or in combination with other drugs         |         |                                                                 |                                                 |                                                                                                                             |                                                                                                            |     |        |       | 0.150           |
| Waist circumference (WC)                      |      | 0.37 (-0.78 to 1.53)*                    | 5  | 316     | 95.5 |                       |                                                  |         |                                                                 |                                                 |                                                                                                                             |                                                                                                            |     |        |       | No serious bias |
| hip circumference (HC)                        |      | -0.25 (-0.78 to 0.27)*                   | 4  | NP      | 76.9 |                       |                                                  |         |                                                                 |                                                 |                                                                                                                             |                                                                                                            |     |        |       |                 |
| polymorphonuclear phagocytic capacity         |      | 0.74 (0.38 to 1.11)                      | 3  | NP      | NP   | MILLER L E 2017 [12]  | Bifidobacterium (B.) animalis ssp. lactis HN019  |         | 3-6 weeks                                                       | randomized or non-randomized controlled studies | healthy, elderly (≥60 years) adults                                                                                         | consumption of B. lactis HN019 vs. control                                                                 | SMD | random | NP    |                 |
| natural killer (NK) cell tumoricidal activity |      | 0.43 (0.08 to 0.78)                      | 3  | NP      | NP   |                       |                                                  |         |                                                                 |                                                 |                                                                                                                             |                                                                                                            |     |        |       |                 |
| Polymorphonuclear cell phagocytic capacity    |      | 1.37 (0.86 to 1.88)                      | 9  | NP      | 80.0 | Miller LE 2019[13]    | probiotic consumption                            |         | 3-12 weeks                                                      | prospective controlled studies                  | healthy older adults (mean age ≥ 60 years)                                                                                  | consumption of probiotic vs control                                                                        | SMD | random | 0.38  |                 |
| natural killer (NK) cell tumoricidal activity |      | 0.55 (0.37 to 0.73)                      | 15 |         | 43.0 |                       |                                                  |         |                                                                 |                                                 |                                                                                                                             |                                                                                                            |     |        |       | 0.51            |
| No-recovery (incomplete resolution of         |      | 0.67(0.56 to 0.79)                       | 10 | 574     | 48.0 | DALAL R 2017 [14]     | probiotics                                       |         | follow-up: month to months                                      | 1 to 3 randomised clinical trials               | people with any grade of acute or                                                                                           | probiotics in any dosage vs. placebo or no                                                                 | RR  | random | NP    |                 |

|                                         |          |                         |    |           |      |                                |                                                           |    |                                                   |                                                                                                                                                        |                                                                                   |    |        |                 |
|-----------------------------------------|----------|-------------------------|----|-----------|------|--------------------------------|-----------------------------------------------------------|----|---------------------------------------------------|--------------------------------------------------------------------------------------------------------------------------------------------------------|-----------------------------------------------------------------------------------|----|--------|-----------------|
| clinical symptoms)                      |          |                         |    |           |      |                                |                                                           |    |                                                   | chronic hepatic encephalopathy                                                                                                                         | intervention, or with any other treatment in people with hepatic encephalopathy . |    |        |                 |
| Effects of Probiotics Late-Onset Sepsis | of on    | 0.88 (0.80 to 0.97)     | 28 | 4304/8535 | 23.0 | DERMYSHI E 2017 [15]           | enteral administration of probiotics                      | NP | All RCTs                                          | very low birth weight (VLBW) (<1,500 g) preterm (<34 weeks gestational age) infants with enteral administration of probiotics initiated within 10 days | enteral administration of probiotics vs. Control group                            | RR | fixed  | 0.242           |
| incidence of Late onset sepsis (LOS)    | of onset | 0.79 (0.71 to 0.88)     | 25 | 2934/5868 | 0.0  | ACETI A 2017 [16]              | any probiotic                                             | NP | Randomized and quasi-randomized controlled trials | preterm infants (gestational age (GA) <37 weeks) received within one month of age any probiotic                                                        | any probiotic vs. placebo or no treatment                                         | RR | fixed  | No serious bias |
|                                         |          | 0.75 (0.65 to 0.86)     | 20 | 1705/3402 | 0.0  |                                |                                                           |    |                                                   | preterm infants (gestational age (GA) <37 weeks) (exclusively human-milk-fed)                                                                          |                                                                                   |    |        |                 |
|                                         |          | 0.77 (0.51 to 1.17)*    | 16 | 398/800   | 1.0  |                                |                                                           |    |                                                   | preterm infants (gestational age (GA) <37 weeks) (mixed feeding)                                                                                       |                                                                                   |    |        |                 |
| Effect on body mass index               |          | -0.39 ( -0.49 to -0.29) | 20 | NP        | 97.9 | HERNANDEZ-SAAVEDRA D 2018 [17] | Any prebiotic or probiotic treatment, or a combination of | NP | All RCTs                                          | Male and female patients of any age that presented at                                                                                                  | Vs. placebo                                                                       | MD | random | No serious bias |



|                                               |                             | kg/m² |      |      |                   |                              |    | both (synbiotic) |                    |                                                              |                                           | least 1 of the following:<br>NAFLD, steatosis, liver fibrosis, steatohepatitis |        |       |  |  |  |
|-----------------------------------------------|-----------------------------|-------|------|------|-------------------|------------------------------|----|------------------|--------------------|--------------------------------------------------------------|-------------------------------------------|--------------------------------------------------------------------------------|--------|-------|--|--|--|
| Liver stiffness as measured by the fibro scan | -0.62 (-0.89 to -0.35)      | 4     | 217  | 83.0 | KHAN M Y 2019[18] | probiotics and/or synbiotics | NP |                  | All RCTs           | adult patients older than 18 years of age with NAFLD or NASH | Vs. placebo                               | MD                                                                             | random | NP    |  |  |  |
| Infections Rate                               | 0.21 (0.11 to 0.41)         | 4     | 246  | 1.0  | SAWAS T 2015 [19] | probiotics                   | NP |                  | controlled studies | Liver transplantation                                        | Vs. placebo                               | RR                                                                             | fixed  | NP    |  |  |  |
| urinary tract infection (UTI)                 | 0.14 (0.04 to 0.47)         | 4     | 246  | 0.0  |                   |                              |    |                  |                    |                                                              |                                           |                                                                                |        |       |  |  |  |
| intra-abdominal infection                     | 0.27 (0.09 to 0.78)         | 4     | 246  | 0.0  |                   |                              |    |                  |                    |                                                              |                                           |                                                                                |        |       |  |  |  |
| length of hospital stay                       | -1.41 (-1.97 to -0.86) days | 3     | 196  | 0.0  |                   |                              |    |                  |                    |                                                              |                                           | MD                                                                             |        |       |  |  |  |
| duration of antibiotic use                    | -3.89 (-4.17 to -3.60) days | 3     | 196  | 80.0 |                   |                              |    |                  |                    |                                                              |                                           |                                                                                |        |       |  |  |  |
| Acute graft rejection                         | 0.73 (0.44 to 1.22)*        | 3     | 179  | 0.0  |                   |                              |    |                  |                    |                                                              |                                           | RR                                                                             |        |       |  |  |  |
| postoperative infection rate                  | 0.35 (0.24 to 0.50)         | 23    | 1696 | 47.0 | YANG Z 2017 [20]  | Probiotic or synbiotic       | NP |                  | All RCTs           | perioperative patient                                        | Vs. placebo or no probiotic intervention. | OR                                                                             | random | 0.006 |  |  |  |
| pneumonia                                     | 0.44 (0.28 to 0.68)         | 16    | 1276 | 0.0  |                   |                              |    |                  |                    |                                                              |                                           |                                                                                |        | 0.238 |  |  |  |
| urinary tract infection                       | 0.30 (0.16 to 0.55)         | 13    | 1151 | 0.0  |                   |                              |    |                  |                    |                                                              |                                           |                                                                                |        | 0.666 |  |  |  |
| wound infection                               | 0.58 (0.42 to 0.80)         | 18    | 1723 | 0.0  |                   |                              |    |                  |                    |                                                              |                                           |                                                                                |        | 0.097 |  |  |  |
| intra-abdominal abscess                       | 0.65 (0.28 to 1.55)         | 10    | 495  | 0.0  |                   |                              |    |                  |                    |                                                              |                                           |                                                                                |        | 0.744 |  |  |  |
| Postoperative mortality                       | 1.19 (0.52 to 2.74)         | 8     | 1648 | 21.0 |                   |                              |    |                  |                    |                                                              |                                           |                                                                                |        | 0.179 |  |  |  |
| lengths of                                    | -3.20                       | 12    | 807  | 89.0 |                   |                              |    |                  |                    |                                                              |                                           | MD                                                                             |        | 0.094 |  |  |  |



[illegible]

|                                                                     |                               |    |      |  |      |                             |                                    |                       |      |                |                                                                                                               |                                         |        |    |        |                 |      |
|---------------------------------------------------------------------|-------------------------------|----|------|--|------|-----------------------------|------------------------------------|-----------------------|------|----------------|---------------------------------------------------------------------------------------------------------------|-----------------------------------------|--------|----|--------|-----------------|------|
| overgrowth (SIBO)                                                   |                               |    |      |  |      |                             |                                    |                       |      |                | prospective single-arm trials and retrospective studies                                                       |                                         |        |    |        |                 |      |
| SIBO Decontamination Rate                                           | 1.61 (1.19 to 2.17)*          | 5  |      |  | 25.7 |                             |                                    |                       |      |                |                                                                                                               |                                         | RR     |    |        |                 |      |
| H <sub>2</sub> Volume in HBT                                        | -36.35 (-44.23 to -28.47) ppm | 4  |      |  | 0.0  |                             |                                    |                       |      |                |                                                                                                               |                                         | WMD    |    |        |                 |      |
| disease activity score in 28 joints (DAS28)                         | -0.11 (-0.47 to 0.24)*        | 3  | 132  |  | 87.0 | PAN H D 2017[24]            | probiotic                          | Follow up: 8-48 weeks | 8-48 | All RCTs       | patients with a clear diagnosis of RA and stable treatment of disease-modifying anti-rheumatic drugs (DMARDs) | probiotics vs. Placebo or no probiotics | MD     |    | random | NP              |      |
| quality-of-life (QoL)                                               | 0.36 (0.07 to 0.64)           | 11 | 1501 |  | 86.0 | Le Morvan Sequeira 2021[25] | De probiotic                       | 4 weeks-6 months      |      | All RCTs       | adults of both sexes and of all ages with IBS                                                                 | probiotics vs. Placebo                  | SMD    |    | random | NP              |      |
| seroprotection rate of H1N1 strain                                  | 1.83 (1.19 to 2.82)           | 6  | 386  |  | 0.0  | LEI W T 2017[26]            | probiotics, prebiotics, synbiotics | or                    | NP   | All RCTs       | human adults                                                                                                  | Probiotic vs. Control group             | OR     |    | random | 0.37            |      |
| seroconversion rate of H1N1 strain                                  | 0.52 (0.75 to 3.09)*          | 6  | 553  |  | 51.0 |                             |                                    |                       |      |                |                                                                                                               |                                         |        |    |        |                 | 0.95 |
| seroprotection rate of H3N2 strain                                  | 2.85 (1.59 to 5.10)           | 7  | 388  |  | 0.0  |                             |                                    |                       |      |                |                                                                                                               |                                         |        |    |        |                 | 0.86 |
| seroconversion rate of H3N2 strain                                  | 2.54 (0.93 to 6.91)*          | 6  | 553  |  | 83.0 |                             |                                    |                       |      |                |                                                                                                               |                                         |        |    |        |                 | 0.76 |
| seroprotection rate of B strain                                     | 0.99 (0.65 to 1.52)*          | 7  | 389  |  | 0.0  |                             |                                    |                       |      |                |                                                                                                               |                                         |        |    |        |                 | 0.61 |
| seroconversion rate of B strain                                     | 2.11 (1.38 to 3.21)           | 6  | 553  |  | 0.0  |                             |                                    |                       |      |                |                                                                                                               |                                         |        |    |        |                 | 0.47 |
| hemagglutination inhibition titers of A/H1N1 strain after influenza | 7.14 (2.73 to 11.55)          | 12 | 688  |  | 96.0 | YEH T L 2018[27]            | probiotics prebiotics              | or                    | NP   | Control trials | adults                                                                                                        | probiotics prebiotics placebo           | or vs. | MD | random | No serious bias |      |

|                                                                                 |                                                  |    |     |       |                       |                                                                                                                                                                                                        |                               |      |                                                        |                                                                                              |                           |     |        |                 |
|---------------------------------------------------------------------------------|--------------------------------------------------|----|-----|-------|-----------------------|--------------------------------------------------------------------------------------------------------------------------------------------------------------------------------------------------------|-------------------------------|------|--------------------------------------------------------|----------------------------------------------------------------------------------------------|---------------------------|-----|--------|-----------------|
| vaccination                                                                     |                                                  |    |     |       |                       |                                                                                                                                                                                                        |                               |      |                                                        |                                                                                              |                           |     |        |                 |
| hemagglutination inhibition titers of A/H3N2 strain after influenza vaccination | 17.19 (3.39 to 30.99)                            | 12 | 688 | 100.0 |                       |                                                                                                                                                                                                        |                               |      |                                                        |                                                                                              |                           |     |        |                 |
| hemagglutination inhibition titers of B strain after influenza vaccination      | 4.17 (0.37 to 7.96)                              | 12 | 688 | 94.0  |                       |                                                                                                                                                                                                        |                               |      |                                                        |                                                                                              |                           |     |        |                 |
| estimated glomerular filtration rate preservation                               | 2.10 (-1.31 to 5.52)*                            | 4  | 212 | 68.0  | TAO S 2019 [28]       | probiotics (specified probiotic or probiotic mixes) in any form (e.g., capsule, tablet or other food supplements or components), the probiotics could be administered at any dose and for any duration | Follow up: 6 weeks - 6 months | 6    | All RCTs                                               | the participants were diagnosed with CKD, whether undergoing dialysis or not                 | probiotics vs placebo     | MD  | random | 0.051           |
| total antioxidant capacity                                                      | 0.42 (0.18 to 0.66)                              | 5  | NP  | 0.0   | BAKHTIARY M 2021 [29] | probiotic, prebiotic, or synbiotic                                                                                                                                                                     | Follow up: 4-12 weeks         | 4-12 | All RCTs                                               | chronic kidney disease (CKD) patients                                                        | Vs. usual care or placebo | SMD | random | NP              |
| BMI                                                                             | 0.05 (-0.17 to 0.27)*                            | 6  |     | 0.0   |                       |                                                                                                                                                                                                        |                               |      |                                                        |                                                                                              |                           |     |        |                 |
| eGFR, estimated glomerular filtration rate                                      | 0.34 (-2.20 to 2.89 mL/min/1.73 m <sup>2</sup> * | 3  | 132 | 0.0   | MCFARLANE 2019[30]    | C prebiotics, probiotics, or synbiotics for a duration of at least 1 week                                                                                                                              | NP                            |      | RCT including crossover, cluster, or quasi-RCT designs | participants with CKD as defined by the Kidney Disease Outcome Quality Initiative Guidelines | Vs. comparison groups     | MD  | random | NP              |
| weight                                                                          | 0.40 (-0.95 to 1.74) kg*                         | 7  | 357 | 0.0   |                       |                                                                                                                                                                                                        |                               |      |                                                        |                                                                                              |                           |     |        |                 |
| BMI                                                                             | -0.06(-0.53 to 0.41) kg/m <sup>2</sup> *         | NP | NP  | 0.0   | BOCK P M 2021[31]     | any probiotic, prebiotic or synbiotic supplementation or combination of interventions with the aim of adjusting the gut                                                                                | Follow up: 4-12 weeks         | 4-12 | clinical trials                                        | adult participants with type 1 or 2 diabetes diagnosis                                       | Vs. Control group         | MD  | Random | No serious bias |

| microbiota                                         |       |                                           |    |      |      |                    |   |                                                                                                               |                   |                                                                                                |                                                                                                                 |                             |     |        |                 |  |
|----------------------------------------------------|-------|-------------------------------------------|----|------|------|--------------------|---|---------------------------------------------------------------------------------------------------------------|-------------------|------------------------------------------------------------------------------------------------|-----------------------------------------------------------------------------------------------------------------|-----------------------------|-----|--------|-----------------|--|
| Systolic pressure                                  | blood | -0.93 (-1.58 to -0.27)                    | 6  | NP   | 89.6 | HENDIJANI 2018[32] | F | probiotics in the form of any pharmaceutical formulations or dairy products                                   | NP                | (all) 10 randomized controlled trials (RCTs) and 1 single blinded trial and 2 crossover trials | adult diabetic patients                                                                                         | Vs. placebo                 | SMD | random | No serious bias |  |
| Diastolic pressure                                 | blood | -0.88 (-1.76 to -0.01)                    | 7  |      | 94.0 |                    |   |                                                                                                               |                   |                                                                                                |                                                                                                                 |                             |     |        |                 |  |
| the risk of developing asthma                      |       | 0.86 (0.73 to 1.01)*                      | 14 | 4138 | 0.0  | DU X Z 2019[33]    |   | Probiotics were supplemented since the pre-and/or postnatal periods, with ? 3 months of intervention duration | Follow up: 1-15 y | All RCTs                                                                                       | healthy children, with or without a high risk of developing allergic diseases and without concurrent treatments | probiotics vs placebo       | RR  | fixed  | No serious bias |  |
| Allergic rhinitis                                  |       | 1.03 (0.77 to 1.39)*                      | 5  | 1897 | 68.0 |                    |   |                                                                                                               |                   |                                                                                                |                                                                                                                 |                             |     | random |                 |  |
| Wheeze                                             |       | 0.94 (0.81 to 1.08)*                      | 8  | 1957 | 20.0 |                    |   |                                                                                                               |                   |                                                                                                |                                                                                                                 |                             |     | fixed  |                 |  |
| Positive aeroallergen skin-prick test (SPT) result |       | 0.74 (0.50 to 1.09)*                      | 4  | 870  | 0.0  |                    |   |                                                                                                               |                   |                                                                                                |                                                                                                                 |                             |     |        |                 |  |
| systolic pressure                                  | blood | -2.05 (-3.87 to -0.24)                    | 11 | 628  | 10.0 | CHI C 2020[34]     |   | Probiotics                                                                                                    | 3-24 weeks        | All RCTs                                                                                       | hypertension patients                                                                                           | probiotics vs placebo       | MD  | random | 0.68            |  |
| diastolic pressure                                 | blood | -1.26 (-2.51 to -0.00)                    | 12 | 688  | 0.0  |                    |   |                                                                                                               |                   |                                                                                                |                                                                                                                 |                             |     |        | 0.44            |  |
| BMI                                                |       | -1.03 (-1.28 to -0.79)                    | 8  | 398  | 0.0  |                    |   |                                                                                                               |                   |                                                                                                |                                                                                                                 |                             |     |        | 0.27            |  |
| Weight                                             |       | -1.54 (-4.83 to 1.75) kg*                 | 5  | NP   | 0.0  | HADI A 2021 [35]   |   | probiotics or synbiotics                                                                                      | 3-28 weeks        | All RCTs                                                                                       | adults with metabolic syndrome                                                                                  | probiotics vs control group | MD  | random | 0.53            |  |
| BMI                                                |       | -0.06 (-0.56 to 0.44) kg/m <sup>2</sup> * | 7  |      | 0.0  |                    |   |                                                                                                               |                   |                                                                                                |                                                                                                                 | probiotics vs placebo       |     |        | 0.31            |  |
| WC                                                 |       | -1.33 (-3.30 to 0.64) cm*                 | 6  |      | 28.9 |                    |   |                                                                                                               |                   |                                                                                                |                                                                                                                 |                             |     |        | 0.92            |  |
| eczema                                             |       | 0.59 (0.45 to 0.73)                       | 17 | 4011 | 69.0 | SUN S Y 2021[36]   |   | Probiotic started                                                                                             | NP                | All RCTs                                                                                       | participants                                                                                                    | Vs. placebo                 | OR  | random | NP              |  |

|                                                                                                                |                        |    |      |      |                    |                                                                                                                                                                                                   |                                             |          |                                                                      |                                                                                                                                         |     |        |       |  |
|----------------------------------------------------------------------------------------------------------------|------------------------|----|------|------|--------------------|---------------------------------------------------------------------------------------------------------------------------------------------------------------------------------------------------|---------------------------------------------|----------|----------------------------------------------------------------------|-----------------------------------------------------------------------------------------------------------------------------------------|-----|--------|-------|--|
|                                                                                                                | to 0.78)               |    |      |      |                    |                                                                                                                                                                                                   | during pregnancy or within 12 months of age |          |                                                                      | should be high risk, defined as at least one parent or older sibling of the enrolling infants who had doctor-diagnosed allergic disease |     | m      |       |  |
| atopic eczema                                                                                                  | 0.66 (0.48 to 0.91)    | 6  | 1193 | 8.0  |                    |                                                                                                                                                                                                   |                                             |          |                                                                      |                                                                                                                                         |     |        |       |  |
| asthma                                                                                                         | 0.88 (0.69 to 1.10)*   | 12 | 3209 | 15.0 |                    |                                                                                                                                                                                                   |                                             |          |                                                                      |                                                                                                                                         |     |        |       |  |
| rhinitis                                                                                                       | 0.83 (0.55 to 1.24)*   | 5  | 1214 | 42.0 |                    |                                                                                                                                                                                                   |                                             |          |                                                                      |                                                                                                                                         |     |        |       |  |
| wheeze                                                                                                         | 0.82 (0.67 to 1.01)*   | 8  | 1922 | 0.0  |                    |                                                                                                                                                                                                   |                                             |          |                                                                      |                                                                                                                                         |     |        |       |  |
| allergic disease                                                                                               | 0.83 (0.58 to 1.17)*   | 5  | 1556 | 44.0 |                    |                                                                                                                                                                                                   |                                             |          |                                                                      |                                                                                                                                         |     |        |       |  |
| sensation                                                                                                      | 0.99 (0.75 to 1.30)*   | 7  | 1174 | 10.0 |                    |                                                                                                                                                                                                   |                                             |          |                                                                      |                                                                                                                                         |     |        |       |  |
| Self-assessed eczema symptoms on a 20-point visual analogue scale of itch and sleep disturbance (SCORAD part C | -0.90 (-2.84 to 1.04)* | 5  | 309  | 79.0 | BOYLE R J 2009[37] | live orally ingested microorganisms, including bacteria, fungi or yeasts, ingested singly or in combination-organisms were presumed to be live unless the authors specified that they were killed | NP                                          | All RCTs | participants of any age with doctor-diagnosed eczema                 | Vs. control group received no treatment, placebo or another non-microbial intervention                                                  | MD  | random | NP    |  |
| nvestigator-rated eczema severity (total SCORAD) at the end of treatment                                       | -2.46 (-7.45 to 2.53)* | 7  | 588  | 76.0 |                    |                                                                                                                                                                                                   |                                             |          |                                                                      |                                                                                                                                         |     |        |       |  |
| Ventilator-associated pneumonia (VAP) Incidence                                                                | 0.67 (0.59 to 0.77)    | 20 | 2428 | 11.3 | JI T 2020[38]      | probiotic                                                                                                                                                                                         | NP                                          | All RCTs | adults who received mechanical ventilation (MV) therapy in hospitals | Vs. control                                                                                                                             | RR  | fixed  | 0.273 |  |
| length of ICU stay                                                                                             | -1.42 (-2.52 to -0.31) | 15 | 1895 | 90.7 |                    |                                                                                                                                                                                                   |                                             |          |                                                                      |                                                                                                                                         | WMD | random | 0.891 |  |
| length of hospital stay                                                                                        | -1.79 (-3.89 to -0.31) | 8  | 1161 | 86.3 |                    |                                                                                                                                                                                                   |                                             |          |                                                                      |                                                                                                                                         | WMD |        | NA    |  |
| mortality rates                                                                                                | 0.83 (0.70 to 1.02)*   | 15 | 1959 | 0.0  |                    |                                                                                                                                                                                                   |                                             |          |                                                                      |                                                                                                                                         | RR  |        | 0.301 |  |





|                                                      |                        |   |      |      |                   |                                                                                                |                                                                                          |          |                                                                                                                                                                                                                                 |                                                                                   |     |        |                 |  |  |
|------------------------------------------------------|------------------------|---|------|------|-------------------|------------------------------------------------------------------------------------------------|------------------------------------------------------------------------------------------|----------|---------------------------------------------------------------------------------------------------------------------------------------------------------------------------------------------------------------------------------|-----------------------------------------------------------------------------------|-----|--------|-----------------|--|--|
| score derived from other subjective ratings scales   | 0.08 (-0.14 to 0.30)*  | 8 | 549  | 36.0 |                   | capsules/tablets, fermented milk, yoghurt, powder sachets)                                     |                                                                                          |          |                                                                                                                                                                                                                                 |                                                                                   |     | SMD    |                 |  |  |
| EDSS scores                                          | -1.22 (-2.40 to -0.03) | 3 | 173  | 92.0 | JIANG J 2021[42]  | probiotic                                                                                      | NP                                                                                       | All RCTs | Adult human participants with ages between 18 and 55 with clinically definite relapsing-remitting multiple sclerosis (RRMS), diagnosed according to McDonald criteria and an expanded disability status scale (EDSS) score ≤4.5 | probiotics vs. placebos                                                           | SMD | random | NP              |  |  |
| BDI total scores                                     | -1.58 (-3.03 to -0.12) | 3 | 173  | 94.0 |                   |                                                                                                |                                                                                          |          |                                                                                                                                                                                                                                 |                                                                                   |     |        |                 |  |  |
| GHQ scores                                           | -0.71 (-1.02 to -0.40) | 3 | 173  | 0.0  |                   |                                                                                                |                                                                                          |          |                                                                                                                                                                                                                                 |                                                                                   |     |        |                 |  |  |
| Physical Growth During the First Year of Life        | 1.07 (0.14 to 1.99) g  | 4 | 436  | 0.0  | RAO S 2009[43]    | combination of prebiotics and probiotics vs controls                                           | NP                                                                                       | All RCTs | full-term neonates                                                                                                                                                                                                              | formula had different composition vs. the control formula (apart from prebiotics) | WMD | fixed  | No serious bias |  |  |
| Incidence of infections requiring antibiotic therapy | 0.68 (0.61 to 0.77)    | 3 | 1122 | 0.0  | LOHNER S 2014[44] | prebiotics (prebiotics added to food in the manufacturing process or as a separate supplement) | a supplementation time of at least 2 months and an observation time of at least 4 months | All RCTs | healthy infants or children, aged 0–18 years                                                                                                                                                                                    | Vs. control (placebo or no supplementation)                                       | RR  | random | NP              |  |  |
| QoL, quality of life                                 | 0.06 (-0.14 to 0.25)   | 4 | 322  | 0.0  | WILSON B 2019[45] | prebiotics                                                                                     | 2-12 weeks                                                                               | All RCTs | Adult patients ≥18 and ≤64 y with Irritable bowel syndrome (IBS) or other Functional bowel                                                                                                                                      | vs. placebo                                                                       | SMD | random | No serious bias |  |  |

| Disorders (FBDs)                                          |                            |    |      |      |                     |     |                                                                                                                              |                     |                                               |                                                                                                         |                                                                    |            |        |      |
|-----------------------------------------------------------|----------------------------|----|------|------|---------------------|-----|------------------------------------------------------------------------------------------------------------------------------|---------------------|-----------------------------------------------|---------------------------------------------------------------------------------------------------------|--------------------------------------------------------------------|------------|--------|------|
| Effects on sepsis                                         | 0.64 (0.51 to 0.78)        | 11 | 1106 | 0.0  | CHI C 2019[46]      | E   | prebiotics                                                                                                                   | 7-57 days           | All RCTs                                      | low birth weight infants (<2500 g) or preterm infants (<36 weeks)                                       | vs. placebo                                                        | RR         | random | 0.80 |
| length of hospital stay                                   | -5.18 (-8.94 to -1.41)     | 8  | 733  | 83.0 |                     |     |                                                                                                                              |                     |                                               |                                                                                                         |                                                                    |            |        | 0.08 |
| BMI                                                       | -0.49 (-0.86 to -0.13)     | 4  | NP   | 41.3 | STACHOWSKA 2020[47] |     | treatment with prebiotic (soluble fiber or insoluble fiber) in the form of a supplement, e.g., pills, powder, etc.           | NP                  | All RCTs                                      | patients with confirmed non-alcoholic steatohepatitis (NASH)                                            | Vs. control                                                        | SMD        | random | 0.83 |
| liver stiffness measurement (LSM)                         | -0.70 (-1.00 to -0.40) kpa | 4  | 235  | 93.4 | SHARPTON 2019[48]   | S R | interventions in any of the following 4 categories: antibiotics, probiotics, synbiotics, or fecal microbiota transplantation | NP                  | All RCTs                                      | patients with nonalcoholic fatty liver disease (NAFLD)                                                  | Vs. placebo, usual care, or no intervention in patients with NAFLD | WMD        | random | NP   |
| improvement in hepatic steatosis, as graded by ultrasound | 2.40 (1.50 to 3.84)        | 6  | 384  | 22.4 |                     |     |                                                                                                                              |                     |                                               |                                                                                                         |                                                                    | OR         |        |      |
| SCORAD values at 8 weeks                                  | -6.56 (-11.43 to -1.68)    | 6  | NP   | 77.1 | CHANG Y 2016[49]    |     | synbiotics                                                                                                                   | NP                  | All RCTs                                      | patients with atopic dermatitis (AD)                                                                    | Vs. control                                                        | WMD        | random | NP   |
| Quality of Life                                           | -0.14(-0.45 to 0.17)*      | 3  | 159  | 0.0  | ZHU H F 2020[50]    |     | treated with microecological preparations (probiotics, prebiotics, synbiotics, or a combination of two preparations)         | 15 days to 6months  | All RCTs                                      | obese adults (age ≥18 years) who had undergone bariatric surgery (a type of surgery was not restricted) | Vs. placebo or conventional treatment                              | SMD        | fixed  | NP   |
| Excess Weight Loss                                        | 0.45 (-0.16 to 1.05)*      | 4  | 154  | 68.0 |                     |     |                                                                                                                              |                     |                                               |                                                                                                         |                                                                    |            | random |      |
| Infection Rates                                           | 0.46 (0.31 to 0.67)        | 11 | 913  | 43.0 | KAHN J 2020[51]     |     | pro-/synbiotics perioperatively                                                                                              | NP                  | Randomized and non-randomized control studies | Patients accepted liver resection (LR) or liver transplantation (LT).                                   | vs. controls                                                       | RR         | random | NP   |
| the number of participants who experienced ≥1             | 0.84 (0.73 to 0.96)        | 9  | 2845 | 43.8 | CHAN C K Y 2020[52] |     | Synbiotics were all administered through oral ingestion and                                                                  | 7 days to 12 months | randomized controlled trials (RCTs) and       | individuals of any age (including full-term                                                             | Vs. without Synbiotics                                             | Rate ratio | random | 0.20 |

[illegible]

|                                                               |    |                       |   |         |     |                 |                     |            |          |                                                    |                                                |    |        |     |  |      |
|---------------------------------------------------------------|----|-----------------------|---|---------|-----|-----------------|---------------------|------------|----------|----------------------------------------------------|------------------------------------------------|----|--------|-----|--|------|
|                                                               |    | to1.16)               |   |         |     |                 |                     |            |          |                                                    |                                                |    |        |     |  |      |
| Length of Hospital Stay                                       | of | -0.07(-0.55 to 0.42)  | 7 |         |     |                 |                     | synbiotic  |          |                                                    |                                                |    |        | WMD |  | 0.15 |
| Length of Antibiotic Treatment                                | of | -1.71(-3.2 to -0.21)  | 4 |         |     |                 |                     | synbiotic  |          |                                                    |                                                |    |        |     |  | 0.02 |
| Effect of probiotics on development of overt HE (week 4)      | of | 0.22 (0.07 to 0.67)   | 3 | 95/191  | 0.0 | CAO Q 2018 [55] | Probiotic treatment | 4-12 weeks | All RCTs | Patients with Minimal hepatic encephalopathy (MHE) | Probiotic treatment vs placebo or no treatment | OR | random |     |  | NP   |
| Effect of probiotics on development of overt HE (week 12)     | of | 0.48 (0.21 to 1.12) * | 3 | 104/205 | 0.0 |                 |                     |            |          |                                                    |                                                |    |        |     |  |      |
| Improvement in Minimal hepatic encephalopathy (MHE) (week 12) | of | 0.15 (0.07 to 0.32)   | 3 | 104/205 | 0.0 |                 |                     |            |          |                                                    |                                                |    |        |     |  |      |

\* No statistical significance; CI, confidence interval; RCT, randomized controlled trial; RR, relative risk; HR, hazard ratio; MD, mean

difference; SMD, standard mean difference; WMD, weighted mean difference; OR, odds ratio; NA, not available; NP, not published.

## References

1. Goldenberg, J.Z.; Yap, C.; Lytvyn, L.; Lo, C.K.; Beardsley, J.; Mertz, D.; Johnston, B.C. Probiotics for the prevention of Clostridium difficile-associated diarrhea in adults and children. *Cochrane Db. Syst. Rev.* **2017**, *2017*, D6095, doi: 10.1002/14651858.CD006095.pub4.
2. Chen, X.; Hu, Y.; Yuan, X.; Yang, J.; Ka, L. Effect of early enteral nutrition combined with probiotics in patients with stroke: a meta-analysis of randomized controlled trials. *Eur. J. Clin. Nutr.* **2022**, *76*, 592-603, doi: 10.1038/s41430-021-00986-3.
3. Wang, Z.; Xin, S.; Ding, L.; Ding, W.; Hou, Y.; Liu, C.; Zhang, X. The Potential Role of Probiotics in Controlling Overweight/Obesity and Associated Metabolic Parameters in Adults: A Systematic Review and Meta-Analysis. *Evid.-Based Compl. Alt.* **2019**, *2019*, 1-14, doi: 10.1155/2019/3862971.

4. Suzumura, E.A.; Bersch-Ferreira, Â.C.; Torreglosa, C.R.; Da Silva, J.T.; Coqueiro, A.Y.; Kuntz, M.G.F.; Chrispim, P.P.; Weber, B.; Cavalcanti, A.B. Effects of oral supplementation with probiotics or synbiotics in overweight and obese adults: a systematic review and meta-analyses of randomized trials. *Nutr. Rev.* **2019**, *77*, 430-450, doi: 10.1093/nutrit/nuz001.
5. Mohammadi, H.; Ghavami, A.; Faghihimani, Z.; Sharifi, S.; Nattagh-Eshtivani, E.; Ziaei, R.; Miraghajani, M. Effects of probiotics fermented milk products on obesity measure among adults: A systematic review and meta-analysis of clinical trials. *J. Funct. Foods* **2021**, *82*, 104494, doi: 10.1016/j.jff.2021.104494.
6. Hadi, A.; Ghaedi, E.; Khalesi, S.; Pourmasoumi, M.; Arab, A. Effects of synbiotic consumption on lipid profile: a systematic review and meta-analysis of randomized controlled clinical trials. *Eur. J. Nutr.* **2020**, *59*, 2857-2874, doi: 10.1007/s00394-020-02248-7.
7. Pontes, K.S.D.S.; Guedes, M.R.; Cunha, M.R.D.; Mattos, S.D.S.; Barreto Silva, M.I.; Neves, M.F.; Marques, B.C.A.A.; Klein, M.R.S.T. Effects of probiotics on body adiposity and cardiovascular risk markers in individuals with overweight and obesity: A systematic review and meta-analysis of randomized controlled trials. *Clin. Nutr.* **2021**, *40*, 4915-4931, doi: 10.1016/j.clnu.2021.06.023.
8. Zhang, G.; Hu, H.; Liu, C.; Zhang, Q.; Shakya, S.; Li, Z. Probiotics for Prevention of Atopy and Food Hypersensitivity in Early Childhood. *Medicine* **2016**, *95*, e2562, doi: 10.1097/MD.0000000000002562.
9. Coffey, M.J.; Garg, M.; Homaira, N.; Jaffe, A.; Ooi, C.Y. Probiotics for people with cystic fibrosis. *Cochrane Db. Syst. Rev.* **2020**, doi: 10.1002/14651858.CD012949.pub2.
10. Cozzolino, M.; Vitagliano, A.; Pellegrini, L.; Chiurazzi, M.; Andriasani, A.; Ambrosini, G.; Garrido, N. Therapy with probiotics and synbiotics for polycystic ovarian syndrome: a systematic review and meta-analysis. *Eur. J. Nutr.* **2020**, *59*, 2841-2856, doi: 10.1007/s00394-020-02233-0.
11. Li, Y.; Tan, Y.; Xia, G.; Shuai, J. Effects of probiotics, prebiotics, and synbiotics on polycystic ovary syndrome: a systematic review and meta-analysis. *Crit. Rev. Food Sci.* **2021**, 1-17, doi: 10.1080/10408398.2021.1951155.
12. Miller, L.; Lehtoranta, L.; Lehtinen, M. The Effect of Bifidobacterium animalis ssp. lactis HN019 on Cellular Immune Function in Healthy Elderly Subjects: Systematic Review and Meta-Analysis. *Nutrients* **2017**, *9*, 191, doi: 10.3390/nu9030191.
13. Miller, L.E.; Lehtoranta, L.; Lehtinen, M.J. Short-term probiotic supplementation enhances cellular immune function in healthy elderly: systematic review and meta-analysis of controlled studies. *Nutr. Res.* **2019**, *64*, 1-8, doi: 10.1016/j.nutres.2018.12.011.
14. Dalal, R.; Mcgee, R.G.; Riordan, S.M.; Webster, A.C. Probiotics for people with hepatic encephalopathy. *Cochrane Db. Syst. Rev.* **2021**, 2021, doi: 10.1002/14651858.CD008716.pub3.
15. Dermyshe, E.; Wang, Y.; Yan, C.; Hong, W.; Qiu, G.; Gong, X.; Zhang, T. The “Golden Age” of Probiotics: A Systematic Review and Meta-Analysis of Randomized and Observational Studies in Preterm Infants. *Neonatology* **2017**, *112*, 9-23, doi: 10.1159/000454668.
16. Aceti, A.; Maggio, L.; Beghetti, I.; Gori, D.; Barone, G.; Callegari, M.; Fantini, M.; Indrio, F.; Meneghin, F.; Morelli, L.; et al. Probiotics Prevent Late-Onset Sepsis in Human Milk-Fed, Very Low Birth Weight Preterm Infants: Systematic Review and Meta-Analysis. *Nutrients* **2017**, *9*, 904, doi: 10.3390/nu9080904.
17. Loman, B.R.; Hernández-Saavedra, D.; An, R.; Rector, R.S. Prebiotic and probiotic treatment of nonalcoholic fatty liver disease: a systematic review and meta-analysis. *Nutr. Rev.* **2018**, *76*, 822-839, doi: 10.1093/nutrit/nuy031.
18. Khan, M.Y.; Mihali, A.B.; Rawala, M.S.; Aslam, A.; Siddiqui, W.J. The promising role of probiotic and synbiotic therapy in aminotransferase levels and inflammatory markers in patients with nonalcoholic fatty liver disease – a systematic review and meta-analysis. *Eur. J. Gastroen. Hepat.* **2019**, *31*, 703-715, doi: 10.1097/MEG.0000000000001371.

19. Sawas, T.; Al Halabi, S.; Hernaez, R.; Carey, W.D.; Cho, W.K. Patients Receiving Prebiotics and Probiotics Before Liver Transplantation Develop Fewer Infections Than Controls: A Systematic Review and Meta-Analysis. *Clin. Gastroenterol. H.* **2015**, *13*, 1567-1574, doi: 10.1016/j.cgh.2015.05.027.
20. Yang, Z.; Wu, Q.; Liu, Y.; Fan, D. Effect of Perioperative Probiotics and Synbiotics on Postoperative Infections After Gastrointestinal Surgery: A Systematic Review With Meta-Analysis. *Jpen.-Parenter. Enter.* **2017**, *41*, 1051-1062, doi: 10.1177/0148607116629670.
21. Wu, X.; Xu, W.; Liu, M.; Hu, K.; Sun, Y.; Yang, X.; Zhu, G.; Wang, Z.; Huang, W. Efficacy of prophylactic probiotics in combination with antibiotics versus antibiotics alone for colorectal surgery: A meta-analysis of randomized controlled trials. *J. Surg. Oncol.* **2018**, *117*, 1394-1404, doi: 10.1002/jso.25038.
22. Skonieczna-żydecka, K.; Kaczmarczyk, M.; łoniewski, I.; Lara, L.; Koulaouzidis, A.; Misera, A.; Maciejewska, D.; Marlicz, W. A Systematic Review, Meta-Analysis, and Meta-Regression Evaluating the Efficacy and Mechanisms of Action of Probiotics and Synbiotics in the Prevention of Surgical Site Infections and Surgery-Related Complications. *Journal of Clinical Medicine* **2018**, *7*, 556, doi: 10.3390/jcm7120556.
23. Zhong, C.; Qu, C.; Wang, B.; Liang, S.; Zeng, B. Probiotics for Preventing and Treating Small Intestinal Bacterial Overgrowth. *J. Clin. Gastroenterol.* **2017**, *51*, 300-311, doi: 10.1097/MCG.0000000000000814.
24. Pan, H.; Li, R.; Li, T.; Wang, J.; Liu, L. Whether Probiotic Supplementation Benefits Rheumatoid Arthritis Patients: A Systematic Review and Meta-Analysis. *Engineering* **2017**, *3*, 115-121, doi: 10.1016/J.ENG.2017.01.006.
25. Le Morvan De Sequeira, C.; Kaeber, M.; Cekin, S.E.; Enck, P.; Mack, I. The Effect of Probiotics on Quality of Life, Depression and Anxiety in Patients with Irritable Bowel Syndrome: A Systematic Review and Meta-Analysis. *Journal of Clinical Medicine* **2021**, *10*, 3497, doi: 10.3390/jcm10163497.
26. Lei, W.; Shih, P.; Liu, S.; Lin, C.; Yeh, T. Effect of Probiotics and Prebiotics on Immune Response to Influenza Vaccination in Adults: A Systematic Review and Meta-Analysis of Randomized Controlled Trials. *Nutrients* **2017**, *9*, 1175, doi: 10.3390/nu9111175.
27. Yeh, T.; Shih, P.; Liu, S.; Lin, C.; Liu, J.; Lei, W.; Lin, C. The influence of prebiotic or probiotic supplementation on antibody titers after influenza vaccination: a systematic review and meta-analysis of randomized controlled trials. *Drug Des. Dev. Ther.* **2018**, *Volume 12*, 217-230, doi: 10.2147/DDDT.S155110.
28. Tao, S.B.; Tao, S.Y.; Cheng, Y.M.; Liu, J.; Ma, L.; Fu, P. Effects of probiotic supplements on the progression of chronic kidney disease: A meta-analysis. *Nephrology* **2019**, *24*, 1122-1130, doi: 10.1111/nep.13549.
29. Bakhtiary, M.; Morvaridzadeh, M.; Agah, S.; Rahimlou, M.; Christopher, E.; Zadro, J.R.; Heshmati, J. Effect of Probiotic, Prebiotic, and Synbiotic Supplementation on Cardiometabolic and Oxidative Stress Parameters in Patients With Chronic Kidney Disease: A Systematic Review and Meta-analysis. *Clin. Ther.* **2021**, *43*, e71-e96, doi: 10.1016/j.clinthera.2020.12.021.
30. Mcfarlane, C.; Ramos, C.I.; Johnson, D.W.; Campbell, K.L. Prebiotic, Probiotic, and Synbiotic Supplementation in Chronic Kidney Disease: A Systematic Review and Meta-analysis. *J. Renal Nutr.* **2019**, *29*, 209-220, doi: 10.1053/j.jrn.2018.08.008.
31. Bock, P.M.; Telo, G.H.; Ramalho, R.; Sbaraini, M.; Leivas, G.; Martins, A.F.; Schaan, B.D. The effect of probiotics, prebiotics or synbiotics on metabolic outcomes in individuals with diabetes: a systematic review and meta-analysis. *Diabetologia* **2021**, *64*, 26-41, doi: 10.1007/s00125-020-05295-1.
32. Hendijani, F.; Akbari, V. Probiotic supplementation for management of cardiovascular risk factors in adults with type II diabetes: A systematic review and meta-analysis. *Clin. Nutr.* **2018**, *37*, 532-541, doi: 10.1016/j.clnu.2017.02.015.
33. Du, X.; Wang, L.; Wu, S.; Yuan, L.; Tang, S.; Xiang, Y.; Qu, X.; Liu, H.; Qin, X.; Liu, C. Efficacy of probiotic supplementary therapy for asthma, allergic rhinitis, and wheeze: a meta-analysis of randomized controlled trials. *Allergy Asthma Proc.* **2019**, *40*, 250-260, doi: 10.2500/aap.2019.40.4227.

34. Chi, C.; Li, C.; Wu, D.; Buys, N.; Wang, W.; Fan, H.; Sun, J. Effects of Probiotics on Patients with Hypertension: a Systematic Review and Meta-Analysis. *Curr. Hypertens. Rep.* **2020**, *22*, doi: 10.1007/s11906-020-01042-4.
35. Hadi, A.; Arab, A.; Khalesi, S.; Rafie, N.; Kafeshani, M.; Kazemi, M. Effects of probiotic supplementation on anthropometric and metabolic characteristics in adults with metabolic syndrome: A systematic review and meta-analysis of randomized clinical trials. *Clin. Nutr.* **2021**, *40*, 4662-4673, doi: 10.1016/j.clnu.2021.05.027.
36. Sun, S.; Chang, G.; Zhang, L. The prevention effect of probiotics against eczema in children: an update systematic review and meta-analysis. *J. Dermatol. Treat.* **2021**, 1-11, doi: 10.1080/09546634.2021.1925077.
37. Boyle, R.J.; Bath-Hextall, F.J.; Leonardi-Bee, J.; Murrell, D.F.; Tang, M.L. Probiotics for the treatment of eczema: a systematic review. *Clinical & Experimental Allergy* **2009**, *39*, 1117-1127, doi: 10.1111/j.1365-2222.2009.03305.x.
38. Ji, T.; Zhu, X.; Shang, F.; Zhang, X. Preventive Effect of Probiotics on Ventilator-Associated Pneumonia: A Meta-analysis of 2428 Patients. *Ann. Pharmacother.* **2021**, *55*, 949-962, doi: 10.1177/1060028020983021.
39. Wang, F.; Pan, B.; Xu, S.; Xu, Z.; Zhang, T.; Zhang, Q.; Bao, Y.; Wang, Y.; Zhang, J.; Xu, C.; et al. A meta-analysis reveals the effectiveness of probiotics and prebiotics against respiratory viral infection. *Bioscience Rep.* **2021**, *41*, R20203638, doi: 10.1042/BSR20203638.
40. Wang, Y.; Li, X.; Ge, T.; Xiao, Y.; Liao, Y.; Cui, Y.; Zhang, Y.; Ho, W.; Yu, G.; Zhang, T. Probiotics for prevention and treatment of respiratory tract infections in children. *Medicine* **2016**, *95*, e4509, doi: 10.1097/MD.0000000000004509.
41. Irwin, C.; McCartney, D.; Ben, D.; Khalesi, S. Effects of probiotics and paraprobiotics on subjective and objective sleep metrics: a systematic review and meta-analysis. *Eur. J. Clin. Nutr.* **2020**, *74*, 1536-1549, doi: 10.1038/s41430-020-0656-x.
42. Jiang, J.; Chu, C.; Wu, C.; Wang, C.; Zhang, C.; Li, T.; Zhai, Q.; Yu, L.; Tian, F.; Chen, W. Efficacy of probiotics in multiple sclerosis: a systematic review of preclinical trials and meta-analysis of randomized controlled trials. *Food Funct.* **2021**, *12*, 2354-2377, doi: 10.1039/D0FO03203D.
43. Rao, S.; Srinivasjois, R.; Patole, S. Prebiotic Supplementation in Full-term Neonates. *Archives of Pediatrics & Adolescent Medicine* **2009**, *163*, 755-764, doi: 10.1001/archpediatrics.2009.94.
44. Lohner, S.; Küllenberg, D.; Antes, G.; Decsi, T.; Meerpohl, J.J. Prebiotics in healthy infants and children for prevention of acute infectious diseases: a systematic review and meta-analysis. *Nutr. Rev.* **2014**, *72*, 523-531, doi: 10.1111/nure.12117.
45. Wilson, B.; Rossi, M.; Dimidi, E.; Whelan, K. Prebiotics in irritable bowel syndrome and other functional bowel disorders in adults: a systematic review and meta-analysis of randomized controlled trials. *The American Journal of Clinical Nutrition* **2019**, *109*, 1098-1111, doi: 10.1093/ajcn/nqy376.
46. Chi, C.; Buys, N.; Li, C.; Sun, J.; Yin, C. Effects of prebiotics on sepsis, necrotizing enterocolitis, mortality, feeding intolerance, time to full enteral feeding, length of hospital stay, and stool frequency in preterm infants: a meta-analysis. *Eur. J. Clin. Nutr.* **2019**, *73*, 657-670, doi: 10.1038/s41430-018-0377-6.
47. Stachowska, E.; Portincasa, P.; Jamioł-Milc, D.; Maciejewska-Markiewicz, D.; Skonieczna-żydecka, K. The Relationship between Prebiotic Supplementation and Anthropometric and Biochemical Parameters in Patients with NAFLD—A Systematic Review and Meta-Analysis of Randomized Controlled Trials. *Nutrients* **2020**, *12*, 3460, doi: 10.3390/nu12113460.
48. Sharpton, S.R.; Maraj, B.; Harding-Theobald, E.; Vittinghoff, E.; Terrault, N.A. Gut microbiome-targeted therapies in nonalcoholic fatty liver disease: a systematic review, meta-analysis, and meta-regression. *The American Journal of Clinical Nutrition* **2019**, *110*, 139-149, doi: 10.1093/ajcn/nqz042.
49. Chang, Y.; Trivedi, M.K.; Jha, A.; Lin, Y.; Dimaano, L.; García-Romero, M.T. Synbiotics for Prevention and Treatment of Atopic Dermatitis. *JAMA Pediatr.* **2016**, *170*, 236, doi: 10.1001/jamapediatrics.2015.3943.

50. Zhu, H.; Ren, Z.; Zang, Y.; Hua, H.; Lu, J.; Xu, Q.; Zhu, S. Effects of Microecological Preparations on Obese Patients after Bariatric Surgery: A Systematic Review and Meta-Analysis. *Evid.-Based Compl. Alt.* **2020**, 2020, 1-10, doi: 10.1155/2020/8724546.
51. Kahn, J.; Pregartner, G.; Schemmer, P. Effects of both Pro- and Synbiotics in Liver Surgery and Transplantation with Special Focus on the Gut–Liver Axis—A Systematic Review and Meta-Analysis. *Nutrients* **2020**, 12, 2461, doi: 10.3390/nu12082461.
52. Chan, C.K.Y.; Tao, J.; Chan, O.S.; Li, H.; Pang, H. Preventing Respiratory Tract Infections by Synbiotic Interventions: A Systematic Review and Meta-Analysis of Randomized Controlled Trials. *Adv. Nutr.* **2020**, 11, 979-988, doi: 10.1093/advances/nmaa003.
53. Sorensen, K.; Cawood, A.L.; Gibson, G.R.; Cooke, L.H.; Stratton, R.J. Amino Acid Formula Containing Synbiotics in Infants with Cow's Milk Protein Allergy: A Systematic Review and Meta-Analysis. *Nutrients* **2021**, 13, 935, doi: 10.3390/nu13030935.
54. Kinross, J.M.; Markar, S.; Karthikesalingam, A.; Chow, A.; Penney, N.; Silk, D.; Darzi, A. A Meta-Analysis of Probiotic and Synbiotic Use in Elective Surgery. *Jpen.-Parenter. Enter.* **2013**, 37, 243-253, doi: 10.1177/0148607112452306.
55. Cao, Q.; Yu, C.; Yang, S.; Cao, H.; Chen, P.; Deng, M.; Li, L. Effect of probiotic treatment on cirrhotic patients with minimal hepatic encephalopathy: A meta-analysis. *Hepatob. Pancreat. Dis.* **2018**, 17, 9-16, doi: 10.1016/j.hbpd.2018.01.005.
