# Supplementary material for: Gastrointestinal Microbiome and Multiple Health Outcomes: Umbrella Review
Source: MDPI journal article supplement (doi:10.3390/nu14183726), 2022-09-09
Supplement: s1 [file s1]

Supplement Table S10. Other interventions and multiple health outcomes.

| outcome(s) of interest                                            |  |  | estimated summary effect (95% CI) | number of studies / total studies | number of intervention group or total participants | Heterogeneity (I <sup>2</sup> , %) | the author year + first of publication | Intervention                                                                                                                                                   | Duration of Intervention/follow-up | study design                                                          | populations                                                | outcome comparison                                                                                                        | meta-analysis metric | type of effect model | publication bias | 1.  |  |  |  |  |  |  |
|-------------------------------------------------------------------|--|--|-----------------------------------|-----------------------------------|----------------------------------------------------|------------------------------------|----------------------------------------|----------------------------------------------------------------------------------------------------------------------------------------------------------------|------------------------------------|-----------------------------------------------------------------------|------------------------------------------------------------|---------------------------------------------------------------------------------------------------------------------------|----------------------|----------------------|------------------|-----|--|--|--|--|--|--|
| improvement of rosacea-related symptoms                           |  |  | 1.28 (0.98 to 1.67)*              | 7                                 | NP                                                 | NP                                 | JORGENSEN A 2017[1]                    | treatment of Helicobacter pylori infection                                                                                                                     | NP                                 | Case-control , cross-sectional, cohort, or nested case-control design | rosacea patients                                           | rosacea patients with control groups.                                                                                     | OR                   | random               | NP               | 2.  |  |  |  |  |  |  |
| fasting blood glucose (FPG)                                       |  |  | -0.87 (-1.26 to -0.49)            | 4                                 | 348                                                | 75.0                               | ZHENG Y 2021[2]                        | Chinese herbal compounds, Chinese patent medicine, and single Chinese medical herbs, which can be administered in the form of decoctions, granules, or powders | 8-12 weeks                         | All RCTs                                                              | human                                                      | Vs. individuals that were treated with either Western medicine or placebo, or those that did not undergo any intervention | MD                   | random               | NP               | 3.  |  |  |  |  |  |  |
| HbA1c                                                             |  |  | -0.69 (-1.24 to -0.14) %          | 4                                 | 253                                                | 86.0                               |                                        |                                                                                                                                                                |                                    |                                                                       |                                                            |                                                                                                                           |                      |                      |                  | 4.  |  |  |  |  |  |  |
| 2-h postprandial blood glucose (2hPG)                             |  |  | -0.83 (-1.01 to -0.65)            | 3                                 | 253                                                | 0.0                                |                                        |                                                                                                                                                                |                                    |                                                                       |                                                            |                                                                                                                           |                      |                      |                  | 5.  |  |  |  |  |  |  |
| HOMA-IR                                                           |  |  | -0.99 (-1.25 to -0.73)            | 3                                 | 263                                                | 0.0                                |                                        |                                                                                                                                                                |                                    |                                                                       |                                                            |                                                                                                                           | SMD                  | fixed                |                  | 6.  |  |  |  |  |  |  |
| risk of UC                                                        |  |  | 1.09 (0.88 to 1.34)*              | 7                                 | NP                                                 | 0.0                                | MILAJERDIA 2021[3]                     | dietary fiber consumption                                                                                                                                      | NP                                 | prospective cohort or nested case-control studies                     | Human excluded pregnant women, children, or elderly people | Vs. without dietary fiber                                                                                                 | RR                   | fixed                | NP               | 7.  |  |  |  |  |  |  |
| risk of CD                                                        |  |  | 0.59 (0.46 to 0.74)               | 6                                 |                                                    | 0.0                                |                                        |                                                                                                                                                                |                                    |                                                                       |                                                            |                                                                                                                           |                      |                      |                  | 8.  |  |  |  |  |  |  |
| risk of UC                                                        |  |  | 0.69 (0.55 to 0.86)               | 4                                 |                                                    | 87.0                               |                                        | Fruit consumption                                                                                                                                              |                                    |                                                                       |                                                            | those in the highest category of fruit intake vs. those in the lowest category                                            |                      |                      |                  | 9.  |  |  |  |  |  |  |
| risk of CD                                                        |  |  | 0.47 (0.38 to 0.58)               | 4                                 |                                                    | 32.1                               |                                        |                                                                                                                                                                |                                    |                                                                       |                                                            |                                                                                                                           |                      |                      |                  | 10. |  |  |  |  |  |  |
| risk of UC                                                        |  |  | 0.56 (0.48 to 0.66)               | 3                                 |                                                    | 72.0                               |                                        | vegetable consumption                                                                                                                                          |                                    |                                                                       |                                                            | individuals in the top category of vegetable consumption vs. those in the bottom category                                 |                      |                      |                  | 11. |  |  |  |  |  |  |
| risk of CD                                                        |  |  | 0.52 (0.46 to 0.59)               | 3                                 |                                                    | 78.9                               |                                        |                                                                                                                                                                |                                    |                                                                       |                                                            |                                                                                                                           |                      |                      |                  | 12. |  |  |  |  |  |  |
| the incidence of Gastrointestinal acute graft-versus-host-disease |  |  | 0.69 (0.56 to 0.86)               | 7                                 | 495                                                | 0.0                                | ZAMA 2021[4]                           | Enteral nutrition (EN) with or without the addition of parenteral                                                                                              | NP                                 | experimental and observational                                        | Human with allogeneic                                      | Vs. only PN                                                                                                               | RR                   | fixed                | NP               | 13. |  |  |  |  |  |  |

|                                                    |                           |    |       |      |                     |                                                                            |                    |                  |      |      |                                          |                                                                                  |                                                     |     |        |        |       |     |
|----------------------------------------------------|---------------------------|----|-------|------|---------------------|----------------------------------------------------------------------------|--------------------|------------------|------|------|------------------------------------------|----------------------------------------------------------------------------------|-----------------------------------------------------|-----|--------|--------|-------|-----|
| (aGvHD),                                           |                           |    |       |      |                     |                                                                            |                    | nutrition group) | (PN) | (EN) | l                                        | original studies                                                                 | hematopoietic stem cell transplantation (allo-HSCT) |     |        |        |       |     |
| The incidence of aGvHD grade III-IV                | 0.44 (0.30 to 0.64)       | 5  | 522   | 0.0  |                     |                                                                            |                    |                  |      |      |                                          |                                                                                  |                                                     |     |        |        |       | 14. |
| Gut aGvHD                                          | 0.44 (0.30 to 0.66)       | 4  | 396   | 6.0  |                     |                                                                            |                    |                  |      |      |                                          |                                                                                  |                                                     |     |        |        |       | 15. |
| the incidence of mucositis grade III-IV            | 0.95 (0.83 to 1.09)*      | 5  | 530   | 0.0  |                     |                                                                            |                    |                  |      |      |                                          |                                                                                  |                                                     |     |        |        |       | 16. |
| overall survival at day +100                       | 1.07 (0.95 to 1.21)*      | 5  | 530   | 63.0 |                     |                                                                            |                    |                  |      |      |                                          |                                                                                  |                                                     |     | random |        |       | 17. |
| blood urea nitrogen (BUN)                          | -6.91 (-11.87 to -1.95)   | 4  | 148   | 0.0  | JIA L 2021[5]       | resistant starch type 2                                                    | NP                 |                  |      |      | RCTs regardless of a design of blindness | adult CKD patients receiving regular hemodialysis                                | With Without resistant starch type 2                | vs. | WMD    | random | NP    | 18. |
| serum creatinine (Scr)                             | -7.43 (-11.99 to -2.86)   | 3  | 119   | 44.0 |                     |                                                                            |                    |                  |      |      |                                          |                                                                                  |                                                     |     |        |        |       | 19. |
| uric acid (UA)                                     | 0.17 (-0.23 to 0.58)*     | 3  | 108   | 0.0  |                     |                                                                            |                    |                  |      |      |                                          |                                                                                  |                                                     |     |        |        |       | 20. |
| indoxyl sulfate (IS)                               | -0.33 (-0.70 to 0.04)*    | 3  | 115   | 0.0  |                     |                                                                            |                    |                  |      |      |                                          |                                                                                  |                                                     |     | SMD    |        |       | 21. |
| p-cresyl sulfate (PCS) in serum and plasma         | -0.31 (-0.68 to 0.06)*    | 3  | 115   | 0.0  |                     |                                                                            |                    |                  |      |      |                                          |                                                                                  |                                                     |     |        |        |       | 22. |
| interleukin (IL)-6                                 | -1.08 (-1.64 to -0.53)    | 3  | 95    | 35.0 |                     |                                                                            |                    |                  |      |      |                                          |                                                                                  |                                                     |     |        |        |       | 23. |
| high sensitive C-reaction protein (hsCRP) in serum | 0.17(-0.22 to 0.56)*      | 3  | 95    | 14.0 |                     |                                                                            |                    |                  |      |      |                                          |                                                                                  |                                                     |     |        |        |       | 24. |
| albumin in serum                                   | 0.06 (-0.06 to 0.18)*     | 4  | 159   | 0.0  |                     |                                                                            |                    |                  |      |      |                                          |                                                                                  |                                                     |     | WMD    |        |       | 25. |
| phosphorus in serum                                | -0.03 (-0.36 to 0.30)*    | 5  | 179   | 0.0  |                     |                                                                            |                    |                  |      |      |                                          |                                                                                  |                                                     |     | WMD    |        |       | 26. |
| IBS severity                                       | -0.66 (-0.88 to -0.44)    | 12 | 772   | 54.0 | van LANEN A 2021[6] | low-FODMAP (fermentable oligo-, di- and monosaccharides, and polyols) diet | 4 days to 3 months |                  |      |      | Intervention and observational studies   | adult human subjects with IBS diagnosed according to the Rome III or IV criteria | Vs. control diet                                    |     | SMD    | random | 0.087 | 27. |
| IBS Severity Scoring System (IBS-SSS)              | -45.13 (-76.56 to -13.69) | 7  | 503   | 89.0 |                     |                                                                            |                    |                  |      |      |                                          |                                                                                  |                                                     |     | MD     |        | NP    | 28. |
| Quality of life                                    | 4.93 (1.77 to 8.08)       | 6  | 483   | 42.0 |                     |                                                                            |                    |                  |      |      |                                          |                                                                                  |                                                     |     |        |        |       | 29. |
| fasting blood sugar (FBS)                          | -10.28 (-16.53 to -4.02)  | 7  | 323   | 58.0 | SALARI 2021[7]      | A                                                                          | kefir beverage     | 15-84 days       |      |      | clinical trials                          | Type II diabetic patients                                                        | Vs. control beverages                               |     | MD     | random | NP    | 30. |
| HbA1c                                              | -0.64 (-1.36 to 0.08)*    | 4  | 271   | 97.0 |                     |                                                                            |                    |                  |      |      |                                          |                                                                                  |                                                     |     |        |        |       | 31. |
| insulin levels                                     | -2.87 (-3.96 to -1.78)    | 3  | 169   | 87.0 |                     |                                                                            |                    |                  |      |      |                                          |                                                                                  |                                                     |     |        | fixed  |       | 32. |
| depression                                         | 0.76 (0.64 to 0.90)       | 5  | 97023 | 43.9 | Fatahi 2021[8]      | S                                                                          | dietary fiber      | NP               |      |      | cross-sectional studies.                 | adults and children                                                              | higher fiber consumption vs.                        |     | OR     | random | 0.31  | 33. |

|                               |                           |   |     |      |                           |                                                                                                                                                                                                             |                    |          |                         |                                 |                                |    |        |    |     |
|-------------------------------|---------------------------|---|-----|------|---------------------------|-------------------------------------------------------------------------------------------------------------------------------------------------------------------------------------------------------------|--------------------|----------|-------------------------|---------------------------------|--------------------------------|----|--------|----|-----|
| duration of diarrhea episodes | -20.31 (-27.06 to -13.57) | 4 | 224 | 24.0 | MALAGON-ROJAS J N 2020[9] | Postbiotics (bioactive compounds produced during a fermentation process (including microbial cells, cell constituents and metabolites) that supports health and/or wellbeing): non-viable L. acidophilus LB | 4 days to 5 months | All RCTs | of all ages and genders | Lower dietary fiber consumption | Vs. placebo or no intervention | MD | random | NP | 34. |
|-------------------------------|---------------------------|---|-----|------|---------------------------|-------------------------------------------------------------------------------------------------------------------------------------------------------------------------------------------------------------|--------------------|----------|-------------------------|---------------------------------|--------------------------------|----|--------|----|-----|

\* No statistical significance; CI, confidence interval; RCT, randomized controlled trial; RR, relative risk; HR, hazard ratio; MD, mean

difference; SMD, standard mean difference; WMD, weighted mean difference; OR, odds ratio; NA, not available; NP, not published.

## References

1. Jørgensen, A.R.; Egeberg, A.; Gideonsson, R.; Weinstock, L.B.; Thyssen, E.P.; Thyssen, J.P. Rosacea is associated with *Helicobacter pylori*: a systematic review and meta-analysis. *J. Eur. Acad. Dermatol.* **2017**, *31*, 2010-2015, doi: 10.1111/jdv.14352.
2. Zheng, Y.; Ding, Q.; Wei, Y.; Gou, X.; Tian, J.; Li, M.; Tong, X. Effect of traditional Chinese medicine on gut microbiota in adults with type 2 diabetes: A systematic review and meta-analysis. *Phytomedicine* **2021**, *88*, 153455, doi: 10.1016/j.phymed.2020.153455.
3. Milajerdi, A.; Ebrahimi-Daryani, N.; Dieleman, L.A.; Larijani, B.; Esmailzadeh, A. Association of Dietary Fiber, Fruit, and Vegetable Consumption with Risk of Inflammatory Bowel Disease: A Systematic Review and Meta-Analysis. *Adv. Nutr.* **2021**, *12*, 735-743, doi: 10.1093/advances/nmaa145.
4. Zama, D.; Gori, D.; Muratore, E.; Leardini, D.; Rallo, F.; Turrone, S.; Prete, A.; Brigidi, P.; Pession, A.; Masetti, R. Enteral versus Parenteral Nutrition as Nutritional Support after Allogeneic Hematopoietic Stem Cell Transplantation: a Systematic Review and Meta-Analysis. *Transplantation and Cellular Therapy* **2021**, *27*, 180-181, doi: 10.1016/j.jtct.2020.11.006.
5. Jia, L.; Dong, X.; Li, X.; Jia, R.; Zhang, H. Benefits of resistant starch type 2 for patients with end-stage renal disease under maintenance hemodialysis: a systematic review and meta-analysis. *Int. J. Med. Sci.* **2021**, *18*, 811-820, doi: 10.7150/ijms.51484.
6. van Lanen, A.; de Bree, A.; Greyling, A. Efficacy of a low-FODMAP diet in adult irritable bowel syndrome: a systematic review and meta-analysis. *Eur. J. Nutr.* **2021**, *60*, 3505-3522, doi: 10.1007/s00394-020-02473-0.
7. Salari, A.; Ghodrati, S.; Gheflati, A.; Jarahi, L.; Hashemi, M.; Afshari, A. Effect of kefir beverage consumption on glycemic control: A systematic review and meta-analysis of randomized controlled clinical trials. *Complementary Therapies in Clinical Practice* **2021**, *44*, 101443, doi: 10.1016/j.ctcp.2021.101443.

8. Fatahi, S.; Matin, S.S.; Sohouli, M.H.; Găman, M.; Raei, P.; Olang, B.; Kathirgamathamby, V.; Santos, H.O.; Guimarães, N.S.; Shidfar, F. Association of dietary fiber and depression symptom: A systematic review and meta-analysis of observational studies. *Complement. Ther. Med.* **2021**, *56*, 102621, doi: 10.1016/j.ctim.2020.102621.
9. Malagón-Rojas, J.N.; Mantziari, A.; Salminen, S.; Szajewska, H. Postbiotics for Preventing and Treating Common Infectious Diseases in Children: A Systematic Review. *Nutrients* **2020**, *12*, 389, doi: 10.3390/nu12020389.
