# Supplementary material for: Gastrointestinal Microbiome and Multiple Health Outcomes: Umbrella Review
Source: MDPI journal article supplement (doi:10.3390/nu14183726), 2022-09-09
Supplement: s1 [file s1]

**Supplement Table S5.** Prebiotics/probiotics/synbiotics neurological and psychiatric outcomes.

| outcome(s) of interest                                                | estimated summary effect (95% CI) | number of studies / total studies | number of intervention group or total participants | Heterogeneity ( $I^2$ , %) | the first author + year of publication | Intervention                                                                                                                                                                     | Duration of Intervention/follow-up | study design | populations                                                                           | outcome comparison                                                                  | meta-analysis metric | type of effect model | publication bias |
|-----------------------------------------------------------------------|-----------------------------------|-----------------------------------|----------------------------------------------------|----------------------------|----------------------------------------|----------------------------------------------------------------------------------------------------------------------------------------------------------------------------------|------------------------------------|--------------|---------------------------------------------------------------------------------------|-------------------------------------------------------------------------------------|----------------------|----------------------|------------------|
| effect of probiotics on cognition                                     | 0.24 (0.05 to 0.42)               | 7                                 | NP                                                 | 0.0                        | LV T 2021[1]                           | probiotics intervention (any dose, strain, or administration method)                                                                                                             | 8-12 weeks                         | All RCTs     | adults age $\geq 18$ years                                                            | probiotics intervention (any dose, strain, or administration method) versus control | SMD                  | Random               | NP               |
| cognitive function in individuals with Alzheimer's disease            | 0.56 (-0.06 to 1.18)*             | 3                                 | 82/161                                             | 73.0                       | KRÜGER J F 2021[2]                     | Probiotic or synbiotic, orally or enterally administered, with no restriction on strains, doses, and frequency and duration of administration, provided information was reported | NP                                 | All RCTs     | individuals with dementia who underwent an intervention with probiotics or synbiotics | probiotics or synbiotics intervention versus control or placebo group               | SMD                  | Random               | NP               |
| cognitive enhancement                                                 | 0.37 (0.14 to 0.61)               | 5                                 | 154/297                                            | 24.0                       | DENG H Y 2020 [3]                      | Probiotic                                                                                                                                                                        | 12 weeks                           | All RCTs     | Adult human participants who had a diagnosis of AD or MCI (aged over 18 y)            | Probiotics versus placebo                                                           | SMD                  | fixed                | 0.54             |
| alleviating anxiety                                                   | -0.12 (-0.28 to 0.04)*            | 12                                | 1551                                               | 51.0                       | LIU B 2018 [4]                         | probiotics                                                                                                                                                                       | 4-24 weeks                         | All RCTs     | Adult ( $\geq 18$ y)                                                                  | probiotics vs. placebo                                                              | SMD                  | random               | 0.139            |
| Preclinical psychological symptoms of anxiety, depression, and stress | 0.34 (0.07 to 0.61)               | 9                                 | 785                                                | 67.0                       | MCKEAN J 2017[5]                       | probiotics                                                                                                                                                                       | 21-56 days                         | All RCTs     | adult healthy volunteers (aged $\geq 18$ years)                                       | probiotics vs. placebo                                                              | SMD                  | random               | NP               |

|                                                      |                           |    |      |      |                  |                            |                     |          |                                                                               |                        |     |        |                 |
|------------------------------------------------------|---------------------------|----|------|------|------------------|----------------------------|---------------------|----------|-------------------------------------------------------------------------------|------------------------|-----|--------|-----------------|
| depressive symptoms                                  | -0.31<br>(-0.56 to -0.07) | 19 | 1901 | 82.0 | GOH K K 2019 [6] | probiotics                 | 4-20 weeks          | All RCTs | general population or clinical population                                     | probiotics vs. placebo | SMD | random | No serious bias |
|                                                      | -0.75<br>(-1.09 to -0.41) | 3  | 144  | 0.0  |                  |                            |                     |          | patients with major depressive disorder                                       |                        |     |        |                 |
|                                                      | -0.26<br>(-0.70 to -0.17) | 7  | 722  | 84.0 |                  |                            |                     |          | Other clinical diagnosis population                                           |                        |     |        |                 |
|                                                      | -0.25<br>(-0.60 to 0.11)* | 12 | 1035 | 82.0 |                  |                            |                     |          | Health population                                                             |                        |     |        |                 |
|                                                      | -0.01<br>(-0.30 to 0.27)* | 11 | 1070 | 71.0 |                  | Single strain probiotics   |                     |          | general population or clinical population                                     |                        |     |        |                 |
|                                                      | -0.57<br>(-0.96 to -0.18) | 13 | 831  | 85.0 |                  | multiple strain probiotics |                     |          |                                                                               |                        |     |        |                 |
| schizophrenia symptoms (total PANSS score)           | -0.09<br>(-0.38 to 0.20)* | 3  | 172  | 0.0  | NG Q X 2019[7]   | probiotic                  | NP                  | All RCTs | patients with at least moderately severe psychotic symptoms, aged 18–65 years | probiotics vs. Placebo | SMD | fixed  | NA              |
| Subjective stress level                              | -0.14<br>(-0.27 to -0.01) | 6  | 1043 | 0.0  | ZHANG N 2020[8]  | Probiotics                 | 30 days to 24 weeks | All RCTs | participants were in a healthy state, without known major health problems     | probiotics vs placebo  | SMD | fixed  | NA              |
| Stress-related subthreshold anxiety/depression level | -0.13<br>(-0.26 to -0.00) | 9  | 940  | 11.0 |                  |                            |                     |          |                                                                               |                        |     |        |                 |
| Anxiety                                              | -0.23<br>(-0.54 to 0.08)* | 3  | 171  | 0.0  | WILSON B 2019[9] | prebiotics                 | 2-12 weeks          | All RCTs | Adult patients ≥18 and ≤64 y with Irritable bowel syndrome (IBS) or           | vs. placebo            | SMD | random | No serious bias |

|                                |                              |    |     |      |                               |                                                   |    |                             |  |                                 |                                                     |              |     |        |      |
|--------------------------------|------------------------------|----|-----|------|-------------------------------|---------------------------------------------------|----|-----------------------------|--|---------------------------------|-----------------------------------------------------|--------------|-----|--------|------|
|                                |                              |    |     |      |                               |                                                   |    |                             |  |                                 | other<br>Functional<br>bowel<br>disorders<br>(FBDs) |              |     |        |      |
| continuous anxiety<br>outcomes | -0.03(-0.21<br>to 0.14)*     | 5  | 617 | 12.0 | COHEN<br>KADOSH<br>K 2021[10] | pro-<br>prebiotic<br>administration<br>(any form) | or | 8-84 days                   |  | Controlled<br>trials            | Mean age in<br>the range of<br>10–24 years<br>old   | vs. controls | SMD | random | NP   |
| depression                     | -0.08<br>(-0.30 to<br>0.15)* | 5  | NP  | NP   | Liu RT<br>2019[11]            | prebiotic                                         |    | four hours to four<br>weeks |  | controlled<br>clinical<br>trial | Patient with<br>depression<br>or anxiety            | Vs. placebo  | SMD | random | NP   |
| anxiety                        | 0.12 (-0.03<br>to 0.27)*     | 4  |     |      |                               |                                                   |    |                             |  |                                 |                                                     |              |     |        |      |
| depression                     | -0.24<br>(-0.36 to<br>-0.12) | 23 |     | 48.2 |                               | probiotic                                         |    | eight days to 45 weeks      |  |                                 |                                                     |              |     |        | 0.08 |
| anxiety                        | -0.10<br>(-0.19 to<br>-0.01) | 22 |     | 5.0  |                               |                                                   |    |                             |  |                                 |                                                     |              |     |        | 0.49 |

\* No statistical significance; CI, confidence interval; RCT, randomized controlled trial; RR, relative risk; HR, hazard ratio; MD, mean difference; SMD, standard mean difference; WMD, weighted mean difference; OR, odds ratio; NA, not available; NP, not published.

## References

1. Lv, T.; Ye, M.; Luo, F.; Hu, B.; Wang, A.; Chen, J.; Yan, J.; He, Z.; Chen, F.; Qian, C.; et al. Probiotics treatment improves cognitive impairment in patients and animals: A systematic review and meta-analysis. *Neuroscience & Biobehavioral Reviews* **2021**, *120*, 159-172, doi: 10.1016/j.neubiorev.2020.10.027.
2. Krüger, J.F.; Hillesheim, E.; Pereira, A.C.S.N.; Camargo, C.Q.; Rabito, E.I. Probiotics for dementia: a systematic review and meta-analysis of randomized controlled trials. *Nutr. Rev.* **2021**, *79*, 160-170, doi: 10.1093/nutrit/nuaa037.
3. Den, H.; Dong, X.; Chen, M.; Zou, Z. Efficacy of probiotics on cognition, and biomarkers of inflammation and oxidative stress in adults with Alzheimer's disease or mild cognitive impairment — a meta-analysis of randomized controlled trials. *Aging* **2020**, *12*, 4010-4039, doi: 10.18632/aging.102810.
4. Liu, B.; He, Y.; Wang, M.; Liu, J.; Ju, Y.; Zhang, Y.; Liu, T.; Li, L.; Li, Q. Efficacy of probiotics on anxiety-A meta-analysis of randomized controlled trials. *Depress. Anxiety* **2018**, *35*, 935-945, doi: 10.1002/da.22811.
5. Mckean, J.; Naug, H.; Nikbakht, E.; Amiet, B.; Colson, N. Probiotics and Subclinical Psychological Symptoms in Healthy Participants: A Systematic Review and Meta-Analysis. *The Journal of Alternative and Complementary Medicine* **2017**, *23*, 249-258, doi: 10.1089/acm.2016.0023.

6. Goh, K.K.; Liu, Y.; Kuo, P.; Chung, Y.E.; Lu, M.; Chen, C. Effect of probiotics on depressive symptoms: A meta-analysis of human studies. *Psychiat. Res.* **2019**, *282*, 112568, doi: 10.1016/j.psychres.2019.112568.
7. Ng, Q.X.; Soh, A.Y.S.; Venkatanarayanan, N.; Ho, C.Y.X.; Lim, D.Y.; Yeo, W. A Systematic Review of the Effect of Probiotic Supplementation on Schizophrenia Symptoms. *Neuropsychobiology* **2019**, *78*, 1-6, doi: 10.1159/000498862.
8. Zhang, N.; Zhang, Y.; Li, M.; Wang, W.; Liu, Z.; Xi, C.; Huang, X.; Liu, J.; Huang, J.; Tian, D.; et al. Efficacy of probiotics on stress in healthy volunteers: A systematic review and meta-analysis based on randomized controlled trials. *Brain and Behavior* **2020**, *10*, doi: 10.1002/brb3.1699.
9. Wilson, B.; Rossi, M.; Dimidi, E.; Whelan, K. Prebiotics in irritable bowel syndrome and other functional bowel disorders in adults: a systematic review and meta-analysis of randomized controlled trials. *The American Journal of Clinical Nutrition* **2019**, *109*, 1098-1111, doi: 10.1093/ajcn/nqy376.
10. Cohen Kadosh, K.; Basso, M.; Knytl, P.; Johnstone, N.; Lau, J.Y.F.; Gibson, G.R. Psychobiotic interventions for anxiety in young people: a systematic review and meta-analysis, with youth consultation. *Transl. Psychiat.* **2021**, *11*, doi: 10.1038/s41398-021-01422-7.
11. Liu, R.T.; Walsh, R.F.L.; Sheehan, A.E. Prebiotics and probiotics for depression and anxiety: A systematic review and meta-analysis of controlled clinical trials. *Neuroscience & Biobehavioral Reviews* **2019**, *102*, 13-23, doi: 10.1016/j.neubiorev.2019.03.023.
