# Supplementary material for: Gastrointestinal Microbiome and Multiple Health Outcomes: Umbrella Review
Source: MDPI journal article supplement (doi:10.3390/nu14183726), 2022-09-09
Supplement: s1 [file s1]

**Supplement Table S3.** Prebiotics/probiotics/synbiotics and immune and metabolic outcomes.

| outcome(s) of interest                                           | estimated summary effect (95% CI) | number of studies / total studies | number of intervention group or total participants | Heterogeneity ( <i>I</i> <sup>2</sup> , %) | the first author + year of publication | Intervention                                                                                                                                                                         | Duration of Intervention/follow-up | study design | populations                                                               | outcome comparison   | meta-analysis metric    | type of effect model | publication bias |            |
|------------------------------------------------------------------|-----------------------------------|-----------------------------------|----------------------------------------------------|--------------------------------------------|----------------------------------------|--------------------------------------------------------------------------------------------------------------------------------------------------------------------------------------|------------------------------------|--------------|---------------------------------------------------------------------------|----------------------|-------------------------|----------------------|------------------|------------|
| total cholesterol concentrations after prebiotic supplementation | -0.25 (-0.48 to -0.02)            | 9                                 | 313                                                | 14.4                                       | BESERRA B 2015[1]                      | prebiotic OR fructo-oligosaccharide OR fructooligosaccharide OR galacto-oligosaccharide OR galactooligosaccharide OR inulin OR lactulose OR FOS OR GOS OR Oligofructose OR synbiotic | NP                                 | All RCTs     | Overweight (body mass index ≥ 25 kg/m <sup>2</sup> ) or obese individuals | any versus none      | SMD                     | random               | No serious bias  |            |
| LDL-c concentrations after prebiotic supplementation             | -0.2 (-0.44 to -0.00)             | 9                                 | 313                                                | 0.0                                        |                                        |                                                                                                                                                                                      |                                    |              |                                                                           |                      |                         |                      |                  |            |
| triglycerides concentrations after synbiotics supplementation    | -0.43 (-0.70 to 0.15)*            | 3                                 | 148                                                | 0.0                                        |                                        |                                                                                                                                                                                      |                                    |              |                                                                           |                      |                         |                      |                  |            |
| fasting insulin after synbiotics supplementation                 | -0.39 (-0.75 to -0.02)            | 3                                 | 180                                                | 0.0                                        |                                        |                                                                                                                                                                                      |                                    |              |                                                                           |                      |                         |                      |                  |            |
| triglycerides concentrations after prebiotic supplementation     | -0.72 (-1.20 to -0.23)            | 9                                 | 313/513                                            | 32.7                                       |                                        |                                                                                                                                                                                      |                                    |              |                                                                           |                      |                         |                      |                  |            |
| HDL-c concentrations after prebiotic supplementation             | 0.49 (0.01 to 0.97)               | 9                                 | 313/513                                            | 0.0                                        |                                        |                                                                                                                                                                                      |                                    |              |                                                                           |                      |                         |                      |                  |            |
| diamine oxidase                                                  | -0.78(-0.93 to -0.63)             | 3                                 | 147/293                                            | 0.0                                        | CHEN X R 2021[2]                       | early nutrition                                                                                                                                                                      | enteral (EEN)                      | ≥ 14 days    | All RCTs                                                                  | All met patients the | early enteral nutrition | MD                   | Random           | No serious |

|                                  |                                |    |          |      |               |                     |                     |          |                                                                                                                                                                                                                                                                                                                                                                                                                                             |                                           |     |        |      |
|----------------------------------|--------------------------------|----|----------|------|---------------|---------------------|---------------------|----------|---------------------------------------------------------------------------------------------------------------------------------------------------------------------------------------------------------------------------------------------------------------------------------------------------------------------------------------------------------------------------------------------------------------------------------------------|-------------------------------------------|-----|--------|------|
| D-lactic acid                    | -0.06(-0.07 to -0.05)          | 4  | 162/324  | 0.0  |               | combined probiotics | with                |          | criteria of severe stroke set by the fourth national Cerebrovascular Disease Conference, and were diagnosed by head CT and MRI; the onset was ≤3 days; Glasgow Coma Scale ≤9 points; gastrointestinal function was normal or basically normal. Exclusion criteria were: patients with previous history of gastrointestinal and metabolic diseases, malignant tumor and malnutrition; patients with severe heart, liver, and kidney failure. | (EEN) combined with probiotics versus EEN |     |        | bias |
| dysbacteriosis rate              | 0.17(0.07 to 0.41)             | 3  | 132/262  | 0.0  |               |                     |                     |          |                                                                                                                                                                                                                                                                                                                                                                                                                                             |                                           | OR  |        |      |
| albumin                          | 3.38(2.74 to 4.02)             | 15 | 637/1271 | 45.0 |               |                     |                     |          |                                                                                                                                                                                                                                                                                                                                                                                                                                             |                                           | MD  |        |      |
| prealbumin                       | 32.20(24.42 to 39.98)          | 7  | 302/601  | 44.0 |               |                     |                     |          |                                                                                                                                                                                                                                                                                                                                                                                                                                             |                                           |     |        |      |
| total protein                    | 4.91(3.20 to 6.62)             | 7  | 336/672  | 77.0 |               |                     |                     |          |                                                                                                                                                                                                                                                                                                                                                                                                                                             |                                           |     |        |      |
| hemoglobin                       | 9.62(7.92 to 11.32)            | 10 | 437/872  | 0.0  |               |                     |                     |          |                                                                                                                                                                                                                                                                                                                                                                                                                                             |                                           |     |        |      |
| immunoglobulin A                 | 0.23(0.12 to 0.34)             | 4  | 144/280  | 20.0 |               |                     |                     |          |                                                                                                                                                                                                                                                                                                                                                                                                                                             |                                           |     |        |      |
| immunoglobulin G                 | 0.33(0.21 to 0.45)             | 3  | 106/208  | 0.0  |               |                     |                     |          |                                                                                                                                                                                                                                                                                                                                                                                                                                             |                                           |     |        |      |
| immunoglobulin M                 | 0.14(0.00 to 0.28)             | 4  | 147/290  | 46.0 |               |                     |                     |          |                                                                                                                                                                                                                                                                                                                                                                                                                                             |                                           |     |        |      |
| TC concentrations                | -3.04(-4.88 to -1.21)mg/dL     | 12 | 767      | 45.9 | YAN S 2019[3] | probiotics          | 6 weeks to 6 months | All RCTs | overweight or obesity was defined according to local standards                                                                                                                                                                                                                                                                                                                                                                              | the probiotics vs. control groups         | WMD | random | NP   |
| LDL concentrations               | -2.28(-3.60 to -0.96)mg/dL     | 11 | 737      | 36.9 |               |                     |                     |          |                                                                                                                                                                                                                                                                                                                                                                                                                                             |                                           |     | fixed  |      |
| HDL concentrations               | -0.26(-2.39 to 1.87)mg/dL*     | 12 | 767      | 95.5 |               |                     |                     |          |                                                                                                                                                                                                                                                                                                                                                                                                                                             |                                           |     | random |      |
| Triglyceride (TG) concentrations | -0.86(-2.54 to 0.83)17.0mg/dL* | 11 | 726      | 17.0 |               |                     |                     |          |                                                                                                                                                                                                                                                                                                                                                                                                                                             |                                           |     | fixed  |      |
| TC                               | -1.23(-3.52 to                 | 5  | NP       | 0.0  |               | single probiotic    |                     |          |                                                                                                                                                                                                                                                                                                                                                                                                                                             |                                           |     | fixed  |      |

[illegible]

[illegible]

|                                                   |                                |    |         |      |                   |            |                                |                            |                                                                            |                                                                                                                             |     |        |    |  |
|---------------------------------------------------|--------------------------------|----|---------|------|-------------------|------------|--------------------------------|----------------------------|----------------------------------------------------------------------------|-----------------------------------------------------------------------------------------------------------------------------|-----|--------|----|--|
| (TC)                                              |                                |    |         |      |                   |            |                                |                            |                                                                            |                                                                                                                             |     |        |    |  |
| high-density lipoprotein cholesterol (HDL-c)      | 0.53 (-0.33 to 1.39)*          | 7  | 428     | 94.3 |                   |            |                                |                            |                                                                            |                                                                                                                             |     |        |    |  |
| low-density lipoprotein cholesterol (LDL-c)       | -0.84 (-1.64 to -0.03)         | 7  | 428     | 93.4 |                   |            |                                |                            |                                                                            |                                                                                                                             |     |        |    |  |
| very-low-density lipoprotein cholesterol (VLDL-c) | -0.44 (-0.70 to -0.18)         | 4  | 235     | 0.0  |                   |            |                                |                            |                                                                            |                                                                                                                             |     |        |    |  |
| CRP                                               | -0.63 (-1.37 to 0.10)*         | 9  | 558     | 93.9 |                   |            |                                |                            |                                                                            |                                                                                                                             |     |        |    |  |
| total anti-oxidant capacity (TAC)                 | 0.04 (-0.75 to 0.83)*          | 3  | 82      | 83.9 | DENG H Y 2020 [9] | Probiotic  | 12 weeks                       | All RCTs                   | Adult human participants who had a diagnosis of AD or MCI (aged over 18 y) | Probiotics versus placebo                                                                                                   | SMD | random | NP |  |
| total glutathione (GSH)                           | 0.04 (-0.28 to 0.35)           | 3  | 82      | 44.1 |                   |            |                                |                            |                                                                            |                                                                                                                             |     | fixed  |    |  |
| malondialdehyde (MDA)                             | -0.60 (-0.91 to -0.28)         | 3  | 82      | 0.0  |                   |            |                                |                            |                                                                            |                                                                                                                             |     |        |    |  |
| nitric oxide (NO)                                 | -0.16 (-0.47 to 0.15)          | 3  | 82      | 4.4  |                   |            |                                |                            |                                                                            |                                                                                                                             |     |        |    |  |
| high-sensitivity C-reactive protein (hs-CRP)      | -0.57(-0.95 to -0.20)          | 2  | 57      | 0.0  |                   |            |                                |                            |                                                                            |                                                                                                                             |     |        |    |  |
| Plasma ammonia concentration (at one month)       | -5.55 (-10.67 to -0.42) μmol/L | 5  | 179/357 | 56.0 | DALAL R 2017 [10] | probiotics | at one month                   | randomised clinical trials | people with any grade of acute or chronic hepatic encephalopathy           | probiotics in any dosage vs. placebo or no intervention, or with any other treatment in people with hepatic encephalopathy. | MD  | random | NP |  |
| Plasma ammonia concentration (at 2 months)        | -5.11 (-14.56 to 4.34) μmol/L* | 4  | 109/211 | 62.0 |                   |            | at 2 months                    |                            |                                                                            |                                                                                                                             |     |        |    |  |
| Plasma ammonia concentration                      | -8.29 (-13.17, -3.41) μmol/L   | 10 | 357/705 | 79.0 |                   |            | follow-up: 1 month to 6 months |                            |                                                                            |                                                                                                                             |     |        |    |  |



[illegible]

[illegible]



[illegible]

|                                              |                                    |   |     |      |                   |                      |            |                 |                                                               |                        |     |         |    |  |  |       |
|----------------------------------------------|------------------------------------|---|-----|------|-------------------|----------------------|------------|-----------------|---------------------------------------------------------------|------------------------|-----|---------|----|--|--|-------|
| IgA                                          | 0.24 (-0.09 to 0.57)*              | 4 |     | 14.0 |                   |                      |            |                 |                                                               |                        |     |         |    |  |  | 0.729 |
| IgA secretion rate                           | 4.21 (-8.35 to 16.77)*             | 3 |     | 13.8 |                   |                      |            |                 |                                                               |                        |     |         |    |  |  | 0.208 |
| The efficacy of syn and probiotics on hs-CRP | -0.58 (-0.79 to -0.37)             | 8 | 359 | 0.0  | ASKARI G 2021[21] | Synbiotic probiotics | or NP      | clinical trials | age >12 years old and disease duration between 2 and 20 years | Vs. Control group      | SMD | rando m |    |  |  | 0.195 |
| IL-10                                        | -0.12 (-2.11 to 1.87) pg/ml*       | 5 | 184 | 93.9 |                   |                      |            |                 |                                                               |                        | WMD |         |    |  |  | 0.660 |
| IL-6                                         | -7.79 (-13.81 to -1.77) pg/ml      | 6 | 214 | 91.9 |                   |                      |            |                 |                                                               |                        |     |         |    |  |  | 0.191 |
| TNF- $\alpha$                                | -1.05 (-2.01 to -0.10) pg/ml       | 5 | 184 | 85.2 |                   |                      |            |                 |                                                               |                        |     |         |    |  |  | 0.102 |
| ESR: Erythrocyte Sedimentation Rate          | 3.05 (-7.60 to 13.7) mm/h*         | 3 | 90  | 71.5 |                   |                      |            |                 |                                                               |                        |     |         |    |  |  | 0.450 |
| GSH: Glutathione                             | 1311 (-55.68 to 81.91) $\mu$ mol/L | 4 | 222 | 88.8 |                   |                      |            |                 |                                                               |                        |     |         |    |  |  | 0.099 |
| MDA: Malondialdehyde                         | -0.36 (-0.68 to -0.04)             | 5 | 268 | 41.0 |                   |                      |            |                 |                                                               |                        | SMD |         |    |  |  | 0.058 |
| TAC                                          | 0.08 (-0.16 to -0.32)              | 5 | 268 | 0.0  |                   |                      |            |                 |                                                               |                        |     |         |    |  |  | 0.286 |
| HOMA-IR                                      | -0.71 (-1.05 to -0.37)             | 4 | 222 | 0.0  |                   |                      |            |                 |                                                               |                        | WMD |         |    |  |  | 0.133 |
| HOMA- $\beta$                                | -15.18 (-22.08 to -8.28)           | 3 | 174 | 0.0  |                   |                      |            |                 |                                                               |                        |     |         |    |  |  | 0.096 |
| serum creatinine                             | 0.08 (-0.13 to 0.28) mg/dL*        | 5 | 126 | 0.0  | JIA L P 2018[22]  | probiotics           | 1-6 momths | All RCTs        | adult chronic kidney disease (CKD) patients                   | probiotics vs controls | MD  | rando m | NP |  |  |       |
| blood urea                                   | -1.38 (-9.26 to 6.50)*             | 3 | 164 | 0.0  |                   |                      |            |                 |                                                               |                        |     |         |    |  |  |       |
| p-cresyl sulfate                             | -0.57 (-0.99 to -0.14)             | 3 | 125 | 25.0 |                   |                      |            |                 |                                                               |                        | SMD |         |    |  |  |       |
| hemoglobin                                   | 0.21 (-0.48 to 0.91)*              | 3 | 93  | 20.0 |                   |                      |            |                 |                                                               |                        | MD  |         |    |  |  |       |



[illegible]

[illegible]

|                           |                                 |   |     |      |                            |                                                                   |            |                 |                                                       |                        |     |        |                 |      |
|---------------------------|---------------------------------|---|-----|------|----------------------------|-------------------------------------------------------------------|------------|-----------------|-------------------------------------------------------|------------------------|-----|--------|-----------------|------|
| LDL-c                     | -6.60 (-14.41 to 1.21) mg/dL*   | 7 |     | 52.7 |                            |                                                                   |            |                 |                                                       |                        |     |        |                 | 0.69 |
| HDL-c                     | 0.27 (-2.80 to 3.34) mg/dL*     | 7 |     | 75.7 |                            |                                                                   |            |                 |                                                       |                        |     |        |                 | 0.89 |
| cortisol                  | -0.28 (-0.65 to 0.09)*          | 3 | NP  | 0.0  | AS'HABI A 2020 [32]        | probiotics (supplement or food)                                   | 2-20 weeks | All RCTs        | athletes                                              | Vs. control            | SMD | random | 0.20            |      |
| HDL- C                    | 2.51 (1.04 to 6.05) mg/dL       | 6 |     | 50.3 |                            |                                                                   |            |                 |                                                       |                        |     |        | 0.25            |      |
| LDL-C                     | -4.06 (-14.70 to 6.58) mg/dL*   | 3 |     | 0.0  |                            |                                                                   |            |                 |                                                       |                        |     |        | 0.98            |      |
| TC                        | -5.99 (-10.83 to -6.04) mg/dL   | 6 |     | 67.5 |                            |                                                                   |            |                 |                                                       |                        |     |        | 0.70            |      |
| TG                        | -32.26 (-60.44 to -4.08) mg/dL  | 6 |     | 93.0 |                            |                                                                   |            |                 |                                                       |                        |     |        | 0.48            |      |
| serum calcium levels      | 3.82 (1.05 to 6.59)             | 4 | NP  | 98.0 | EJTAHED H 2021[33]         | probiotic                                                         | NP         | clinical trial  | adults                                                | Vs. control diets      | SMD | Random | No serious bias |      |
| serum phosphorus levels   | 1.14 (-0.44 to 2.73)*           | 4 |     | 96.1 |                            |                                                                   |            |                 |                                                       |                        |     |        |                 |      |
| parathyroid hormone (PTH) | -5.35 (-9.83 to -0.86)          | 3 |     | 98.2 |                            |                                                                   |            |                 |                                                       |                        |     |        |                 |      |
| urinary calcium           | 4.85 (1.16 to 8.53)             | 3 |     | 97.6 |                            |                                                                   |            |                 |                                                       |                        |     |        |                 |      |
| CRP                       | -0.60 (-0.98 to -0.23)          | 7 | 342 | 64.0 | MCLOUGHLIN R F 2017[34]    | prebiotics, delivered orally, intravenously, or perrectum (enema) | 2-12 weeks | All RCTs        | human participants of any age and sex                 | vs. placebo or control | SMD | random | NP              |      |
| IL-6                      | 0.35 (-0.84 to 0.13)*           | 6 | 313 | 75.0 |                            |                                                                   |            |                 |                                                       |                        |     |        |                 |      |
| TNF-α                     | -0.49 (-1.20 to 0.22)*          | 4 | 219 | 84.0 |                            |                                                                   |            |                 |                                                       |                        |     |        |                 |      |
| postprandial ghrelin      | -71.66 (-148.83 to 5.50) pg/ml* | 3 | NP  | 84.6 | DA SILVA BORGES D 2020[35] | prebiotic synbiotic                                               | or NP      | clinical trials | overweight or obesity diagnosis (BMI ≥ 25 kg/m²), (3) | Vs. control            | WMD | random | NP              |      |

|           |                        |   |     |      |                  |                                                                                                                      |                    |                                                                           |                                                                                                         | adults and older adults (≥ 18 y)      |     |        |      |  |  |
|-----------|------------------------|---|-----|------|------------------|----------------------------------------------------------------------------------------------------------------------|--------------------|---------------------------------------------------------------------------|---------------------------------------------------------------------------------------------------------|---------------------------------------|-----|--------|------|--|--|
| levels of | -0.24 (-0.69 to 0.21)* | 7 | NP  | 82.7 | QU H 2019[36]    | microbiota-driven therapy (probiotic, prebiotic or symbiotic)                                                        | 14-180 days        | the study described a randomized, controlled, parallel or crossover trial | healthy elderly individuals with age>60 years                                                           | vs. placebo                           | SMD | random | 0.37 |  |  |
| IL-6      | -0.13 (-0.74 to 0.49)* | 6 |     | 90.7 |                  |                                                                                                                      |                    |                                                                           |                                                                                                         |                                       |     |        | 0.26 |  |  |
| IL-10     | 1.00 (-0.15 to 2.15)*  | 6 |     | 96.3 |                  |                                                                                                                      |                    |                                                                           |                                                                                                         |                                       |     |        | 0.20 |  |  |
| CRP       | -1.28 (-2.62 to 0.06)* | 4 |     | 96.2 |                  |                                                                                                                      |                    |                                                                           |                                                                                                         |                                       |     |        | NP   |  |  |
| IL-8      | -0.03 (-0.67 to 0.61)* | 4 |     | 88.0 |                  |                                                                                                                      |                    |                                                                           |                                                                                                         |                                       |     |        |      |  |  |
| CRP       | 0.02 (-0.32 to 0.36)*  | 3 | 135 | 0.0  | ZHU H F 2020[37] | treated with microecological preparations (probiotics, prebiotics, synbiotics, or a combination of two preparations) | 15 days to 6months | All RCTs                                                                  | obese adults (age ≥18 years) who had undergone bariatric surgery (a type of surgery was not restricted) | Vs. placebo or conventional treatment | SMD | Random | NP   |  |  |
| IL-6      | -0.10 (-0.81 to 0.61)* | 3 | 135 | 0.0  |                  |                                                                                                                      |                    |                                                                           |                                                                                                         |                                       |     | random |      |  |  |
| TNF-α     | -0.29 (-0.64 to 0.05)* | 3 | 135 | 0.0  |                  |                                                                                                                      |                    |                                                                           |                                                                                                         |                                       |     | fixed  |      |  |  |

\* No statistical significance; CI, confidence interval; RCT, randomized controlled trial; RR, relative risk; HR, hazard ratio; MD, mean difference; SMD, standard mean difference; WMD, weighted mean difference; OR, odds ratio; NA, not available; NP, not published.

## References

1. Beserra, B.T.S.; Fernandes, R.; Do Rosario, V.A.; Mocellin, M.C.; Kuntz, M.G.F.; Trindade, E.B.S.M. A systematic review and meta-analysis of the prebiotics and synbiotics effects on glycaemia, insulin concentrations and lipid parameters in adult patients with overweight or obesity. *Clin. Nutr.* **2015**, *34*, 845-858, doi: 10.1016/j.clnu.2014.10.004.
2. Chen, X.; Hu, Y.; Yuan, X.; Yang, J.; Ka, L. Effect of early enteral nutrition combined with probiotics in patients with stroke: a meta-analysis of randomized controlled trials. *Eur. J. Clin. Nutr.* **2022**, *76*, 592-603, doi: 10.1038/s41430-021-00986-3.
3. Yan, S.M.; Tian, Z.W.; Li, M.; Li, B.; Cui, W.W. Effects of probiotic supplementation on the regulation of blood lipid levels in overweight or obese subjects: a meta-analysis. *Food Funct.* **2019**, *10*, 1747-1759, doi: 10.1039/c8fo02163e.
4. Wang, Z.; Xin, S.; Ding, L.; Ding, W.; Hou, Y.; Liu, C.; Zhang, X. The Potential Role of Probiotics in Controlling Overweight/Obesity and Associated Metabolic Parameters in Adults: A Systematic Review and Meta-Analysis. *Evid.-Based Compl. Alt.* **2019**, *2019*, 1-14, doi: 10.1155/2019/3862971.

5. Pontes, K.S.D.S.; Guedes, M.R.; Cunha, M.R.D.; Mattos, S.D.S.; Barreto Silva, M.I.; Neves, M.F.; Marques, B.C.A.A.; Klein, M.R.S.T. Effects of probiotics on body adiposity and cardiovascular risk markers in individuals with overweight and obesity: A systematic review and meta-analysis of randomized controlled trials. *Clin. Nutr.* **2021**, *40*, 4915-4931, doi: 10.1016/j.clnu.2021.06.023.
6. Rouhani, M.H.; Hadi, A.; Ghaedi, E.; Salehi, M.; Mahdavi, A.; Mohammadi, H. Do probiotics, prebiotics and synbiotics affect adiponectin and leptin in adults? A systematic review and meta-analysis of clinical trials. *Clin. Nutr.* **2019**, *38*, 2031-2037, doi: 10.1016/j.clnu.2018.09.033.
7. Cozzolino, M.; Vitagliano, A.; Pellegrini, L.; Chiurazzi, M.; Andriasani, A.; Ambrosini, G.; Garrido, N. Therapy with probiotics and synbiotics for polycystic ovarian syndrome: a systematic review and meta-analysis. *Eur. J. Nutr.* **2020**, *59*, 2841-2856, doi: 10.1007/s00394-020-02233-0.
8. Li, Y.; Tan, Y.; Xia, G.; Shuai, J. Effects of probiotics, prebiotics, and synbiotics on polycystic ovary syndrome: a systematic review and meta-analysis. *Crit. Rev. Food Sci.* **2021**, 1-17, doi: 10.1080/10408398.2021.1951155.
9. Den, H.; Dong, X.; Chen, M.; Zou, Z. Efficacy of probiotics on cognition, and biomarkers of inflammation and oxidative stress in adults with Alzheimer's disease or mild cognitive impairment — a meta-analysis of randomized controlled trials. *Aging* **2020**, *12*, 4010-4039, doi: 10.18632/aging.102810.
10. Dalal, R.; Mcgee, R.G.; Riordan, S.M.; Webster, A.C. Probiotics for people with hepatic encephalopathy. *Cochrane Db. Syst. Rev.* **2021**, 2021, doi: 10.1002/14651858.CD008716.pub3.
11. Cao, Q.; Yu, C.; Yang, S.; Cao, H.; Chen, P.; Deng, M.; Li, L. Effect of probiotic treatment on cirrhotic patients with minimal hepatic encephalopathy: A meta-analysis. *Hepatob. Pancreat. Dis.* **2018**, *17*, 9-16, doi: 10.1016/j.hbpd.2018.01.005.
12. Khalesi, S.; Johnson, D.W.; Campbell, K.; Williams, S.; Fenning, A.; Saluja, S.; Irwin, C. Effect of probiotics and synbiotics consumption on serum concentrations of liver function test enzymes: a systematic review and meta-analysis. *Eur. J. Nutr.* **2018**, *57*, 2037-2053, doi: 10.1007/s00394-017-1568-y.
13. Loman, B.R.; Hernández-Saavedra, D.; An, R.; Rector, R.S. Prebiotic and probiotic treatment of nonalcoholic fatty liver disease: a systematic review and meta-analysis. *Nutr. Rev.* **2018**, *76*, 822-839, doi: 10.1093/nutrit/nuy031.
14. Khan, M.Y.; Mihali, A.B.; Rawala, M.S.; Aslam, A.; Siddiqui, W.J. The promising role of probiotic and synbiotic therapy in aminotransferase levels and inflammatory markers in patients with nonalcoholic fatty liver disease – a systematic review and meta-analysis. *Eur. J. Gastroen. Hepat.* **2019**, *31*, 703-715, doi: 10.1097/MEG.0000000000001371.
15. Skonieczna-zydecka, K.; Kaczmarczyk, M.; Ioniewski, I.; Lara, L.; Koulaouzidis, A.; Misera, A.; Maciejewska, D.; Marlicz, W. A Systematic Review, Meta-Analysis, and Meta-Regression Evaluating the Efficacy and Mechanisms of Action of Probiotics and Synbiotics in the Prevention of Surgical Site Infections and Surgery-Related Complications. *Journal of Clinical Medicine* **2018**, *7*, 556, doi: 10.3390/jcm7120556.
16. Milajerdi, A.; Mousavi, S.M.; Sadeghi, A.; Salari-Moghaddam, A.; Parohan, M.; Larijani, B.; Esmailzadeh, A. The effect of probiotics on inflammatory biomarkers: a meta-analysis of randomized clinical trials. *Eur. J. Nutr.* **2020**, *59*, 633-649, doi: 10.1007/s00394-019-01931-8.
17. Pan, H.; Li, R.; Li, T.; Wang, J.; Liu, L. Whether Probiotic Supplementation Benefits Rheumatoid Arthritis Patients: A Systematic Review and Meta-Analysis. *Engineering* **2017**, *3*, 115-121, doi: 10.1016/J.ENG.2017.01.006.
18. Fu, Y.; Chu, Q.; Ashuro, A.A.; Di, D.; Zhang, Q.; Liu, X.; Fan, Y. The Effect of Probiotics, Prebiotics, and Synbiotics on CD4 Counts in HIV-Infected Patients: A Systematic Review and Meta-Analysis. *Biomed Res. Int.* **2020**, *2020*, 1-11, doi: 10.1155/2020/7947342.
19. Zhang, X.; Chen, M.; Geng, S.; Yu, J.; Kuang, Y.; Luo, H.; Wang, K. Effects of Probiotics on Diarrhea and CD4 Cell Count in People Living With HIV: A Systematic Review and Meta-Analysis. *Frontiers in Pharmacology* **2021**, *12*, 570520, doi: 10.3389/fphar.2021.570520.
20. Tavakoly, R.; Hadi, A.; Rafie, N.; Talaei, B.; Marx, W.; Arab, A. Effect of Probiotic Consumption on Immune Response in Athletes: A Meta-analysis. *Int. J. Sports Med.* **2021**, *42*, 769-781, doi: 10.1055/a-1463-3303.



21. Askari, G.; Ghavami, A.; Shahdadian, F.; Moravejolahkami, A.R. Effect of synbiotics and probiotics supplementation on autoimmune diseases: A systematic review and meta-analysis of clinical trials. *Clin. Nutr.* **2021**, *40*, 3221-3234, doi: 10.1016/j.clnu.2021.02.015.
22. Jia, L.; Jia, Q.; Yang, J.; Jia, R.; Zhang, H. Efficacy of Probiotics Supplementation On Chronic Kidney Disease: a Systematic Review and Meta-Analysis. *Kidney and Blood Pressure Research* **2018**, *43*, 1623-1635, doi: 10.1159/000494677.
23. Tao, S.B.; Tao, S.Y.; Cheng, Y.M.; Liu, J.; Ma, L.; Fu, P. Effects of probiotic supplements on the progression of chronic kidney disease: A meta-analysis. *Nephrology* **2019**, *24*, 1122-1130, doi: 10.1111/nep.13549.
24. Thongprayoon, C.; Kaewput, W.; Hatch, S.T.; Bathini, T.; Sharma, K.; Wijarnpreecha, K.; Ungprasert, P.; D Costa, M.; Mao, M.A.; Cheungpasitporn, W. Effects of Probiotics on Inflammation and Uremic Toxins Among Patients on Dialysis: A Systematic Review and Meta-Analysis. *Digest. Dis. Sci.* **2019**, *64*, 469-479, doi: 10.1007/s10620-018-5243-9.
25. Bakhtiary, M.; Morvaridzadeh, M.; Agah, S.; Rahimlou, M.; Christopher, E.; Zadroz, J.R.; Heshmati, J. Effect of Probiotic, Prebiotic, and Synbiotic Supplementation on Cardiometabolic and Oxidative Stress Parameters in Patients With Chronic Kidney Disease: A Systematic Review and Meta-analysis. *Clin. Ther.* **2021**, *43*, e71-e96, doi: 10.1016/j.clinthera.2020.12.021.
26. Mcfarlane, C.; Ramos, C.I.; Johnson, D.W.; Campbell, K.L. Prebiotic, Probiotic, and Synbiotic Supplementation in Chronic Kidney Disease: A Systematic Review and Meta-analysis. *J. Renal Nutr.* **2019**, *29*, 209-220, doi: 10.1053/j.jrn.2018.08.008.
27. Bock, P.M.; Telo, G.H.; Ramalho, R.; Sbaraini, M.; Leivas, G.; Martins, A.F.; Schaan, B.D. The effect of probiotics, prebiotics or synbiotics on metabolic outcomes in individuals with diabetes: a systematic review and meta-analysis. *Diabetologia* **2021**, *64*, 26-41, doi: 10.1007/s00125-020-05295-1.
28. Zheng, H.J.; Guo, J.; Jia, Q.; Huang, Y.S.; Huang, W.; Zhang, W.; Zhang, F.; Liu, W.J.; Wang, Y. The effect of probiotic and synbiotic supplementation on biomarkers of inflammation and oxidative stress in diabetic patients: A systematic review and meta-analysis of randomized controlled trials. *Pharmacol. Res.* **2019**, *142*, 303-313, doi: 10.1016/j.phrs.2019.02.016.
29. Tao, Y.; Gu, Y.; Mao, X.; Zhang, L.; Pei, Y. Effects of probiotics on type II diabetes mellitus: a meta-analysis. *J. Transl. Med.* **2020**, *18*, 30, doi: 10.1186/s12967-020-02213-2.
30. Chi, C.; Li, C.; Wu, D.; Buys, N.; Wang, W.; Fan, H.; Sun, J. Effects of Probiotics on Patients with Hypertension: a Systematic Review and Meta-Analysis. *Curr. Hypertens. Rep.* **2020**, *22*, doi: 10.1007/s11906-020-01042-4.
31. Hadi, A.; Arab, A.; Khalesi, S.; Rafie, N.; Kafeshani, M.; Kazemi, M. Effects of probiotic supplementation on anthropometric and metabolic characteristics in adults with metabolic syndrome: A systematic review and meta-analysis of randomized clinical trials. *Clin. Nutr.* **2021**, *40*, 4662-4673, doi: 10.1016/j.clnu.2021.05.027.
32. As Habi, A.; Nazari, M.; Hajianfar, H.; Arab, A.; Faghfoori, Z. A systematic review and meta-analysis of probiotic consumption and metabolic status of athletes. *Int. J. Food Prop.* **2020**, *23*, 941-954, doi: 10.1080/10942912.2020.1772286.
33. Malmir, H.; Ejtahed, H.; Soroush, A.; Mortazavian, A.M.; Fahimfar, N.; Ostovar, A.; Esmailzadeh, A.; Larijani, B.; Hasani-Ranjbar, S. Probiotics as a New Regulator for Bone Health: A Systematic Review and Meta-Analysis. *Evid.-Based Compl. Alt.* **2021**, *2021*, 1-35, doi: 10.1155/2021/3582989.
34. Mcloughlin, R.F.; Berthon, B.S.; Jensen, M.E.; Baines, K.J.; Wood, L.G. Short-chain fatty acids, prebiotics, synbiotics, and systemic inflammation: a systematic review and meta-analysis. *The American Journal of Clinical Nutrition* **2017**, *106*, n156265, doi: 10.3945/ajcn.117.156265.
35. Da Silva Borges, D.; Fernandes, R.; Thives Mello, A.; Da Silva Fontoura, E.; Soares Dos Santos, A.R.; Santos De Moraes Trindade, E.B. Prebiotics may reduce serum concentrations of C-reactive protein and ghrelin in overweight and obese adults: a systematic review and meta-analysis. *Nutr. Rev.* **2019**, *78*, 235-248, doi: 10.1093/nutrit/nuz045.
36. Qu, H.; Zhang, Y.; Chai, H.; Gao, Z.; Shi, D. Effects of microbiota-driven therapy on inflammatory responses in elderly individuals: A systematic review and meta-analysis. *PLoS One* **2019**, *14*, e211233, doi: 10.1371/journal.pone.0211233.
37. Zhu, H.; Ren, Z.; Zang, Y.; Hua, H.; Lu, J.; Xu, Q.; Zhu, S. Effects of Microecological Preparations on Obese Patients after Bariatric Surgery: A Systematic Review and Meta-Analysis. *Evid.-Based Compl. Alt.* **2020**, *2020*, 1-10, doi: 10.1155/2020/8724546.
