# Supplementary material for: Gastrointestinal Microbiome and Multiple Health Outcomes: Umbrella Review
Source: MDPI journal article supplement (doi:10.3390/nu14183726), 2022-09-09
Supplement: s1 [file s1]

**Supplement Table S4.** Prebiotics/probiotics/synbiotics and immune and gastrointestinal disease.

| outcome(s) of interest                                                                                                         | of | estimated summary effect (95% CI) | number of studies / total studies | number of intervention group or total participants | Heterogeneity ( $I^2$ , %) | the first author + year of publication | Intervention                                                                                               | Duration of Intervention/follow-up | study design | populations                                                              | outcome comparison | meta-analysis metric | type of effect model | publication bias |
|--------------------------------------------------------------------------------------------------------------------------------|----|-----------------------------------|-----------------------------------|----------------------------------------------------|----------------------------|----------------------------------------|------------------------------------------------------------------------------------------------------------|------------------------------------|--------------|--------------------------------------------------------------------------|--------------------|----------------------|----------------------|------------------|
| Incidence of C. difficile-associated diarrhea                                                                                  |    | 0.4 (0.3 to 0.52)                 | 31                                | 4525/8672                                          | 0.0                        | GOLDENBERG J Z 2017[1]                 | probiotics                                                                                                 | NP                                 | All RCTs     | participants taking antibiotics                                          | any versus none    | RR                   | random               | No serious bias  |
| Antibiotic-associated diarrhea                                                                                                 |    | 0.58 (0.48 to 0.70)               | 33                                | 8870                                               | 61.0                       |                                        |                                                                                                            |                                    |              |                                                                          |                    |                      |                      |                  |
| the occurrence of diarrhea and positive stool C. difficile cytotoxin assay or culture                                          |    | 0.38 (0.22 to 0.67)               | 6                                 | 597/1194                                           | 39.0                       | WU Z J 2013[2]                         | Lactobacillus                                                                                              | NP                                 | All RCTs     | With or without antibiotics                                              | any versus none    | RR                   | fixed                | NA               |
|                                                                                                                                |    | 0.63(0.31 to 1.28)*               | 4                                 | 431/861                                            | 0.0                        |                                        | Lactobacillus acidophilus                                                                                  |                                    |              |                                                                          |                    |                      |                      |                  |
| incidence of CDI (diarrhea and either positive stool cytotoxin, culture, or polymerase chain reaction testing for C difficile) |    | 0.42(0.3 to 0.57)                 | 19                                | 6261                                               | 0.0                        | SHEN N T 2017[3]                       | probiotics                                                                                                 | NP                                 | All RCTs     | Hospitalized adults (18 years or older)                                  | any versus none    | RR                   | random               | No serious bias  |
|                                                                                                                                |    | 0.32 (0.22 to 0.48)               | 14                                | NP                                                 | 0.0                        |                                        | Timing: study protocol specifying maximum interval from starting antibiotics to starting probiotics, 1-2 d |                                    |              | receiving antibiotic therapy (intravenous, oral, or both) for any reason |                    |                      |                      | NP               |
|                                                                                                                                |    | 0.7 (0.4 to 1.23)*                | 5                                 | NP                                                 | 0.0                        |                                        | Timing: study protocol specifying maximum interval from starting antibiotics to starting probiotics, 3-7 d |                                    |              |                                                                          |                    |                      |                      | NP               |
|                                                                                                                                |    | 0.73 (0.29 to 1.88)*              | 3                                 | NP                                                 | 0.0                        |                                        | L rhamnosus GG                                                                                             |                                    |              |                                                                          |                    |                      |                      | NP               |
|                                                                                                                                |    | 0.63 (0.29 to 1.37)*              | 5                                 | NP                                                 | 0.0                        |                                        | S boulardii                                                                                                |                                    |              |                                                                          |                    |                      |                      | NP               |

|                                                              |                       |    |         |      |                      |                                                                                 |                  |          |                                                                                                                                                            |                                                                                                                        |    |         |                 |
|--------------------------------------------------------------|-----------------------|----|---------|------|----------------------|---------------------------------------------------------------------------------|------------------|----------|------------------------------------------------------------------------------------------------------------------------------------------------------------|------------------------------------------------------------------------------------------------------------------------|----|---------|-----------------|
| Incidence of Clostridium difficile-associated diarrhea(CDAD) | 0.34(0.24 to 0.49)    | 20 | 40/1974 | 0.0  | JOHNSTON B C 2012[4] | any dose of a specified probiotic of any strain                                 | NP               | All RCTs | adult or pediatric patients treated with antibiotics                                                                                                       | any versus none                                                                                                        | RR | rando m | No serious bias |
| clinical remission                                           | 2.40(1.49 to 3.88)    | 3  | 71/162  | 29.0 | DANG X 2020[5]       | probiotic VSL#3 as induction therapy                                            | 6-12weeks        | All RCTs | patients with active UC                                                                                                                                    | any versus none                                                                                                        | OR | Fixed   | 1.34            |
| clinical response                                            | 3.09(1.53 to 6.25)    | 3  | 89/162  | 46.0 |                      |                                                                                 |                  |          |                                                                                                                                                            |                                                                                                                        |    | Rando m | 0.47            |
| Clinical remission                                           | 1.73(1.19 to 2.54)    | 9  | 594     | 55.0 | KAUR L 2020[6]       | Probiotics                                                                      | NP               | All RCTs | People of any age with active ulcerative colitis previously diagnosed by clinical, endoscopic, histologic or surgical remissionas defined by study authors | any placebo                                                                                                            | RR | Rando m | NP              |
|                                                              | 2.02(1.31 to 3.12)    | 5  | 374     | 32.0 |                      |                                                                                 |                  |          |                                                                                                                                                            | probiotics with multiple strains versus placebo                                                                        |    |         |                 |
|                                                              | 1.44(0.79 to 2.63)    | 4  | 220     | 57.0 |                      |                                                                                 |                  |          |                                                                                                                                                            | probiotics with single strain versus placebo                                                                           |    |         |                 |
| improvement in colon endoscopic scores                       | -0.58(-1.11 to -0.05) | 3  | 93      | 85.0 | RUFINO M N 2021[7]   | Synbiotic treatment                                                             | 4weeks to 1 year | All RCTs | Human patients with ulcerative colitis                                                                                                                     | conventional plus a synbiotic or synbiotic treatment alone versus conventional plus placebo or placebo treatment alone | RR | Fixed   | NP              |
| remission rate                                               | 1.40(1.27 to 1.53)    | 27 | 1942    | 0.0  | PENG L J 2019 [8]    | probiotics in conjunction with mesalazine or sulfasalazine or aminosalicic acid | 4-12 weeks       | All RCTs | children or adults with UC regardless of clinical setting                                                                                                  | probiotics in conjunction with mesalazine or sulfasalazine or aminosalicic acid versus                                 | RR | Fixed   | 0.000           |
|                                                              | 1.33(1.16 to 1.54)    | 11 | NP      | 33.4 |                      |                                                                                 |                  |          | children or adults with UC in both                                                                                                                         |                                                                                                                        |    |         |                 |

|                                                                  |                        |                    |     |    |      |                 |   |                         |    |          |                  |                                                            |                                                           |                                            |                                                                             |  |  |  |  |
|------------------------------------------------------------------|------------------------|--------------------|-----|----|------|-----------------|---|-------------------------|----|----------|------------------|------------------------------------------------------------|-----------------------------------------------------------|--------------------------------------------|-----------------------------------------------------------------------------|--|--|--|--|
|                                                                  |                        |                    |     |    |      |                 |   |                         |    |          |                  |                                                            | mild to moderate stages                                   | children or adults with UC in active stage | mesalazine or sulfasalazine or aminosalicylic acid alone                    |  |  |  |  |
|                                                                  |                        | 1.40(1.27 to 1.64) | 16  | NP | 0.0  |                 |   |                         |    |          |                  |                                                            |                                                           |                                            |                                                                             |  |  |  |  |
|                                                                  |                        | 1.36(1.20 to 1.53) | 17  | NP | 19.5 |                 |   |                         |    |          |                  |                                                            | children or adults with UC regardless of clinical setting |                                            | probiotics combined with aminosalicylic acid on UC in 3 types of protiotics |  |  |  |  |
|                                                                  |                        | 1.45(1.24 to 1.70) | 8   | NP | 0.0  |                 |   |                         |    |          |                  |                                                            |                                                           |                                            | probiotics combined with aminosalicylic acid on UC in 2 types of protiotics |  |  |  |  |
|                                                                  |                        | 1.40(1.27 to 1.64) | 2   | NP | 0.0  |                 |   |                         |    |          |                  |                                                            |                                                           |                                            | probiotics combined with aminosalicylic acid on UC in 1 types of protiotics |  |  |  |  |
| the efficacy of EcN in inducing remission for ulcerative colitis | 0.92(0.15 to 5.66)*    | 3                  | 267 |    | 86.0 | LOSURDO 2015[9] | G | Escherichia coli Nissle | NP | All RCTs | Patients with UC | EcN versus standard of care (mesalazine or ciprofloxacin ) | OR                                                        | Fixed                                      | No serious bias                                                             |  |  |  |  |
| Maintenance remission                                            | of 1.07(0.70 to 1.64)* | 4                  | 442 |    | 0.0  |                 |   |                         |    |          |                  |                                                            | Regimen or placebo                                        |                                            | EcN versus standard of care (mesalazine)                                    |  |  |  |  |

|                                                                                                                                                   |                     |   |     |      |                             |                                                                                                                                |             |          |                                                        |                                                                                                                                     |    |        |    |
|---------------------------------------------------------------------------------------------------------------------------------------------------|---------------------|---|-----|------|-----------------------------|--------------------------------------------------------------------------------------------------------------------------------|-------------|----------|--------------------------------------------------------|-------------------------------------------------------------------------------------------------------------------------------------|----|--------|----|
| Clinical relapse                                                                                                                                  | 0.87(0.63 to 1.18)* | 4 | 361 | 17.0 | IHEOZOR-EJIOF OR Z 2020[10] | Probiotics administered in any form (drink, powder, capsule), orally as a single species, or as a cocktail of multiple species | 12-52 weeks | All RCTs | People of any age with ulcerative colitis in remission | Probiotics versus placebo                                                                                                           | RR | Random | NP |
| Maintenance of clinical remission                                                                                                                 | 1.16(0.98 to 1.37)* | 2 | 141 | 0.0  |                             |                                                                                                                                |             |          |                                                        |                                                                                                                                     |    |        |    |
| Clinical relapse                                                                                                                                  | 1.01(0.84 to 1.22)* | 2 | 452 | 0.0  |                             |                                                                                                                                |             |          |                                                        | Probiotics versus 5-aminosalicylic acid (5-ASA) (mesalazine)                                                                        |    |        |    |
| Maintenance of clinical remission                                                                                                                 | 1.06(0.90 to 1.25)* | 1 | 125 | NP   |                             |                                                                                                                                |             |          |                                                        |                                                                                                                                     |    |        |    |
| Clinical relapse                                                                                                                                  | 1.11(0.66 to 1.84)* | 2 | 242 | 14.7 |                             |                                                                                                                                |             |          |                                                        | Probiotic + 5-ASA (mesalazine) versus 5-ASA (mesalazine)                                                                            |    |        |    |
| Maintenance of clinical remission                                                                                                                 | 1.05(0.89 to 1.24)* | 1 | 122 | NP   |                             |                                                                                                                                |             |          |                                                        |                                                                                                                                     |    |        |    |
| remission in active UC patients, assessed with the Ulcerative Colitis Disease Activity Index (UCDAI) and Disease Activity Index (DAI)/Mayo scores | 1.55(1.13 to 2.15)  | 6 | 503 | 29.0 | ASTO E 2019[11]             | probiotic, inulin, fructo-oligosaccharides, FOS, and synbiotic                                                                 | NP          | All RCTs | adults or children with active UC                      | administration (oral or rectal) of probiotics versus placebo or active treatment of UC to induce remission or to maintain remission | RR | random | NP |
| Efficacy of inducing/maintaining remission                                                                                                        | 1.73(1.23 to 2.43)  | 6 | 424 | 35.0 |                             | bifidobacteria-containing probiotics                                                                                           |             |          |                                                        |                                                                                                                                     |    |        |    |
|                                                                                                                                                   | 1.04(0.35 to 3.06)* | 3 | 168 | 78.0 |                             | Probiotics without bifidobacteria                                                                                              |             |          |                                                        |                                                                                                                                     |    |        |    |
|                                                                                                                                                   | 1.99(1.25 to 3.15)  | 4 | 348 | 49.0 |                             | VSL#3                                                                                                                          |             |          |                                                        |                                                                                                                                     |    |        |    |
|                                                                                                                                                   | 1.38(0.86 to 2.21)* | 4 | 313 | 56.0 |                             | probiotic, inulin, fructo-oligosaccharides, FOS, and synbiotic                                                                 |             |          | adults or children with inactive UC                    |                                                                                                                                     |    |        |    |
| Efficacy of Probiotics at Maintaining                                                                                                             | 0.92(0.82 to 1.04)* | 3 | 513 | 0.0  |                             | the probiotic Mutaflor                                                                                                         |             |          | adults or children with active                         | the probiotic Mutaflor with                                                                                                         |    |        |    |

|                                                 |                     |    |            |      |                   |   |   |                                                                                                                           |                    |          |                                                        |                                                                   |    |        |                 |
|-------------------------------------------------|---------------------|----|------------|------|-------------------|---|---|---------------------------------------------------------------------------------------------------------------------------|--------------------|----------|--------------------------------------------------------|-------------------------------------------------------------------|----|--------|-----------------|
| Remission                                       | 1.04)*              |    |            |      |                   |   |   |                                                                                                                           |                    |          | UC or inactive UC                                      | mesalazine                                                        |    |        |                 |
| the incidence of abdominal distension           | 0.27(0.17 to 0.43)  | 11 | 493/981    | 0.0  | CHEN 2021[12]     | X | R | early enteral nutrition (EEN) combined with probiotics                                                                    | ≥ 14 days          | All RCTs | All patients met the criteria of severe stroke         | early enteral nutrition (EEN) combined with probiotics versus EEN | OR | Random | No serious bias |
| the incidence of diarrhea                       | 0.20(0.12 to 0.32)  | 14 | 604/1205   | 0.0  |                   |   |   |                                                                                                                           |                    |          |                                                        |                                                                   |    |        |                 |
| the incidence of vomiting                       | 0.20(0.12 to 0.32)  | 8  | 301/602    | 0.0  |                   |   |   |                                                                                                                           |                    |          |                                                        |                                                                   |    |        |                 |
| the incidence of gastric retention              | 0.25(0.11 to 0.55)  | 3  | 148/296    | 0.0  |                   |   |   |                                                                                                                           |                    |          |                                                        |                                                                   |    |        |                 |
| the incidence of constipation                   | 0.20(0.12 to 0.32)  | 14 | 590/1177   | 0.0  |                   |   |   |                                                                                                                           |                    |          |                                                        |                                                                   |    |        |                 |
| the incidence of reflux                         | 0.47(0.21 to 1.02)* | 7  | 316/632    | 19.0 |                   |   |   |                                                                                                                           |                    |          |                                                        |                                                                   |    |        |                 |
| the incidence of digestive tract hemorrhage     | 0.31(0.18 to 0.52)  | 12 | 537/1072   | 0.0  |                   |   |   |                                                                                                                           |                    |          |                                                        |                                                                   |    |        |                 |
| the incidence of stress ulcer                   | 0.64(0.21 to 1.92)* | 3  | 118/236    | 0.0  |                   |   |   |                                                                                                                           |                    |          |                                                        |                                                                   |    |        |                 |
| the incidence of gastrointestinal complications | 0.29(0.24 to 0.36)  | 17 | 3169/6352  | 0.0  |                   |   |   |                                                                                                                           |                    |          |                                                        |                                                                   |    |        |                 |
| incidence of antibiotic-associated diarrhoea    | 0.63 (0.54 to 0.73) | 42 | 5985/11305 | 60.0 | GOODMAN 2021 [13] | C |   | probiotic                                                                                                                 | NP                 | All RCTs | adult population to whom antibiotics were administered | probiotics versus any control                                     | RR | Random | No serious bias |
|                                                 | 0.54 (0.38 to 0.76) | 4  | 324/651    | 0.0  |                   |   |   |                                                                                                                           |                    |          |                                                        | High dose vs low dose                                             |    |        |                 |
| incidence of antibiotic-associated diarrhoea    | 0.45 (0.36 to 0.56) | 33 | 6352       | 57.0 | GUO Q 2019 [14]   |   |   | specific, identified probiotic in any form (e.g. capsule, sachet, yogurt). Trials investigating non-specific probiotic or | 5 days to 12 weeks | All RCTs | children (0 to 18 years) receiving antibiotics         | Probiotic Versus Control (placebo or non-active control)          | RR | Random | No serious bias |

|                                                                               |                           |    |           |      |                     |   |                                                                                                   |                     |          |                                                                  |                                                                   |                      |        |                 |
|-------------------------------------------------------------------------------|---------------------------|----|-----------|------|---------------------|---|---------------------------------------------------------------------------------------------------|---------------------|----------|------------------------------------------------------------------|-------------------------------------------------------------------|----------------------|--------|-----------------|
|                                                                               | 0.37<br>(0.30 to 0.46)    | 20 | 4038      | NP   |                     |   | yogurt agents (e.g. products that do not label the probiotic strain and dose) were not considered |                     |          |                                                                  | Probiotic dose (≥5 billion CFUs of probiotics/day) Versus Control |                      |        |                 |
| Duration of diarrhea (days)                                                   | -0.91<br>(-1.38 to -0.44) | 8  | 1263      | 84.0 |                     |   |                                                                                                   | 10 days to 12 weeks |          |                                                                  | Probiotic Versus Control                                          | MD                   |        |                 |
| incidence of antibiotic-associated diarrhoea                                  | 0.58<br>(0.48 to 0.71)    | 30 | 3805/7023 | 58.0 | JAFARNEJAD 2016[15] | S | oral probiotic intake (in either supplements or foods)                                            | NP                  | All RCTs | individuals aged >18                                             | Probiotic Versus Control                                          | RR                   | random | No serious bias |
|                                                                               | 0.47<br>(0.40 to 0.56)    | 25 | 20873826  | 43.0 |                     |   |                                                                                                   |                     |          | adults (18–64 years)                                             |                                                                   |                      |        |                 |
|                                                                               | 0.94<br>(0.76 to 1.15)*   | 5  | 1718/3434 | 65.0 |                     |   |                                                                                                   |                     |          | the elderly (>65 years)                                          |                                                                   |                      |        |                 |
| the incidence of AAD                                                          | 0.49<br>(0.36 to 0.66)    | 17 | 1832/3611 | 58.0 | BLAABJERG 2017[16]  | S | Probiotics                                                                                        | NA                  | All RCTs | outpatients taking oral antibiotics                              | probiotics vs. Placebo or no treatment                            | RR                   | random | No serious bias |
|                                                                               | 0.49<br>(0.36 to 0.66)    | 4  | 590/1139  | 0.0  |                     |   | S. boulardii                                                                                      |                     |          |                                                                  |                                                                   |                      |        | NP              |
| Incidence of Antibiotic-Associated Diarrhea Using the Criteria Defined by WHO | 0.54<br>(0.36 to 0.82)    | 7  | 876/1724  | 27.0 |                     |   | Probiotics                                                                                        |                     |          |                                                                  |                                                                   |                      |        | NP              |
| the incidence of AAD                                                          | 0.42<br>(-0.23 to 0.77)   | 7  | 726/1446  | 76.0 |                     |   |                                                                                                   |                     |          | outpatients taking oral antibiotics, children (<15 years of age) |                                                                   | RD (risk difference) |        |                 |
|                                                                               | 0.42<br>(-0.23 to 0.77)   | 9  | 975/1936  | 47.0 |                     |   |                                                                                                   |                     |          | outpatients taking oral antibiotics, adults (>15 years of age)   |                                                                   |                      |        |                 |



|                                              |                        |    |      |      |               |   |   |                                       |                                      |          |                                      |                              |                                      |        |        |    |
|----------------------------------------------|------------------------|----|------|------|---------------|---|---|---------------------------------------|--------------------------------------|----------|--------------------------------------|------------------------------|--------------------------------------|--------|--------|----|
| Crohn's Disease                              | 1.06)*                 |    |      |      |               |   |   |                                       |                                      |          |                                      |                              |                                      |        |        |    |
| effect on persistence of symptoms            | 0.79 (0.68 to 0.91)    | 21 | 1931 | 72.0 | FORD 2018[20] | A | C | Combination probiotics                | Minimum treatment duration of 7 days | All RCTs | Adults (participants aged >16 years) | probiotics vs. Control group | RR                                   | random | 0.06   |    |
|                                              | 0.82 (0.63 to 1.06)*   | 8  | 893  | 83.0 |               |   |   | Lactobacillus                         | Minimum follow-up duration of 7 days |          |                                      |                              |                                      |        | NP     |    |
|                                              | 0.67 (0.51 to 0.87)    | 3  | 314  | 63.0 |               |   |   | Only Lactobacillus plantarum DSM 9843 |                                      |          |                                      |                              |                                      |        |        |    |
|                                              | 0.70 (0.48 to 1.01)*   | 3  | 528  | 72.0 |               |   |   | Bifidobacterium                       |                                      |          |                                      |                              |                                      |        |        |    |
| effect on global symptom or abdominal scores | -0.31 (-0.44 to -0.17) | 19 | 1341 | 24.0 |               |   |   | Combination probiotics                |                                      |          |                                      |                              | SMD                                  |        | 0.06   |    |
|                                              | -0.09 (-0.25 to 0.036) | 9  | 989  | 25.0 |               |   |   | Lactobacillus                         |                                      |          |                                      |                              |                                      |        | NP     |    |
|                                              | 0.12 (-0.27 to 0.50)*  | 4  | 388  | 70.0 |               |   |   | Saccharomyces                         |                                      |          |                                      |                              |                                      |        |        |    |
|                                              | -0.46 (-0.92 to 0.00)  | 3  | 501  | 77.0 |               |   |   | Bifidobacterium                       |                                      |          |                                      |                              |                                      |        |        |    |
| bloating scores                              | -0.15 (-0.31 to 0.01)* | 17 | 1155 | 36.0 |               |   |   | Combination probiotics                |                                      |          |                                      |                              |                                      |        |        |    |
|                                              | -0.30 (-0.68 to 0.09)* | 3  | 501  | 68.0 |               |   |   | Bifidobacterium                       |                                      |          |                                      |                              |                                      |        |        |    |
|                                              | -0.01 (-0.36 to 0.34)* | 3  | 209  | 40.0 |               |   |   | Saccharomyces                         |                                      |          |                                      |                              |                                      |        |        |    |
| flatulence symptom scores                    | -0.29 (-0.51 to -0.07) | 8  | 318  | 0.0  |               |   |   | Combination probiotics                |                                      |          |                                      |                              |                                      |        |        |    |
| global symptom scores                        | -0.23 (-0.44 to -0.02) | 17 | 2401 | 72.0 | ASHA 2020[21] | M | Z | Probiotics or prebiotics              | 2-24 weeks                           | All RCTs | adult patients (aged ≥18)            | IBS vs. Control              | Probiotics or prebiotics vs. Control | SMD    | random | NP |



|                             |      |                        |    |      |       |                                             |            |           |                                         |                                                                                        |                              |                                                  |                                                 |     |         |       |
|-----------------------------|------|------------------------|----|------|-------|---------------------------------------------|------------|-----------|-----------------------------------------|----------------------------------------------------------------------------------------|------------------------------|--------------------------------------------------|-------------------------------------------------|-----|---------|-------|
| abdominal scores            | pain | -0.18 (-0.43 to 0.07)* | 29 | 3688 | 92.0  | Probiotics or prebiotics or synbiotics      |            |           |                                         | years)                                                                                 | group                        |                                                  |                                                 |     |         |       |
|                             |      | -0.71 (-1.33 to -0.10) | 5  | 660  | NP    | probiotics containing Lactobacillus species |            |           |                                         |                                                                                        |                              |                                                  |                                                 |     |         |       |
| Abdominal score             | pain | -1.15 (-2.05 to -0.24) | 7  | 508  | 95.0  | XU H L 2021 [22]                            | probiotics | 4-8 weeks | All RCTs                                | Patients aged between 4 and 18 years with IBS met the diagnostic criteria (Rome II~IV) | probiotics vs. Control group | SMD                                              | rando m                                         | NP  |         |       |
| Abdominal treatment success | pain | 3.44 (1.73 to 6.87)    | 3  | 163  | 0.0   |                                             |            |           |                                         |                                                                                        | RR                           |                                                  |                                                 |     |         |       |
| Abdominal relief            | pain | 1.48 (0.96 to 2.28)*   | 3  | 167  | 40.0  |                                             |            |           |                                         |                                                                                        | RR                           |                                                  |                                                 |     |         |       |
| Frequency of abdominal pain | of   | -0.82 (-1.57 to -0.07) | 3  | 147  | 2.0   |                                             |            |           |                                         |                                                                                        | MD                           |                                                  |                                                 |     |         |       |
| Standard abdominal pain     |      | -0.15 (-0.27 to -0.04) | 6  | 508  | 94.0  |                                             |            |           |                                         |                                                                                        | MD                           |                                                  |                                                 |     |         |       |
| Abdominal pain              |      | 0.03 (-0.22 to 0.29)*  | 5  | 243  | 0.0   | CONNELL 2018[23]                            | M          | VSL#3     | 4-8 weeks                               | All RCTs                                                                               | IBS patient                  | VSL#3 placebo                                    | vs.                                             | SMD | fixed   | NP    |
| Stool consistency           |      | -0.00 (-0.09 to 0.08)* | 3  | 177  | 0.0   |                                             |            |           |                                         |                                                                                        |                              |                                                  |                                                 | MD  |         |       |
| Overall response            |      | 1.39 (0.98 to 1.96)*   | 3  | 177  | 0.0   |                                             |            |           |                                         |                                                                                        |                              |                                                  |                                                 | RR  |         |       |
| Abdominal bloating          |      | 0.15 (-0.11 to 0.40)*  | 5  | 243  | 5.0   |                                             |            |           |                                         |                                                                                        |                              |                                                  |                                                 | SMD |         |       |
| Quality of Life             |      | -0.08 (-0.39 to 0.22)* | 3  | 170  | 0.0   |                                             |            |           |                                         |                                                                                        |                              |                                                  |                                                 | SMD |         |       |
| Abdominal pain              |      | 0.25 (-0.27 to 0.77)*  | 3  | 554  | ≥ 50% | YUAN 2017[24]                               | F          | Q         | B. Infantis only                        | 4-8 weeks                                                                              | All RCTs                     | patients with IBS, age greater than 15 years old | Probiotics Including B. Infantis versus placebo | SMD | rando m | NP    |
|                             |      | 0.23 (-0.03 to         | 5  | 666  | ≥ 50% |                                             |            |           | B. Infantis only or composite probiotic |                                                                                        |                              |                                                  |                                                 |     |         | rando |

|                                                           |    |                              |    |      |       |                  |                                                                              |                                                       |          |                                                                                                                                                                                                        |                                             |     |            |                       |
|-----------------------------------------------------------|----|------------------------------|----|------|-------|------------------|------------------------------------------------------------------------------|-------------------------------------------------------|----------|--------------------------------------------------------------------------------------------------------------------------------------------------------------------------------------------------------|---------------------------------------------|-----|------------|-----------------------|
|                                                           |    | 0.49)*                       |    |      |       |                  | Including B. Infantis                                                        |                                                       |          |                                                                                                                                                                                                        |                                             |     | m          |                       |
| Bloating/distention                                       |    | 0.20<br>(-0.19 to<br>0.58)*  | 3  | 554  | ≥ 50% |                  | B. Infantis only                                                             |                                                       |          |                                                                                                                                                                                                        |                                             |     | Fixed      |                       |
|                                                           |    | 0.21<br>(0.07 to<br>0.35)    | 5  | 666  | ≤ 50% |                  | B. Infantis only or<br>composite probiotic<br>Including B. Infantis          |                                                       |          |                                                                                                                                                                                                        |                                             |     | fixed      |                       |
| Bowel habit<br>satisfaction                               |    | 0.66<br>(-0.11 to<br>1.43)*  | 3  | 554  | ≥ 50% |                  | B. Infantis only                                                             |                                                       |          |                                                                                                                                                                                                        |                                             |     | rando<br>m |                       |
| stool frequency                                           |    | 1.29<br>(0.69 to<br>1.89)*   | 10 | 1039 | 90.0  | WEN Y 2020 [25]  | Any<br>species/strains/dose/treat<br>ment regimen of live<br>probiotics      | 2-12 weeks                                            | All RCTs | Adult<br>populations<br>aged ≥16 y<br>with<br>functional<br>chronic<br>constipation<br>defined by<br>clinical<br>symptoms,<br>a<br>physician's<br>opinion, or<br>the Rome I,<br>II, or III<br>criteria | probiotics<br>vs. placebo                   | MD  | rando<br>m | 0.183                 |
| Effect of probiotics<br>on stool consistency<br>for IBS-C |    | 0.55<br>(0.27 to<br>0.82)    | 9  | NP   | 80.0  |                  |                                                                              |                                                       |          |                                                                                                                                                                                                        |                                             | SMD |            | 0.583                 |
|                                                           |    | 0.46<br>(0.08 to<br>0.85)    | 4  | NP   | NP    |                  | B. lactis                                                                    |                                                       |          |                                                                                                                                                                                                        |                                             |     |            | NP                    |
| Satisfaction in relief                                    |    | 0.95<br>(0.77 to<br>1.18)*   | 3  | 315  |       |                  | Any<br>species/strains/dose/treat<br>ment regimen of live<br>probiotics      |                                                       |          |                                                                                                                                                                                                        |                                             | RR  | fixed      |                       |
| Bloating                                                  |    | -0.77<br>(-1.46 to<br>-0.07) | 4  | 460  |       |                  |                                                                              |                                                       |          |                                                                                                                                                                                                        |                                             | SMD | rando<br>m |                       |
| Flatulence                                                |    | -0.34<br>(-0.70 to<br>0.02)* | 3  | 158  |       |                  |                                                                              |                                                       |          |                                                                                                                                                                                                        |                                             |     | fixed      |                       |
| Incomplete<br>evacuation                                  |    | -0.77<br>(-1.14 to<br>-0.39) | 6  | 502  |       |                  |                                                                              |                                                       |          |                                                                                                                                                                                                        |                                             |     | rando<br>m |                       |
| Hard stools                                               |    | -0.74<br>(-1.19 to<br>-0.28) | 5  | 280  |       |                  |                                                                              |                                                       |          |                                                                                                                                                                                                        |                                             |     |            |                       |
| Ease of expulsion                                         |    | 0.81<br>(0.15 to<br>1.48)    | 4  | 392  |       |                  |                                                                              |                                                       |          |                                                                                                                                                                                                        |                                             |     |            |                       |
| incidence<br>diarrhea                                     | of | 0.51<br>(0.37 to<br>0.70)    | 4  | 404  | 0.0   | WU X D 2018 [26] | prophylactic probiotics<br>in combination with<br>antibiotics preoperatively | Preoperation 1-14<br>days, postoperation<br>0-14 days | All RCTs | adult<br>patients<br>who                                                                                                                                                                               | Vs. placebo<br>or other base<br>ingredients | RR  | rando<br>m | No<br>serious<br>bias |

[illegible]

|                                                 |                        |        |      |      |                    |   |                                                                        |                                                                        |          |                                                                      |                                                                                   |     |        |                 |  |
|-------------------------------------------------|------------------------|--------|------|------|--------------------|---|------------------------------------------------------------------------|------------------------------------------------------------------------|----------|----------------------------------------------------------------------|-----------------------------------------------------------------------------------|-----|--------|-----------------|--|
|                                                 |                        | 0.06)* |      |      |                    |   |                                                                        |                                                                        |          |                                                                      | clinical symptoms, pediatric physicians, or the Rome I, II, or III criteria       |     |        |                 |  |
| eradication of H. pylori                        | 7.91 (2.97 to 21.05)   | 6      | 352  | 0.0  | LOSURDO 2018[31]   | G | probiotic supplementation                                              | NP                                                                     | All RCTs | H. pylori-infected patients                                          | Vs. placebo                                                                       | OR  | fixed  | 0.02            |  |
| oropharyngeal colonization                      | 0.87 (0.76 to 0.99)    | 6      | 915  | 0.0  | JIT 2020[32]       |   | probiotic                                                              | NP                                                                     | All RCTs | adults who received mechanical ventilation (MV) therapy in hospitals | Vs. control                                                                       | RR  | fixed  | NP              |  |
| gastric colonization                            | 0.65 (0.49 to 0.84)    | 4      | 519  | 30.2 |                    |   |                                                                        |                                                                        |          |                                                                      |                                                                                   |     | fixed  |                 |  |
| rate of gram-negative (GN) bacteria positivity  | 0.58 (0.58 to 0.86)    | 9      | 1247 | 60.0 |                    |   |                                                                        |                                                                        |          |                                                                      |                                                                                   |     | random |                 |  |
| positive rate of gram-positive bacteria culture | 0.95 (0.67 to 1.35)*   | 8      | 1175 | 31.3 |                    |   |                                                                        |                                                                        |          |                                                                      |                                                                                   |     | fixed  |                 |  |
| positive fungal culture rates                   | 0.98 (0.67 to 1.43)*   | 7      | 886  | 26.5 |                    |   |                                                                        |                                                                        |          |                                                                      |                                                                                   |     | fixed  |                 |  |
| the incidence of diarrhea                       | 0.69 (0.47 to 1.02)*   | 8      | 1219 | 59.4 |                    |   |                                                                        |                                                                        |          |                                                                      |                                                                                   |     | random |                 |  |
| fecal zonulin                                   | -0.63 (-1.17 to -0.08) | 3      | NP   | 79.4 | ASHABI A 2020 [33] |   | probiotics (supplement or food)                                        | 2-20 weeks                                                             | All RCTs | athletes                                                             | Vs. control                                                                       | SMD | random | 0.19            |  |
| Stool pH                                        | -0.65 (-0.76 to -0.54) | 6      | 470  | 81.0 | RAO S 2009[34]     |   | combination of prebiotics and probiotics vs controls                   | NP                                                                     | All RCTs | full-term neonates                                                   | formula had different composition vs. the control formula (apart from prebiotics) | WMD | fixed  | No serious bias |  |
| Diarrheal episodes                              | 0.71 (0.35 to 1.43)*   | 3      | 606  | 99.0 | LOHNER 2014[35]    | S | prebiotics added to food in the manufacturing process or as a separate | a supplementation time of at least 2 months and an observation time of | All RCTs | healthy infants or children, aged 0–18                               | Vs. control (placebo or no                                                        | RR  | random | NP              |  |

|                                     |         |                              |    |           |      | supplement)           | at least 4 months |                     |            | years    | supplemen-<br>tation)                                                                                                                           |                           |    |            |                       |
|-------------------------------------|---------|------------------------------|----|-----------|------|-----------------------|-------------------|---------------------|------------|----------|-------------------------------------------------------------------------------------------------------------------------------------------------|---------------------------|----|------------|-----------------------|
| overall<br>response<br>to treatment | symptom | 0.62<br>(0.07 to<br>5.69)*   | 3  | 191       | 91.0 | WILSON<br>2019[36]    | B                 | prebiotics          | 2-12 weeks | All RCTs | Adult<br>patients ≥18<br>and ≤64 y<br>with<br>Irritable<br>bowel<br>syndrome<br>(IBS) or<br>other<br>Functional<br>bowel<br>disorders<br>(FBDs) | vs. placebo               | OR | rando<br>m | No<br>serious<br>bias |
| integrative<br>score                | symptom | -0.39<br>(-1.43 to<br>0.64)* | 8  | NP        | 97.0 |                       |                   |                     |            |          |                                                                                                                                                 | SMD                       |    |            |                       |
| severity<br>of abdominal<br>pain    |         | -0.83<br>(-1.84 to<br>0.18)* | 10 |           | 97.0 |                       |                   |                     |            |          |                                                                                                                                                 |                           |    |            |                       |
| bloating                            |         | -0.57<br>(-1.67 to<br>0.52)* | 9  |           | 97.0 |                       |                   |                     |            |          |                                                                                                                                                 |                           |    |            |                       |
| flatulence                          |         | -0.53<br>(-2.04 to<br>0.98)* | 6  |           | 98.0 |                       |                   |                     |            |          |                                                                                                                                                 |                           |    |            |                       |
| necrotizing<br>enterocolitis        |         | 0.79<br>(0.14 to<br>1.44)*   | 6  | 737       | 21.0 | CHI C 2019[37]        |                   | prebiotics          | 7-57 days  | All RCTs | low birth<br>weight<br>infants<br>(<2500 g) or<br>preterm<br>infants (<36<br>weeks)                                                             | vs. placebo               | RR | rando<br>m | 0.73                  |
| feeding intolerance                 |         | 0.87<br>(0.52 to<br>1.45)*   | 4  | 413       | 0.0  |                       |                   |                     |            |          |                                                                                                                                                 |                           |    |            | NA                    |
| full enteral feeding                |         | -0.99<br>(-1.15 to<br>-0.83) | 7  | 576       | 0.0  |                       |                   |                     |            |          |                                                                                                                                                 |                           |    |            | 0.63                  |
| stool frequency                     |         | 0.52<br>(0.30 to<br>0.73)    | 6  | 294       | 13.0 |                       |                   |                     |            |          |                                                                                                                                                 |                           |    |            | 0.32                  |
| Clinical remission                  |         | 1.21<br>(1.18 to<br>1.24)    | 45 | 1816/3624 | NP   | Sohail G 2018[38]     |                   | probiotic Medilac-S | 4-96 weeks | All RCTs | human                                                                                                                                           | Vs. control               | RR | fixed      | No<br>serious<br>bias |
| Endoscopy scores                    |         | 0.71<br>(0.35 to<br>1.07)    | 7  | 270       |      |                       |                   |                     |            |          |                                                                                                                                                 |                           | MD | rando<br>m |                       |
| Histological scores                 |         | 1.07<br>(0.92 to<br>1.23)    | 8  | 501       |      |                       |                   |                     |            |          |                                                                                                                                                 |                           | MD | fixed      |                       |
| incidence of<br>Hirschsprung-associ |         | 0.72<br>(0.37 to             | 5  | 93/198    | 37.0 | NAKAMURA<br>2018 [39] | H                 | probiotics          | NP         | NP       | premature<br>infants                                                                                                                            | Probiotics<br>vs. control | OR | fixed      | NP                    |

[illegible]

\* No statistical significance; CI, confidence interval; RCT, randomized controlled trial; RR, relative risk; HR, hazard ratio; MD, mean difference; SMD, standard mean difference; WMD, weighted mean difference; OR, odds ratio; NA, not available; NP, not published.

## References

1. Goldenberg, J.Z.; Yap, C.; Lytvyn, L.; Lo, C.K.; Beardsley, J.; Mertz, D.; Johnston, B.C. Probiotics for the prevention of *Clostridium difficile*-associated diarrhea in adults and children. *Cochrane Db. Syst. Rev.* **2017**, 2017, D6095, doi: 10.1002/14651858.CD006095.pub4.
2. Wu, Z.J.; DU X; Zheng, J. Role of *Lactobacillus* in the prevention of *Clostridium difficile*-associated diarrhea: a meta-analysis of randomized controlled trials. *Chin Med J (Engl)* **2013**, 126, 4154-4161.
3. Shen, N.T.; Maw, A.; Tmanova, L.L.; Pino, A.; Ancy, K.; Crawford, C.V.; Simon, M.S.; Evans, A.T. Timely Use of Probiotics in Hospitalized Adults Prevents *Clostridium difficile* Infection: A Systematic Review With Meta-Regression Analysis. *Gastroenterology* **2017**, 152, 1889-1900, doi: 10.1053/j.gastro.2017.02.003.
4. Johnston, B.C.; Ma, S.S.Y.; Goldenberg, J.Z.; Thorlund, K.; Vandvik, P.O.; Loeb, M.; Guyatt, G.H. Probiotics for the Prevention of *Clostridium difficile* Associated Diarrhea. *Ann. Intern. Med.* **2012**, 157, 878, doi: 10.7326/0003-4819-157-12-201212180-00563.
5. Dang, X.; Xu, M.; Liu, D.; Zhou, D.; Yang, W. Assessing the efficacy and safety of fecal microbiota transplantation and probiotic VSL#3 for active ulcerative colitis: A systematic review and meta-analysis. *PLoS One* **2020**, 15, e228846, doi: 10.1371/journal.pone.0228846.
6. Kaur, L.; Gordon, M.; Baines, P.A.; Iheozor-Ejiofor, Z.; Sinopoulou, V.; Akobeng, A.K. Probiotics for induction of remission in ulcerative colitis. *Cochrane Db. Syst. Rev.* **2020**, 2020, D5573, doi: 10.1002/14651858.CD005573.pub3.
7. Rufino, M.N.; Da Costa, A.L.; Jorge, E.N.; Paiano, V.F.; Camparoto, M.L.; Keller, R.; Bremer-Neto, H. Synbiotics improve clinical indicators of ulcerative colitis: systematic review with meta-analysis. *Nutr. Rev.* **2022**, 80, 157-164, doi: 10.1093/nutrit/nuab017.
8. Peng, L.; Zhong, Y.; Wang, A.; Jiang, Z. Probiotics combined with aminosalicilic acid affiliates remission of ulcerative colitis: a meta-analysis of randomized controlled trial. *Bioscience Rep.* **2019**, 39, doi: 10.1042/BSR20180943.
9. Losurdo, G.; Iannone, A.; Contaldo, A.; Ierardi, E.; Di Leo, A.; Principi, M. *Escherichia coli* Nissle 1917 in Ulcerative Colitis Treatment: Systematic Review and Meta-analysis. *J. Gastrointest. Liver* **2020**, 24, 499-505, doi: 10.15403/jgld.2014.1121.244.ecn.
10. Iheozor-Ejiofor, Z.; Kaur, L.; Gordon, M.; Baines, P.A.; Sinopoulou, V.; Akobeng, A.K. Probiotics for maintenance of remission in ulcerative colitis. *Cochrane Db. Syst. Rev.* **2020**, 3, D7443, doi: 10.1002/14651858.CD007443.pub3.
11. Astó, E.; Méndez, I.; Audivert, S.; Farran-Codina, A.; Espadaler, J. The Efficacy of Probiotics, Prebiotic Inulin-Type Fructans, and Synbiotics in Human Ulcerative Colitis: A Systematic Review and Meta-Analysis. *Nutrients* **2019**, 11, 293, doi: 10.3390/nu11020293.
12. Chen, X.; Hu, Y.; Yuan, X.; Yang, J.; Ka, L. Effect of early enteral nutrition combined with probiotics in patients with stroke: a meta-analysis of randomized controlled trials. *Eur. J. Clin. Nutr.* **2022**, 76, 592-603, doi: 10.1038/s41430-021-00986-3.
13. Goodman, C.; Keating, G.; Georgousopoulou, E.; Hespe, C.; Levett, K. Probiotics for the prevention of antibiotic-associated diarrhoea: a systematic review and meta-analysis. *BMJ Open* **2021**, 11, e43054, doi: 10.1136/bmjopen-2020-043054.

14. Guo, Q.; Goldenberg, J.Z.; Humphrey, C.; Dib, R.E.; Johnston, B. PROBIOTICS FOR THE PREVENTION OF PEDIATRIC ANTIBIOTIC-ASSOCIATED DIARRHEA. *Gastroenterology* **2019**, *156*, 220, doi: 10.1016/S0016-5085%2819%2937348-2.
15. Jafarnejad, S.; Shab-Bidar, S.; Speakman, J.R.; Parastui, K.; Daneshi-Maskooni, M.; Djafarian, K. Probiotics Reduce the Risk of Antibiotic-Associated Diarrhea in Adults (18–64 Years) but Not the Elderly (>65 Years). *Nutr. Clin. Pract.* **2016**, *31*, 502-513, doi: 10.1177/0884533616639399.
16. Blaabjerg, S.; Artzi, D.; Aabenhus, R. Probiotics for the Prevention of Antibiotic-Associated Diarrhea in Outpatients—A Systematic Review and Meta-Analysis. *Antibiotics* **2017**, *6*, 21, doi: 10.3390/antibiotics6040021.
17. Zhang, X.; Guan, X.; Tang, Y.; Sun, J.; Wang, X.; Wang, W.; Fan, J. Clinical effects and gut microbiota changes of using probiotics, prebiotics or synbiotics in inflammatory bowel disease: a systematic review and meta-analysis. *Eur. J. Nutr.* **2021**, *60*, 2855-2875, doi: 10.1007/s00394-021-02503-5.
18. Derwa, Y.; Gracie, D.J.; Hamlin, P.J.; Ford, A.C. Systematic review with meta-analysis: the efficacy of probiotics in inflammatory bowel disease. *Aliment. Pharm. Ther.* **2017**, *46*, 389-400, doi: 10.1111/apt.14203.
19. Pabón-Carrasco, M.; Ramirez-Baena, L.; Vilar-Palomo, S.; Castro-Méndez, A.; Martos-García, R.; Rodríguez-Gallego, I. Probiotics as a Coadjuvant Factor in Active or Quiescent Inflammatory Bowel Disease of Adults—A Meta-Analytical Study. *Nutrients* **2020**, *12*, 2628, doi: 10.3390/nu12092628.
20. Ford, A.C.; Harris, L.A.; Lacy, B.E.; Quigley, E.M.M.; Moayyedi, P. Systematic review with meta-analysis: the efficacy of prebiotics, probiotics, synbiotics and antibiotics in irritable bowel syndrome. *Aliment. Pharm. Ther.* **2018**, *48*, 1044-1060, doi: 10.1111/apt.15001.
21. Asha, M.Z.; Khalil, S.F.H. Efficacy and Safety of Probiotics, Prebiotics and Synbiotics in the Treatment of Irritable Bowel Syndrome: A systematic review and meta-analysis. *Sultan Qaboos University Medical Journal [SQUMJ]* **2020**, *20*, 13-24, doi: 10.18295/squmj.2020.20.01.003.
22. Xu, H.; Zou, L.; Chen, M.; Wang, H.; Shen, W.; Zheng, Q.; Cui, W. Efficacy of probiotic adjuvant therapy for irritable bowel syndrome in children: A systematic review and meta-analysis. *PLoS One* **2021**, *16*, e255160, doi: 10.1371/journal.pone.0255160.
23. Connell, M.; Shin, A.; James-Stevenson, T.; Xu, H.; Imperiale, T.F.; Herron, J. Systematic review and meta-analysis: Efficacy of patented probiotic, VSL#3, in irritable bowel syndrome. *Neurogastroenterology & Motility* **2018**, *30*, e13427, doi: 10.1111/nmo.13427.
24. Yuan, F.; Ni, H.; Asche, C.V.; Kim, M.; Walayat, S.; Ren, J. Efficacy of *Bifidobacterium infantis* 35624 in patients with irritable bowel syndrome: a meta-analysis. *Curr. Med. Res. Opin.* **2017**, *33*, 1191-1197, doi: 10.1080/03007995.2017.1292230.
25. Wen, Y.; Li, J.; Long, Q.; Yue, C.; He, B.; Tang, X. The efficacy and safety of probiotics for patients with constipation-predominant irritable bowel syndrome: A systematic review and meta-analysis based on seventeen randomized controlled trials. *Int. J. Surg.* **2020**, *79*, 111-119, doi: 10.1016/j.ijso.2020.04.063.
26. Wu, X.; Xu, W.; Liu, M.; Hu, K.; Sun, Y.; Yang, X.; Zhu, G.; Wang, Z.; Huang, W. Efficacy of prophylactic probiotics in combination with antibiotics versus antibiotics alone for colorectal surgery: A meta-analysis of randomized controlled trials. *J. Surg. Oncol.* **2018**, *117*, 1394-1404, doi: 10.1002/jso.25038.
27. Zhong, C.; Qu, C.; Wang, B.; Liang, S.; Zeng, B. Probiotics for Preventing and Treating Small Intestinal Bacterial Overgrowth. *J. Clin. Gastroenterol.* **2017**, *51*, 300-311, doi: 10.1097/MCG.0000000000000814.
28. Zhang, X.; Chen, M.; Geng, S.; Yu, J.; Kuang, Y.; Luo, H.; Wang, K. Effects of Probiotics on Diarrhea and CD4 Cell Count in People Living With HIV: A Systematic Review and Meta-Analysis. *Frontiers in Pharmacology* **2021**, *12*, 570520, doi: 10.3389/fphar.2021.570520.
29. Zhang, C.; Jiang, J.; Tian, F.; Zhao, J.; Zhang, H.; Zhai, Q.; Chen, W. Meta-analysis of randomized controlled trials of the effects of probiotics on functional constipation in adults. *Clin. Nutr.* **2020**, *39*, 2960-2969, doi: 10.1016/j.clnu.2020.01.005.



30. Huang, R.; Hu, J. Positive Effect of Probiotics on Constipation in Children: A Systematic Review and Meta-Analysis of Six Randomized Controlled Trials. *Front. Cell. Infect. Mi.* **2017**, *7*, 153, doi: 10.3389/fcimb.2017.00153.
31. Losurdo, G.; Cubisino, R.; Barone, M.; Principi, M.; Leandro, G.; Ierardi, E.; Leo, A.D. Probiotic monotherapy and *Helicobacter pylori* eradication: A systematic review with pooled-data analysis. *World J. Gastroentero.* **2018**, *24*, 139-149, doi: 10.3748/wjg.v24.i1.139.
32. Ji, T.; Zhu, X.; Shang, F.; Zhang, X. Preventive Effect of Probiotics on Ventilator-Associated Pneumonia: A Meta-analysis of 2428 Patients. *Ann. Pharmacother.* **2021**, *55*, 949-962, doi: 10.1177/1060028020983021.
33. As Habi, A.; Nazari, M.; Hajianfar, H.; Arab, A.; Faghfoori, Z. A systematic review and meta-analysis of probiotic consumption and metabolic status of athletes. *Int. J. Food Prop.* **2020**, *23*, 941-954, doi: 10.1080/10942912.2020.1772286.
34. Rao, S.; Srinivasjois, R.; Patole, S. Prebiotic Supplementation in Full-term Neonates. *Archives of Pediatrics & Adolescent Medicine* **2009**, *163*, 755-764, doi: 10.1001/archpediatrics.2009.94.
35. Lohner, S.; Küllenberg, D.; Antes, G.; Decsi, T.; Meerpohl, J.J. Prebiotics in healthy infants and children for prevention of acute infectious diseases: a systematic review and meta-analysis. *Nutr. Rev.* **2014**, *72*, 523-531, doi: 10.1111/nure.12117.
36. Wilson, B.; Rossi, M.; Dimidi, E.; Whelan, K. Prebiotics in irritable bowel syndrome and other functional bowel disorders in adults: a systematic review and meta-analysis of randomized controlled trials. *The American Journal of Clinical Nutrition* **2019**, *109*, 1098-1111, doi: 10.1093/ajcn/nqy376.
37. Chi, C.; Buys, N.; Li, C.; Sun, J.; Yin, C. Effects of prebiotics on sepsis, necrotizing enterocolitis, mortality, feeding intolerance, time to full enteral feeding, length of hospital stay, and stool frequency in preterm infants: a meta-analysis. *Eur. J. Clin. Nutr.* **2019**, *73*, 657-670, doi: 10.1038/s41430-018-0377-6.
38. Sohail, G.; Xu, X.; Christman, M.C.; Tompkins, T.A. Probiotic Medilac-S® for the induction of clinical remission in a Chinese population with ulcerative colitis: A systematic review and meta-analysis. *World Journal of Clinical Cases* **2018**, *6*, 961-984, doi: 10.12998/wjcc.v6.i15.961.
39. Nakamura, H.; Lim, T.; Puri, P. Probiotics for the prevention of Hirschsprung-associated enterocolitis: a systematic review and meta-analysis. *Pediatr. Surg. Int.* **2018**, *34*, 189-193, doi: 10.1007/s00383-017-4188-y.
40. Miller, L.E.; Zimmermann, A.K.; Ouwehand, A.C. Contemporary meta-analysis of short-term probiotic consumption on gastrointestinal transit. *World J. Gastroentero.* **2016**, *22*, 5122, doi: 10.3748/wjg.v22.i21.5122.
41. Seiler, C.L.; Kiflen, M.; Stefanolo, J.P.; Bai, J.C.; Bercik, P.; Kelly, C.P.; Verdu, E.F.; Moayyedi, P.; Pinto-Sanchez, M.I. Probiotics for Celiac Disease: A Systematic Review and Meta-Analysis of Randomized Controlled Trials. *Am. J. Gastroenterol.* **2020**, *115*, 1584-1595, doi: 10.14309/ajg.0000000000000749.
42. Zhang, J.; Wu, H.M.; Wang, X.; Xie, J.; Li, X.; Ma, J.; Wang, F.; Tang, X. Efficacy of prebiotics and probiotics for functional dyspepsia. *Medicine* **2020**, *99*, e19107, doi: 10.1097/MD.00000000000019107.
43. Sorensen, K.; Cawood, A.L.; Gibson, G.R.; Cooke, L.H.; Stratton, R.J. Amino Acid Formula Containing Synbiotics in Infants with Cow's Milk Protein Allergy: A Systematic Review and Meta-Analysis. *Nutrients* **2021**, *13*, 935, doi: 10.3390/nu13030935.
