# Supplementary material for: Gastrointestinal Microbiome and Multiple Health Outcomes: Umbrella Review
Source: MDPI journal article supplement (doi:10.3390/nu14183726), 2022-09-09
Supplement: s1 [file s1]

[illegible]

[illegible]

[illegible]

[illegible]

| index                                        |  |                                |   |     |      |  | on any hypoglycemic agents |                        |    |
|----------------------------------------------|--|--------------------------------|---|-----|------|--|----------------------------|------------------------|----|
| total cholesterol level                      |  | -3.60 (-16.26 to 9.07) mg/dL   | 4 | 265 | 39.0 |  |                            |                        |    |
| high-density lipoprotein cholesterol         |  | -1.25 (-5.48 to 2.99) mg/dL    | 4 | 265 | 59.0 |  |                            |                        |    |
| low-density lipoprotein cholesterol level    |  | -6.36 (-14.89 to 2.16) mg/dL   | 4 | 265 | 0.0  |  |                            |                        |    |
| triglycerides levels                         |  | -10.40 (-24.68 to 3.89)mg/dL   | 4 | 265 | 0.0  |  |                            |                        |    |
| high-sensitivity C-reactive protein (hs-CRP) |  | -1.37 (-1.94 to -0.81) mg/L    | 4 | 275 | 24.0 |  |                            |                        |    |
| nitric oxide (NO)                            |  | 2.42 (0.80 to 4.04) μmol/L     | 3 | 165 | 0.0  |  |                            |                        |    |
| malondialdehyde (MDA)                        |  | -0.77 (-0.99 to -0.56) μmol/L  | 4 | 221 | 0.0  |  |                            |                        |    |
| glutathione (GSH)                            |  | 13.73 (-35.84 to 63.31) μmol/L | 3 | 165 | 48.0 |  |                            |                        |    |
| total antioxidant capacity (TAC)             |  | 93.46 (-7.31 to 194.22) mmol/L | 3 | 165 | 78.0 |  |                            |                        |    |
| incidence of pre-eclampsia                   |  | 0.89 (0.32 to 2.46)            | 3 | 217 | 0.0  |  |                            | probiotics vs. control | OR |
| gestational age at delivery                  |  | 0.04 (-0.30 to 0.38) week      | 4 | 301 | 0.0  |  |                            | probiotics vs. placebo | MD |
| the likelihood of cesarean delivery          |  | 0.66 (0.34 to 1.29)*           | 4 | 301 | 39.0 |  |                            |                        | OR |
| macrosomia                                   |  | 0.42 (0.19                     | 5 | 361 | 12.0 |  |                            |                        |    |

[illegible]

\* No statistical significance; CI, confidence interval; RCT, randomized controlled trial; RR, relative risk; HR, hazard ratio; MD, mean

difference; SMD, standard mean difference; WMD, weighted mean difference; OR, odds ratio; NA, not available; NP, not published.



## References

1. Ong, T.G.; Gordon, M.; Banks, S.S.; Thomas, M.R.; Akobeng, A.K. Probiotics to prevent infantile colic. *Cochrane Db. Syst. Rev.* **2019**, doi: 10.1002/14651858.CD012473.pub2.
2. Skonieczna-żydecka, K.; Janda, K.; Kaczmarczyk, M.; Marlicz, W.; Ióniewski, I.; Ióniewska, B. The Effect of Probiotics on Symptoms, Gut Microbiota and Inflammatory Markers in Infantile Colic: A Systematic Review, Meta-Analysis and Meta-Regression of Randomized Controlled Trials. *Journal of Clinical Medicine* **2020**, *9*, 999, doi: 10.3390/jcm9040999.
3. Upadhyay, R.P.; Taneja, S.; Chowdhury, R.; Strand, T.A.; Bhandari, N. Effect of prebiotic and probiotic supplementation on neurodevelopment in preterm very low birth weight infants: findings from a meta-analysis. *Pediatr. Res.* **2020**, *87*, 811-822, doi: 10.1038/s41390-018-0211-9.
4. Sharif, S.; Meader, N.; Oddie, S.J.; Rojas-Reyes, M.X.; McGuire, W. Probiotics to prevent necrotising enterocolitis in very preterm or very low birth weight infants. *Cochrane Db. Syst. Rev.* **2020**, 2020, D5496, doi: 10.1002/14651858.CD005496.pub5.
5. Yang, Y.; Guo, Y.; Kan, Q.; Zhou, X.G.; Zhou, X.Y.; Li, Y. A meta-analysis of probiotics for preventing necrotizing enterocolitis in preterm neonates. *Braz. J. Med. Biol. Res.* **2014**, *47*, 804-810, doi: 10.1590/1414-431X20143857.
6. Jiang, T.; Zhang, H.; Xu, X.; Li, H.; Yang, J. Mixed probiotics decrease the incidence of stage II-III necrotizing enterocolitis and death: A systematic review and meta-analysis. *Microb. Pathogenesis* **2020**, *138*, 103794, doi: 10.1016/j.micpath.2019.103794.
7. Nakamura, H.; Lim, T.; Puri, P. Probiotics for the prevention of Hirschsprung-associated enterocolitis: a systematic review and meta-analysis. *Pediatr. Surg. Int.* **2018**, *34*, 189-193, doi: 10.1007/s00383-017-4188-y.
8. Liu, D.; Shao, L.; Zhang, Y.; Kang, W. Safety and efficacy of Lactobacillus for preventing necrotizing enterocolitis in preterm infants. *Int. J. Surg.* **2020**, *76*, 79-87, doi: 10.1016/j.ijssu.2020.02.031.
9. Zhu, X.; Tang, X.; Qu, F.; Zheng, Y.; Zhang, W.; Diao, Y. Bifidobacterium may benefit the prevention of necrotizing enterocolitis in preterm infants: A systematic review and meta-analysis. *Int. J. Surg.* **2019**, *61*, 17-25, doi: 10.1016/j.ijssu.2018.11.026.
10. Sung, V.; Collett, S.; de Gooyer, T.; Hiscock, H.; Tang, M.; Wake, M. Probiotics to Prevent or Treat Excessive Infant Crying. *JAMA Pediatr.* **2013**, *167*, 1150, doi: 10.1001/jamapediatrics.2013.2572.
11. Grev, J.; Berg, M.; Soll, R. Maternal probiotic supplementation for prevention of morbidity and mortality in preterm infants. *Cochrane Db. Syst. Rev.* **2018**, 2018, D12519, doi: 10.1002/14651858.CD012519.pub2.
12. Wang, C.; Tung, Y.; Chang, H.; Lin, C.; Chen, Y. Effect of Probiotic Supplementation on Newborn Birth Weight for Mother with Gestational Diabetes Mellitus or Overweight/Obesity: A Systematic Review and Meta-Analysis. *Nutrients* **2020**, *12*, 3477, doi: 10.3390/nu12113477.
13. Han, M.; Sun, J.; Su, X.; Peng, Y.; Goyal, H.; Wu, C.; Zhu, X.; Li, L. Probiotics improve glucose and lipid metabolism in pregnant women: a meta-analysis. *Annals of Translational Medicine* **2019**, *7*, 99, doi: 10.21037/atm.2019.01.61.
14. Davidson, S.J.; Barrett, H.L.; Price, S.A.; Callaway, L.K.; Dekker Nitert, M. Probiotics for preventing gestational diabetes. *Cochrane Db. Syst. Rev.* **2021**, 2021, D9951, doi: 10.1002/14651858.CD009951.pub3.
15. Hasain, Z.; Che Roos, N.A.; Rahmat, F.; Mustapa, M.; Raja Ali, R.A.; Mokhtar, N.M. Diet and Pre-Intervention Washout Modifies the Effects of Probiotics on Gestational Diabetes Mellitus: A Comprehensive Systematic Review and Meta-Analysis of Randomized Controlled Trials. *Nutrients* **2021**, *13*, 3045, doi: 10.3390/nu13093045.

16. Sun, M.; Luo, J.; Liu, H.; Xi, Y.; Lin, Q. Can Mixed Strains of Lactobacillus and Bifidobacterium Reduce Eczema in Infants under Three Years of Age? A Meta-Analysis. *Nutrients* **2021**, *13*, 1461, doi: 10.3390/nu13051461.
17. Szajewska, H.; Horvath, A. Lactobacillus rhamnosus GG in the Primary Prevention of Eczema in Children: A Systematic Review and Meta-Analysis. *Nutrients* **2018**, *10*, 1319, doi: 10.3390/nu10091319.
