# Supplementary material for: Gastrointestinal Microbiome and Multiple Health Outcomes: Umbrella Review
Source: Nutrients. 2022 Sep 9;14(18):3726. doi: 10.3390/nu14183726 (PMC9505003; doi:10.3390/nu14183726)
Supplement: Supplementary file 1 [file nutrients-14-03726-s001.zip]

Archive with 13 entries (13 files):
- Supplementary Table S1.pdf
- Supplementary Table S10.pdf
- Supplementary Table S11.pdf
- Supplementary Table S12 AMSTAR2.xlsx
- Supplementary Table S13 GRADE.xlsx
- Supplementary Table S2.pdf
- Supplementary Table S3.pdf
- Supplementary Table S4.pdf
- Supplementary Table S5.pdf
- Supplementary Table S6.pdf
- Supplementary Table S7.pdf
- Supplementary Table S8.pdf
- Supplementary Table S9.pdf
