# Supplementary material for: Gastrointestinal Microbiome and Multiple Health Outcomes: Umbrella Review
Source: Nutrients. 2022 Sep 9;14(18):3726. doi: 10.3390/nu14183726 (PMC9505003; doi:10.3390/nu14183726)
Supplement: Supplementary file 1 [file nutrients-14-03726-s001.zip › Supplementary Table S12 AMSTAR2.xlsx]

## Sheet: Sheet1
If there is no or only one non-critical item is considered as N, the meta-analysis is rated as highly reliable. If more than one non-critical item is rated as nonconformance, the analysis is considered to have medium credibility. If the analysis does not meet one key item regardless of whether it meets any non-key item, it is rated as low reliability. If more than one key item does not meet the c…
STUDY	1	2*	3	4*	5	6	7*	8	9*	10	11*	12	13*	14	15*	16	overall confidence
BESERRA B 2015	Y	PY	Y	PY	Y	Y	N	Y	PY	N	Y	N	Y	Y	Y	Y	LOW
PARK S 2015	Y	PY	Y	PY	Y	Y	N	Y	PY	N	Y	Y	Y	Y	Y	N	LOW
GOLDENBERG J Z 2017	Y	PY	Y	PY	Y	Y	Y	PY	PY	N	Y	Y	Y	Y	Y	Y	MODERATE
WU Z J 2013	Y	PY	Y	PY	Y	Y	N	PY	Y	N	Y	Y	Y	Y	Y	Y	LOW
SHEN N T 2017	Y	PY	Y	PY	Y	Y	N	PY	Y	N	Y	Y	Y	Y	Y	Y	LOW
POMARES B R 2021	Y	Y	Y	PY	Y	Y	N	PY	PY	N	Y	Y	Y	Y	Y	Y	LOW
KHAN M Y 2018	Y	PY	Y	PY	Y	Y	N	PY	Y	N	Y	Y	Y	Y	Y	Y	LOW
JOHNSTON B C 2012	Y	PY	Y	PY	Y	Y	N	PY	Y	N	Y	Y	Y	Y	Y	N	LOW
NARULA N 2017	Y	PY	Y	PY	Y	Y	N	PY	Y	N	Y	Y	Y	Y	N	N	LOW
DANG X 2020	Y	PY	Y	PY	Y	Y	N	PY	Y	N	Y	Y	Y	Y	Y	N	LOW
SHI Y 2016	Y	Y	Y	PY	Y	Y	N	PY	Y	N	Y	Y	Y	Y	Y	Y	LOW
LIU X L 2021	Y	PY	Y	PY	Y	Y	N	PY	Y	N	Y	Y	Y	Y	Y	Y	LOW
COLD F 2021	Y	PY	Y	PY	Y	Y	N	PY	Y	N	Y	Y	Y	Y	Y	Y	LOW
KAUR L 2020	Y	Y	Y	Y	Y	Y	Y	Y	Y	Y	Y	Y	Y	Y	Y	Y	HIGH
PENG L J 2019	Y	PY	Y	PY	Y	Y	N	PY	Y	N	Y	Y	Y	Y	Y	Y	LOW
LOSURDO G 2015	Y	PY	Y	PY	Y	Y	N	PY	Y	N	Y	Y	Y	Y	Y	Y	LOW
IHEOZOR-EJIOFOR Z 2020	Y	Y	Y	Y	Y	Y	Y	Y	Y	Y	Y	Y	Y	Y	Y	Y	HIGH
ASTO E 2019	Y	PY	Y	PY	Y	Y	N	PY	Y	N	Y	Y	Y	Y	Y	Y	LOW
IANIRO G 2019	Y	PY	Y	PY	Y	Y	N	PY	Y	N	Y	Y	Y	Y	Y	N	LOW
PROENÇA I M 2020	Y	PY	Y	PY	Y	Y	N	PY	Y	N	Y	Y	Y	Y	Y	N	LOW
CALDEIRA L D 2020	Y	PY	Y	PY	Y	Y	N	PY	Y	N	Y	Y	Y	Y	Y	Y	LOW
TARIQ R 2019	Y	PY	Y	PY	Y	Y	N	PY	Y	N	Y	Y	Y	Y	Y	Y	LOW
CHEN X R 2021	Y	PY	Y	PY	Y	Y	N	PY	Y	N	Y	Y	Y	Y	Y	N	LOW
YAN S 2019	Y	PY	Y	PY	Y	Y	N	PY	Y	N	Y	Y	Y	Y	Y	Y	LOW
WANG Z 2019	Y	PY	Y	PY	Y	Y	N	PY	Y	N	Y	Y	Y	Y	Y	Y	LOW
SUZUMURA E A 2019	Y	PY	Y	PY	Y	Y	N	PY	Y	N	Y	Y	Y	Y	Y	Y	LOW
MOHAMMADI H 2021	Y	PY	Y	PY	Y	Y	N	PY	Y	N	Y	Y	Y	Y	Y	Y	LOW
HADI A 2020	Y	PY	Y	PY	Y	Y	N	PY	Y	N	Y	Y	Y	Y	Y	N	LOW
PONTES K S D S 2021	Y	PY	Y	PY	Y	Y	N	PY	Y	N	Y	Y	Y	Y	Y	Y	LOW
ROUHANI M H 2019	Y	Y	Y	PY	Y	Y	N	PY	Y	N	Y	Y	Y	Y	Y	Y	LOW
ONG T G 2019	Y	Y	Y	Y	Y	Y	Y	Y	Y	Y	Y	Y	Y	Y	Y	Y	HIGH
SKONIECZNA-ŻYDECKA K 2020	Y	Y	Y	PY	Y	Y	N	Y	Y	Y	Y	Y	Y	Y	Y	Y	LOW
ZHANG G 2016	Y	Y	Y	Y	Y	Y	N	Y	Y	Y	Y	Y	Y	Y	Y	N	LOW
GOODMAN C 2021	Y	Y	Y	Y	Y	Y	N	PY	Y	N	Y	Y	Y	Y	Y	Y	LOW
GUO Q 2019	Y	Y	Y	Y	Y	Y	Y	Y	Y	Y	Y	Y	Y	Y	Y	Y	HIGH
JAFARNEJAD S 2016	Y	Y	Y	PY	Y	Y	N	Y	Y	N	Y	Y	Y	Y	Y	Y	LOW
COFFEY M J 2020	Y	Y	Y	Y	Y	Y	N	Y	Y	N	Y	Y	Y	Y	Y	Y	LOW
COZZOLINO M 2020	Y	Y	Y	Y	Y	Y	N	PY	Y	N	Y	Y	Y	Y	Y	Y	LOW
LI Y L 2021	Y	Y	Y	PY	Y	Y	N	PY	Y	N	Y	Y	Y	Y	Y	Y	LOW
LV T 2021	Y	Y	Y	PY	Y	Y	N	PY	Y	N	Y	Y	Y	Y	Y	Y	LOW
KRÜGER J F 2021	Y	Y	Y	PY	Y	Y	N	PY	Y	N	Y	Y	Y	Y	Y	Y	LOW
DENG H Y	Y	Y	Y	PY	Y	Y	N	PY	Y	N	Y	Y	Y	Y	Y	Y	LOW
SHEN T 2021	Y	Y	Y	PY	Y	Y	N	PY	Y	N	Y	Y	Y	Y	Y	Y	LOW
MILLER L E 2017	Y	Y	Y	PY	Y	Y	N	PY	Y	N	Y	Y	N	Y	Y	Y	VERY LOW
BLAABJERG S 2017	Y	Y	Y	PY	Y	Y	N	Y	Y	N	Y	Y	Y	Y	Y	Y	LOW
DALAL R 2017	Y	Y	Y	Y	Y	Y	Y	Y	Y	Y	Y	Y	Y	Y	Y	Y	HIGH
CAO Q 2018	Y	Y	Y	PY	Y	Y	N	Y	Y	N	Y	Y	Y	Y	Y	Y	LOW
DERMYSHI E 2017	Y	Y	Y	PY	Y	Y	N	Y	Y	N	Y	Y	Y	Y	Y	N	LOW
ACETI A 2017	Y	Y	Y	PY	Y	Y	N	Y	Y	N	Y	Y	Y	Y	Y	N	LOW
UPADHYAY R P 2020	Y	Y	Y	PY	Y	Y	N	Y	Y	N	Y	Y	Y	Y	Y	N	LOW
JORGENSEN A 2017	Y	N	Y	Y	Y	Y	N	Y	Y	N	Y	Y	Y	Y	Y	Y	VERY LOW
SHARIF S 2020	Y	Y	Y	Y	Y	Y	Y	Y	Y	Y	Y	Y	Y	Y	Y	Y	HIGH
YANG Y 2014	Y	Y	Y	PY	Y	Y	N	Y	Y	N	Y	N	N	Y	Y	N	VERY LOW
JIANG T L 2020	Y	Y	Y	PY	Y	Y	N	PY	Y	N	Y	N	N	Y	Y	N	VERY LOW
NAKAMURA H 2018	Y	PY	Y	PY	Y	Y	N	PY	Y	N	Y	N	N	Y	Y	N	VERY LOW
LIU D P 2020	Y	PY	Y	PY	Y	Y	N	Y	Y	N	Y	Y	Y	Y	Y	Y	LOW
ZHU X L 2019	Y	PY	Y	PY	Y	Y	N	Y	Y	N	Y	Y	Y	Y	Y	Y	LOW
SUNG V 2013	Y	Y	Y	Y	Y	Y	N	Y	Y	N	Y	Y	Y	Y	Y	Y	LOW
GREV J 2018	Y	Y	Y	Y	Y	Y	N	Y	Y	Y	Y	Y	Y	Y	Y	Y	LOW
WANG C C 2020	Y	Y	Y	Y	Y	Y	N	Y	Y	N	Y	Y	Y	Y	Y	Y	LOW
HAN M M 2019	Y	Y	Y	Y	Y	Y	N	PY	Y	N	Y	Y	Y	Y	Y	Y	LOW
DAVIDSON S 2021	Y	Y	Y	Y	Y	Y	Y	Y	Y	Y	Y	Y	Y	Y	Y	Y	HIGH
ZHANG X 2021	Y	Y	Y	Y	Y	Y	N	PY	Y	N	Y	Y	Y	Y	Y	Y	LOW
DERWA Y 2017	Y	Y	Y	Y	Y	Y	N	PY	Y	N	Y	Y	Y	Y	Y	Y	LOW
PABON-CARRASCO M 2020	Y	Y	Y	PY	Y	Y	N	PY	Y	N	Y	Y	Y	Y	Y	Y	LOW
FORD A C 2018	Y	Y	Y	Y	Y	Y	N	Y	Y	N	Y	Y	Y	Y	Y	Y	LOW
ASHA M Z 2020	Y	Y	Y	PY	Y	Y	N	Y	Y	N	Y	Y	Y	Y	Y	N	LOW
XU H L 2021	Y	Y	Y	PY	Y	Y	N	Y	Y	N	Y	Y	Y	Y	Y	Y	LOW
CONNELL M 2018	Y	Y	Y	PY	Y	Y	N	Y	Y	N	Y	Y	Y	Y	Y	Y	LOW
YUAN F Q 2017	Y	Y	Y	PY	Y	Y	N	Y	Y	N	Y	Y	Y	Y	Y	Y	LOW
WEN Y 2020	Y	Y	Y	PY	Y	Y	N	Y	Y	N	Y	Y	Y	Y	Y	Y	LOW
KHALESI S 2018	Y	Y	Y	Y	Y	Y	N	Y	Y	N	Y	Y	Y	Y	Y	N	LOW
HERNANDEZ-SAAVEDRA D 2018	Y	Y	Y	Y	Y	Y	N	Y	Y	N	Y	Y	Y	Y	Y	Y	LOW
KHAN M Y 2019	Y	Y	Y	Y	Y	Y	N	PY	Y	N	Y	Y	Y	Y	Y	Y	LOW
SAWAS T 2015	Y	Y	Y	Y	Y	Y	N	PY	Y	N	Y	Y	Y	Y	Y	N	LOW
YANG Z 2017	Y	Y	Y	Y	Y	Y	N	PY	Y	N	Y	Y	Y	Y	Y	Y	LOW
WU X D 2018	Y	Y	Y	Y	Y	Y	N	Y	Y	N	Y	Y	Y	Y	Y	N	LOW
SKONIECZNA-ZYDECKA K 2018	Y	Y	Y	PY	Y	Y	N	Y	Y	N	Y	Y	Y	Y	Y	Y	LOW
MILAJERDI A 2020	Y	Y	Y	PY	Y	Y	N	Y	Y	N	Y	Y	Y	Y	Y	Y	LOW
MILLER L E 2016	Y	Y	Y	PY	Y	Y	N	Y	Y	N	Y	Y	Y	Y	Y	N	LOW
ZHONG C Q 2017	Y	Y	Y	PY	Y	Y	N	Y	Y	N	Y	Y	Y	Y	Y	N	LOW
LIU B 2018	Y	Y	Y	PY	Y	Y	N	Y	Y	N	Y	Y	Y	Y	Y	N	LOW
MCKEAN J 2017	Y	Y	Y	PY	Y	Y	N	PY	Y	N	Y	Y	Y	Y	Y	N	LOW
GOH K K 2019	Y	Y	Y	PY	Y	Y	N	PY	Y	N	Y	Y	Y	Y	Y	Y	LOW
PAN H D 2017	Y	Y	Y	PY	Y	Y	N	PY	Y	N	Y	Y	Y	Y	Y	Y	LOW
NG Q X 2019	Y	Y	Y	PY	Y	Y	N	PY	Y	N	Y	Y	Y	Y	Y	Y	LOW
Le Morvan De Sequeira 2021	Y	Y	Y	PY	Y	Y	N	PY	Y	N	Y	Y	Y	Y	Y	Y	LOW
FU Y S 2020	Y	Y	Y	PY	Y	Y	N	PY	Y	N	Y	Y	Y	Y	Y	Y	LOW
ZHANG X L 2021	Y	Y	Y	PY	Y	Y	N	PY	Y	N	Y	Y	Y	Y	Y	Y	LOW
LEI W T 2017	Y	Y	Y	PY	Y	Y	N	PY	Y	N	Y	Y	Y	Y	Y	N	LOW
YEH T L 2018	Y	Y	Y	PY	Y	Y	N	PY	Y	N	Y	Y	Y	Y	Y	N	LOW
TAVAKOLY R 2021	Y	Y	Y	PY	Y	Y	N	PY	Y	N	Y	Y	Y	Y	Y	N	LOW
ASKARI G 2021	Y	Y	Y	PY	Y	Y	N	Y	Y	N	Y	Y	Y	Y	Y	Y	LOW
JIA L P 2018	Y	Y	Y	PY	Y	Y	N	PY	Y	N	Y	Y	Y	Y	Y	Y	LOW
TAO S 2019	Y	Y	Y	PY	Y	Y	N	PY	Y	N	Y	Y	Y	Y	Y	Y	LOW
THONGPRAYOON C 2019	Y	Y	Y	PY	Y	Y	N	PY	Y	N	Y	Y	Y	Y	Y	N	LOW
BAKHTIARY M 2021	Y	Y	Y	PY	Y	Y	N	PY	Y	N	Y	Y	Y	Y	Y	Y	LOW
MCFARLANE C 2019	Y	Y	Y	PY	Y	Y	N	PY	Y	N	Y	Y	Y	Y	Y	Y	LOW
HASAIN Z 2021	Y	Y	Y	PY	Y	Y	N	PY	Y	N	Y	Y	Y	Y	Y	Y	LOW
BOCK P M 2021	Y	Y	Y	PY	Y	Y	N	PY	Y	N	Y	Y	Y	Y	Y	Y	LOW
ZHENG H J 2019	Y	Y	Y	PY	Y	Y	N	PY	Y	N	Y	Y	Y	Y	Y	Y	LOW
HENDIJANI F 2018	Y	Y	Y	PY	Y	Y	N	PY	Y	N	Y	Y	Y	Y	Y	Y	LOW
TAO Y 2020	Y	Y	Y	PY	Y	Y	N	PY	Y	N	Y	Y	Y	Y	Y	Y	LOW
DU X Z 2019	Y	Y	Y	PY	Y	Y	N	PY	Y	N	Y	Y	Y	Y	Y	Y	LOW
ZHANG N 2020	Y	Y	Y	PY	Y	Y	N	PY	Y	N	Y	Y	Y	Y	Y	Y	LOW
CHI C 2020	Y	Y	Y	PY	Y	Y	N	PY	Y	N	Y	Y	Y	Y	Y	N	LOW
ZHANG C 2020	Y	Y	Y	PY	Y	Y	N	PY	Y	N	Y	Y	Y	Y	Y	Y	LOW
HUANG R 2017	Y	Y	Y	PY	Y	Y	N	PY	Y	N	Y	Y	Y	Y	Y	Y	LOW
SEILER C L 2020	Y	Y	Y	PY	Y	Y	N	PY	Y	N	Y	Y	Y	Y	Y	Y	LOW
HADI A 2021	Y	Y	Y	PY	Y	Y	N	PY	Y	N	Y	Y	Y	Y	Y	Y	LOW
ZHANG J 2020	Y	Y	Y	PY	Y	Y	N	PY	Y	N	Y	Y	Y	Y	Y	Y	LOW
SUN S Y 2021	Y	Y	Y	PY	Y	Y	N	PY	Y	N	Y	Y	Y	Y	Y	N	LOW
BOYLE R J 2009	Y	Y	Y	PY	Y	Y	N	PY	Y	N	Y	Y	Y	Y	Y	Y	LOW
LOSURDO G 2018	Y	Y	Y	PY	Y	Y	N	PY	Y	N	Y	Y	Y	Y	Y	N	LOW
JI T 2020	Y	Y	Y	PY	Y	Y	N	PY	Y	N	Y	Y	Y	Y	Y	Y	LOW
WANG F Y 2021	Y	Y	Y	PY	Y	Y	N	PY	Y	N	Y	Y	Y	Y	Y	Y	LOW
WANG Y Z 2016	Y	Y	Y	PY	Y	Y	N	PY	Y	N	Y	Y	Y	Y	Y	Y	LOW
IRWIN C 2020	Y	Y	Y	PY	Y	Y	N	PY	Y	N	Y	Y	Y	Y	Y	N	LOW
JIANG J 2021	Y	Y	Y	PY	Y	Y	N	PY	Y	N	Y	Y	Y	Y	Y	Y	LOW
AS'HABI A 2020	Y	Y	Y	PY	Y	Y	N	PY	Y	N	Y	Y	Y	Y	Y	Y	LOW
EJTAHED H 2021	Y	Y	Y	PY	Y	Y	N	PY	Y	N	Y	Y	Y	Y	Y	Y	LOW
RAO S 2009	Y	Y	Y	PY	Y	Y	N	PY	Y	N	Y	Y	Y	Y	Y	Y	LOW
LOHNER S 2014	Y	Y	Y	PY	Y	Y	N	PY	Y	N	Y	Y	Y	Y	Y	Y	LOW
MCLOUGHLIN R F 2017	Y	Y	Y	PY	Y	Y	N	PY	Y	N	Y	Y	Y	Y	Y	N	LOW
WILSON B 2019	Y	Y	Y	PY	Y	Y	N	PY	Y	N	Y	Y	Y	Y	Y	N	LOW
CHI C 2019	Y	Y	Y	PY	Y	Y	N	PY	Y	N	Y	Y	Y	Y	Y	Y	LOW
STACHOWSKA E 2020	Y	Y	Y	PY	Y	Y	N	PY	Y	N	Y	Y	Y	Y	Y	Y	LOW
DA SILVA BORGES D 2020	Y	Y	Y	PY	Y	Y	N	PY	Y	N	Y	Y	Y	Y	Y	Y	LOW
CAPURSO G 2016	Y	Y	Y	PY	Y	Y	N	PY	Y	N	Y	Y	Y	Y	Y	Y	LOW
SHAH A 2017	Y	Y	Y	PY	Y	Y	N	PY	Y	N	Y	Y	Y	Y	Y	Y	LOW
MASLENNIKOV R 2018	Y	Y	Y	PY	Y	Y	N	PY	Y	N	Y	Y	Y	Y	Y	Y	LOW
WIJARNPREECHA K 2020	Y	Y	Y	PY	Y	Y	N	Y	Y	N	Y	Y	Y	Y	Y	N	LOW
GHOSHAL U C 2020	Y	Y	Y	PY	Y	Y	N	PY	Y	N	Y	Y	Y	Y	Y	N	LOW
CHEN B 2018	Y	Y	Y	PY	Y	Y	N	PY	Y	N	Y	Y	Y	Y	Y	Y	LOW
GANDHI A 2021	Y	Y	Y	Y	Y	Y	N	Y	Y	N	Y	Y	Y	Y	Y	Y	LOW
FENG X 2021	Y	Y	Y	PY	Y	Y	N	Y	Y	N	Y	Y	Y	Y	Y	N	LOW
WIJARNPREECHA K 2020	Y	Y	Y	PY	Y	Y	N	Y	Y	N	Y	Y	Y	Y	Y	N	LOW
LI X Q 2021	Y	Y	Y	PY	Y	Y	N	Y	Y	N	Y	Y	Y	Y	Y	Y	LOW
ZENG Y 2021	Y	Y	Y	PY	Y	Y	N	Y	Y	N	Y	Y	Y	Y	Y	Y	LOW
FARHANGI M A 2020	Y	Y	Y	PY	Y	Y	N	Y	Y	N	Y	Y	Y	Y	Y	Y	LOW
YAO M E 2020	Y	Y	Y	PY	Y	Y	PY	Y	Y	N	Y	Y	Y	Y	Y	Y	HIGH
QI J Q 2018	Y	Y	Y	PY	Y	Y	N	Y	Y	N	Y	Y	Y	Y	Y	Y	LOW
SCHIATTARELA G G 2017	Y	Y	Y	PY	Y	Y	N	Y	Y	N	Y	Y	Y	Y	Y	Y	LOW
FARHANGI M A 2020	Y	Y	Y	PY	Y	Y	N	Y	Y	N	Y	Y	Y	Y	Y	Y	LOW
HEIANZA Y 2017	Y	Y	Y	PY	Y	Y	N	Y	Y	N	Y	Y	Y	Y	Y	Y	LOW
GUASTI L 2021	Y	Y	Y	PY	Y	Y	N	Y	Y	N	Y	Y	Y	Y	Y	N	LOW
ABBASALIZAD F M 2021	Y	Y	Y	PY	Y	Y	N	Y	Y	N	Y	Y	Y	Y	Y	Y	LOW
GE X 2019	Y	Y	Y	PY	Y	Y	N	Y	Y	N	Y	Y	Y	Y	Y	Y	LOW
HAN L 2019	Y	Y	Y	PY	Y	N	N	Y	Y	N	Y	Y	Y	Y	Y	Y	LOW
LI W 2020	Y	Y	Y	PY	Y	Y	N	Y	Y	N	Y	Y	Y	Y	Y	Y	LOW
DEHGHAN P 2020	Y	Y	Y	PY	Y	Y	N	Y	Y	N	Y	Y	Y	Y	Y	Y	LOW
FARHANGI M A 2020	Y	Y	Y	PY	Y	Y	N	Y	Y	N	Y	Y	Y	Y	Y	Y	LOW
LUTHER J 2010	Y	Y	Y	PY	Y	Y	N	Y	Y	N	Y	Y	Y	Y	Y	N	LOW
LIU R Q 2019	Y	Y	Y	PY	Y	Y	N	Y	Y	N	Y	Y	Y	Y	Y	Y	LOW
DARDIOTIS E 2020	Y	Y	Y	PY	Y	Y	N	Y	Y	N	Y	Y	Y	Y	Y	Y	LOW
NG Q X 2019	Y	Y	Y	PY	Y	Y	N	Y	Y	N	Y	Y	Y	Y	Y	Y	LOW
CAO Y 2014	Y	Y	Y	PY	Y	Y	N	Y	Y	N	Y	Y	Y	Y	Y	Y	LOW
ZHUANG X 2019	Y	Y	Y	PY	Y	Y	N	Y	Y	N	Y	Y	Y	Y	Y	Y	LOW
SAFADI J M 2021	Y	Y	Y	PY	Y	Y	N	Y	Y	N	Y	Y	Y	Y	Y	Y	LOW
WANG L 2020	Y	Y	Y	PY	Y	Y	N	Y	Y	N	Y	Y	Y	Y	Y	Y	LOW
KIM K N 2019	Y	Y	Y	PY	Y	Y	N	Y	Y	N	Y	Y	Y	Y	Y	Y	LOW
QU H 2019	Y	Y	Y	PY	Y	Y	N	Y	Y	N	Y	Y	Y	Y	Y	Y	LOW
ZHOU J 2020	Y	Y	Y	PY	Y	Y	N	Y	Y	N	Y	Y	Y	Y	Y	Y	LOW
SANADA K 2020	Y	Y	Y	PY	Y	Y	N	Y	Y	N	Y	Y	Y	Y	Y	Y	LOW
GOU X 2021	Y	Y	Y	PY	Y	Y	N	Y	Y	N	Y	Y	Y	Y	Y	Y	LOW
OJO O 2021	Y	Y	Y	PY	Y	Y	N	Y	Y	N	Y	Y	Y	Y	Y	Y	LOW
NIKOLOVA V L 2021	Y	Y	Y	PY	Y	Y	N	Y	Y	N	Y	Y	Y	Y	Y	Y	LOW
SHARPTON S R 2019	Y	Y	Y	PY	Y	Y	N	Y	Y	N	Y	Y	Y	Y	Y	Y	LOW
CHANG Y 2016	Y	Y	Y	PY	Y	Y	N	Y	Y	N	Y	Y	Y	Y	Y	Y	LOW
GETHINGS-BEHNCKE C 2020	Y	Y	Y	PY	Y	Y	N	Y	Y	N	Y	Y	Y	Y	Y	Y	LOW
LI F 2021	Y	Y	Y	PY	Y	Y	N	Y	Y	N	Y	Y	Y	Y	Y	Y	LOW
SUN Q 2018	Y	Y	Y	PY	Y	Y	N	Y	Y	N	Y	Y	Y	Y	Y	Y	LOW
MALAGON-ROJAS J N 2020	Y	Y	Y	Y	Y	Y	N	Y	Y	N	Y	Y	Y	Y	Y	Y	LOW
ZHU H F 2020	Y	Y	Y	PY	Y	Y	N	Y	Y	N	Y	Y	Y	Y	Y	Y	LOW
KAHN J 2020	Y	Y	Y	PY	Y	Y	N	Y	Y	N	Y	Y	Y	Y	Y	Y	LOW
KADOSH K C 2021	Y	Y	Y	PY	Y	Y	N	Y	Y	N	Y	Y	Y	Y	Y	Y	LOW
SUN M 2021	Y	Y	Y	PY	Y	Y	N	Y	Y	N	Y	Y	Y	Y	Y	Y	LOW
MILAJERDI A 2021	Y	Y	Y	PY	Y	Y	N	Y	Y	N	Y	Y	Y	Y	Y	Y	LOW
CHAN C K Y 2020	Y	Y	Y	PY	Y	Y	N	Y	Y	N	Y	Y	Y	Y	Y	Y	LOW
ZAMA D 2021	Y	Y	Y	PY	Y	Y	N	Y	Y	N	Y	Y	Y	Y	Y	Y	LOW
SORENSEN K 2021	Y	Y	Y	PY	Y	Y	N	Y	Y	N	Y	Y	Y	Y	Y	Y	LOW
JIA L 2021	Y	Y	Y	PY	Y	Y	N	Y	Y	N	Y	Y	Y	Y	Y	Y	LOW
van LANEN A 2021	Y	Y	Y	PY	Y	Y	N	Y	Y	N	Y	Y	Y	Y	Y	Y	LOW
SALARI A 2021	Y	Y	Y	PY	Y	Y	N	Y	Y	N	Y	Y	Y	Y	Y	Y	LOW
Fatahi S 2021	Y	Y	Y	PY	Y	Y	N	Y	Y	N	Y	Y	Y	Y	Y	Y	LOW
Kinross JM 2013	Y	Y	Y	PY	Y	Y	N	Y	Y	N	Y	Y	Y	Y	Y	Y	LOW
Liu H 2016	Y	Y	Y	PY	Y	Y	N	Y	Y	N	Y	Y	Y	Y	Y	Y	LOW
Liu RT 2019	Y	Y	Y	PY	Y	Y	N	Y	Y	N	Y	Y	Y	Y	Y	Y	LOW
Miller LE 2019	Y	Y	Y	PY	Y	Y	N	Y	Y	N	Y	Y	Y	Y	Y	Y	LOW
Prosberg M 2016	Y	Y	Y	PY	Y	Y	N	Y	Y	N	Y	Y	Y	Y	Y	Y	LOW
Sohail G 2018	Y	Y	Y	PY	Y	Y	N	Y	Y	N	Y	Y	Y	Y	Y	Y	LOW
Szajewska H 2018	Y	Y	Y	PY	Y	Y	N	Y	Y	N	Y	Y	Y	Y	Y	Y	LOW
Zhang J 2020	Y	Y	Y	PY	Y	Y	N	Y	Y	N	Y	Y	Y	Y	Y	Y	LOW
