# Supplementary material for: Gastrointestinal Microbiome and Multiple Health Outcomes: Umbrella Review
Source: Nutrients. 2022 Sep 9;14(18):3726. doi: 10.3390/nu14183726 (PMC9505003; doi:10.3390/nu14183726)
Supplement: Supplementary file 1 [file nutrients-14-03726-s001.zip › Supplementary Table S13 GRADE.xlsx]

## Sheet: Sheet1
FIRST AUTHOR + YEAR	OUTCOME	Estimate（95%CI）	No.of STUDIES	number of cases or total participants	RCTs	Risk of Bias	Inconsistency	Indirectness	Imprecision	Publication bias	Plausible Confouding	Large effect	Doseresponse gradient	Quality
BESERRA B 2015	total cholesterol concentrations after prebiotic supplementation	– 0.25 (−0.48 to −0.02)	44452	313/513	9	Serious Risk	Serious Inconsistency	Serious Indirectness	No Serious Risk	Detected	No	No	No	+
BESERRA B 2015	LDL-c concentrations after prebiotic supplementation	−0.2 (−0.44 to −0.00)	44452	313/513	9	Serious Risk	Serious Inconsistency	Serious Indirectness	No Serious Risk	Undetected	No	No	No	+
BESERRA B 2015	triglycerides concentrations after synbiotics supplementation	-0.43 (−0.70 to 0.15)	44268	148/513	3	Serious Risk	Serious Inconsistency	Serious Indirectness	Serious Risk	Undetected	No	No	No	+
BESERRA B 2015	fasting insulin after synbiotics supplementation	−0.39 (−0.75 to −0.02)	44268	180/513	3	Serious Risk	Serious Inconsistency	Serious Indirectness	Serious Risk	Undetected	No	No	No	+
BESERRA B 2015	triglycerides concentrations after prebiotic supplementation	−0.72 (−1.20 to -0.23)	44452	313/513	9	Serious Risk	Serious Inconsistency	Serious Indirectness	Serious Risk	Detected	No	No	No	+
BESERRA B 2015	HDL-c concentrations after prebiotic supplementation	0.49 (0.01 to 0.97)	44452	313/513	9	Serious Risk	Serious Inconsistency	Serious Indirectness	Serious Risk	Undetected	No	No	No	+
PARK S 2015	Body weight	-1.77(-4.84 to 1.29)	4	94	4	Serious Risk	No Serious Inconsistency	No Serious Indirectness	Very Serious Risk	Undetected	No	No	No	+
PARK S 2015	BMI	0.77(-0.24 to 1.78)	4	80	4	Serious Risk	No Serious Inconsistency	No Serious Indirectness	Very Serious Risk	Undetected	No	No	No	+
GOLDENBERG J Z 2017	Incidence of C. difficile-associated diarrhea	0.4(0.3 to 0.52)	31	4525/8672	31	Serious Risk	No Serious Inconsistency	No Serious Indirectness	No Serious Risk	Undetected	No	No	No	+++
GOLDENBERG J Z 2017	Detection of C. difficile in stool	0.86（0.67 to 1.10）	15	1214	15	Serious Risk	No Serious Inconsistency	No Serious Indirectness	No Serious Risk	Undetected	No	No	No	+++
GOLDENBERG J Z 2017	Incidence of adverse events	RR 0.83（0.71 to 0.97）	32	4329/8305	32	Serious Risk	Serious Inconsistency	No Serious Indirectness	No Serious Risk	Detected	No	No	No	+
GOLDENBERG J Z 2017	Antibiotic‐associated diarrhea	RR 0.58（0.48 to 0.70）	33	8870	33	Serious Risk	Serious Inconsistency	No Serious Indirectness	No Serious Risk	Detected	No	No	No	+
GOLDENBERG J Z 2017	Length of hospital stay	‐0.17 （-1.03 to 0.68）	4	NP	4	Serious Risk	No Serious Inconsistency	No Serious Indirectness	No Serious Risk	Detected	No	No	No	++
WU Z J 2013	The main outcome measures are the occurrence of diarrhea and positive stool C . difficile cytotoxin assay or culture（Lactobacillus）	0.38（0.22 to 0.67）	6	597/1194	6	Serious Risk	Serious Inconsistency	No Serious Indirectness	No Serious Risk	Strongly Suspected	No	No	Yes	++
WU Z J 2013	The main outcome measures are the occurrence of diarrhea and positive stool C . difficile cytotoxin assay or culture（Lactobacillus acidophilus）	0.63（0.31 to 1.28）	4	431/861	4
WU Z J 2013	The main outcome measures are the occurrence of diarrhea and positive stool C . difficile cytotoxin assay or culture（Lactobacillus casei）	0.05（0.01 to 0.36）	1	86/170	1
SHEN N T 2017	incidence of CDI (diarrhea and either positive stool cytotoxin, culture, or polymerase chain reaction testing for C difficile)	0.42（0.3 to 0.57）	19	6261	19	Serious Risk	No Serious Inconsistency	No Serious Indirectness	No Serious Risk	Undetected	No	No	No	+++
		0.32 (0.22 to 0.48）	14	NP	14
		0.7 (0.4 to 1.23）	5	NP	5
		0.25 (0.01 to 5.79）	1	NP	1
		0.4 (0.08to 1.99）	1	NP	1
		0.7 (0.34 to 1.47）	1	NP	1
		0.28 (0.11to 0.68）	1	NP	1
		0.21 (0.11 to 0.42）	2	NP	2
		0.41 (0.14 to 1.2）	1	NP	1
		0.05 (0.00 to 0.87）	1	NP	1
		0.36 (0.02 to 8.69）	1	NP	1
		0.73 (0.29 to 1.88）	3	NP	3
		0.29 (0.01 to 6.76）	1	NP	1
		0.63 (0.29 to 1.37）	5	NP	5
	Adverse Events	0.97 (0.86 to 1.09）	15	6431	15
POMARES B R 2021	FMT effectiveness (Recovery was defined as the absence of diarrhea between 8 and 13 weeks following treatment)	0.82 (0.75 to 0.89）	15	1168	12	Serious Risk	No Serious Inconsistency	No Serious Indirectness	No Serious Risk	Undetected	No	No	No	+++
		-0.74 (-0.90 to -0.58）	NP	NP	NP
		0.44 (0.20 to 0.69）	NP	NP	NP
		-2.28 (-2.63 to -1.93）	NP	NP	NP
KHAN M Y 2018	Clinical cure from rCDI defined as resolution of diarrhea after single FMT infusion.	2.45 (0.78 to 7.71）	5	79/112	5	Serious Risk	Serious Inconsistency	No Serious Indirectness	Serious Risk	Undetected	No	No	No	+
		0.62 (0.15 to 2.54）	2	57/63	2
	Resolution of diarrhea after multiple fecal microbiota transplantation (FMT) infusions	1.82(0.6 to 5.59）	3	37/43	3
	Clostridium difficile recurrence	0.18(0.02 to 2.23）	3	12/52	3
	Resolution of diarrhea	2.98(0.56 to 15.93）	3	33/52	3
	Resolution of diarrhea	3.68(0.74 to 18.22）	2	44752	2
JOHNSTON B C 2012	Incidence of Clostridium difficile–associated diarrhea（CDAD）	0.34(0.24 to 0.49）	20	40/1974	20	Serious Risk	No Serious Inconsistency	No Serious Indirectness	No Serious Risk	Undetected	No	No	No	+++
	Incidence of Adverse Events	0.82(0.65 to 1.05）	17	166/1783	17
NARULA N 2017	not achieving Clinical remission with donor FMT	0.76(0.62 to 0.93）	4	81/140	4	Serious Risk	No Serious Inconsistency	No Serious Indirectness	No Serious Risk	Undetected	No	No	No	+++
	not achieving endoscopic remission with donor FMT	0.85(0.69 to 1.05）	4	103/140	4
DANG X 2020	clinical remission	2.40(1.49 to 3.88）	3	71/162	3	Serious Risk	No Serious Inconsistency	No Serious Indirectness	No Serious Risk	Undetected	No	No	No	+++
	clinical response	3.09(1.53 to 6.25）	3	89/162	3
	serious adverse events	1.29(0.46 to 3.57）	4	9/140	4
	clinical response	2.48(1.18 to 5.21）	4	69/140	4
	clinical remission	3.47(1.193to 6.25）	4	53/140	4
SHI Y 2016	clinical remission	40.5%(24.7% to 58.7%）	13	141	0	Serious Risk	No Serious Inconsistency	No Serious Indirectness	No Serious Risk	Undetected	No	No	No	++
	clinical response	66.1%(43.7%to 83.0%）	11	132	0
LIU X L 2021	combined clinical remission with endoscopic remission/response	0.76(0.65 to 0.89）	3	60/86	3	Serious Risk	No Serious Inconsistency	No Serious Indirectness	No Serious Risk	Undetected	No	No	No	+++
		0.79(0.70 to 0.97）	2	45/61	2
		0.79(0.70 to 0.89）	3	85/117	3
		0.79(0.58 to 1.09）	2	20/30	2
		0.79(0.69 to 0.90）	3	63/86	3
		0.79(0.65 to 0.96）	2	42/61	2
COLD F 2021	pooled response ratio after delivery of a single treatment with FMT capsules	85%(82% to 88%）	16	723	NP	Serious Risk	No Serious Inconsistency	No Serious Indirectness	No Serious Risk	Undetected	No	No	No	++
KAUR L 2020	Clinical remission	1.73(1.19 to 2.54）	9	594	9	No Serious Risk	No Serious Inconsistency	No Serious Indirectness	No Serious Risk	Undetected	No	No	No	++++
		2.02(1.31 to 3.12）	5	374	5
		1.44(0.79 to 2.63）	4	220	4
RUFINO M N 2021	improvement in colon endoscopic scores	‘-0.58(-1.11 to -0.05）	3	93	3	Serious Risk	No Serious Inconsistency	No Serious Indirectness	No Serious Risk	Strongly Suspected	No	No	No	++
PENG L J 2019	remission rate	1.40(1.27 to 1.53）	27	1942	27	Serious Risk	No Serious Inconsistency	No Serious Indirectness	No Serious Risk	Detected	No	No	No	+
		1.33(1.16 to 1.54）	11	NP	11
		1.40(1.27 to 1.64）	16	NP	16
		1.36(1.20 to 1.53）	17	NP	17
		1.45(1.24 to 1.70）	8	NP	8
		1.40(1.27 to 1.64）	2	NP	2
LOSURDO G 2015	the efficacy of EcN in inducing remission for ulcerative colitis	0.92(0.15 to 5.66）	3	267	3	Serious Risk	Serious Inconsistency	No Serious Indirectness	No Serious Risk	Undetected	No	No	No	++
	Maintenance of remission	1.07(0.70 to 1.64）	4	442	4
	the side effects observed in EcN treatment.	1.44(0.80 to 2.59）	6	719	6
IHEOZOR-EJIOFOR Z 2020	Clinical relapse	0.87(0.63 to 1.18）	4	361	4	Serious Risk	Serious Inconsistency	No Serious Indirectness	No Serious Risk	Strongly Suspected	No	No	No	+
	Maintenance of clinical remission	1.16(0.98 to 1.37）	2	141	2
	Clinical relapse	1.01(0.84 to 1.22）	2	452	2
	Maintenance of clinical remission	1.06(0.90 to 1.25）	1	125	1
	Clinical relapse	1.11(0.66 to 1.84）	2	242	2
	Maintenance of clinical remission	1.05(0.89 to 1.24）	1	122	1
ASTO E 2019	remission in active UC patients, assessed with the Ulcerative Colitis Disease Activity Index (UCDAI) and Disease Activity Index (DAI)/Mayo scores	1.55(1.13 to 2.15）	6	503	6	Serious Risk	No Serious Inconsistency	No Serious Indirectness	No Serious Risk	Strongly Suspected	No	No	No	++
	Efficacy of inducing/maintaining remission	1.55(1.13 to 2.15）	6	503	6
		1.73(1.23 to 2.43）	6	424	6
		1.04(0.35 to 3.06）	3	168	3
		1.99(1.25 to 3.15）	4	348	4
		1.38(0.86 to 2.21）	4	313	4
	Efficacy of Probiotics at Maintaining Remission	0.92(0.82 to 1.04）	3	513	3
IANIRO G 2019	Efficacy of Faecal microbiota transplantation in irritable bowel syndrome	0.98(0.58 to 1.66）	5	267	5	Serious Risk	Serious Inconsistency	No Serious Indirectness	No Serious Risk	Strongly Suspected	No	No	No	+
PROENÇA I M 2020	HDL cholesterol	0.09 mmol/L ( 0.02 to 0.15)	6	80/146	6	Serious Risk	No Serious Inconsistency	No Serious Indirectness	No Serious Risk	Strongly Suspected	No	No	No	++
	HbA1c	-1.69 mmol/L ( -2.81 to -0.05)	6	80/146	6
	LDL cholesterol	0.19 mmol/L ( 0.05 to 0.34)	6	80/146	6
	Fasting glucose	-0.09 mmol/L ( -0.22 to 0.04)	6	78/144	6
	triglycerides	-0.02 mmol/L ( -0.52 to 0.49)	6	66/120	6	Serious Risk	Serious Inconsistency	No Serious Indirectness	No Serious Risk					+
	total cholesterol	-1.69 mmol/L ( -2.81 to -0.05)	5	69/124	5	Serious Risk	No Serious Inconsistency	No Serious Indirectness	No Serious Risk					++
	BMI	-0.86 mmol/L ( -2.90 to 1.20)	3	46/78	3	Serious Risk	Serious Inconsistency	No Serious Indirectness	No Serious Risk					+
	weight	1.67 mmol/L ( -9.50 to 12.84)	4	56/110	4	Serious Risk	Serious Inconsistency	No Serious Indirectness	No Serious Risk					+
	HOMA-IR	-0.35 mmol/L ( -1.56 to 0.86)	4	59/115	4	Serious Risk	Serious Inconsistency	No Serious Indirectness	No Serious Risk					+
CALDEIRA L D 2020	clinical remission	1.70(1.22 to 2.56）	6	179/355	6	Serious Risk	No Serious Inconsistency	No Serious Indirectness	No Serious Risk	Undetected	No	No	No	+++
	clinical response	1.68(1.04 to 2.72）	4	140/277	4	Serious Risk	Serious Inconsistency	No Serious Indirectness	No Serious Risk					++
TARIQ R 2019	not achieving antimicrobial resistance (AMR) remission	0.44(0.20 to 0.99）	4	57/111	0	Serious Risk	Serious Inconsistency	No Serious Indirectness	Serious Risk	Strongly Suspected	No	No	No	+
		0.37(0.18 to 0.79）	2	26/56	0	Serious Risk	No Serious Inconsistency	No Serious Indirectness	Serious Risk					+
CHEN X R 2021	the incidence of abdorminal distension	0.27(0.17 to 0.43）	11	493/981	11	Serious Risk	No Serious Inconsistency	No Serious Indirectness	No Serious Risk	Undetected	No	No	No	+++
	the incidence of diarrhea	0.20(0.12 to 0.32）	14	604/1205	14
	the incidence of vomiting	0.20(0.12 to 0.32）	8	301/602	8
	the incidence of gastric retention	0.25(0.11 to 0.55）	3	148/296	3
	the incidence of constipation	0.20(0.12 to 0.32）	14	590/1177	14
	the incidence of reflux	0.47(0.21 to 1.02）	7	316/632	7
	the incidence of digestive tract hemorrhage	0.31(0.18 to 0.52）	12	537/1072	12
	the incidence of stress ulcer	0.64(0.21 to 1.92）	3	118/236	3
	the incidence of gastrointestinal complications	0.29(0.24 to 0.36）	17	3169/6352	17
	the incidence of infection	0.27(0.21 to 0.36）	16	1243/2483	16
	the incidence of pulmonary infection	0.28(0.20 to 0.39）	16	698/1391	16
	the incidence of urinary tract infection	0.23(0.13 to 0.43）	9	384/768	9
	the incidence of gastrointestinal infection	0.30(0.14to 0.66）	4	161/324	4
	the enteral nutrition target time	-2.18(-2.56 to -1.80）	4	163/324	4		Serious Inconsistency							++
	the length of hospital stay	-8.70(-13.24 to -4.16）	3	131/260	3		Serious Inconsistency							++
	diamine oxidase	-0.78(-0.93 to -0.63）	3	147/293	3		No Serious Inconsistency							+++
	D-lactic acid	-0.06(-0.07 to -0.05）	4	162/324	4
	dysbacteriosis rate	0.17(0.07 to 0.41）	3	132/262	3
	albumin	3.38(2.74 to 4.02）	15	637/1271	15
	prealbumin	32.20(24.42 to 39.98）	7	302/601	7
	total protein	4.91(3.20 to 6.62）	7	336/672	7		Serious Inconsistency							++
	hemoglobin	9.62(7.92 to 11.32）	10	437/872	10		No Serious Inconsistency							+++
	immunoglobulin A	0.23(0.12 to 0.34）	4	144/280	4
	immunoglobulin G	0.33(0.21 to 0.45）	3	106/208	3
	immunoglobulin M	0.14(0.00 to 0.28）	4	147/290	4
YAN S 2019	TC concentrations	-3.04(-4.88 to -1.21）mg/dL	12	767	12	Serious Risk	No Serious Inconsistency	No Serious Indirectness	No Serious Risk	Undetected	No	No	No	+++
	LDL concentrations	-2.28(-3.60 to -0.96）mg/dL	11	737	11
	HDL concentrations	-0.26(-2.39 to 1.87）mg/dL	12	767	12		Very Serious Inconsistency							+
	TG concentrations	-0.86(-2.54 to 0.83）17.0mg/dL	11	726	11		No Serious Inconsistency							+++
	TC concentrations	-1.23(-3.52 to 1.06）mg/dL	5	NP	5
	TC concentrations	-3.82(-6.14 to -1.50）mg/dL	7		7
	TG concentrations	9.10(1.38 to 16.81）mg/dL	4		4
	TG concentrations	-1.36(-3.08 to 0.37）mg/dL	7		7
WANG Z 2019	Effects on Body Weight	-0.55 (-0.91 to -0.19) kg	10	315/641	10	Serious Risk	Serious Inconsistency	No Serious Indirectness	No Serious Risk	Undetected	No	No	No	++
	Effects on Body Mass Index (BMI)	-0.30 (-0.43 to -0.18) kg/m^2,	11	357/717	11					Detected				+
		-0.29 (-0.46 to -0.12) kg m−2	6	213	6					Strongly Suspected				+
		-0.18 (-0.48 to 0.12) kg m−2	4	119	4		No Serious Inconsistency							++
		-0.36 (-0.52 to 0.20) kg m−2	4	138	4		Serious Inconsistency							+
		-0.15 (-0.39 to 0.10) kg m−2	6	194	6									+
	Effects on Waist Circumference	-1.20 (-2.21 to -0.19) cm	8	281/573	8		Very Serious Inconsistency			Undetected				+
		-1.53 (-2.64 to -0.41) cm	6	212	6									+
		-0.32 (-0.84 to 0.20) cm	2	69	2		No Serious Inconsistency		Serious Risk					++
		-1.69 (-3.04 to 0.33) cm	4	168	4		Very Serious Inconsistency		No Serious Risk					+
		-0.42 (-0.91 to 0.07) cm	4	113	4		No Serious Inconsistency							+++
		-1.34 (-2.76 to 0.08) cm	6	187	6		Very Serious Inconsistency							+
		-1.11 (-1.64 to -0.59) cm	2	94	2		No Serious Inconsistency		Serious Risk					++
	Effects on Fat Mass	-0.91 (-1.19 to -0.63) kg	11	311/632	11				No Serious Risk	Undetected				+++
	Effects on Fat Percentage	-0.92 (-1.27 to -0.56) %	6	224/450	6		Serious Inconsistency							++
	Effects on Fasting Plasma Glucose (FPG)	-0.35 (-0.67 to -0.02)	6	215/436	6					Detected				+
	Effects on Hemoglobin A1c (HbA1c)	-0.23 (-0.46 to 0.01)	6	182/374	6		No Serious Inconsistency			Undetected				+++
	Effects on Insulin	-0.44 (-0.84 to -0.03)	6	215/436	6		Serious Inconsistency							++
	Effects on Homeostasis Model of Assessment for Insulin Resistance Index (HOMA-IR)	-0.51 (-0.96 to -0.05)	5	166/341	5									++
SUZUMURA E A 2019	the effect on body weight	-0.54 (-1.09 to 0.01) kg	18	660/1239	NP	Serious Risk	No Serious Inconsistency	No Serious Indirectness	No Serious Risk	Undetected	No	No	No	+++
	the effect on BMI	-0.19 (-0.43 to 0.04) kg/m^2	15	447/895			Serious Inconsistency							++
	the effect on waist circumference	-0.82 (-1.43 to -0.21) cm	12	455/864			No Serious Inconsistency							+++
	the effect on body weight	-1.24 (-2.57 to 0.01) kg	4	147/301										+++
	the effect on BMI	-0.33 (-1.22 to 0.57) kg/m^2	2	50/100					Serious Risk					++
	the effect on waist circumference	-3.39 (-5.07 to -1.72) cm	2	72/148					Serious Risk					++
MOHAMMADI H 2021	effect of the PFMP on body weight	-0.91 (-1.59 to -0.22) kg	16	NP	16	Serious Risk	Serious Inconsistency	No Serious Indirectness	No Serious Risk	Undetected	No	No	No	++
	effect of the PFMP on BMI	-0.33 (-0.48 to 0.18) kg/m^2	15		15		No Serious Inconsistency							+++
	effect of the PFMP on waist circumference	-0.59 (-1.55 to 0.36) cm	6		6
	effect of the PFMP on body fat percentage	-3.75 (-9.39 to 1.90) %	5		5		Very Serious Inconsistency							+
HADI A 2020	The effects of synbiotic supplementation on BMI	-0.12 (-0.40 to 0.16) kg/m^2	22	NP	NP	Serious Risk	No Serious Inconsistency	No Serious Indirectness	No Serious Risk	Undetected	No	No	No	+++
	The effects of synbiotic supplementation on WC	-2.07 (-3.11 to -1.03) cm	12
		-1.72 (-3.49 to 0.05) cm	7
		-2.25 (-3.53 to -0.97) cm	5
		-1.30 (-3.44 to 0.83) cm	6
		-2.31 (-3.49 to -1.12) cm	6
		-1.97 (-3.06 to -0.86) cm	9
		-2.70 (-5.54 to 0.15) cm	3
		-2.269(-4.76 to 0.37) cm	3
		-1.69 (-3.23 to -0.16) cm	8
	The effects of synbiotic supplementation on weight	-0.80 (-1.56 to -0.03) kg	20
		-0.54 (-2.93 to 1.85 ) kg	9
		-0.83 (-1.63 to -0.02 ) kg	11
		-1.48 (-2.68 to -0.28 ) kg	14
		-0.33 (-1.32 to 0.67 ) kg	6
	The effects of synbiotic supplementation on body fat	0.02 (-1.27 to 1.87) %	6				Serious Inconsistency							++
PONTES K S D S 2021	Effects on waist-to-hip ratio	-0.01 (-0.01 to -0.01)	5	192/395	5	Serious Risk	No Serious Inconsistency	No Serious Indirectness	No Serious Risk	Undetected	No	No	No	+++
	Effects on total abdominal fat area	-9.69 (-14.47 to -4.91 ) cm2	4	350	4									+++
	Effects on subcutaneous abdominal fat area	-6.24 (-8.94 to -3.54 ) cm2	5	445	5									+++
	Effects on visceral abdominal fat area	-3.46 (-6.55 to 0.38 ) cm2	4	350	4									+++
	Effects on C-reactive protein	-0.45 (-0.99 to 0.08 ) mg/L	9	314/649	9		Very Serious Inconsistency							+
	Effects on tumor necrosis factor α	-0.16 (-0.24 to -0.08 ) pg/ml	4	96/191	4		No Serious Inconsistency							+++
	Effects on interleukin-6	0.05 (-0.28 to 0.39 ) pg/ml	3	66/142	3		Serious Inconsistency							++
	Effects on glucose	-0.07 (-0.26 to 0.13 ) mmol/L	13	418/977	13		Very Serious Inconsistency			Detected				+
	Effects on fasting insulin	-0.85 (-1.50 to -0.21 ) mcU/ml	10	322/776	10		No Serious Inconsistency			Undetected				+++
	Effects on glycated hemoglobin (HbA1C)	-0.03 (-0.14 to 0.09 ) %	7	246/505	7		Very Serious Inconsistency							+
	Effects on Homeostasis Model of Assessment for Insulin Resistance Index (HOMA-IR)	-0.08 (-0.34 to 0.18 )	9	322/765	9		No Serious Inconsistency							+++
	Effects of probiotics on systolic blood pressure	-0.23 (-0.57 to 0.12 )mmHg	7	318/641	7									+++
	Effects of probiotics on diastolic blood pressure	-0.35 (-0.76 to 0.06 )mmHg	7	318/641	7									+++
ROUHANI M H 2019	adiponectin concentration	-0.04 (-0.28 to 0.19 )	8	NP	8	Serious Risk	No Serious Inconsistency	No Serious Indirectness	No Serious Risk	Undetected	No	No	No	+++
	leptin concentration	-0.30 (-0.86 to 0.26 )	6		6		Serious Inconsistency							++
ONG T G 2019	Occurrence of new cases of colic at study end, as defined by the Wessel criteria.	0.46 (0.18 to 1.19 )	3	571/1148	3	Serious Risk	Serious Inconsistency	No Serious Indirectness	Serious Risk	Undetected	No	No	No	+
	Adverse effects, including parental depression and mental illness, choking, bacterial infection or apparent life‐threatening/serious events (dichotomous outcome)	1.02 (0.14 to 7.21 )	6 ( only one trial got estimated)	1851( 1014)	6 (1)									+
	Duration of crying	-32.57 (-55.60 to -9.54 ) min per day	3	355/707	3		Very Serious Inconsistency							+
		-20.65 (-47.23 to -5.92 ) min per day	2	345/687	2									+
SKONIECZNA-ŻYDECKA K 2020	Effects on Crying Duration	-2.01 (-2.76 to -1.26 )	12	NP	12	Serious Risk	Very Serious Inconsistency	No Serious Indirectness	No Serious Risk	Detected	No	No	No	+
	Response (The probability of at least a 50% reduction in crying duration) to Probiotic Intervention	1.98 (1.50 to 2.62 )	9		9		Serious Inconsistency			Undetected				++
ZHANG G 2016	the risk of atopic sensitization	0.89 (0.77 to 1.03)	17	2974	17	Serious Risk	No Serious Inconsistency	No Serious Indirectness	No Serious Risk	Undetected	No	No	No	+++
		0.78 (0.66 to 0.92)	12	1159/2085	12
	Food Sensitization	0.92 (0.75 to 1.12)	9	1506	9
		0.77 (0.61 to 0.98)	5	477/807	5
GOODMAN C 2021	incidence antibiotic-associated diarrhoea	0.63 (0.54 to 0.73)	42	5985/11305	42	Serious Risk	Serious Inconsistency	No Serious Indirectness	No Serious Risk	Undetected	No	No	No	++
		0.54 (0.38 to 0.76)	4	324/651	4		No Serious Inconsistency							+++
GUO Q 2019	incidence of antibiotic-associated diarrhoea	0.45 (0.36 to 0.56)	33	6352	33	Serious Risk	Serious Inconsistency	No Serious Indirectness	No Serious Risk	Undetected	No	No	No	++
		0.37 (0.30 to 0.46)	20	4038	20		No Serious Inconsistency							+++
	Adverse events	0.00 (‐0.01 to 0.01)	24	4415	24		Very Serious Inconsistency							+
	Duration of diarrhea (days)	‘-0.91 (-1.38 to -0.44 )	8	1263	8									+
JAFARNEJAD S 2016	incidence of antibiotic-associated diarrhoea	0.58 (0.48 to 0.71)	30	3805/7023	30	Serious Risk	Serious Inconsistency	No Serious Indirectness	No Serious Risk	Undetected	No	No	No	++
		0.47 (0.40 to 0.56)	25	20873826	25		No Serious Inconsistency							+++
		0.94 (0.76 to 1.15)	5	1718/3434	5		Serious Inconsistency							++
COFFEY M J 2020	number of pulmonary exacerbations	-0.32 (-0.68 to 0.03) episodes per participant	4	113/225	4	Serious Risk	No Serious Inconsistency	No Serious Indirectness	No Serious Risk	Undetected	No	No	No	+++
	intestinal i. calprotectin	-47.41 (-93.28 to -1.54) µg/g	4	88/177	4
	FEV1 (% predicted)	1.36 (-1.20 to 3.91)%	5	143/284	5
COZZOLINO M 2020	body mass index	-0.25 (-0.48 to -0.03) kg/m2	7	208/416	7	Serious Risk	Very Serious Inconsistency	No Serious Indirectness	No Serious Risk	Undetected	No	No	No	+
	body weight	-0.75 (-1.45 to -0.05) kg	7	208/416	7									+
	the modi-fied Ferriman–Gallway score	-1.00 (-1.75 to -0.26)	3	90/180	3									+
	fasting plasma glucose	-3.45 (-6.03 to -0.88)	5	169/337	5									+
	Homeostatic Model Assessment of Insulin Resistance (HOMA-IR)	-2.31 (-3.84 to -0.77)	5	169/337	5									+
	Insulin-Sensitivity Check Index	-0.62 (-1.07 to -0.17)	5	169/337	5									+
	Triglycerides	-23.35 (-35.23 to -11.47)	2	60/120	2		No Serious Inconsistency		Serious Risk					++
	total testosterone serum	-0.23 (-0.36 to -0.11)	4	113/226	4		Serious Inconsistency		No Serious Risk					++
	High sensitivity C	-1.69 (-2.38 to -1.01)	4	120/240	4		No Serious Inconsistency							+++
	Nitric oxide	2.72 (0.21 to 5.23)	3	90/180	3		No Serious Inconsistency							+++
	Total antioxidant capacity	70.55 (38.84 to 102.25)	3	90/180	3		No Serious Inconsistency							+++
	Total glutathione	22.42 (2.08 to 42.75)	3	90/180	3		No Serious Inconsistency							+++
LI Y L 2021	fasting plasma glucose (FPG)	-1.35 (-2.22 to -0.49)	8	496	8	Serious Risk	Very Serious Inconsistency	No Serious Indirectness	No Serious Risk	Undetected	No	No	No	+
	fasting insulin (FINS)	-0.68 (-1.08 to -0.27)	7	216/434	7
	homeostatic model of assessment for insulin resistance (HOMA-IR)	-0.73 (-1.15 to -0.31)	7	434	7
	quantitative insulin sensitivity check index (QUICKI)	2.00 (-0.79 to 3.22)	6	189/379	6
	triglycerides (TG)	-0.85 (-1.59 to -0.11)	7	428	7
	Total cholesterol (TC)	-1.09 (-1.98 to -0.21)	7	428	7
	high-density lipoprotein cholesterol (HDL-c)	0.53 (-0.33 to 1.39)	7	428	7
	low-density lipoprotein cholesterol (LDL-c)	-0.84 (-1.64 to -0.03)	7	428	7
	very-low-density lipoprotein cholesterol (VLDL-c)	-0.44 (-0.70 to -0.18)	4	235	4		No Serious Inconsistency							+++
	Body Weight	-0.11 (-0.34 to 0.13)	12	731	12		Serious Inconsistency							++
	BMI	-0.10 (-0.30 to 0.09)	13	791	13		No Serious Inconsistency							+++
	Waist circumference (WC)	0.37 (-0.78 to 1.53)	5	316	5		Very Serious Inconsistency							+
	hip circumference (HC)	-0.25 (-0.78 to 0.27)	4	NP	4
	CRP	-0.363 (-1.37 to 0.10)	9	558	9
LV T 2021	effect of probiotics on cognition	0.24 (0.05 to 0.42)	7	NP	7	Serious Risk	No Serious Inconsistency	No Serious Indirectness	No Serious Risk	Undetected	No	No	No	+++
KRÜGER J F 2021	cognitive function in individuals with Alzheimer’s disease	0.56 (-0.06 to 1.18)	3	82/161	3	Serious Risk	Serious Inconsistency	No Serious Indirectness	No Serious Risk	Undetected	No	No	No	++
DENG H Y	cognitive enhancement	0.37 (0.14 to 0.61)	5	154/297	5	Serious Risk	No Serious Inconsistency	No Serious Indirectness	No Serious Risk	Undetected	No	No	No	+++
	total anti-oxidant capacity (TAC)	0.04 (-0.75 to 0.83)	3	82	3		Very Serious Inconsistency		Serious Risk					+
	total glutathione (GSH)	0.04 (-0.28 to 0.35)	3	82	3		No Serious Inconsistency							++
	malondialdehyde (MDA)	-0.60 (-0.91 to -0.28)	3	82	3									++
	nitric oxide (NO)	-0.16 (-0.47 to 0.15)	3	82	3									++
	high-sensitivity C-reactive protein (hs-CRP)	-0.57(-0.95 to -0.20)	2	57	2									++
SHEN T 2021	levels of Prevotellaceae	-0.37 (-0.62 to -0.11)	9	592/1038	NP	Serious Risk	Serious Risk	No Serious Indirectness	No Serious Risk	Undetected	No	No	No	++
	Faecalibacterium	-0.41 (-0.57 to -0.24)	5	422/663
	Lachnospiraceae	-0.34 (-0.59 to -0.09)	7	592/997
	Bifidobacteriaceae	0.38 (0.12 to 0.63)	7	630/1080
	Ruminococcaceae	0.58 (0.07 to 1.10)	9	499/871			Very Serious Risk							+
	Verrucomicrobiaceae	0.45 (0.21 to 0.69)	7	624/1061			Serious Risk							++
	Christensenellaceae	0.20 (0.07 to 0.34)	7	532/884			No Serious Risk							+++
MILLER L E 2017	polymorphonuclear phagocytic capacity	0.74 (0.38 to 1.11)	3	NP	1	Serious Risk	Serious Inconsistency	No Serious Indirectness	Serious Risk	Undetected	No	No	No	+
	natural killer (NK) cell tumoricidal activity	0.43 (0.08 to 0.78)	3	NP	1
BLAABJERG S 2017	the incidence of AAD	0.49 (0.36 to 0.66)	17	1832/3611	17	Serious Risk	Serious Inconsistency	No Serious Indirectness	No Serious Risk	Undetected	No	No	No	++
		0.49 (0.36 to 0.66)	4	590/1139	4		No Serious Inconsistency							+++
	Incidence of Antibiotic-Associated Diarrhea Using the Criteria Defined by WHO	0.54 (0.36 to 0.82)	7	876/1724	7									+++
	Incidence of Adverse Events	0.00 (-0.02 to 0.02)	7	1183/2363	7		Serious Inconsistency							++
	the incidence of AAD	0.42 (-0.23 to 0.77)	7	726/1446	7		Very Serious Inconsistency							+
		0.42 (-0.23 to 0.77)	9	975/1936	9		No Serious Inconsistency							+++
DALAL R 2017	All‐cause mortality	0.58(0.23 to 1.44)	7	404	NP	Serious Risk	No Serious Inconsistency	No Serious Indirectness	No Serious Risk	Undetected	No	No	No	++
	No‐recovery (incomplete resolution of clinical symptoms)	0.67(0.56 to 0.79)	10	574
	Adverse events - Overt hepatic encephalopathy	0.29(0.16 to 0.51)	10	585
	Adverse events ‐ Change of/or withdrawal from treatment	0.70(0.46 to 1.07)	9	551
	Plasma ammonia concentration (at one month)	-5.55 (-10.67 to -0.42) μmol/L	5	179/357			Serious Inconsistency							+
	Plasma ammonia concentration (at 2 months)	-5.11 (-14.56 to 4.34) μmol/L	4	109/211			Serious Inconsistency							+
	Plasma ammonia concentration	-8.29 ( -13.17, -3.41) μmol/L	10	357/705			Very Serious Inconsistency							+
CAO Q 2018	Effect on plasma ammonia levels (week 4)	−6.86 (−19.01 to 5.30) μmol/L	5	132/255	5	Serious Risk	Very Serious Inconsistency	No Serious Indirectness	No Serious Risk	Undetected	No	No	No	+
	Effect on plasma ammonia levels (week 4)	-0.80 (-1.56 to -0.08) μmol/L	4	112/220	4		No Serious Inconsistency							+++
	Reduction in serum endotoxin	-0.12 (-0.23 to -0.02)	3	58/109	3				Serious Risk					++
	Effect of probiotics on development of overt HE (week 4)	0.22 (0.07 to 0.67)	3	95/191	3				No Serious Risk					+++
	Effect of probiotics on development of overt HE (week 12)	0.48 (0.21 to 1.12)	3	104/205	3
	Improvement in Minimal hepatic encephalopathy (MHE) (week 12)	0.15 (0.07 to 0.32)	3	104/205	3
	Effect on plasma ammonia levels (week 4)	-0.33 (-5.39 to 4.74) μmol/L	4	164/325	4
DERMYSHI E 2017	Effects of Probiotics on Late-Onset Sepsis	0.88 (0.80 to 0.97)	28	4304/8535	28	Serious Risk	No Serious Inconsistency	No Serious Indirectness	No Serious Risk	Undetected	No	No	No	+++
	Effects of Probiotics on Mortality	0.77 (0.65 to 0.92)	27	4117/8156	27					Detected				++
ACETI A 2017	incidence of Late onset sepsis (LOS)	0.79 (0.71 to 0.88)	25	2934/5868	NP	Serious Risk	No Serious Inconsistency	No Serious Indirectness	No Serious Risk	Undetected	No	No	No	+++
		0.75 (0.65 to 0.86)	20	1705/3402
		0.77 (0.51 to 1.17)	16	398/800
UPADHYAY R P 2020	mean cognitive	0.20 (-1.42 to 1.83)	4	1388	4	Serious Risk	No Serious Inconsistency	No Serious Indirectness	No Serious Risk	Undetected	No	No	No	+++
	motor scores in children under 5 years of age	1.04 (-0.43 to 2.50)	4	1388	4
	the risk of cognitive impairment	0.98 (0.75 to 1.27)	4	1388	4
	the risk of motor impairment	1.06 (0.79 to 1.42)	4	1388	4
	the risk of neurodevelop-	0.90 (0.75 to 1.09)	5	1637	5
	ment impairment (NDI)
	the risk of cerebral palsy	1.33 (0.84 to 2.11)	4	1388	4
	the risk of hearing impairment	0.38 (0.14 to 1.07)	3	1139	3
JORGENSEN A 2017	improvement of rosacea-related skin symptoms	1.28 (0.98 to 1.67)	7	NP	NP	Serious Risk	Serious Inconsistency	No Serious Indirectness	No Serious Risk	Undetected	No	No	No	+
	Helicobacter pylori	1.68 (1.00 to 2.84)	14	928/2500
SHARIF S 2020	Necrotising enterocolitis (before hospital discharge)	0.54 (0.45 to 0.65)	54	10604	NP	Serious Risk	No Serious Inconsistency	No Serious Indirectness	No Serious Risk	Detected	No	No	No	++
	Mortality (all‐cause before hospital discharge)	0.76 (0.65 to 0.89)	51	10170						Undetected				+++
	Invasive infection (before hospital discharge)	0.89 (0.82 to 0.97)	47	9762
	Duration of birth hospitalisation	-1.93 (-3.78 to -0.08) days	22	5458
	neurodevelopmental impairment	1.03 (0.84 to 1.26)	5	1518
	Cerebral palsy	1.13 (0.74 to 1.72)	5	1512
	Visual impairment	0.50 (0.14 to 1.80)	4	1356
	Hearing impairment	0.46 (0.18 to 1.17)	4	1356
	Necrotising enterocolitis (before hospital discharge)	0.90 (0.68 to 1.21)	8	1712
	Mortality (all‐cause before hospital discharge)	0.91 (0.71 to 1.16)	6	1661
	Invasive infection (before hospital discharge)	0.90 (0.76 to 1.06)	6	1471
YANG Y 2014	Effect of probiotics on Stage I or higher NEC (Bell stage ≥I; gestational age <37 weeks)	0.35 (0.27 to 0.44)	27	3298/6655	27	Serious Risk	No Serious Inconsistency	No Serious Indirectness	No Serious Risk	Undetected	No	No	No	+++
	the effect of probiotics on Stage II or higher NEC(Bell Stage ≥II; gestational age <37 weeks)	0.34 (0.25 to 0.48)	17	2042/4198	17
	he influence on NEC in early preterm infants (Bell Stage ≥I; gestational age <34 weeks)	0.39 (0.27 to 0.56)	12	1266/2495	12
	mortality	0.58 (0.46 to 0.75)	14	1789/3583	14
	culture-positive sepsis	0.94 (0.83 to 1.06)	17	1950/4043	17
	age reaching full feeds	-1.66 (-3.60 to 0.27)	9	821/1621	9		Very Serious Inconsistency							+
JIANG T L 2020	The effect of probiotics in preventing stage II-III severe NEC	0.51 (0.38 to 0.67)	27	4491/8901	27	Serious Risk	No Serious Inconsistency	No Serious Indirectness	No Serious Risk	Undetected	No	No	No	+++
		0.39 (0.26 to 0.57)	11	1590/3083	11
	The effect of probiotics in decreasing death rate	0.69 (0.55 to 0.87)	27	4399/8717	27
		0.52 (0.34 to 0.80)	12	1635/3175	12
NAKAMURA H 2018	incidence of Hirschsprung-associated entero-colitis (HAEC)	0.72 (0.37 to 1.39)	5	93/198	NP	Serious Risk	No Serious Inconsistency	No Serious Indirectness	Serious Risk	Undetected	No	No	No	+
LIU D P 2020	Incidence of Bell stage ≥ II NEC	0.34 (0.25 to 0.46)	23	2359/4686	23	Serious Risk	No Serious Inconsistency	No Serious Indirectness	No Serious Risk	Undetected	No	No	No	+++
	Incidence of sepsis	0.90 (0.72 to 1.12)	10	2129	10
	Incidence of death.	0.48 (0.36 to 0.64)	20	4286	20
ZHU X L 2019	Incidence of NEC Stage ≥ II (Bell staging criteria)	0.38 (0.25to 0.58)	20	2836/5568	20	Serious Risk	No Serious Inconsistency	No Serious Indirectness	No Serious Risk	Undetected	No	No	No	+++
	Incidence of sepsis	0.87 (0.73 to 1.03)	17	2075/4034	17
	Incidence of death.	0.74 (0.60 to 0.92)	15	2579/5053	15
SUNG V 2013	infant crying/distress, measured as duration or the number of episodes	-65.10 (-85.85 to -44.38)	3	209	3	Serious Risk	No Serious Inconsistency	No Serious Indirectness	No Serious Risk	Undetected	No	No	No	+++
		-67.72 (-99.79 to -35.64)	3	209	3				Serious Risk					++
GREV J 2018	Preterm birth < 37 weeks' gestation	0.92(0.32 to 2.67)	4	518	4	Serious Risk	No Serious Inconsistency	No Serious Indirectness	No Serious Risk	Undetected	No	No	No	+++
WANG C C 2020	Newborn Birth Weight	−10.27 (−90.17 to 69.63)	7	1093	7	Serious Risk	No Serious Inconsistency	No Serious Indirectness	No Serious Risk	Undetected	No	No	No	+++
HAN M M 2019	fasting blood glucose	-0.11 (-0.16 to -0.05)mmol/L	10	1139	10	Serious Risk	No Serious Inconsistency	No Serious Indirectness	No Serious Risk	Undetected	No	No	No	+++
	serum insulin	-2.06 (-2.98 to -1.15)μU/mL	8	340/682	8
	(HOMA-IR)	-0.38 (-0.54 to -0.21）μU/mL	8	340/682	8
	QUICKI	0.01 (0.00 to 0.03)	4	165/327	4
	total cholesterol	-0.56 (-1.07 to -0.05)	6	579	6
	triglycerides	-0.66 (-1.28 to -0.04)	6	579	6
	HDL-C	-0.13 (-0.34 to 0.07)	6	579	6
	LDL-C	-0.45 (-0.97 to 0.06)	6	579	6
DAVIDSON S 2021	Diagnosis of gestational diabetes mellitus	0.80 (0.54 to 1.20)	6	1440	6	Serious Risk	No Serious Inconsistency	No Serious Indirectness	No Serious Risk	Undetected	No	No	No	+++
	Hypertensive disorders of pregnancy (including pre-eclampsia, pregnancy-induced hypertension and eclampsia)	1.39 (0.96 to 2.01)	4	955	4
	pre-eclampsia	1.85 (1.04 to 329)	4	955	4
	Caesarean section	1.00 (0.86 to 1.17)	6	1520	6
	Large-for-gestational age	0.99 (0.72 to 1.36)	4	919	4
	Perinatal mortality (including stillbirth and neonatal death)	0.33 (0.01 to 8.02)	3	709	3
	Maternal weight gain during pregnancy	0.30 (-0.67 to 1.26) kg	4	853	4
	Maternal fasting plasma glucose	-0.14 (-0.12 to 0.05) mmol/L	7	1519	7
	Maternal plasma glucose at one hour of a 75 g oral	-0.07 (-0.27 to 0.13) mmol/L	4	1110	4
	glucose tolerance test (OGTT)
	Maternal plasma glucose at two hours of a 75 g OGTT	0.02 (-0.13 to 0.18) mmol/L	4	1186	4
	Infant Stillbirth	0.59 (0.14 to 2.46)	5	1128	5
	Preterm birth (less than 37 weeks' gestation and less than 32 weeks' gestation)	1.36 (0.82 to 2.01)	6	1484	6
	Infant Macrosomia	1.13 (0.86 to 1.48)	3	952	3
	Small-for-gestational age	0.51 (0.30 to 0.85)	3	814	3
	Birthweight	26.87 (-49.52 to 103.26) g	6	1524	6
	Infant Head circumference	-0.04 (-0.27 to 0.18) cm	3	789	3
	Infant Length	0.02 (-0.54 to 0.59) cm	3	786	3
ZHANG X 2021	inducing/maintaining IBD remission	1.13 (1.02 to 1.26)	21	918/1816	21	Serious Risk	No Serious Inconsistency	No Serious Indirectness	No Serious Risk	Undetected	No	No	No	+++
	UC disease activity index	1.00 (0.27 to 1.73)	10	1026	10
	CD disease activity index	-0.33 (-1.05 to 0.38)	4	206	4
	IBD recurrence	0.48 (0.65 to 1.08)	13	1372	13					Detected				++
DERWA Y 2017	Adverse events in active UC	1.21 (0.64 to 2.27)	6	281/507	6	Serious Risk	No Serious Inconsistency	No Serious Indirectness	No Serious Risk	Undetected	No	No	No	+++
	preventing relapse in quiescent UC	1.02 (0.85 to 1.23)	3	277/555	3
	Adverse events in quiescent UC	1.09 (0.71 to 1.67)	3	277/555	3
	preventing relapse in CD in remission following a surgical resection	1.06 (0.59 to 1.92)	4	105/213	4
	prevention of endoscopic relapse of disease activity (Rutgeerts score 1 or more)	1.09 (0.92 to 1.29)	4	163/233	4				Serious Risk					++
	Endoscopic relapse of disease activity (Rutgeerts score 2 or more)	1.04 (0.82 to 1.31)	4	163/233	4				No Serious Risk					+++
	Endoscopic relapse of disease activity (Rutgeerts score 3 or more)	1.13 (0.84 to 1.52)	4	163/233	4
	Adverse events in CD in remission following a surgical resection	0.81 (0.61 tp 1.08)	3	129/263	3
PABON-CARRASCO M 2020	Efficacy of probiotics in inducing remission in active UC	0.81 (0.72 to 0.91)	9	362/759	9	Serious Risk	No Serious Inconsistency	No Serious Indirectness	No Serious Risk	Undetected	No	No	No	+++
	Efficacy of probiotics in preventing relapse in quiescent UC	0.89 (0.68 to 1.15)	3	147/284	3
	Efficacy of the Probiotics for the Remission of Crohn’s Disease	0.90 (0.77 to 1.06)	5	253/494	5
FORD A C 2018	effect on persistence of symptoms	0.79 (0.68 to 0.91)	21	1931	21	Serious Risk	No Serious Inconsistency	No Serious Indirectness	No Serious Risk	Detected	No	No	No	++
		0.82 (0.63 to 1.06)	8	893	8
		0.67 (0.51 to 0.87)	3	314	3
		0.70 (0.48 to 1.01)	3	528	3
	ffect on global symptom or abdominal pain scores	-0.31 (-0.44 to -0.17)	19	1341	19
		-0.09 (-0.25 to 0.036)	9	989	9
		0.12 (-0.27 to 0.50)	4	388	4
		-0.46 (-0.92 to 0.00)	3	501	3
	bloating scores	-0.15 (-0.31 to 0.01)	17	1155	17
		-0.30 (-0.68 to 0.09)	3	501	3
		-0.01 (-0.36 to 0.34)	3	209	3
	flatulence symptom scores	-0.29 (-0.51 to -0.07)	8	318	8
	any adverse event	1.09 (0.91 to 1.29)	36	4183	36
ASHA M Z 2020	global symptom scores	-0.23 (-0.44 to -0.02)	17	2401	17	Serious Risk	No Serious Inconsistency	No Serious Indirectness	No Serious Risk	Undetected	No	No	No	+++
	abdominal pain scores	-0.18 (-0.43 to 0.07)	29	3688	29
		-0.71 (-1.33 to -0.10)	5	660	5
XU H L 2021	Abdominal pain score	-1.15 (-2.05 to -0.24)	7	508	7	Serious Risk	No Serious Inconsistency	No Serious Indirectness	No Serious Risk	Undetected	No	No	No	+++
	Abdominal pain treatment success	3.44 (1.73 to 6.87)	3	163	3				Serious Risk					++
	Abdominal pain relief	1.48 (0.96 to 2.28)	3	167	3				Serious Risk					++
	Frequency of abdominal pain	-0.82 (-1.57 to -0.07)	3	147	3				Serious Risk					++
	Standard abdominal pain	-0.15 (-0.27 to -0.04)	6	508	6				No Serious Risk					+++
CONNELL M 2018	Abdominal pain	0.03 (-0.22 to 0.29)	5	243	5	Serious Risk	No Serious Inconsistency	No Serious Indirectness	No Serious Risk	Undetected	No	No	No	+++
	Stool consistency	-0.00 (-0.09 to 0.08)	3	177	3				Serious Risk					++
	Overall response	1.39 (0.98 to 1.96)	3	177	3				Serious Risk					++
	Abdominal bloating	0.15 (-0.11 to 0.40)	5	243	5				No Serious Risk					+++
	Quality of Life	-0.08 (-0.39 to 0.22)	3	170	3				Serious Risk					++
YUAN F Q 2017	Abdominal pain	0.25 (-0.27 to 0.77)	3	554	3	Serious Risk	No Serious Inconsistency	No Serious Indirectness	No Serious Risk	Undetected	No	No	No	+++
		0.23 (-0.03 to 0.49)	5	666	5
	Bloating/distention	0.20 (-0.19 to 0.58)	3	554	3
		0.21 (0.07 to 0.35)	5	666	5
	Bowel habit satisfaction	0.66 (-0.11 to 1.43)	3	554	3
WEN Y 2020	Effect of probiotics on gut transit time for constipation-predominant irritable bowel syndrome (IBS-C)	1.29 (0.69 to 1.89)	10	1039	10	Serious Risk	No Serious Inconsistency	No Serious Indirectness	Very Serious Risk	Undetected	No	No	No	+
	Effect of probiotics on stool consistency for IBS-C	0.55 (0.27 to 0.82)	9	NP	9				Very Serious Risk					+
		0.46 (0.08 to 0.85)	4	NP	4				Serious Risk					++
	Satisfaction in relief	0.95 (0.77 to 1.18)	3	315	3				No Serious Risk					+++
	Bloating	-0.77 (-1.46 to -0.07)	4	460	4				Serious Risk					++
	Flatulence	-0.34 (-0.70 to 0.02)	3	158	3				No Serious Risk					+++
	Incomplete evacuation	-0.77 (-1.14 to -0.39)	6	502	6				No Serious Risk					+++
	Hard stools	-0.74 (-1.19 to -0.28)	5	280	5
	Ease of expulsion	0.81 (0.15 to 1.48)	4	392	4
KHALESI S 2018	serum ALT concentrations	-8.05 (-13.07 to -3.04) IU/L	16	990	NP	Serious Risk	Very Serious Inconsistency	No Serious Indirectness	No Serious Risk	Undetected	No	No	No	+
	serum AST concentrations	-7.79 (-13.93 to -1.65)IU/L	16	990			Very Serious Inconsistency							+
	serum ALP level	-0.27 (-4.00 to 3.47)IU/L	6	518			Serious Inconsistency							+
	serum GGT levels	-8.40 (-12.61 to -4.20)IU/L	8	438			Serious Inconsistency							+
	serum levels of albumin	-0.29 ( -0.74 to 0.16)	11	662			No Serious Inconsistency							++
	serum bilirubin level	0.95 (0.48 to 1.42)μmol/L	13	806			No Serious Inconsistency							++
HERNANDEZ-SAAVEDRA D 2018	Effect on body mass index	-0.39 ( -0.49 to -0.29) kg/m2	20	NP	20	Serious Risk	Very Serious Inconsistency	No Serious Indirectness	No Serious Risk	Undetected	No	No	No	+
	ALT	-7.31 (-9.89 to -4.74) U/L	27		27
	AST	-4.94 (-6.89 to -2.98) U/L	25		25
	γ-GT	-7.86 (-11.36 to -4.36) U/L	9		9
	TNF-α	-2.04 (-4.70 to 0.61) ng/mL	6		6
	hepatic cytokine CRP	-0.74 (-1.85 to 0.37) mg/	6		6
		L
	total serum CHOL	-7.97 (-11.41 to -4.54) mg/dL	15		15
	Serum LDL-c	-3.81 (-8.31 to 0.69) mg/dL	12		12
	HDL-c	0.56 (-1.55 to 2.67)	12		12
	Circulating TAG	-8.28 (-16.35 to -0.22)	16		16
KHAN M Y 2019	Liver stiffness as measured by the fibro scan	-0.62 (-0.89 to -0.35)	4	217	4	Serious Risk	Very Serious Inconsistency	No Serious Indirectness	No Serious Risk	Undetected	No	No	No	+
	necrosis factor-α	-0.59 (-1.34 to 0.16)	6	276	6									+
	LDL	-0.48 (-1.04 to -0.08)	7	316	7									+
	HDL	-0.03 (-0.29 to 0.23)	7	316	7		No Serious Inconsistency							+++
	total cholesterol level.	-0.48 (-0.94 to -0.01)	8	391	8		Very Serious Inconsistency							+
	triglycerides level.	-0.23 (-0.48 to 0.03)	8	391	8		No Serious Inconsistency							+++
	insulin resistance	-0.12 (-0.63 to 0.40)	6	289	6		Very Serious Inconsistency							+
	fasting blood sugar leve	-0.47 (-1.02 to 0.08)	6	305	6		Very Serious Inconsistency							+
	high-sensitivity C-reactive protein level	-0.45 (-0.76 to -0.15)	4	234	4		No Serious Inconsistency							+++
SAWAS T 2015	Infections Rate	0.21 (0.11 to0.41)	4	246	NP	Serious Risk	No Serious Inconsistency	No Serious Indirectness	No Serious Risk	Undetected	No	No	No	++
	urinary tract infection (UTI)	0.14 (0.04 to 0.47)	4	246
	intra-abdominal infection	0.27 (0.09 to 0.78)	4	246
	length of hospital stay	-1.41 (-1.97 to -0.86) days	3	196
	duration of antibiotic use	-3.89 (-4.17 to -3.60) days	3	196			Very Serious Inconsistency							+
	Acute graft rejection	0.73 (0.44 to 1.22)	3	179			No Serious Inconsistency							++
YANG Z 2017	postoperative infection rate	0.35 (0.24 to 0.50)	23	1696	23	Serious Risk	No Serious Inconsistency	No Serious Indirectness	No Serious Risk	Detected	No	No	No	++
	pneumonia	0.44 (0.28 to 0.68)	16	1276	16					Undetected				+++
	urinary tract infection	0.30 (0.16 to 0.55)	13	1151	13					Undetected				+++
	wound infection	0.58 (0.42 to 0.80)	18	1723	18					Detected				++
	intra-abdominal abscess	0.65 (0.28 to 1.55)	10	495	10					Undetected				+++
	Postoperative mortality	1.19 (0.52 to 2.74)	8	1648	8					Undetected				+++
	lengths of hospital stay	-3.20 (-4.87 to -1.54) days	12	807	12		Very Serious Inconsistency			Detected				+
	antibiotic therapy	-3.40 (-4.67 to -2.13)	11	922	11		Very Serious Inconsistency			Undetected				+
	ICU stay	-0.46 (-1.07 to 0.14)	7	453	7		Serious Inconsistency			Undetected				++
WU X D 2018	the incidence of SSI	0.72 (0.56 to 0.92)	13	1374	13	Serious Risk	No Serious Inconsistency	No Serious Indirectness	No Serious Risk	Undetected	No	No	No	+++
	incidence of diarrhea	0.51 (0.37 to 0.70)	4	404	4
	abdominal distention	0.63 (0.48 to 0.83)	5	394	5
	pneumonia	0.50 (0.29 to 0.84)	10	807	10
	urinary tract infection	0.50 (025 to 0.98)	8	705	8
	cumulative duration of antibiotic therapy	-1.24 (-1.61 to -0.86) days	5	504	5
	length of stay	-1.16 (-1.91 to -0.41) days	7	514	7
	the incidence of SSI	0.72 (0.56 to 0.92)	13	1374	13
SKONIECZNA-ZYDECKA K 2018	CRP	-0.40 (-0.79 to -0.02)	6	NP	6	Serious Risk	No Serious Inconsistency	No Serious Indirectness	No Serious Risk	Undetected	No	No	No	+++
	IL-6	-0.41 (-0.70 o -0.12)	4		4
	white blood cells (WBC)	-0.60 (-1.45 to 0.24)	6		6
	lactulose/mannitol (L/M) ratio	-0.28 (-0.82 to 0.27)	4		4
	the concentration of butyrate ratio	0.67 (0.37 to 0.97)	4		4
	short chain fatty acids (SCFAs)–acetic	1.78 (0.80 to 2.76)	4		4
	propionic acids	0.46 (0.18 to 0.73)	4		4
	prevention of bacterial translocation	0.75 (0.46 to 1.21)	7		7
	pneumonia	0.55 (0.38 to 0.80)	21		21
	surgical site infection	0.55 (0.39 to 0.78)	10		10
	Abdominal distention	0.64 (0.47 to 0.86)	4		4
	Anastomotic leakage	0.73 (0.43 to 1.24)	9		9
	Deep organ space	0.62 (0.31 to 1.25)	5		5
	Diarrhea	0.49 (0.37, 0.67)	7		7
	Intraabdominal abscess	0.69 (0.35 to 1.37)	8		8
	Mortality	1.17 (0.5 4 to 2.5 7 )	7		7
	MRSA infection	0.34 (0.11 to 1.06)	4		4
	Peritonitis	0.34 (0.09 to 1.3 2 )	4		4
	Reoperation	0.43 (0.14 to 1.29)	3		3
	Sepsis	0.69 (0.58, 0.81)	7		7
	Superficial incisional	0.53 (0.38 to 0.74)	15		15
	UTI	0.32 (0.18 to 0.57)	13		13
	Blood loss	0.004 (-0.120 to 0.128)	7		7
	Duration of antibiotic therapy	-0.60 (-1.09 to -0.10)	10		10		Very Serious Inconsistency							+
	Duration of postoperative pyrexia	-0.44 (-0.68 to -0.192	4		4		No Serious Inconsistency							+++
	Fluid diet	-0.35 (-0.58 to -0.12)	3		3
	Hospital stay	-0.48 (-0.66, -0.30)	10		10
	ICU stay	-0.10 (-0.36, 0.16)	4		4
	Operating time	0.02 (-0.14 to 0.18)	11		11
	Solid diet	-0.31 (-0.50, -0.12)	4		4
MILAJERDI A 2020	hs-CRP	-0.39 (-0.50 to -0.28)	31	NP	31	Serious Risk	Very Serious Inconsistency	No Serious Indirectness	No Serious Risk	Undetected	No	No	No	+
	serum IL-6	-0.37 (-0.51 to -0.24)	16		16		Serious Inconsistency							++
	serum TNF-a concentrations	-0.21 (-0.34 to -0.08)	18		18		Very Serious Inconsistency							+
	serum Interleukin-10 (IL-10)	0.21 (0.04 to0.38)	11		11
	serum interleukin-1 beta (IL-1β)	-0.17 (-0.37 to 0.02)	9		9
	serum IL‑12	-0.47 (-0.67 to -0.27)	8		8
	serum IL-8	-0.01 (-0.30 to 0.28)	5		5		Serious Inconsistency							++
	Interferon-gama (IFN-γ)	-0.08 (-0.31 to 015)	5		5		No Serious Inconsistency							+++
	IL-17	006 (-0.34 to 0.46)	3		3
	IL-4	-0.48 (-0.76 to -0.20)	3		3
MILLER L E 2016	intestinal transit time (ITT)	0.38 (0.23 to 0.53)	17	NP	17	Serious Risk	No Serious Inconsistency	No Serious Indirectness	No Serious Risk	Undetected	No	No	No	+++
ZHONG C Q 2017	the incidence of small intestinal bacterial overgrowth (SIBO)	0.54 (0.19 to 1.52)	3	NP	3	Serious Risk	No Serious Inconsistency	No Serious Indirectness	No Serious Risk	Undetected	No	No	No	++
	SIBO Decontamination Rate	1.61 (1.19 to 2.17)	5		5
	H2 Volume in HBT	-36.35 (-44.23 to -28.47) ppm	4		2
	stool frequency	-0.09 (-0.47 to 0.29)	4		3
LIU B 2018	alleviating anxiety	-0.12 (-0.28 to 0.04)	12	1551	12	Serious Risk	Serious Inconsistency	No Serious Indirectness	No Serious Risk	Undetected	No	No	No	++
MCKEAN J 2017	Preclinical psychological symptoms of anxiety, depression, and stress	0.34 (0.07 to 0.61)	9	785	9	Serious Risk	Serious Inconsistency	No Serious Indirectness	No Serious Risk	Undetected	No	No	No	++
GOH K K 2019	depressive symptoms	-0.31 (-0.56 to -0.07)	19	1901	19	Serious Risk	Very Serious Inconsistency	No Serious Indirectness	No Serious Risk	Undetected	No	No	No	+
		-0.75 (-1.09 to -0.41)	3	144	3		No Serious Inconsistency		Serious Risk					++
		-0.26 (-0.70 to -0.17)	7	722	7		Very Serious Inconsistency		No Serious Risk					+
		-0.25 (-0.60 to 0.11)	12	1035	12		Very Serious Inconsistency							+
		-0.01 (-0.30 to 0.27)	11	1070	11		Serious Inconsistency							++
		-0.57 (-0.96 to -0.18)	13	831	13		Very Serious Inconsistency							+
PAN H D 2017	disease activity score in 28 joints (DAS28)	-0.11 (-0.47 to 0.24)	3	132	3	Serious Risk	Very Serious Inconsistency	No Serious Indirectness	Serious Risk	Undetected	No	No	No	+
	CRP	-0.77 (-1.48 to -0.05) mg/L	4	153	4		Very Serious Inconsistency							+
	TNF-α	-1.35 (-1.99 to -0.71)	3	118	3		No Serious Inconsistency							++
	IL-6	-8.69 (-27.32 to 9.94)	3	118	3		Serious Inconsistency							+
	IL-1β	-6.13 (-11.41 to -0.86)	3	118	3		Serious Inconsistency							+
	IL-10.	0.63 (-0.05 to 1.31)	3	118	3		No Serious Inconsistency							++
NG Q X 2019	schizophrenia symptoms (total PANSS score)	-0.09 (-0.38 to 0.20)	3	172	3	Serious Risk	No Serious Inconsistency	No Serious Indirectness	Serious Risk	Undetected	No	No	No	++
Le Morvan De Sequeira 2021	quality-of-life (QoL)	0.36 (0.07 to 0.64)	11	1501	11	Serious Risk	No Serious Inconsistency	No Serious Indirectness	No Serious Risk	Undetected	No	No	No	+++
FU Y S 2020	CD4 counts	3.86 (-24.72 to 32.45)	16	1025	16	Serious Risk	Serious Inconsistency	No Serious Indirectness	No Serious Risk	Undetected	No	No	No	++
ZHANG X L 2021	CD4 counts	21.24 (-12.95 to 55.39)	10	385	NP	Serious Risk	No Serious Inconsistency	No Serious Indirectness	No Serious Risk	Undetected	No	No	No	++
	probiotic	0.60 (0.44 to 0.82)	6	360
LEI W T 2017	seroprotection rate of H1N1 strain	1.83 (1.19 to 2.82)	6	386	6	Serious Risk	No Serious Inconsistency	No Serious Indirectness	No Serious Risk	Undetected	No	No	No	+++
	seroconversion rate of H1N1 strain	0.52 (0.75 to 3.09)	6	553	6		Serious Inconsistency							++
	seroprotection rate of H3N2 strain	2.85 (1.59 to 5.10)	7	388	7		No Serious Inconsistency							+++
	seroconversion rate of H3N2 strain	2.54 (0.93 to 6.91)	6	553	6		Serious Inconsistency							++
	seroprotection rate of B strain	0.99 (065 to 1.52)	7	389	7		No Serious Inconsistency							+++
	seroconversion rate of B strain	2.11 (1.38 to 3.21)	6	553	6		No Serious Inconsistency							+++
YEH T L 2018	hemagglutination inhibition titers of A/H1N1 strain after influenza vaccination	7.14 (2.73 to 11.55)	12	688	NP	Serious Risk	Very Serious Inconsistency	No Serious Indirectness	No Serious Risk	Undetected	No	No	No	+
	hemagglutination inhibition titers of A/H3N2 strain after influenza vaccination	17.19 (3.39 to 30.99)	12	688
	hemagglutination inhibition titers of B strain after influenza vaccination	4.17 (0.37 to 7.96)	12	688
	the incidence of adverse effect	0.80 (0.43 to 1.50)	10	762			No Serious Inconsistency							++
TAVAKOLY R 2021	lymphocyte T cell count	0.00 (-0.03 to 0.02) cells*109/L	4	NP	4	Serious Risk	Very Serious Inconsistency	No Serious Indirectness	No Serious Risk	Detected	No	No	No	+
	T helper	0.00 (-0.07 to 0.07) cells*109/L	5		5		No Serious Inconsistency							++
	T cytotoxic	-0.08 (-0.15 to -0.01) cells*109/L	5		5		Serious Inconsistency			Undetected				+
	lymphocyte B	0.01 (-0.07 to 0.09)	9		9		No Serious Inconsistency							+++
	Lymphocyte	0.01 (-0.05 to 0.08)	5		5
	NK cells	0.04 (-0.01 to 0.08)	4		4
	leukocyte	0.23 (-0.09 to 0.55)	10		10
	monocyte	-0.00 (-0.03 to 0.02)	8		8
	neutrophil cells count	0.14 (-0.06 to 0.33)	7		7
	IgM	-0.22 (-0.63 to 0.19)	3		3
	IgA	0.24 (-0.09 to 0.57)	4		4
	IgA secretion rate	4.21 (-8.35 to16.77)	3		3
ASKARI G 2021	The efficacy of syn and probiotics on hs-CRP	-0.58 (-0.79 to-0.37)	8	359	NP	Serious Risk	No Serious Inconsistency	No Serious Indirectness	No Serious Risk	Undetected	No	No	No	++
	IL-10	-0.12 (-2.11 to 1.87) pg/ml	5	184			Very Serious Inconsistency		Serious Risk					+
	IL-6	-7.79 (-13.81 to -1.77) pg/ml	6	214					No Serious Risk					+
	TNF-α	-1.05 (-2.01 to -0.10) pg/ml	5	184					No Serious Risk					+
	ESR	3.05 (-7.60 to 13.7) mm/h	3	90			Serious Inconsistency		Serious Risk					+
	GSH	1311 (-55.68 to 81.91) μmol/L	4	222			Very Serious Inconsistency		No Serious Risk	Detected				+
	MDA	-0.36 (-0.68 to -0.04)	5	268			No Serious Inconsistency							+
	TAC	0.08 (-0.16 to -0.32)	5	268						Undetected				++
	HOMA-IR	-0.71 (-1.05 to -0.37)	4	222										++
	HOMA-β	-15.18 (-22.08 to -8.28)	3	174					Serious Risk					+
JIA L P 2018	serum creatinine	0.08 (-0.13 to 0.28) mg/dL	5	126	5	Serious Risk	No Serious Inconsistency	No Serious Indirectness	Serious Risk	Undetected	No	No	No	++
	blood urea	-1.38 (-9.26 to 6.50)	3	164	3
	p-cresyl sulfate	-0.57 (-0.99 to -0.14)	3	125	3
	hemoglobin	0.21 (-0.48 to 0.91)	3	93	3
	IL-6	0.37 (0.03 to 0.72)	3	134	3
	CRP	0.49 (-6.45 to 3.11)	3	NP	3
TAO S 2019	urea	-8.17 (-24.57 to 8.23)	6	259	6	Serious Risk	Serious Inconsistency	No Serious Indirectness	No Serious Risk	Undetected	No	No	No	++
	uric acid	-0.43 (-1.19 to 0.33)	3	131	3				Serious Risk					+
	C-reactive protein	-0.48 (-1.29 to 0.33)	6	227	6				No Serious Risk					++
	creatinine	-0.18 (-0.82 to 0.47)	6	259	6									++
	estimated glomerular filtration rate preservation	2.10 (-1.31 to 5.52)	4	212	4					Detected				+
THONGPRAYOON C 2019	serum C-reactive protein	-0.37 (-0.72 to 0.03)	7	178	NP	Serious Risk	Serious Inconsistency	No Serious Indirectness	Serious Risk	Undetected	No	No	No	+
BAKHTIARY M 2021	total cholesterol	-0.25 (-0.46 to -0.04)	7	NP	7	Serious Risk	No Serious Inconsistency	No Serious Indirectness	No Serious Risk	Strongly Suspected	No	No	No	++
	HDL levels	-0.01 (-0.62 to 0.60)	6		6		Very Serious Inconsistency							+
	LDL	-0.19 (-0.49 to 0.10)	6		6		No Serious Inconsistency							++
	triglyceride	-0.10 (-0.33 to 0.12)	7		7
	VLDL	-0.21 (-0.47 to 0.05)	4		4
	Fasting blood glucose (FBG )	-0.41 (-0.65 to -0.17)	5		5
	homeostatic model assessment of insulin resistance (HOMA-IR)	-0.63 (-0.95 to -0.30)	5		5
	insulin levels	-0.49 (-0.90 to -0.08)	5		5		Serious Inconsistency							+
	quantitative insulin sensitivity check index (QUICKI)	0.78 (0.51 to 1.05 )	4		4		No Serious Inconsistency							++
	hs-CRP	-0.52 (-0.81 to -0.22)	8		8		Serious Inconsistency							+
	CRP	0.21 (-0.17 to 0.59)	4		4		No Serious Inconsistency							++
	IL-6	-0.30 (-0.84 to 0.23)	4		4		Serious Inconsistency							+
	Malondialdehyde	-0.79 (-1.22 to -0.37)	6		6		Serious Inconsistency							+
	total antioxidant capacity	0.42 (0.18 to 0.66)	5		5		No Serious Inconsistency							++
	glutathione	0.52 (0.19 to 0.86)	4		4
	nitric oxide	0.06 (-0.20 to 0.32)	4		4
	BMI	0.05 (-0.17 to 0.27)	6		6
MCFARLANE C 2019	eGFR, estimated glomerular filtration rate	0.34 (-2.20 to 2.89 mL/min/1.73 m2	3	132	NP	Serious Risk	No Serious Inconsistency	No Serious Indirectness	Serious Risk	Undetected	No	No	No	+
	serum urea	-0.30 (-2.20 to 1.61) mmol/L	9	345			Serious Inconsistency		No Serious Risk					+
	Serum indoxyl sulfate	-0.02 (-0.09 to 0.05) mg/dL	4	144			No Serious Inconsistency		Serious Risk					+
	serum PCS	-0.13 (-0.41 to 0.15) mg/dL	4	144										+
	weight	0.40 (-0.95 to 1.74) kg	7	357					No Serious Risk					++
HASAIN Z 2021	fasting plasma glucose	-3.10 (-5.11 to -1.09) mg / dL	9	594	9	Serious Risk	Serious Inconsistency	No Serious Indirectness	No Serious Risk	Undetected	No	No	No	++
	insulin	-2.17 (-3.55 to -0.79) µIU/mL	7	450	7									++
	HOMA, homeostasis model assessment index	-0.56 (-0.86 to -0.26)	7	450	7									++
	QUICKI, quantitative insulin sensitivity check index	0.01 (0.00 to 0.01)	4	221	4		No Serious Inconsistency							+
	total cholesterol level	-3.60 (-16.26 to 9.07) mg/dL	4	265	4		Serious Inconsistency							++
	high-density lipoprotein cholesterol	-1.25 (-5.48 to 2.99) mg/dL	4	265	4		No Serious Inconsistency							+++
	low-density lipoprotein cholesterol level	-6.36 (-14.89 to 2.16) mg/dL	4	265	4									+++
	triglycerides levels	-10.40 (-24.68 to 3.89)mg/dL	4	265	4									+++
	high-sensitivity C-reactive protein (hs-CRP)	-1.37 (-1.94 to -0.81) mg/L	4	275	4									+++
	nitric oxide (NO)	2.42 (0.80 to 4.04) µmol/L	3	165	3				Serious Risk					++
	malondialdehyde (MDA)	-0.77 (-0.99 to -0.56) µmol/L	4	221	4				No Serious Risk					+++
	glutathione (GSH)	13.73 (-35.84 to 63.31) µmol/L	3	165	3				Serious Risk					++
	total antioxidant capacity (TAC)	93.46 (-7.31 to 194.22) mmol/L	3	165	3		Very Serious Inconsistency		Serious Risk					+
	incidence of pre-eclampsia	0.89 (0.32 to 2.46)	3	217	3		No Serious Inconsistency		No Serious Risk					+++
	gestational age at delivery	0.04 (-0.30 to 0.38) week	4	301	4									+++
	the likelihood of cesarean delivery	0.66 (0.34 to 1.29)	4	301	4									+++
	macrosomia	0.42 (0.19 to 0.94)	5	361	5									+++
	newborns’ hospitalization	0.37 (0.18 to 0.74)	4	301	4									+++
	babies with hypoglycemia at birth	0.68 (0.28 to 1.64)	3	174	3				Serious Risk					++
BOCK P M 2021	HbA1c	-2.17 (-4.37 to 0.03) mmol/mol	12	717	NP	Serious Risk	Serious Inconsistency	No Serious Indirectness	No Serious Risk	Undetected	No	No	No	++
	fasting blood glucose	-0.58 (-0.86 to -0.30) mmol/l	36	1982
	insulinaemia	-10.51 (-16.68 to -4.33) pmol/l	21	1194
	BMI	-0.06(-0.53 to 0.41) kg/m2	NP	NP			No Serious Inconsistency							+++
	total cholesterol	-0.14 (-0.26 to -0.02) mmol/l	27	1524
	triacylglycerol	-0.11 (-0.20 to -0.02) mmol/l	29	1619
	HDL-cholesterol	0.04 (0.01 to 0.07) mmol/l	29	1619
	LDL-cholesterol	-0.05 (-0.14 to 0.05) mmol/l	27	1531
ZHENG H J 2019	hs-CRP	-0.38 (-0.51 to -0.24)	13	NP	13	Serious Risk	Serious Risk	No Serious Indirectness	No Serious Risk	Undetected	No	No	No	++
	TAC	0.31 (0.09 to 0.52)	13		13
	MDA	-0.61 (-0.89 to -0.32)	10		10					Detected				+
	NO	0.62 (0.25 to 0.99)	8		8		Very Serious Risk							+
	GSH	0.41 (0.26 to 0.55)	11		11		Serious Risk			Undetected				++
HENDIJANI F 2018	Systolic blood pressure	-0.93 (-1.58 to -0.27)	6	NP		Serious Risk	Very Serious Inconsistency	No Serious Indirectness	No Serious Risk	Undetected	No	No	No	+
	Diastolic blood pressure	-0.88 (-1.76 to -0.01)	7
TAO Y 2020	HbA1c	-0.24 (-0.44 to -0.04) %	8	489	8	Serious Risk	No Serious Inconsistency	No Serious Indirectness	No Serious Risk	Undetected	No	No	No	+++
	FBG	-0.44 (-0.74 to -0.15) mmol/L	14	842	14
	HOMA-IR	-1.07 (-1.58 to -0.56)	8	524	8					Detected				++
DU X Z 2019	the risk of developing asthma	0.86 (0.73 to 1.01)	14	4138	14	Serious Risk	No Serious Inconsistency	No Serious Indirectness	No Serious Risk	Undetected	No	No	No	+++
	Allergic rhinitis	1.03 (0.77 to 1.39)	5	1897	5		Serious Inconsistency							++
	Wheeze	0.94 (0.81 to 1.08)	8	1957	8		No Serious Inconsistency							+++
	Positive aeroallergen skin-prick test (SPT) result	0.74 (0.50 to 1.09)	4	870	4									+++
ZHANG N 2020	Subjective stress level	-0.14 (-0.27 to -0.01)	6	1043	6	Serious Risk	No Serious Inconsistency	No Serious Indirectness	No Serious Risk	Undetected	No	No	No	+++
	Stress-related subthreshold anxiety/depression level	-0.13 (-0.26 to -0.00)	9	940	9
CHI C 2020	systolic blood pressure	-2.05 (-3.87 to -0.24)	11	628	11	Serious Risk	No Serious Inconsistency	No Serious Indirectness	No Serious Risk	Undetected	No	No	No	+++
	diastolic blood pressure	-1.26 (-2.51 to -0.00)	12	688	12
	BMI	-1.03 (-1.28 to -0.79)	8	398	8
	blood glucose	-0.18 (-0.30 to -0.05)	4	186	4
ZHANG C 2020	Stool frequency	0.98 (0.39 to 1.56)	15	1189	15	Serious Risk	Very Serious Inconsistency	No Serious Indirectness	No Serious Risk	Undetected	No	No	No	+
	Gut transit time	-13.75 (-21.93 to -5.56)	5	325	5		Serious Inconsistency							++
	Stool consistency	1.30 (0.22 to 2.38)	6	386	6		Very Serious Inconsistency							+
	Bloating	-0.24 (-0.55 to 0.07)	4	282	4		No Serious Inconsistency							+++
HUANG R 2017	stool frequency	0.73 (0.14 to 1.31)	6	444	6	Serious Risk	Very Serious Inconsistency	No Serious Indirectness	No Serious Risk	Undetected	No	No	No	+
	stool consistency	-0.07 (-0.21 to 0.06)	3	267	3
SEILER C L 2020	Number of adverse events, dichotomous outcome	-0.00 (-0.03 to 0.03)	6	279	6	Serious Risk	No Serious Inconsistency	No Serious Indirectness	No Serious Risk	Undetected	No	No	No	+++
	gastrointestinal symptoms (any questionnaire), continuous outcome	-0.48 (-1.21 to 0.25)	4	197	4		Very Serious Inconsistency							+
	Change in bifidobacteria species (log colony-forming units per gram [CFU/g]) from baseline to end of study, continuous outcome	0.85 (0.38 to 1.32)	4	224	4		Serious Inconsistency							++
	Change in lactobacilli species (log CFU/g) from baseline to end of study, continuous outcome	1.13 (-0.67 to 2.93)	4	224	4		Very Serious Inconsistency							+
HADI A 2021	Weight	-1.54 (-4.83 to 1.75) kg	5	NP	5	Serious Risk	No Serious Inconsistency	No Serious Indirectness	No Serious Risk	Undetected	No	No	No	+++
	BMI	-0.06 (-0.56 to 0.44) kg/m2	7		7
	WC	-1.33 (-3.30 to 0.64) cm	6		6
	FBS	-2.28 (-7.37 to 2.80) mg/dL	8		8		Very Serious Inconsistency							+
	HOMA-IR	-0.07 (-0.63 to 0.49)	6		6		Serious Inconsistency							++
	Insulin	-0.25 (-0.56 to 0.07)	7		7		No Serious Inconsistency							+++
	TC	-6.66 (-13.25 to 0.07) mg/dL	7		7									+++
	TG	-3.15 (-24.59 to 18.29)mg/dL	7		7		Serious Inconsistency							++
	LDL-c	-6.60 (-14.41 to 1.21) mg/dL	7		7		Serious Inconsistency							++
	HDL-c	0.27 (-2.80 to 3.34) mg/dL	7		7		Very Serious Inconsistency							+
ZHANG J 2020	functional dyspepsia (FD) symptom improvement	1.15 (1.01 to 1.30)	5	409	5	Serious Risk	No Serious Inconsistency	No Serious Indirectness	No Serious Risk	Undetected	No	No	No	+++
SUN S Y 2021	eczema	0.59 (0.45 to 0.78)	17	4011	17	Serious Risk	Serious Inconsistency	No Serious Indirectness	No Serious Risk	Undetected	No	No	No	++
	atopic eczema	0.66 (0.48 to 0.91)	6	1193	6		No Serious Inconsistency							+++
	asthma	0.88 (0.69 to 1.10)	12	3209	12
	rhinitis	0.83 (0.55 to 1.24)	5	1214	5
	wheeze	0.82 (0.67 to 1.01)	8	1922	8
	allergic disease	0.83 (0.58 to 1.17)	5	1556	5
	sensation	0.99 (0.75 to 1.30)	7	1174	7
BOYLE R J 2009	Self-assessed eczema symptoms on a 20-point visual analogue scale of itch and sleep disturbance (SCORAD part C	-0.90 (-2.84 to 1.04)	5	309	5	Serious Risk	Very Serious Inconsistency	No Serious Indirectness	No Serious Risk	Undetected	No	No	No	+
	nvestigator-rated eczema severity (total SCORAD) at the end of treatment	-2.46 (-7.45 to 2.53)	7	588	7
LOSURDO G 2018	eradication of H. pylori	7.91 (2.97 to 21.05)	6	352	6	Serious Risk	No Serious Inconsistency	No Serious Indirectness	No Serious Risk	Detected	No	No	No	++
JI T 2020	V entilator-associated pneumonia (VAP) Incidence	0.67 (0.59 to 0.77)	20	2428	20	Serious Risk	No Serious Inconsistency	No Serious Indirectness	No Serious Risk	Undetected	No	No	No	+++
	length of ICU stay	-1.42 (-2.52 to -0.31)	15	1895	15		Very Serious Inconsistency							+
	length of hospital stay	-1.79 (-3.89 to -0.31)	8	1161	8		Very Serious Inconsistency							+
	mortality rates	0.83 (0.70 to 1.02)	15	1959	15		No Serious Inconsistency							+++
	days of MV	-1.06 (-2.54 to 0.43)	12	1563	12		Very Serious Inconsistency							+
	Days of using antibiotics	-2.28 (-4.02 to -0.55)	5	664	5		Serious Inconsistency							++
	the onset of VAP following intubation	2.09 (-0.15 to 4.32)	4	265	4		Very Serious Inconsistency							+
	oropharyngeal colonization	0.87 (0.76 to 0.99)	6	915	6		No Serious Inconsistency							+++
	gastric colonization	0.65 (0.49 to 0.84)	4	519	4		No Serious Inconsistency							+++
	rate of gram-negative (GN) bacteria positivity	0.58 (0.58 to 0.86)	9	1247	9		Serious Inconsistency							++
	positive rate of gram-positive bacteria culture	0.95 (0.67 to 1.35)	8	1175	8		No Serious Inconsistency							+++
	positive fungal culture rates	0.98 (0.67 to 1.43)	7	886	7		No Serious Inconsistency							+++
	rate of multidrug resistant (MDR) infections	0.64 (0.52 to 0.79)	9	1487	9		No Serious Inconsistency							+++
	incidence of bacteremia	0.51 (0.35 to 0.76)	6	688	6		No Serious Inconsistency							+++
	the incidence of diarrhea	0.69 (0.47 to 1.02)	8	1219	8		Serious Inconsistency							++
WANG F Y 2021	Symptom scores	-0.09 (-0.44 to 0.26)	3	251	3	Serious Risk	No Serious Inconsistency	No Serious Indirectness	No Serious Risk	Undetected	No	No	No	+++
	Infection rate	0.80 (0.64 to 1.01)	5	286	5		Serious Inconsistency							++
WANG Y Z 2016	the number of subjects having at least 1 RTI episode	0.89 (0.82 to 0.96)	17	4513	17	Serious Risk	Very Serious Inconsistency	No Serious Indirectness	No Serious Risk	Undetected	No	No	No	+
	the duration of RTI illness episodes	-0.60 (-1.49 to 0.30)	9	2817	9		Very Serious Inconsistency							+
	the number of days of RTI illness	-0.16 (-0.29 to -0.02)	6	2067	6		No Serious Inconsistency							+++
	the days absent from day care/school	-0.94 (-1.72 to -0.15)	8	1499	8		Very Serious Inconsistency							+
IRWIN C 2020	Δ PSQI score	0.78 (0.40 to 1.17)	11	452	NP	Serious Risk	No Serious Inconsistency	No Serious Indirectness	No Serious Risk	Undetected	No	No	No	+++
	sleep efficiency	0.02 (-1.21 to 1.24)	6	453
	sleep latency	0.69 (-1.36 to 0.51)	7	467
	score derived from other subjective ratings scales	0.08 (-0.14 to 0.30)	8	549
JIANG J 2021	EDSS scores	-1.22 (-2.40 to -0.03)	3	173	3	Serious Risk	Very Serious Inconsistency	No Serious Indirectness	No Serious Risk	Undetected	No	No	No	+
	BDI total scores	-1.58 (-3.03 to -0.12)	3	173	3		Very Serious Inconsistency							+
	GHQ scores	-0.71 (-1.02 to -0.40)	3	173	3		No Serious Inconsistency							+++
AS'HABI A 2020	cortisol	-0.28 (-0.65 to 0.09)	3	NP	3	Serious Risk	No Serious Inconsistency	No Serious Indirectness	No Serious Risk	Undetected	No	No	No	+++
	fecal zonulin	-0.63 (-1.17 to -0.08)	3		3		Very Serious Inconsistency							+
	HDL- C	2.51 (1.04 to 6.05) mg/dL	6		6		Serious Inconsistency							++
	LDL-C	-4.06 (-14.70 to 6.58) mg/dL	3		3		No Serious Inconsistency							+++
	TC	-5.99 (-10.83 to -6.04) mg/dL	6		6		Serious Inconsistency							++
	TG	-32.26 (-60.44 to -4.08) mg/dL	6		6		Very Serious Inconsistency							+
EJTAHED H 2021	serum calcium levels	3.82 (1.05 to 6.59)	4	NP	4	Serious Risk	Very Serious Inconsistency	No Serious Indirectness	No Serious Risk	Undetected	No	No	No	+
	serum phosphorus levels	1.14 (-0.44 to 2.73)	4		4
	parathyroid hormone (PTH)	-5.35 (-9.83 to -0.86)	3		3
	urinary calcium	4.85 (1.16 to 8.53)	3		3
	Spinal bone mineral density (BMD)	0.65 (-0.18 to 1.47)	4		4
	total hip bone mineral density (BMD)	1.45 (-0.38 to 3.28)	3		3
RAO S 2009	Stool pH	-0.65 (-0.76 to -0.54)	6	470	6	Serious Risk	Very Serious Inconsistency	No Serious Indirectness	No Serious Risk	Undetected	No	No	No	+
	Physical Growth During the First Year of Life	1.07 (0.14 to 1.99) g	4	436	4		No Serious Inconsistency							+++
LOHNER S 2014	Incidence of infections requiring antibiotic therapy	0.68 (0.61 to 0.77)	3	1122	3	Serious Risk	No Serious Inconsistency	No Serious Indirectness	No Serious Risk	Undetected	No	No	No	+++
	Diarrheal episodes	0.71 (0.35 to 1.43)	3	606	3		Very Serious Inconsistency							+
MCLOUGHLIN R F 2017	CRP	-0.60 (-0.98 to -0.23)	7	342	7	Serious Risk	Serious Inconsistency	No Serious Indirectness	No Serious Risk	Undetected	No	No	No	++
	IL-6	0.35 (-0.84 to 0.13)	6	313	6		Very Serious Inconsistency							+
	TNF-α	-0.49 (-1.20 to 0.22)	4	219	4		Very Serious Inconsistency							+
WILSON B 2019	overall symptom response to treatment	0.62 (0.07 to 5.69)	3	191	3	Serious Risk	Very Serious Inconsistency	No Serious Indirectness	No Serious Risk	Undetected	No	No	No	+
	QoL, quality of life	0.06 (-0.14 to 0.25)	4	322	4		No Serious Inconsistency							+++
	Anxiety	-0.23 (-0.54 to 0.08)	3	171	3		No Serious Inconsistency							+++
	Bifidobacteria	1.16 (0.06 to 2.26)	3	200	3		Very Serious Inconsistency							+
	Adverse events	0.77 (0.47 to 1.26)	4	355	4		No Serious Inconsistency							+++
	integrative symptom score	-0.39 (-1.43 to 0.64)	8	NP	8		Very Serious Inconsistency							+
	severity of abdominal pain	-0.83 (-1.84 to 0.18)	10		10
	bloating	-0.57 (-1.67 to 0.52)	9		9
	flatulence	-0.53 (-2.04 to 0.98)	6		6
CHI C 2019	Effects on sepsis	0.64 (0.51 to 0.78)	11	1106	11	Serious Risk	No Serious Inconsistency	No Serious Indirectness	No Serious Risk	Undetected	No	No	No	+++
	necrotizing enterocolitis	0.79 (0.14 to 1.44)	6	737	6
	mortality	0.58 (0.36 to 0.94)	9	924	9
	eeding intolerance	0.87 (0.52 to 1.45)	4	413	4
	full enteral feeding	-0.99 (-1.15 to -0.83)	7	576	7
	length of hospital stay	-5.18 (-8.94 to -1.41)	8	733	8		Very Serious Inconsistency			Detected				+
	stool frequency	0.52 (0.30 to 0.73)	6	294	6		No Serious Inconsistency			Undetected				+++
STACHOWSKA E 2020	BMI	-0.49 (-0.86 to -0.13)	4	NP	4	Serious Risk	No Serious Inconsistency	No Serious Indirectness	No Serious Risk	Undetected	No	No	No	+++
DA SILVA BORGES D 2020	postprandial ghrelin	-71.66 (-148.83 to 5.50) pg/ml	3	NP	NP	Serious Risk	Very Serious Inconsistency	No Serious Indirectness	No Serious Risk	Undetected	No	No	No	+
CAPURSO G 2016	small intestinal bacterial overgrowth (SIBO)	36% ( 17% to 60%)	9	NP	0	No Serious Risk	Very Serious Inconsistency	No Serious Indirectness	No Serious Risk	Undetected	No	No	No	+
		4.1 (1.6 to 10.4)	7	513	0		Serious Inconsistency							++
SHAH A 2017	prevalence of small intestinal bacterial overgrowth (SIBO)	7.15 ( 4.91 to 10.41)	21	NP	0	No Serious Risk	No Serious Inconsistency	No Serious Indirectness	No Serious Risk	Undetected	No	No	No	+++
MASLENNIKOV R 2018	prevalence of small intestinal bacterial overgrowth (SIBO)	6.83 (4.16 to 11.21)	21	1570	NP	Serious Risk	No Serious Inconsistency	No Serious Indirectness	No Serious Risk	Undetected	No	No	No	++
	Prevalence of ascites	2.72 (1.65 to 4.50)	5	NP			No Serious Inconsistency							++
	minimal hepatic encephalopathy	6.28 (2.10 to 18.80	3	NP			Serious Inconsistency							+
	spontaneous bacterial peritonitis	3.28 (1.36 to 7.90)	7	NP			No Serious Inconsistency							++
WIJARNPREECHA K 2020	Nonalcoholic fatty liver disease (NAFLD)	3.82 (1.93 to 7.59)	10	NP	0	No Serious Risk	Serious Inconsistency	No Serious Indirectness	No Serious Risk	Undetected	No	No	No	++
GHOSHAL U C 2020	Prevalence of a positive lactulose hydrogen breath test (LHBT) in IBS	1.3 (0.8 to 1.9)	9	1104	0	No Serious Risk	Very Serious Inconsistency	No Serious Indirectness	No Serious Risk	Undetected	No	No	No	+
	Prevalence of a positive glucose hydrogen breath test (GHBT) in IBS	4.23 (3.02 to 5.95)	9	2193			No Serious Inconsistency							+++
	Prevalence of SIBO on upper gut aspirate culture in IBS	3.01 (1.31 to 6.90)	5	508
	Prevalence of SIBO	1.40 (0.96 to 2.02)	6	609
CHEN B 2018	Prevalence of SIBO	4.7 (3.1 to 7.2)	23	4407	0	No Serious Risk	Serious Inconsistency	No Serious Indirectness	No Serious Risk	Undetected	No	No	No	++
GANDHI A 2021	methane positive SIBO	1.1 (0.8 to 1.5)	9	NP	0	No Serious Risk	No Serious Inconsistency	No Serious Indirectness	No Serious Risk	Undetected	No	No	No	+++
	methane positive SIBO	0.5 (0.2 to 1.3)	6	1055			Serious Inconsistency							++
FENG X 2021	Prevalence of SIBO	12.51 (6.51 to 24.03)	5	475	0	No Serious Risk	No Serious Inconsistency	No Serious Indirectness	No Serious Risk	Undetected	No	No	No	+++
	diarrhea	8.82 (4.09 to 19.00)	6	249
WIJARNPREECHA K 2020	Prevalence of SIBO	2.08 (0.82-5.31)	5	1187	0	No Serious Risk	Very Serious Inconsistency	No Serious Indirectness	No Serious Risk	Detected	No	No	No	+
LI X Q 2021	Prevalence of SIBO	5.22 (3.33 to 8.19)	4	559	0	No Serious Risk	No Serious Inconsistency	No Serious Indirectness	No Serious Risk	Undetected	No	No	No	+++
	prevalence of bloating in PD patients	1.67 (0.65 to 4.27)	5	401			Serious Inconsistency							++
	disease duration	-0.25 (-3.64 to 3.14)	3	186			Very Serious Inconsistency							+
	prevalence of constipation	0.38 (0.08 to 1.78	4	368			Very Serious Inconsistency							+
	diarrhoea	1.06 (0.58 to 1.91)	4	368			No Serious Inconsistency							+++
ZENG Y 2021	circulating trimethylamine N-oxide (TMAO) concentrations	67.9 (52.7 to 83.2)μmol/L	6	770	0	No Serious Risk	Very Serious Inconsistency	No Serious Indirectness	No Serious Risk	Undetected	No	No	No	+
	GFR	12.9 (-16.6 to -9.14) mL/(min 1.73 m2)	16	28260
FARHANGI M A 2020	stroke	1.68 (0.87 to 3.24)	5	4910	0	No Serious Risk	Very Serious Inconsistency	No Serious Indirectness	No Serious Risk	Undetected	No	No	Yes	+
	the circulating levels of trimethylamine N-oxide (TMAO)	2.20 (1.21 to 3.18)μmol/L	4	2484
YAO M E 2020	The relationship between TMAO plasma levels and incidence of major adverse cardiac events (MACE)	1.87 ( 1.41 to 2.47)	7	NP	0	No Serious Risk	Serious Inconsistency	No Serious Indirectness	No Serious Risk	Undetected	No	No	Yes	+
QI J Q 2018	the association between baseline TMAO and cardiovascular events (CVEs) risk	1.23 (1.07 to 1.42)	5	8139	0	No Serious Risk	No Serious Inconsistency	No Serious Indirectness	No Serious Risk	Undetected	No	No	Yes	+++
SCHIATTARELA G G 2017	all-cause mortality	1.79 (1.23 to 2.60)	10	13195	0	No Serious Risk	Very Serious Inconsistency	No Serious Indirectness	No Serious Risk	Undetected	No	No	Yes	+
		2.27 (1.13 to 4.58)	5	2467
	the incidence of () MACCE	1.67 (1.33 to 2.11)	5	13944			No Serious Inconsistency							+++
FARHANGI M A 2020	mortality risk	1.466 (1.291 to 1.665)	20	31230	0	No Serious Risk	Very Serious Inconsistency	No Serious Indirectness	No Serious Risk	Detected	No	No	No	+
HEIANZA Y 2017	major adverse cardiovascular events (MACE)	1.62 (1.43 to 1.85)	19	19256	0	No Serious Risk	No Serious Inconsistency	No Serious Indirectness	No Serious Risk	Undetected	No	No	No	+++
	Associations of elevated L-carnitine or choline concentrations and the risk of MACE	1.26 (1.10 to 1.44)	6	NP
	the association of elevated betaine concentrations with the risk of MACE	1.43 (1.19 to 1.73)	6	NP
GUASTI L 2021	absolute risk of MACE	2.05 (1.61 to 2.61)	3	3089	0	No Serious Risk	No Serious Inconsistency	No Serious Indirectness	No Serious Risk	Undetected	No	No	No	+++
	The absolute risk of all-cause mortality	3.42 (2.27 to 5.15)	3	1801
ABBASALIZAD F M 2021	systolic blood pressure	2.16 (1.11 to 3.21) mmHg	9	15097	0	No Serious Risk	Serious Inconsistency	No Serious Indirectness	No Serious Risk	Detected	No	No	Yes	++
	diastolic blood pressure	0.44 (-0.93 to 1.81)	7	8811			Very Serious Inconsistency			Undetected				+
	high-density lipoprotein cholesterol	-0.55 (-1.78 to 0.69)	13	NP			Very Serious Inconsistency							+
	low-density lipoprotein cholesterol	-0.52 (-2.34 to 1.29)	13	NP			Serious Inconsistency							++
	triglycerides	1.16 (-0.45 to 2.77)	12	NP			Serious Inconsistency							++
	total cholesterol	0.44 (-3.05 to 3.92)	9	NP			Very Serious Inconsistency							+
GE X 2019	hypertension prevalence	1.12 (1.06 to 1.17)	8	11750	0	No Serious Risk	Serious Inconsistency	No Serious Indirectness	No Serious Risk	Undetected	No	No	Yes	++
HAN L 2019	The prevalence of diabetes	1.89 (1.63 to 2.19)	9	12961	0	No Serious Risk	Serious Inconsistency	No Serious Indirectness	No Serious Risk	Undetected	No	No	Yes	++
	TMAO levels	0.36 (0.30 to 0.42)	5	5330			No Serious Inconsistency							+++
LI W 2020	association between TMAO level and MACEs in patients with heart failure	1.68 (1.44 to 1.96)	7	6879	0	No Serious Risk	No Serious Inconsistency	No Serious Indirectness	No Serious Risk	Undetected	No	No	No	+++
	association between TMAO level and all-cause mortality in patients with heart failure	1.67 (1.17 to 2.38)	5	NP			Serious Inconsistency							++
DEHGHAN P 2020	BMI	0.56 (0.03 to 1.10)	12	NP	0	No Serious Risk	Very Serious Inconsistency	No Serious Indirectness	No Serious Risk	Undetected	No	No	Yes	+
FARHANGI M A 2020	CRP concentrations	0.142 (0.094 to 0.190)	9	NP	0	No Serious Risk	Very Serious Inconsistency	No Serious Indirectness	No Serious Risk	Undetected	No	No	Yes	+
LUTHER J 2010	rate of H. pylori infection	0.64 (0.54 to 0.75)	24	NP	0	No Serious Risk	Very Serious Inconsistency	No Serious Indirectness	No Serious Risk	Detected	No	No	No	+
LIU R Q 2019	the risk of Nonalcoholic fatty liver disease (NAFLD)	1.529 (1.336 to 1.750)	21	NP	0	No Serious Risk	Very Serious Inconsistency	No Serious Indirectness	No Serious Risk	Undetected	No	No	No	+
DARDIOTIS E 2020	anti−H. pylori IgG	42.45 (9.66 to 186.56)	3	105	0	No Serious Risk	No Serious Inconsistency	No Serious Indirectness	No Serious Risk	Undetected	No	No	No	+++
	serum antibody	2.31 (1.30 to 4.11)	4	325			Serious Inconsistency							++
NG Q X 2019	likelihood of H. pylori infection	1.47 (0.90 to 2.40)	9	NP	0	No Serious Risk	Very Serious Inconsistency	No Serious Indirectness	No Serious Risk	Undetected	No	No	No	+
CAO Y 2014	the bacterial count of F. prausnitzii	-0.94 (-1.07 to -0.80)	12	1278	0	No Serious Risk	Very Serious Inconsistency	No Serious Indirectness	No Serious Risk	Undetected	No	No	No	+
ZHUANG X 2019	acetate	-0.51 (-0.90 to -0.13)	9	596	0	No Serious Risk	Serious Inconsistency	No Serious Indirectness	No Serious Risk	Undetected	No	No	No	++
	propionate	-0.31 (-0.65 to 0.02)	8	581
	butyrate	-0.27 (-0.76 to 0.22)	9	602			Very Serious Inconsistency							+
	valerate	-0.65 (-1.02 to -0.28)	5	240			Serious Inconsistency							++
	total SCFAs	-0.51 (-0.95 to -0.07)	6	454
	acetate	-1.43 (-2.81 to -0.04)	5	216			Very Serious Inconsistency							+
	propionate	-0.23 (-0.79 to 0.32)	5	216			Serious Inconsistency							++
	butyrate	-0.77 (-1.39 to -0.14)	4	282
	valerate	-0.75 (-1.47 to -0.02)	4	194			Very Serious Inconsistency							+
	total SCFAs	-1.37 (-3.75 to 1.02)	3	168
SAFADI J M 2021	circulating levels of zonulin	0.97 (0.10 to 1.85)	4	198	0	No Serious Risk	Very Serious Inconsistency	No Serious Indirectness	No Serious Risk	Undetected	No	No	No	+
	levels of antibodies against bacterial endotoxins	0.99 ( 0.27 to 1.70)	7	1707
	circulating levels of sCD14	0.54 (0.16 to 0.81)	2	2196
	levels of circulating alpha-1-antitrypsin (A-1-AT)	1.23 (0.57 to 1.88)	6	551
	levels of circulating intestinal fatty-acid binding protein (I-FABP)	0.27 (-0.07 to 0.60)	4	193			No Serious Inconsistency							+++
WANG L 2020	fecal Lactobacillus	-0.57 (-0.99 to -0.16) log10CFU/g;	17	1097	0	No Serious Risk	Very Serious Inconsistency	No Serious Indirectness	No Serious Risk	Undetected	No	No	No	+
	fecal Bifidobacterium	-1.04 (-1.58 to -0.49) log10CFU/g	17	1097						Detected
	fecal Bacteroides	0.13 (-0.06 to 0.32) log10CFU/g	11	654			Serious Inconsistency			Undetected				++
	Enterococcus	0.12 (-0.46 to 0.70) log10CFU/g	13	839			Very Serious Inconsistency							+
	Escherichia coli	0.60 (0.17 to 1.03) log10CFU/g	10	632
	Enterobacter	0.74 (0.01 to 1.47) log10CFU/g	7	435
KIM K N 2019	acetate in the blood and feces	0.87 (0.24 to 1.50)	8	NP	0	No Serious Risk	Very Serious Inconsistency	No Serious Indirectness	No Serious Risk	Undetected	No	No	No	+
	Propionate in feces	0.86 (0.35 to 1.36)	7
	Valerate in feces	0.32 (0.00 to 0.64)	3				No Serious Inconsistency							+++
	Butyrate	0.78 (0.29 to 1.27)	7				Very Serious Inconsistency							+
	total Short chain fatty acids (SCFAs) in the feces	0.54 (-0.34 to 1.41)	8
	iso-butyrate in the feces	0.01 (-0.28 to 0.29)	4				No Serious Inconsistency							+++
	iso-valerate in the feces	-0.20 (-0.46 to 0.06)	5
	Bacteroidetes	-0.36 (-0.73 to 0.01)	4				Very Serious Inconsistency							+
	Firmicutes	-0.10 (-0.31 to 0.10)	4				Serious Inconsistency							++
QU H 2019	levels of TNF-α	-0.24 (-0.69 to 0.21)	7	NP	7	Serious Risk	Very Serious Inconsistency	No Serious Indirectness	No Serious Risk	Undetected	No	No	No	+
	IL-6	-0.13 (-0.74 to 0.49)	6		6
	IL-10	1.00 (-0.15 to 2.15)	6		6
	CRP	-1.28 (-2.62 to 0.06)	4		4
	IL-8	-0.03 (-0.67 to 0.61)	4		4
ZHOU J 2020	the alpha diversity (Simpson index)	-0.14 (-0.26 to -0.02)	12	1288	0	No Serious Risk	No Serious Inconsistency	No Serious Indirectness	No Serious Risk	Undetected	No	No	No	+++
	the alpha diversity (Simpson index)	-0.27 (-0.43 to -0.11)	6	632
SANADA K 2020	Shannon Index	0.15 (-0.12 to 0.42)	4	NP	0	No Serious Risk	No Serious Inconsistency	No Serious Indirectness	No Serious Risk	Undetected	No	No	No	+++
	Simpson index	0.29 (-0.11 to 0.69)	4
GOU X 2021	fasting blood glucose (FPG)	-0.87 (-1.26 to -0.49)	4	348	4	Serious Risk	Very Serious Inconsistency	No Serious Indirectness	No Serious Risk	Undetected	No	No	No	+
	HbA1c	-0.69 (-1.24 to -0.14) %	4	253	4
	2-h postprandial blood glucose (2hPG)	-0.83 (-1.01 to -0.65)	3	253	3		No Serious Inconsistency							+++
	HOMA-IR	-0.99 (-1.25 to -0.73)	3	263	3
OJO O 2021	total cholesterol	-1.05 (-2.07 to 0.02) mmol/L	7	356	7	Serious Risk	Very Serious Inconsistency	No Serious Indirectness	No Serious Risk	Undetected	No	No	No	+
	triglyceride	0.05 (-0.12 to 0.22) mmol/L	6	317	6		No Serious Inconsistency							+++
	HDL cholesterol	-0.04 (-0.11 to 0.03) mmol/L	7	355	7
	LDL cholesterol	-0.09 (-0.30 to 0.11) mmol/L	8	408	8		Very Serious Inconsistency							+
	C-reactive protein	0.43 (0.02 to 0.84) mg/L	4	173	4		Serious Inconsistency		Serious Risk					+
	IL-6	0.45 (-0.61 to 1.50) pg/mL	4	172	4		No Serious Inconsistency							++
	TNF-α	2.10 (-3.13 to 7.32) pg/mL	4	172	4		Very Serious Inconsistency							+
	Body Mass Index (BMI)	-0.57 (-1.02 to -0.12) kg/m2	6	319	6		No Serious Inconsistency		No Serious Risk					++
NIKOLOVA V L 2021	observed species	-0.26 (-0.47 to -0.06)	20	1686	0	No Serious Risk	Very Serious Inconsistency	No Serious Indirectness	No Serious Risk	Undetected	No	No	No	+
		-0.16 (-0.58 to 0.27)	6	NP
		-0.61 (-1.19 to -0.03)	3	NP
		-0.04 (-0.31 to 0.24)	4	NP			No Serious Inconsistency							+++
	Chao 1	-0.50 (-0.79 to -0.21)	26	1917			Very Serious Inconsistency							+
		-0.34 (-1.08 to 0.40)	6	NP
		-0.53 (-1.01 to -0.05)	4	NP			Serious Inconsistency							++
		-0.58 (-1.29 to 0.12)	7	NP			Very Serious Inconsistency							+
		-0.86 (-1.52 to -0.21)	4	NP
	Shannon index	-0.12 (-0.27 to 0.03)	29	2348			Serious Inconsistency							++
		-0.28 (-0.62 to 0.06)	11	NP			Very Serious Inconsistency							+
		0.09 (-0.43 to 0.62)	4	NP			Serious Inconsistency							++
		-0.02 (-0.20 to 0.17)	8	NP			No Serious Inconsistency							+++
	Simpson index	0.04 (-0.13 to 0.21)	11	795
		0.14 (-0.14 to 0.43)	5	NP
		0.03 (-0.34 to 0.28）	3	NP
	phylogenetic diversity	-0.24 (0.47 to 0.00)	10	866			Serious Inconsistency							++
		-0.42 (-0.96 to 0.13)	4	NP			Very Serious Inconsistency							+
		-0.01 (-0.22 to 0.20)	3	NP			No Serious Inconsistency							+++
SHARPTON S R 2019	liver stiffness measurement (LSM)	-0.70 (-1.00 to -0.40) kpa	4	235	4	Serious Risk	Very Serious Inconsistency	No Serious Indirectness	No Serious Risk	Undetected	No	No	No	+
	mprovement in hepatic steatosis, as graded by ultrasound	2.40 (1.50 to 3.84)	6	384	6		No Serious Inconsistency							+++
CHANG Y 2016	SCORAD values at 8 weeks	-6.56 (-11.43 to -1.68)	6	NP	6	Serious Risk	Very Serious Inconsistency	No Serious Indirectness	No Serious Risk	Undetected	No	No	No	+
GETHINGS-BEHNCKE C 2020	F. nucleatum prevalence	10.06 (4.48 to 22.58)	6	NP	NP	Serious Risk	No Serious Inconsistency	No Serious Indirectness	No Serious Risk	Undetected	No	No	No	++
	F. nucleatum DNA being detected	1.83 (1.07 to 3.16)	5				Serious Inconsistency							+
		2.51 (1.20 to 5.27)	3				No Serious Inconsistency							++
		2.51 (1.20 to 5.27)	7				Serious Inconsistency							+
		9.01 (3.39 to 23.95)	7				Very Serious Inconsistency
	Poor overall survival among patients with colorectal cancer	1.87 (1.12 to 3.11)	5				Serious Inconsistency
	disease-free survival among patients with colorectal cancer	1.48 (0.84 to 2.59)	3				Very Serious Inconsistency
LI F 2021	abundance of Escherichia	1.55 (0.57 to 2.54)	6	294	NP	Serious Risk	Very Serious Inconsistency	No Serious Indirectness	No Serious Risk	Undetected	No	No	No	+
	abundance of Prevotella	1.89 (0.02 to 3.76)	8	502
	abundance of Streptococcus	1.33 (0.62 to 2.05)	6	418
	genera Coprococcus	-1.75 (-3.13 to -0.37),	4	197
	Faecalibacterium	-13.23 (-17.59 to -8.87)	7	557
	Ruminococcus	-1.84 (-2.41 to -1.27)	6	362
	Bacteroides	-2.12 (-4.49 to 0.25)	7	497
	Bifidobacterium	-0.68 (-1.89 to 0.53)	4	185
	Blautia	0.17 (-1.83 to 1.73)	8	504
	Clostridium	0.42 (-0.80 to 1.64)	5	352
	Dorea	1.45 (-0.20 to 3.10)	4	241
	Lactobacillus	-0.05 (-0.82 to 0.72)	5	274
	Parabacteroides	0.49 (-0.26 to 1.24)	6	357
	Roseburia	-0.90 (-2.70 to 0.91)	5	224
SUN Q 2018	concentration of acetate	0.05 (-0.16 to 0.27)	8	NP	NP	Serious Risk	No Serious Inconsistency	No Serious Indirectness	No Serious Risk	Undetected	No	No	No	++
	proportion of acetate	-0.27 (-0.59 to 0.05)	4				Serious Inconsistency							+
	concentration of propionate	-0.04 (-0.52 to 0.44)	8				Very Serious Inconsistency							+
	proportion of propionate	0.44 (0.12 to 0.76)	4				No Serious Inconsistency							++
	concentration of butyrate	0.12 (-0.11 to 0.35)	7				Serious Inconsistency							+
	proportion of butyrate	0.05 (-0.68 to 0.78)	4				Very Serious Inconsistency							+
	concentration of iso-butyrate	-0.15 (-0.91 to 0.60)	4				Very Serious Inconsistency							+
	proportion of iso-butyrate	0.25 (-0.07 to 0.56)	4				No Serious Inconsistency							++
	concentration of valerate	-0.03 (-0.35 to 0.28)	4				Serious Inconsistency							+
	proportion of valerate	-0.19 (-1.07 to 0.69)	4				Very Serious Inconsistency							+
	concentration of iso-valerate	-0.38 (-1.18 to 0.42)	4
	proportion of iso-valerate.	-0.43 (-1.54 to 0.69)	4
MALAGON-ROJAS J N 2020	duration of diarrhea episodes	-20.31 (-27.06 to -13.57)	4	224	4	Serious Risk	No Serious Inconsistency	No Serious Indirectness	No Serious Risk	Undetected	No	No	No	+++
ZHU H F 2020	Quality of Life	-0.14(-0.45 to 0.17)	3	159	3	Serious Risk	No Serious Inconsistency	No Serious Indirectness	Serious Risk	Undetected	No	No	No	+++
	Excess Weight Loss	0.45 (-0.16 to 1.05)	4	154	4		Serious Inconsistency							++
	CRP	0.02 (-0.32 to 0.36)	3	135	3		No Serious Inconsistency							+++
	IL-6	-0.10 (-0.81 to 0.61)	3	135	3
	TNF-α	-0.29 (-0.64 to 0.05)	3	135	3
KAHN J 2020	Infection Rates	0.46 (0.31 to 0.67)	11	913	10	Serious Risk	Serious Inconsistency	No Serious Indirectness	No Serious Risk	Undetected	No	No	No	+
KADOSH K C 2021	continuous anxiety outcomes	-0.03(-0.21 to 0.14)	5	617	NP	Serious Risk	No Serious Inconsistency	No Serious Indirectness	No Serious Risk	Undetected	No	No	No	++
SUN M 2021	Infant Eczema	0.60 (0.47 to 0.78)	10	2093	10	Serious Risk	Serious Inconsistency	No Serious Indirectness	No Serious Risk	Undetected	No	No	No	++
	Occurrence of Adverse Events	1.09 (0.83 to 1.44)	6	1309	6		No Serious Inconsistency							+++
MILAJERDI A 2021	risk of UC	1.09 (0.88 to 1.34)	7	NP	NP	Serious Risk	No Serious Inconsistency	No Serious Indirectness	No Serious Risk	Undetected	No	No	No	++
	risk of CD	0.59 (0.46 to 0.74)	6
	risk of UC	0.69 (0.55 to 0.86)	4				Very Serious Inconsistency							+
	risk of CD	0.47 (0.38 to 0.58)	4				Serious Inconsistency							+
	risk of UC	0.56 (0.48 to 0.66)	3
	risk of CD	0.52 (0.46 to 0.59)	3				Very Serious Inconsistency							+
CHAN C K Y 2020	the number of participants who experienced ≥1 RTI episode	0.84 (0.73 to 0.96)	9	2845	NP	Serious Risk	Serious Inconsistency	No Serious Indirectness	No Serious Risk	Undetected	No	No	No	+
	the proportion of participants experiencing RTIs	0.84 (0.74 to 0.95)	7	7273
ZAMA D 2021	the incidence of Gastrointestinal acute graft-versus-host-disease (aGvHD),	0.69 (0.56 to 0.86)	7	495	NP	Serious Risk	No Serious Inconsistency	No Serious Indirectness	No Serious Risk	Undetected	No	No	No	++
	The incidence of aGvHD grade III-IV	0.44 (0.30 to 0.64)	5	522
	Gut aGvHD	0.44 (0.30 to 0.66)	4	396
	the incidence of mucositis grade III-IV	0.95 (0.83 to 1.09)	5	530
	overall survival at day +100	1.07 (0.95 to 1.21)	5	530			Serious Inconsistency							+
SORENSEN K 2021	the proportion of infants who had infections	0.35 (0.19 to 0.67)	3	NP	3	Serious Risk	No Serious Inconsistency	No Serious Indirectness	No Serious Risk	Undetected	No	No	No	+++
	percentages of Bifidobacterium species	31.75 (26.04 to 37.45)	3		3		Serious Inconsistency							++
	percentages of Eubacterium rectale and Clostridium coccoides	-19.06 (-23.15 to -14.97)	3		3		No Serious Inconsistency							+++
JIA L 2021	blood urea nitrogen (BUN)	-6.91 (-11.87 to -1.95)	4	148	4	Serious Risk	No Serious Inconsistency	No Serious Indirectness	Serious Risk	Undetected	No	No	No	++
	serum creatinine (Scr)	-7.43 (-11.99 to -2.86)	3	119	3		Serious Inconsistency							+
	uric acid (UA)	-7.43 (-11.99 to -2.86)	3	108	3		No Serious Inconsistency							++
	indoxyl sulfate (IS)	-0.33 (-0.70 to 0.04)	3	115	3
	p-cresyl sulfate (PCS) in serum and plasma	-0.33 (-0.70 to 0.04)	3	115	3
	interleukin (IL)-6	-1.08 (-1.64 to -0.53)	3	95	3		Serious Inconsistency							+
	high sensitive C-reaction protein (hsCRP) in serum	-1.08 (-1.64 to -0.53)	3	95	3		No Serious Inconsistency							++
	albumin in serum	0.06 (-0.06 to -0.18)	4	159	4
	phosphorus in serum	-0.03 (-0.36 to 0.30)	5	179	5
van LANEN A 2021	IBS severity	-0.66 (-0.88 to -0.44)	12	772	NP	Serious Risk	Serious Inconsistency	No Serious Indirectness	No Serious Risk	Detected	No	No	No	+
	IBS Severity Scoring System (IBS-SSS)	-45.13 (-76.56 to -13.69)	7	503			Very Serious Inconsistency			Undetected				+
	Quality of life	4.93 (1.77 to 8.08)	6	483			Serious Inconsistency							+
SALARI A 2021	fasting blood sugar (FBS)	-10.28 (-16.53 to -4.02)	7	323	NP	Serious Risk	Serious Inconsistency	No Serious Indirectness	No Serious Risk	Undetected	No	No	No	+
	HbA1c	-0.64 (-1.36 to 0.08)	4	271			Very Serious Inconsistency
	insulin levels	-2.87 (-3.96 to -1.78)	3	169
Fatahi S 2021	depression	0.76 (0.64 to 0.90)	5	97023		Serious Risk	Serious Inconsistency	No Serious Indirectness	No Serious Risk	Undetected	No	No	No	+
Kinross JM 2013	septic complications	0.42 (0.23 to 0.75)	5	NP	NP	Serious Risk	Serious Inconsistency	No Serious Indirectness	No Serious Risk	Undetected	No	No	No	++
		0.25 (0.10 to 0.60)	9
	Postoperative Pneumonia	0.38 (0.07 to 2.03)	3
		0.89 (0.31 to 2.55)	7
	Wound Infection	0.73 (0.29 to 1.81)	3
		0.48 (0.19 to 1.20)	7
	Urinary Tract Infection	0.54 (0.03 to 10.73)	3
		0.29 (0.07 to1.16)	6
	operative mortality	1.39 (0.57 to 3.44)	5
	Length of Hospital Stay	-0.07(-0.55 to 0.42)	7
	Length of Antibiotic Treatment	-1.71(-3.2 to-0.21)	4							Detected				+
Liu H 2016	Lactobacillus	-2.72 (-5.94 to 0.50)	4	NP	NP	Serious Risk	Very Serious Inconsistency	No Serious Indirectness	No Serious Risk	Undetected	No	No	No	+
	Bifidobacterium,	-3.30 (-6.57 to -0.03)	4
	Bacteroides-Prevotella	-0.71 (-2.56 to 1.14)	3
	Faecalibacterium	-0.33 (-0.60 to -0.05)	3				No Serious Inconsistency							++
Liu RT 2019	depression	-0.08 (-0.30 to 0.15)	5	NP	NP	Serious Risk	No Serious Risk	No Serious Indirectness	No Serious Risk	Undetected	No	No	No	++
	anxiety	0.12 (-0.03 to 0.27)	4
	depression	-0.24 (-0.36 to -0.12)	23				Serious Risk							+
	anxiety	-0.10 (-0.19 to -0.01)	22				No Serious Risk							++
Miller LE 2019	Polymorphonuclear cell phagocytic capacity	1.37 (0.86 to 1.88)	9	NP	NP	Serious Risk	Very Serious Inconsistency	No Serious Indirectness	No Serious Risk	Undetected	No	No	No	+
	natural killer (NK) cell tumoricidal activity	0.55 (0.37 to 0.73)	15				Serious Inconsistency							+
Prosberg M 2016	Clostridium coccoides	-0.49 (-0.79 to -0.19)	4	NP	NP	Serious Risk	No Serious Inconsistency	No Serious Indirectness	No Serious Risk	Undetected	No	No	No	++
	Clostridium leptum	-0.44 (-0.74 to -0.14)	4
	Escherichia coli	0.43 (-0.04 to 0.91)	3				Serious Inconsistency							+
	Faecalibacterium prausnitzii	-0.81 (-1.23 to -0.39)	6
	Bifidobacterium	-0.37 (-0.56 to -0.17)	7				No Serious Inconsistency							++
	Lactobacillus	-0.07 (-0.36 to 0.22)	4
Sohail G 2018	Clinical remission	1.21 (1.18 to 1.24)	45	1816/3624	45	Serious Risk	No Serious Inconsistency	No Serious Indirectness	No Serious Risk	Undetected	No	No	No	+++
	Endoscopy scores	0.71 (0.35 to 1.07)	7	270	7		Serious Inconsistency							++
	Histological scores	1.07 (0.92 to 1.23)	8	501	8		No Serious Inconsistency							+++
	adverse events	0.72 (0.55 to 0.94)	30	2430	30
Szajewska H 2018	the risk of eczema	0.90 (0.67 to 1.21)	5	778	5	Serious Risk	Serious Inconsistency	No Serious Indirectness	No Serious Risk	Undetected	No	No	No	++
Zhang J 2020	Functional dyspepsia (FD)	1.15 (1.01 to 1.30)	5	409	5	Serious Risk	No Serious Inconsistency	No Serious Indirectness	No Serious Risk	Undetected	No	No	No	+++
	Adverse events	0.27 (0.07 to 1.05)	5	409	5
